# Supplementary material for: Haploinsufficiency for Core Exon Junction Complex Components Disrupts Embryonic Neurogenesis and Causes p53-Mediated Microcephaly
Source: PLoS Genet. 2016 Sep 12;12(9):e1006282. doi: 10.1371/journal.pgen.1006282 (PMC5019403; doi:10.1371/journal.pgen.1006282)
Supplement: S1 Table — (XLSX) [file pgen.1006282.s008.xlsx]

## Sheet: HeaderInformation
			Header Information:
			GeneID	ENSEMBL Gene ID
			GeneName	Gene Name
			IsCoding	Is the gene a known coding gene
			logFC	Log2 Fold-Change between the two conditions being compared
			logCPM	Log2 Average expression of all of the samples being used in this comparision
			Pvalue	P-value
			FDR	FDR Corrected p-value
			<Sample ID>	Normalized expression value for the given sample

## Sheet: Rbm8a_vs_Emx1-Cre
GeneID	GeneName	IsCoding	logFC (Rbm8a / Emx1-Cre)	fold	logCPM	PValue	FDR	Rbm8a_1	Rbm8a_2	Rbm8a_3	Emx1-Cre_1	Emx1-Cre_2	Emx1-Cre_3
ENSMUSG00000086841	2410006H16Rik	FALSE	1.09911	2.14222	5.13539	3.35323e-24	6.1914e-20	43.861	50.5622	50.2009	21.1381	22.3666	23.9682
ENSMUSG00000038374	Rbm8a	TRUE	-0.741544	0.598099	7.15862	1.77645e-21	1.64002e-17	94.0132	99.6053	95.2776	152.785	164.724	165.474
ENSMUSG00000020326	Ccng1	TRUE	1.07145	2.10155	6.30778	4.81661e-17	2.96446e-13	97.859	120.556	117.983	51.033	53.1566	55.8537
ENSMUSG00000081344	Gm14303	FALSE	-1.7914	0.288891	3.33038	5.81945e-15	2.68626e-11	4.75292	6.34862	5.18674	22.7931	17.9775	15.6009
ENSMUSG00000034457	Eda2r	TRUE	2.09848	4.28258	3.23007	4.13759e-14	1.52793e-10	11.5372	13.3094	17.1225	2.82818	3.32506	3.63481
ENSMUSG00000096474	Gm5561	FALSE	-2.30697	0.202084	0.279052	5.07255e-14	1.56099e-10	0.47332	0.612188	0.416605	2.61869	2.81522	2.01534
ENSMUSG00000059159	Gm8129	FALSE	-2.94872	0.129523	-0.896707	1.55172e-13	4.09301e-10	0.0788867	0.158716	0.166642	1.23602	1.08619	0.827729
ENSMUSG00000058443	Rpl10-ps3	TRUE	-2.31354	0.201167	0.330436	8.69323e-13	2.0064e-09	0.532485	0.657536	0.520757	3.47762	2.92605	2.12331
ENSMUSG00000081214	Rpl35a-ps2	FALSE	-2.43459	0.184976	0.0491397	2.00443e-11	3.78373e-08	0.35499	0.49882	0.374945	2.53489	1.97287	2.1413
ENSMUSG00000067870	Rpl31-ps8	FALSE	-1.36858	0.387273	1.83591	2.24932e-11	3.78373e-08	2.14966	2.4941	2.43714	6.87144	5.76344	5.65015
ENSMUSG00000035202	Lars2	TRUE	1.4481	2.72849	8.52063	2.25417e-11	3.78373e-08	364.575	599.242	642.968	209.747	167.871	211.251
ENSMUSG00000088609	Gm24187	FALSE	1.59272	3.01618	3.4496	4.26833e-11	6.56753e-08	10.6694	17.368	20.1845	5.99156	3.92357	6.04602
ENSMUSG00000083424	Rpl35a-ps4	FALSE	-3.42107	0.0933587	-1.73879	9.21924e-11	1.24769e-07	0.0394434	0.113368	0.0416605	1.02653	0.620678	0.467847
ENSMUSG00000066724	Gm10175	TRUE	-2.6816	0.155868	0.646844	9.46036e-11	1.24769e-07	0.374712	0.861598	0.583247	3.85471	4.87676	2.93304
ENSMUSG00000080904	Gm11966	FALSE	-2.37444	0.192851	-1.05067	1.8167e-10	2.23624e-07	0.197217	0.136042	0.208303	0.87988	1.19702	0.791741
ENSMUSG00000082241	Gm15776	FALSE	-1.7689	0.293433	0.169548	5.95717e-10	6.87457e-07	0.631094	0.612188	0.74989	2.22065	2.68222	1.92537
ENSMUSG00000027985	Lef1	TRUE	-0.544615	0.685575	5.78914	8.45137e-10	9.17918e-07	48.3773	49.4512	44.0768	70.139	65.5702	71.2387
ENSMUSG00000041801	Phlda3	TRUE	1.24804	2.37518	3.30132	9.25582e-10	9.49442e-07	11.0836	14.4885	14.8728	6.4315	5.09843	5.48821
ENSMUSG00000062456	Rpl9-ps6	TRUE	-1.71896	0.303768	2.02423	1.25508e-09	1.15869e-06	1.79467	2.9249	2.37465	9.61583	7.73631	5.99204
ENSMUSG00000050299	Gm9843	TRUE	-1.3878	0.382147	2.18139	1.2147e-09	1.15869e-06	2.52437	3.17431	3.22869	9.30158	7.82498	6.24396
ENSMUSG00000098178	RP23-81C12.3	FALSE	1.45055	2.73313	11.6589	1.581e-09	1.39007e-06	3447.01	5634.13	6173.4	2131.76	1707.37	1742.21
ENSMUSG00000093126	Bc1	FALSE	-3.20542	0.108411	4.11115	2.19041e-09	1.83835e-06	3.96406	4.62542	4.99926	31.5709	43.4918	50.3295
ENSMUSG00000028893	Sesn2	TRUE	0.771713	1.7073	4.59927	2.55262e-09	2.0492e-06	26.6637	30.9722	30.5997	17.032	15.8938	18.7139
ENSMUSG00000081926	Gm15536	FALSE	-2.55701	0.169927	-0.0934046	4.66291e-09	3.58733e-06	0.295825	0.453473	0.416605	3.14243	2.0837	1.65546
ENSMUSG00000025592	Dach2	TRUE	1.98286	3.95275	2.95104	4.97908e-09	3.67735e-06	18.9328	13.4001	9.26947	2.61869	3.5024	4.39056
ENSMUSG00000038119	Cdon	TRUE	-0.756011	0.592131	7.64834	7.32409e-09	5.20123e-06	127.698	153.999	169.517	279.718	268.332	213.986
ENSMUSG00000076137	Gm26384	FALSE	-2.24516	0.21093	0.761075	7.9392e-09	5.42924e-06	0.532485	0.74823	1.02068	4.08516	4.58858	2.26726
ENSMUSG00000093077	Mir5105	FALSE	1.17233	2.25375	6.46417	1.15094e-08	7.58961e-06	78.0781	151.369	147.124	71.4797	43.0263	52.5608
ENSMUSG00000084328	Gm14046	FALSE	3.8118	14.0432	-0.984183	1.61267e-08	1.02677e-05	0.650815	0.884272	0.854041	0.125697	0.0221671	0.0179941
ENSMUSG00000064193	Gm4735	FALSE	-1.59914	0.330075	1.6041	2.26815e-08	1.39597e-05	1.65662	2.19934	1.49978	6.66195	5.20926	4.35458
ENSMUSG00000025478	Dpysl4	TRUE	0.639779	1.55809	6.42973	2.60501e-08	1.55158e-05	124.838	97.9275	85.9248	60.7745	68.3854	68.9715
ENSMUSG00000064368	mt-Nd6	TRUE	-0.528987	0.693041	8.29267	3.2121e-08	1.85338e-05	253.187	292.15	279.5	341.812	424.61	423.689
ENSMUSG00000043969	Emx2	TRUE	-0.627217	0.647424	7.24085	4.15485e-08	2.3247e-05	98.6084	125.272	130.481	177.631	200.213	169.487
ENSMUSG00000078154	Gm12184	TRUE	-1.74134	0.299091	0.383636	4.55429e-08	2.47325e-05	0.59165	0.770904	0.79155	2.57679	2.54921	2.08732
ENSMUSG00000083669	Gm10169	FALSE	-1.46153	0.363108	1.4788	4.81682e-08	2.50474e-05	1.69606	1.92726	1.66642	5.21643	5.5196	3.85074
ENSMUSG00000030110	Ret	TRUE	2.56717	5.92645	-0.397683	4.8836e-08	2.50474e-05	2.58354	0.816251	1.47895	0.251394	0.37684	0.197935
ENSMUSG00000081205	Gm5940	FALSE	-2.14512	0.226076	-1.15418	5.24054e-08	2.61517e-05	0.216938	0.272084	0.124982	1.21507	0.798015	0.719765
ENSMUSG00000037984	Neurod6	TRUE	-5.87797	0.0170041	-0.843307	6.18128e-08	3.00345e-05	0	0	0.0624908	2.1159	1.6847	0.323894
ENSMUSG00000053117	E330013P04Rik	TRUE	-0.866616	0.548432	4.54078	7.11969e-08	3.33532e-05	13.9235	19.2499	19.8304	36.5779	31.8762	28.1788
ENSMUSG00000034648	Lrrn1	TRUE	-0.669272	0.628824	8.62692	7.22555e-08	3.33532e-05	247.191	331.579	334.034	463.885	544.711	442.997
ENSMUSG00000021685	Otp	TRUE	5.55701	47.079	-0.654897	8.86345e-08	3.99158e-05	2.91881	1.13368	0.208303	0.0209495	0.0665012	0
ENSMUSG00000093098	Gm22641	FALSE	1.27629	2.42215	3.70331	9.32465e-08	4.09929e-05	11.9513	22.5376	21.601	8.61025	5.29793	9.21299
ENSMUSG00000076281	Gm24270	FALSE	1.48001	2.78951	2.37488	1.19907e-07	5.14875e-05	5.30513	8.07182	9.47777	3.31002	1.9507	2.91505
ENSMUSG00000031965	Tbx20	TRUE	8.66732	406.558	-1.69131	1.43578e-07	6.02505e-05	2.70187	0.181389	0.0624908	0	0	0
ENSMUSG00000028532	Cachd1	TRUE	-0.529298	0.692892	7.17135	1.5641e-07	6.41768e-05	115.589	115.885	124.752	185.152	167.871	161.119
ENSMUSG00000033350	Chst2	TRUE	-0.55185	0.682145	5.73088	1.69175e-07	6.79052e-05	40.0153	43.2613	45.5141	66.0329	65.9027	56.8974
ENSMUSG00000006369	Fbln1	TRUE	-0.381483	0.767648	6.84776	1.84906e-07	7.17171e-05	96.1235	101.079	103.735	142.603	121.786	127.614
ENSMUSG00000045799	Gm9800	FALSE	0.884264	1.84582	5.71479	1.8644e-07	7.17171e-05	60.23	65.5268	63.5948	29.2246	35.7333	37.6077
ENSMUSG00000027160	Ccdc34	TRUE	-0.564694	0.676099	6.46215	2.43196e-07	8.98076e-05	73.9957	80.4461	75.4472	106.193	120.168	113.651
ENSMUSG00000020723	Cacng4	TRUE	-0.542879	0.6864	6.29565	2.41675e-07	8.98076e-05	60.2497	65.3454	66.886	99.7616	95.2076	85.4721
ENSMUSG00000058603	Rpl28-ps1	FALSE	-1.14665	0.451674	1.93405	2.6021e-07	9.42062e-05	2.76103	2.42608	2.56212	6.45245	5.5861	5.14632
ENSMUSG00000083022	Rps15a-ps6	FALSE	-2.44319	0.183876	1.31031	3.26486e-07	0.000115928	0.59165	0.589515	0.458266	4.2737	2.88172	1.79941
ENSMUSG00000030609	Aen	TRUE	0.472132	1.38716	6.30828	3.41613e-07	0.00011901	88.4123	95.8642	94.8819	64.8387	66.9889	69.3853
ENSMUSG00000056856	Jakmip3	TRUE	1.99814	3.99484	-0.209318	3.76005e-07	0.000127484	2.16938	1.26972	0.874871	0.314243	0.266005	0.485841
ENSMUSG00000053129	Gsx1	TRUE	2.72119	6.59417	0.55001	3.79747e-07	0.000127484	4.29933	2.4941	1.33314	0.167596	0.554177	0.503835
ENSMUSG00000082127	Gm13577	FALSE	1.71916	3.29245	4.24816	3.94598e-07	0.000130105	24.869	26.1881	23.7048	7.66752	7.60331	7.43157
ENSMUSG00000074968	Ano3	TRUE	1.06804	2.09659	2.18155	4.34313e-07	0.000140687	5.58123	6.16723	6.93648	3.14243	2.54921	3.20295
ENSMUSG00000020140	Lgr5	TRUE	2.73028	6.63585	-0.703459	4.74451e-07	0.000151039	2.44549	0.634862	0.81238	0.230445	0.133002	0.215929
ENSMUSG00000091460	Gm7808	TRUE	-1.77669	0.291853	-0.307883	6.43055e-07	0.000201244	0.335269	0.430799	0.416605	1.73881	1.04185	1.27758
ENSMUSG00000049641	Vgll2	TRUE	6.17747	72.3777	-1.86329	6.72479e-07	0.000206944	1.1833	0.725557	0.0833211	0.0209495	0	0
ENSMUSG00000036111	Lmo1	TRUE	0.94645	1.92713	4.51089	6.90264e-07	0.000208935	24.5732	35.4843	29.1832	12.7583	18.3765	15.169
ENSMUSG00000044518	Foxe3	TRUE	6.80278	111.645	-3.0358	8.08642e-07	0.000240819	0.512764	0.226736	0.0624908	0	0	0
ENSMUSG00000028876	Epha10	TRUE	1.67969	3.20358	1.3076	9.13952e-07	0.00026786	5.08819	4.03591	2.58295	0.87988	1.06402	1.69145
ENSMUSG00000052957	Gas1	TRUE	-0.786797	0.579629	7.4314	1.00169e-06	0.000288987	97.4645	141.552	142.437	235.85	229.895	192.339
ENSMUSG00000085156	Gm11974	FALSE	0.756821	1.68976	3.65436	1.02853e-06	0.000292166	13.8052	16.8012	15.1228	8.12841	8.82249	10.0767
ENSMUSG00000039419	Cntnap2	TRUE	-0.613286	0.653706	7.93588	1.05033e-06	0.000293837	149.648	205.945	224.05	303.621	313.531	269.534
ENSMUSG00000056553	Ptprn2	TRUE	0.857527	1.81193	5.31579	1.12154e-06	0.000309076	59.9342	49.9047	44.8059	20.8029	31.2777	33.2531
ENSMUSG00000064372	mt-Tp	FALSE	-0.599042	0.660192	4.21793	1.19999e-06	0.000325834	14.4757	14.9873	15.8102	23.6939	22.1892	22.6906
ENSMUSG00000070870	Cryge	TRUE	2.52455	5.75395	-1.53436	1.27193e-06	0.000340361	0.70998	0.634862	0.187472	0.0837981	0.0443341	0.125959
ENSMUSG00000060019	Gm10073	TRUE	-1.23847	0.423822	2.05813	1.43153e-06	0.000377597	3.03714	3.28768	2.58295	8.81975	7.0713	5.14632
ENSMUSG00000024608	Rps14	TRUE	0.565568	1.47997	9.26797	1.89902e-06	0.000493852	669.768	733.787	712.458	460.973	444.073	524.672
ENSMUSG00000028565	Nfia	TRUE	-1.12384	0.45887	5.0645	1.96338e-06	0.000503498	16.1915	20.565	28.4333	53.8403	51.4276	36.816
ENSMUSG00000055675	Kbtbd11	TRUE	-0.709101	0.611701	5.64082	2.15456e-06	0.000544955	35.7554	38.2051	38.661	72.7577	65.9692	45.4351
ENSMUSG00000074578	1500012F01Rik	TRUE	0.537392	1.45135	5.78686	2.23163e-06	0.000556821	59.5595	68.8599	64.1156	39.7412	44.8662	48.0083
ENSMUSG00000040856	Dlk1	TRUE	1.0853	2.12182	7.22116	2.35625e-06	0.000580076	264.389	206.353	152.165	79.8386	99.5301	114.191
ENSMUSG00000055093	Gm8430	FALSE	-1.12467	0.458606	1.43836	2.46094e-06	0.00059788	1.49885	2.19934	1.7914	4.42035	3.79057	3.74278
ENSMUSG00000036298	Slc2a13	TRUE	-1.0389	0.486698	2.5783	2.79384e-06	0.000669942	3.58935	4.23997	4.41602	10.6633	8.17965	6.33393
ENSMUSG00000097451	Rian	FALSE	0.650387	1.56959	8.99118	2.99588e-06	0.000709178	710.809	650.393	551.044	355.346	404.97	457.968
ENSMUSG00000097428	RP23-168E14.4	FALSE	-0.792292	0.577426	4.08117	3.04485e-06	0.000711647	10.2158	13.2414	14.2271	23.7777	22.4109	19.0738
ENSMUSG00000034224	Slc38a8	TRUE	6.31923	79.8503	0.267627	3.11185e-06	0.000718215	13.0755	0.0226736	0.124982	0.0628485	0.0221671	0.0719765
ENSMUSG00000033790	Tubgcp5	TRUE	0.442298	1.35877	5.67317	3.32368e-06	0.000750501	59.3031	59.5183	58.3456	43.0094	44.6888	42.7
ENSMUSG00000002633	Shh	TRUE	7.28774	156.253	1.34968	3.33303e-06	0.000750501	6.29121	6.80209	6.01995	0	0.0221671	0.0899706
ENSMUSG00000057123	Gja5	TRUE	1.25153	2.38094	2.24721	3.58908e-06	0.000798419	7.0998	6.80209	7.33225	2.1578	4.03441	2.73511
ENSMUSG00000062006	Rpl34	TRUE	0.506785	1.42088	8.39606	4.04194e-06	0.000888456	354.773	416.243	402.003	273.873	264.963	286.682
ENSMUSG00000053477	Tcf4	TRUE	-0.523111	0.69587	7.71876	5.29978e-06	0.00112477	171.164	163.636	189.743	269.474	270.571	213.824
ENSMUSG00000026121	Sema4c	TRUE	0.321992	1.25006	6.3665	5.28966e-06	0.00112477	93.2244	87.0441	86.7372	72.4015	70.1144	71.0948
ENSMUSG00000002083	Bbc3	TRUE	0.769487	1.70466	3.23728	5.20566e-06	0.00112477	11.478	11.8583	11.2275	6.09631	6.33978	7.80945
ENSMUSG00000029714	Gigyf1	TRUE	0.437891	1.35462	6.579	5.71279e-06	0.00119865	109.751	104.435	113.525	78.8121	86.4959	76.6549
ENSMUSG00000083087	Gm11249	FALSE	-1.32963	0.397869	-0.426988	6.17569e-06	0.00128121	0.433877	0.566841	0.437436	1.50836	1.21919	0.899706
ENSMUSG00000036781	Rps27l	TRUE	0.489193	1.40366	6.56676	6.4026e-06	0.00131353	99.6734	117.381	110.213	72.3596	77.0527	83.6906
ENSMUSG00000058625	Gm17383	FALSE	-1.5132	0.350333	-0.253562	6.68403e-06	0.00133797	0.394434	0.544167	0.374945	1.23602	1.30786	1.20561
ENSMUSG00000019873	Reep3	TRUE	-0.381094	0.767855	6.79646	6.62117e-06	0.00133797	96.0446	99.3559	103.464	132.673	135.108	121.478
ENSMUSG00000086324	Gm15564	FALSE	1.22418	2.33623	4.00732	6.73911e-06	0.00133797	11.9513	27.2764	29.9956	12.5278	8.91116	8.18732
ENSMUSG00000076258	Gm23935	FALSE	1.13672	2.1988	4.13829	7.65327e-06	0.0015033	13.9235	28.1153	28.4541	12.3183	8.20182	11.5162
ENSMUSG00000031375	Bgn	TRUE	-0.799194	0.57467	5.58803	8.06456e-06	0.00155108	36.8204	33.7157	40.1191	83.7981	56.9694	51.8231
ENSMUSG00000072889	Nfxl1	TRUE	0.347723	1.27255	5.89419	8.04804e-06	0.00155108	66.7973	67.7942	63.8448	49.1266	54.0433	52.7588
ENSMUSG00000026586	Prrx1	TRUE	-0.463921	0.725013	6.35273	8.16945e-06	0.00155506	58.1592	70.5604	77.4053	102.276	92.0377	89.9706
ENSMUSG00000028444	Cntfr	TRUE	-0.543998	0.685868	6.675	8.28126e-06	0.00156026	71.4319	83.2123	95.2568	117.087	131.916	115.36
ENSMUSG00000040354	Mars	TRUE	0.354447	1.2785	7.09661	8.73514e-06	0.00162915	147.853	153.138	148.145	109.922	115.646	125.671
ENSMUSG00000098234	Snhg6	FALSE	0.522868	1.43681	4.76694	8.95247e-06	0.00165298	29.2472	33.3756	31.2246	20.5305	22.2336	22.5286
ENSMUSG00000082110	Gm11196	FALSE	-3.26293	0.104174	-2.9111	9.32056e-06	0.00170391	0	0.0226736	0.0416605	0.188546	0.266005	0.215929
ENSMUSG00000033316	Galnt9	TRUE	1.85131	3.60827	-0.510653	9.96238e-06	0.00180339	1.59746	1.17903	1.02068	0.167596	0.465508	0.413865
ENSMUSG00000063902	Gm7964	TRUE	-0.408521	0.753395	5.81882	1.06945e-05	0.00191712	52.5583	48.5216	48.6178	67.1641	63.7747	67.7658
ENSMUSG00000051166	Eml5	TRUE	-0.517604	0.698531	7.21876	1.13556e-05	0.00201605	124.325	124.456	127.815	179.454	196.977	162.739
ENSMUSG00000057777	Mab21l2	TRUE	3.17736	9.0465	1.49508	1.18626e-05	0.002086	20.2147	1.7232	1.14566	0.775132	0.798015	0.971682
ENSMUSG00000033726	Emx1	TRUE	-0.903646	0.534534	5.112	1.35281e-05	0.00233032	18.2228	25.9386	27.0585	51.3892	46.8169	35.0345
ENSMUSG00000034903	Cobll1	TRUE	-0.625733	0.64809	3.45548	1.35243e-05	0.00233032	8.63809	8.16251	9.47777	13.282	14.3199	12.9738
ENSMUSG00000026158	Ogfrl1	TRUE	-0.520858	0.696957	4.81065	1.36306e-05	0.00233032	22.2066	23.9887	25.3088	34.3782	36.0215	32.2095
ENSMUSG00000080848	Gm9385	FALSE	-0.955714	0.515586	1.43946	1.42364e-05	0.00241157	2.01161	2.22202	2.08303	4.37845	4.21174	3.6708
ENSMUSG00000049409	Prokr1	TRUE	-0.889471	0.539812	3.34584	1.51377e-05	0.00251804	6.52787	6.21258	7.37391	13.68	12.3027	11.3003
ENSMUSG00000049932	H2afx	TRUE	-0.346572	0.78645	7.22021	1.50716e-05	0.00251804	116.792	137.561	130.647	173.713	152	163.746
ENSMUSG00000059974	Ntm	TRUE	-0.896517	0.537182	2.72413	1.56154e-05	0.0025743	5.06847	4.23997	4.70764	10.2443	8.26832	7.61151
ENSMUSG00000037035	Inhbb	TRUE	-2.05415	0.240791	-0.179035	1.59205e-05	0.00259033	0.177495	0.272084	0.604078	1.42457	1.97287	1.00767
ENSMUSG00000062432	Cyp26c1	TRUE	2.62663	6.1758	-2.0968	1.59931e-05	0.00259033	0.433877	0.408126	0.312454	0.0837981	0.0221671	0.0719765
ENSMUSG00000052229	Gpr17	TRUE	2.38919	5.23865	0.0389993	1.63322e-05	0.00262224	2.44549	1.56448	1.31231	0.314243	0.354673	0.341888
ENSMUSG00000024747	Aldh1a7	TRUE	2.9862	7.92384	0.179422	1.67006e-05	0.00265828	7.2773	0.657536	0.624908	0.335192	0.399007	0.341888
ENSMUSG00000097280	RP23-168E14.5	FALSE	-0.952074	0.516889	3.13714	1.71084e-05	0.0026969	4.55571	7.00616	6.62402	13.9733	11.7929	9.41092
ENSMUSG00000053279	Aldh1a1	TRUE	5.68417	51.4169	1.98647	1.72354e-05	0.0026969	43.9793	0.158716	0.104151	0.251394	0.332506	0.269912
ENSMUSG00000026817	Ak1	TRUE	0.71566	1.64223	3.68513	1.79748e-05	0.00278896	14.2391	17.5267	17.7474	11.1242	8.48999	10.5086
ENSMUSG00000087413	Gm11266	FALSE	-1.87472	0.27268	0.797909	1.91282e-05	0.00291887	0.690259	0.544167	1.12483	3.89661	3.21423	1.58348
ENSMUSG00000039714	Cplx3	TRUE	4.32627	20.0602	-2.1267	1.90765e-05	0.00291887	1.49885	0.113368	0.104151	0	0.0221671	0.0539824
ENSMUSG00000040952	Rps19	TRUE	0.494006	1.40835	9.21025	1.95e-05	0.00295122	628.53	707.078	681.92	473.208	465.841	493.471
ENSMUSG00000061330	Gm11361	FALSE	-1.31077	0.403107	0.887814	1.99082e-05	0.00298079	1.20302	1.56448	1.08317	4.08516	2.85955	2.60915
ENSMUSG00000023151	Lrrc69	TRUE	3.42524	10.7424	-2.85518	2.00183e-05	0.00298079	0.177495	0.181389	0.145812	0.0209495	0	0.0179941
ENSMUSG00000074607	Tox2	TRUE	0.700906	1.62553	4.71787	2.05038e-05	0.00302866	41.4944	31.6751	26.8085	18.2889	20.6819	22.5286
ENSMUSG00000021268	Meg3	FALSE	0.476639	1.3915	8.36377	2.08694e-05	0.0030547	457.661	369.014	366.529	265.158	298.657	293.7
ENSMUSG00000056380	Gpr50	TRUE	3.86836	14.6047	1.52585	2.1011e-05	0.0030547	12.2274	4.9882	3.08288	0.251394	0.665012	0.467847
ENSMUSG00000022548	Apod	TRUE	-1.14944	0.450799	4.61564	2.15781e-05	0.00308063	12.2077	16.6198	19.4138	47.1783	33.7161	26.1275
ENSMUSG00000082585	Gm15387	FALSE	-0.950886	0.517315	1.76065	2.14834e-05	0.00308063	2.24827	2.94757	2.54129	5.23738	5.36443	4.35458
ENSMUSG00000022048	Dpysl2	TRUE	-0.367212	0.775279	6.94144	2.16899e-05	0.00308063	104.762	119.808	115.858	142.603	150.315	146.148
ENSMUSG00000026556	Vangl2	TRUE	-0.325609	0.797961	7.73204	2.26826e-05	0.00319704	196.112	188.962	193.388	242.868	255.121	227.014
ENSMUSG00000031137	Fgf13	TRUE	-0.459628	0.727174	4.8022	2.32174e-05	0.00323153	23.5477	24.1248	24.4547	33.7078	33.2063	32.2814
ENSMUSG00000036019	Tmtc2	TRUE	0.725387	1.65334	3.87113	2.32774e-05	0.00323153	21.8319	18.1389	16.7475	11.0194	11.7929	11.4982
ENSMUSG00000039221	Rpl22l1	TRUE	0.679373	1.60144	6.79208	2.35698e-05	0.00324771	115.747	142.935	135.98	72.6739	88.1363	85.616
ENSMUSG00000034777	Vax2	TRUE	5.3962	42.1131	-1.83014	2.41457e-05	0.00330242	1.85384	0.136042	0.0624908	0	0.0443341	0
ENSMUSG00000028456	Unc13b	TRUE	-0.353121	0.782889	6.54019	2.54552e-05	0.00345591	86.2429	78.9496	79.9049	113.358	98.6213	101.127
ENSMUSG00000040152	Thbs1	TRUE	-0.558992	0.678776	7.34619	2.71573e-05	0.00366008	112.67	127.449	153.04	224.432	196.201	158.618
ENSMUSG00000051379	Flrt3	TRUE	-0.35015	0.784502	6.22433	2.77971e-05	0.00371918	67.7242	64.5292	70.6771	91.8217	85.7201	81.1895
ENSMUSG00000019913	Sim1	TRUE	2.44588	5.44856	1.5754	2.85531e-05	0.00379283	10.0186	4.80681	2.24967	0.670384	1.19702	1.25959
ENSMUSG00000033633	Clec18a	TRUE	3.71024	13.0886	-0.0127654	2.89979e-05	0.00382441	7.88867	0.272084	0.374945	0.230445	0.199504	0.215929
ENSMUSG00000015879	Fam184b	TRUE	-1.01323	0.495435	1.78233	2.98095e-05	0.00387608	2.11022	2.31271	2.33299	5.55162	4.41125	3.68879
ENSMUSG00000064655	Gm25788	FALSE	1.84778	3.59946	-1.58277	2.97964e-05	0.00387608	0.414155	0.24941	0.583247	0.104748	0.110835	0.125959
ENSMUSG00000021806	Nid2	TRUE	-0.401299	0.757176	6.18846	3.04388e-05	0.00393022	55.0629	63.7583	67.8442	83.9447	84.0132	78.5623
ENSMUSG00000066456	Hmgn3	TRUE	-0.340884	0.789558	6.01768	3.10168e-05	0.00397705	56.9956	60.4253	59.0955	73.847	75.5675	74.1358
ENSMUSG00000092203	1110038B12Rik	FALSE	0.379365	1.30077	6.8286	3.21346e-05	0.00406392	124.483	129.013	123.982	86.7938	99.8627	103.502
ENSMUSG00000097453	AC134530.1	FALSE	6.00129	64.0574	-3.36304	3.19805e-05	0.00406392	0.177495	0.113368	0.166642	0	0	0
ENSMUSG00000060419	Rps16-ps2	FALSE	-0.698865	0.616057	3.17231	3.24914e-05	0.0040811	6.94203	7.95845	7.2281	13.3029	12.7017	9.93275
ENSMUSG00000022881	Rfc4	TRUE	0.388716	1.30923	6.21091	3.32526e-05	0.00414848	77.0526	85.5703	81.3838	56.4589	62.5776	67.28
ENSMUSG00000058997	Vwa8	TRUE	-0.433268	0.740582	4.79842	3.44767e-05	0.00427233	23.4491	23.0591	22.33	31.4243	29.9034	31.6157
ENSMUSG00000026068	Il18rap	TRUE	-1.45648	0.36438	0.0674536	3.50982e-05	0.00432036	0.47332	0.49882	0.541587	1.63406	1.57386	0.971682
ENSMUSG00000020312	Shc2	TRUE	0.490462	1.4049	4.74459	3.57745e-05	0.00437444	36.209	31.6297	28.8707	22.1017	22.1227	24.598
ENSMUSG00000079641	Rpl39	TRUE	0.559615	1.47388	8.13322	3.61844e-05	0.00439545	303.438	329.403	347.22	211.192	225.35	228.399
ENSMUSG00000008575	Nfib	TRUE	-0.95072	0.517374	6.22183	3.65221e-05	0.00440747	44.8668	47.1839	63.0532	108.12	113.407	78.2924
ENSMUSG00000027831	Veph1	TRUE	-1.01937	0.493332	4.15677	3.75721e-05	0.00450475	10.0186	12.0397	14.1854	30.1464	25.869	17.4723
ENSMUSG00000030523	Trpm1	TRUE	3.93613	15.3071	2.13936	3.82002e-05	0.00455051	42.5002	1.04299	0.833211	1.21507	0.487676	1.18761
ENSMUSG00000085710	Gm12676	FALSE	-2.71032	0.152797	-2.57574	4.09586e-05	0.00481122	0.0394434	0	0.0416605	0.251394	0.199504	0.143953
ENSMUSG00000032698	Lmo2	TRUE	-0.650552	0.637036	4.99184	4.07562e-05	0.00481122	22.1474	24.3515	27.8292	46.0889	36.5757	34.0269
ENSMUSG00000004263	Atn1	TRUE	-0.366522	0.77565	7.09806	4.11706e-05	0.00481122	119.947	118.787	129.148	164.956	159.913	149.459
ENSMUSG00000064345	mt-Nd2	TRUE	-0.464531	0.724707	10.3529	4.24234e-05	0.00492645	1112.3	1216.12	1119.36	1437.09	1576.85	1743.49
ENSMUSG00000085794	Vax2os	FALSE	7.07889	135.194	-2.94545	4.28367e-05	0.00494336	0.926919	0.0453473	0	0	0	0
ENSMUSG00000053399	Adamts18	TRUE	-1.39832	0.379371	2.7573	4.50577e-05	0.00516737	4.65432	3.10629	3.66613	11.2708	11.2609	7.62951
ENSMUSG00000038156	Spon1	TRUE	2.33668	5.05138	3.16279	4.6233e-05	0.00526942	23.6463	12.6519	12.519	1.42457	4.45558	3.77876
ENSMUSG00000055799	Tcf7l1	TRUE	-0.415644	0.749685	5.73964	4.69435e-05	0.00531758	42.9538	44.6444	50.1593	58.1349	65.282	60.3523
ENSMUSG00000055254	Ntrk2	TRUE	-0.487228	0.713395	6.22559	4.74509e-05	0.00534227	52.4991	65.5042	66.9485	100.998	75.7005	82.521
ENSMUSG00000069806	Cacng7	TRUE	-0.308006	0.807757	6.42459	5.05685e-05	0.00565877	79.715	76.4555	80.009	96.9753	103.454	92.0399
ENSMUSG00000024518	Rax	TRUE	4.74884	26.887	-0.881445	5.09234e-05	0.00566415	3.90489	0.566841	0.104151	0.0837981	0.0443341	0.0359882
ENSMUSG00000057657	Rps18-ps3	TRUE	-1.81981	0.283259	-1.77508	5.19902e-05	0.00574819	0.157773	0.0680209	0.124982	0.523738	0.354673	0.395871
ENSMUSG00000086290	Snhg12	FALSE	0.483666	1.39829	4.31694	5.32197e-05	0.0058491	21.4177	24.7143	23.684	15.6074	16.4701	17.8142
ENSMUSG00000028402	Mpdz	TRUE	-0.31382	0.804509	7.5067	5.40209e-05	0.00590202	173.452	154.022	154.706	205.096	203.871	190.468
ENSMUSG00000031119	Gpc4	TRUE	-0.580339	0.668807	6.87369	5.76502e-05	0.00626149	86.0457	101.737	100.798	133.407	155.591	142.477
ENSMUSG00000057863	Rpl36	TRUE	0.405757	1.32478	8.09521	5.86086e-05	0.00632835	289.928	308.021	308.017	229.125	223.023	231.692
ENSMUSG00000026475	Rgs16	TRUE	0.385767	1.30655	5.50217	5.9532e-05	0.00635829	54.3135	50.993	52.3881	37.353	42.0509	41.2965
ENSMUSG00000008683	Rps15a	TRUE	0.418316	1.33637	9.38464	5.95745e-05	0.00635829	719.486	772.31	777.531	536.643	556.992	604.458
ENSMUSG00000060128	Gm10075	FALSE	-0.36222	0.777966	7.0459	6.04825e-05	0.0064181	115.786	122.188	123.961	147.715	164.502	153.022
ENSMUSG00000027175	Tcp11l1	TRUE	-0.451767	0.731147	4.64885	6.1705e-05	0.00651041	20.6289	21.8574	22.8508	29.3293	31.0339	29.0065
ENSMUSG00000027864	Ptgfrn	TRUE	-0.308997	0.807203	7.32568	6.38936e-05	0.00670302	130.853	137.765	147.666	183.413	167.916	164.394
ENSMUSG00000040289	Hey1	TRUE	-0.456788	0.728606	5.87221	6.59672e-05	0.00688146	40.6267	55.7998	53.8462	70.9141	73.3065	62.0077
ENSMUSG00000028782	Bai2	TRUE	-0.700651	0.615295	5.05069	6.74591e-05	0.00699756	21.4177	27.8886	28.6208	46.6965	40.5879	39.3531
ENSMUSG00000069008	Gm5537	FALSE	-2.24661	0.210718	-2.04789	7.59174e-05	0.00767678	0.0788867	0.158716	0.0833211	0.628485	0.53201	0.377876
ENSMUSG00000036437	Npy1r	TRUE	-1.96796	0.255614	-0.263692	7.60067e-05	0.00767678	0.276103	0.204063	0.583247	2.1578	1.39653	0.647788
ENSMUSG00000080242	Gm15487	FALSE	-1.34984	0.392335	-0.420742	7.72781e-05	0.00767678	0.256382	0.634862	0.437436	1.34077	1.28569	0.755753
ENSMUSG00000020473	Aebp1	TRUE	-1.32704	0.398585	4.66838	7.64051e-05	0.00767678	11.4583	12.5612	18.7056	47.3459	37.5954	22.2767
ENSMUSG00000028519	Dab1	TRUE	-0.678228	0.624933	5.54211	7.73223e-05	0.00767678	33.4085	35.0761	37.4736	53.6308	65.2377	50.7074
ENSMUSG00000016028	Celsr1	TRUE	-0.435946	0.739209	6.5666	7.73332e-05	0.00767678	84.4877	75.8433	75.6972	123.267	101.547	94.5411
ENSMUSG00000005779	Psmb4	TRUE	0.317476	1.24615	7.28405	7.48845e-05	0.00767678	160.219	177.535	166.038	136.968	128.68	138.573
ENSMUSG00000094411	Snord16a	FALSE	1.54019	2.90833	-0.331058	7.56674e-05	0.00767678	1.10441	0.952293	1.35397	0.398041	0.354673	0.413865
ENSMUSG00000031790	Mmp15	TRUE	-0.351972	0.783513	5.63158	7.92879e-05	0.00782873	42.7763	45.4607	42.9103	58.9729	55.0408	53.3706
ENSMUSG00000049830	Gm9839	FALSE	3.15733	8.92178	-2.0731	7.98527e-05	0.00784255	0.197217	0.24941	0.145812	0	0	0.0539824
ENSMUSG00000081485	Gm12338	FALSE	-1.1575	0.448288	0.447513	8.24624e-05	0.00805601	0.867754	1.06566	0.854041	2.1159	2.57138	1.54749
ENSMUSG00000019789	Hey2	TRUE	-0.893796	0.538196	2.16536	8.30551e-05	0.00806496	3.98378	3.21966	3.27035	8.4636	5.5196	5.5062
ENSMUSG00000021756	Il6st	TRUE	-0.464849	0.724547	6.68026	8.34276e-05	0.00806496	91.1536	85.1169	89.5493	145.117	116.71	105.104
ENSMUSG00000058905	Gm10051	FALSE	-1.83439	0.28041	-1.30223	8.71653e-05	0.00836875	0.256382	0.181389	0.208303	1.13127	0.798015	0.413865
ENSMUSG00000029860	Zyx	TRUE	-0.355251	0.781734	6.23205	8.74767e-05	0.00836875	63.3657	65.7762	71.0937	92.8063	80.5995	82.737
ENSMUSG00000018501	Ncor1	TRUE	-0.321667	0.800145	8.34224	9.13421e-05	0.00864892	313.299	282.378	290.374	364.794	385.907	356.733
ENSMUSG00000021596	Mctp1	TRUE	1.45345	2.73863	1.20249	9.10808e-05	0.00864892	2.8202	3.17431	3.22869	0.649435	0.931017	1.76342
ENSMUSG00000081855	Rpl17-ps5	FALSE	-1.4018	0.378456	-0.852702	9.21924e-05	0.00865074	0.23666	0.294757	0.437436	1.23602	0.576344	0.755753
ENSMUSG00000039830	Olig2	TRUE	1.45123	2.73441	4.36519	9.22983e-05	0.00865074	31.2786	34.1012	28.8707	6.99714	14.5638	12.9018
ENSMUSG00000071856	Mcc	TRUE	-0.633345	0.64468	3.61493	9.43407e-05	0.00866621	9.42696	10.5206	11.5191	17.8071	14.8519	16.1407
ENSMUSG00000069170	Gpr98	TRUE	0.648476	1.56751	6.02123	9.32289e-05	0.00866621	105.925	76.0021	72.7393	56.857	44.3563	61.234
ENSMUSG00000085912	Trp53cor1	FALSE	1.32932	2.51284	0.106648	9.38836e-05	0.00866621	1.14386	1.51913	1.83306	0.460889	0.731513	0.593806
ENSMUSG00000053963	6330403A02Rik	TRUE	2.65228	6.28658	2.5547	9.37014e-05	0.00866621	16.1126	11.1328	4.45768	1.34077	0.554177	3.13098
ENSMUSG00000026042	Col5a2	TRUE	-0.467842	0.723045	7.02984	9.52343e-05	0.00870498	103.243	104.253	105.714	179.977	124.202	129.018
ENSMUSG00000068749	Psma5	TRUE	0.374717	1.29659	7.18929	9.66132e-05	0.00878752	151.403	167.014	158.622	116.542	123.005	128.334
ENSMUSG00000051817	Sox12	TRUE	-0.319952	0.801096	7.43309	9.83282e-05	0.00889967	149.333	157.65	160.81	196.444	191.878	195.596
ENSMUSG00000020721	Helz	TRUE	-0.298297	0.813212	6.34093	9.89652e-05	0.00891363	79.5375	69.1773	73.26	91.0466	94.1436	87.8653
ENSMUSG00000047786	Lix1	TRUE	-0.35518	0.781772	6.43396	0.000100514	0.00900921	74.1141	75.2992	76.0096	94.5661	102.789	91.0322
ENSMUSG00000025369	Smarcc2	TRUE	-0.424514	0.745089	8.05365	0.000104191	0.00925693	232.4	210.185	238.277	312.085	323.772	278.009
ENSMUSG00000028370	Pappa	TRUE	0.58736	1.50249	5.26054	0.000104281	0.00925693	48.6731	42.6491	44.431	22.4788	37.4845	30.4101
ENSMUSG00000008668	Rps18	TRUE	0.467007	1.38224	9.60572	0.000105261	0.0092969	832.59	909.213	871.476	600.79	608.996	680.789
ENSMUSG00000022454	Nell2	TRUE	0.547967	1.46202	5.94344	0.000105738	0.0092969	90.1083	67.5675	57.4082	43.8054	53.6665	49.6638
ENSMUSG00000048747	E130114P18Rik	TRUE	-1.25031	0.420358	4.29904	0.000108722	0.00951392	10.8469	10.2938	14.4979	30.9215	34.1151	19.7755
ENSMUSG00000024500	Ppp2r2b	TRUE	-1.44422	0.367492	2.97729	0.000109288	0.0095184	3.86545	4.67077	4.49934	15.0208	12.8569	7.61151
ENSMUSG00000027692	Tnik	TRUE	-0.645781	0.639147	4.914	0.000111648	0.00967822	23.666	21.3359	25.767	42.3599	37.0412	31.3637
ENSMUSG00000091318	Gm5415	TRUE	2.182	4.53781	-0.960361	0.000112604	0.00971549	0.493042	0.838925	0.666568	0.0837981	0.0886683	0.251918
ENSMUSG00000044674	Fzd1	TRUE	-0.408924	0.753185	6.102	0.000117813	0.0101177	59.6384	57.5911	57.3041	86.5843	69.7154	75.4313
ENSMUSG00000094272	Gm22292	FALSE	-2.97167	0.127479	-3.26887	0.000121735	0.0102169	0.0197217	0.0226736	0.0208303	0.167596	0.177337	0.197935
ENSMUSG00000027004	Frzb	TRUE	-0.742709	0.597616	4.57219	0.000120127	0.0102169	14.0221	19.0005	21.8509	37.4787	27.8862	26.4514
ENSMUSG00000038034	Igsf8	TRUE	-0.590316	0.664197	5.8625	0.000121469	0.0102169	43.2694	46.0955	48.2637	81.5146	65.5037	60.2083
ENSMUSG00000057278	Snrpg	TRUE	0.410511	1.32916	6.9825	0.000120646	0.0102169	130.952	142.844	138.125	99.0912	104.363	106.435
ENSMUSG00000025283	Sat1	TRUE	0.42168	1.33949	4.34494	0.000120986	0.0102169	24.021	22.2882	22.955	17.7861	16.5588	17.3643
ENSMUSG00000056306	Sertm1	TRUE	-1.20835	0.432764	2.74177	0.000124053	0.010232	3.11602	4.5574	4.89511	15.0208	6.51712	7.50355
ENSMUSG00000049939	Lrrc4	TRUE	-0.522421	0.696203	4.31606	0.000123834	0.010232	14.1799	15.7809	17.3933	22.395	24.6941	20.9452
ENSMUSG00000085925	Rtl1	TRUE	1.09513	2.13632	1.64082	0.000124132	0.010232	5.40374	3.6958	3.74945	1.9483	1.8842	2.17729
ENSMUSG00000026208	Des	TRUE	1.21757	2.32555	0.572516	0.000122961	0.010232	2.07078	2.33539	2.39548	0.754182	0.798015	1.34956
ENSMUSG00000092281	Hmg1l1	FALSE	-1.01972	0.493211	0.71136	0.000127159	0.0103494	1.1833	1.11101	1.16649	2.17875	2.54921	2.30325
ENSMUSG00000073678	Pgap1	TRUE	-0.370619	0.773451	6.39914	0.000127238	0.0103494	76.0468	71.3993	76.5512	95.7812	101.259	92.6157
ENSMUSG00000089855	Gm15662	FALSE	1.61131	3.05529	-0.983559	0.000126858	0.0103494	0.611372	0.838925	0.833211	0.335192	0.110835	0.287906
ENSMUSG00000026826	Nr4a2	TRUE	-0.618577	0.651313	4.54127	0.000132365	0.0107192	17.6706	20.1569	20.8511	38.3586	24.3394	27.387
ENSMUSG00000056211	R3hdm1	TRUE	-0.255386	0.837763	6.95916	0.000134386	0.0108354	118.389	114.729	114.941	134.622	144.13	136.755
ENSMUSG00000068744	Psrc1	TRUE	0.280676	1.21476	6.69572	0.000137934	0.0110731	105.294	117.654	111.65	87.4433	94.1879	93.7673
ENSMUSG00000004328	Hif3a	TRUE	-0.862897	0.549847	4.0535	0.000140751	0.0112092	11.833	11.2688	15.1228	28.4285	23.2533	17.8682
ENSMUSG00000037578	Pkd2l1	TRUE	2.54673	5.84308	-2.34655	0.000140843	0.0112092	0.532485	0.158716	0.166642	0.041899	0.0665012	0.0359882
ENSMUSG00000051428	Gm5644	FALSE	-0.864216	0.549345	1.51167	0.000145366	0.0114165	2.26799	1.83657	2.49963	4.08516	4.16741	3.79676
ENSMUSG00000020027	Socs2	TRUE	-0.605007	0.657468	4.63513	0.000146675	0.0114165	17.3156	21.4493	22.2467	33.4354	30.1472	29.2045
ENSMUSG00000069744	Psmb3	TRUE	0.315254	1.24423	6.95604	0.000147158	0.0114165	130.084	140.939	133.126	109.524	103.808	111.438
ENSMUSG00000022503	Nubp1	TRUE	0.398627	1.31825	4.44814	0.000144094	0.0114165	24.2379	24.7143	23.0174	17.9747	18.6647	17.9581
ENSMUSG00000079022	Col22a1	TRUE	0.548921	1.46299	3.90348	0.000147137	0.0114165	19.2878	17.7535	16.4559	11.3337	11.8816	13.3336
ENSMUSG00000089651	Gm16353	FALSE	1.93237	3.81681	-1.93378	0.000146079	0.0114165	0.197217	0.272084	0.479096	0.104748	0.0665012	0.0719765
ENSMUSG00000039001	Rps21	TRUE	0.441425	1.35794	8.22185	0.000148838	0.0114985	324.698	348.517	345.887	246.324	251.175	252.961
ENSMUSG00000039323	Igfbp2	TRUE	-0.532496	0.691358	8.07528	0.000150381	0.0115693	185.68	242.563	231.778	367.748	282.431	304.46
ENSMUSG00000021466	Ptch1	TRUE	1.07178	2.10202	5.83267	0.000153133	0.0117322	115.234	69.0866	64.6571	36.1379	38.0387	44.2655
ENSMUSG00000043753	Dmrta1	TRUE	-0.575009	0.671282	5.81006	0.000155459	0.0118124	38.5362	47.592	48.1804	64.6921	73.8828	61.5039
ENSMUSG00000038602	Slc35f1	TRUE	-0.556297	0.680046	6.22946	0.000154947	0.0118124	54.9446	61.0374	64.8863	85.9349	102.323	77.7346
ENSMUSG00000025858	Get4	TRUE	0.351257	1.27567	5.77645	0.000158928	0.0120264	57.1929	61.4682	58.4497	44.9367	45.9302	47.9363
ENSMUSG00000022193	Psmb5	TRUE	0.314819	1.24386	6.00729	0.00016261	0.0122548	67.5665	73.6893	69.0523	57.276	53.4448	58.3009
ENSMUSG00000026155	Smap1	TRUE	-0.451595	0.731234	4.69115	0.000163821	0.0122959	24.1196	21.9027	22.8925	31.8223	32.5191	29.9422
ENSMUSG00000067575	Rpl35a-ps3	FALSE	-2.57276	0.168082	-1.9838	0.000170569	0.0127406	0.059165	0.158716	0.0208303	0.481839	0.443341	0.503835
ENSMUSG00000044600	Smim7	TRUE	0.340908	1.26655	6.50649	0.000171126	0.0127406	97.2673	99.9908	99.0896	74.8945	78.6488	80.4157
ENSMUSG00000063316	Rpl27	TRUE	0.39937	1.31893	8.16548	0.000172523	0.012793	296.89	335.933	325.285	238.468	237.808	250.118
ENSMUSG00000024552	Slc14a2	TRUE	-1.64492	0.319765	-0.229697	0.000176693	0.0129597	0.23666	0.294757	0.687399	1.75976	1.39653	0.683776
ENSMUSG00000062939	Stat4	TRUE	-0.789684	0.578471	4.05892	0.000176457	0.0129597	8.69726	13.1961	13.8938	15.5026	25.204	21.1431
ENSMUSG00000042406	Atf4	TRUE	0.300533	1.2316	7.65733	0.000178151	0.0129597	204.77	237.37	233.82	175.515	176.672	196.568
ENSMUSG00000056972	Magel2	TRUE	0.765936	1.70047	3.3735	0.000178019	0.0129597	15.9548	11.6316	14.1646	6.95524	9.95301	7.66549
ENSMUSG00000025359	Pmel	TRUE	3.53516	11.5928	1.62899	0.00017828	0.0129597	27.3342	0.49882	0.520757	0.984627	0.554177	0.899706
ENSMUSG00000031250	Tnmd	TRUE	-3.52042	0.0871461	-3.00306	0.000179676	0.0130099	0.0197217	0	0.0208303	0.293293	0.177337	0.0899706
ENSMUSG00000001911	Nfix	TRUE	-1.80606	0.28597	3.84602	0.000180922	0.0130263	4.61487	6.05386	9.81105	28.1771	27.8418	15.6189
ENSMUSG00000022687	Boc	TRUE	-0.476213	0.718862	6.67366	0.000181313	0.0130263	70.7022	86.5226	91.2157	112.813	127.837	104.96
ENSMUSG00000000567	Sox9	TRUE	-0.547418	0.684244	6.7134	0.000184479	0.0132024	76.1257	95.9775	94.0278	117.464	149.295	122.18
ENSMUSG00000061979	Wbscr16	TRUE	0.432501	1.34957	4.89469	0.000186569	0.0133004	31.673	34.3052	33.3284	24.2176	23.1646	26.1634
ENSMUSG00000046598	Bdh1	TRUE	-0.457958	0.728016	4.45973	0.000188692	0.0134	18.3412	18.6151	16.9558	24.5109	26.9552	22.6186
ENSMUSG00000004151	Etv1	TRUE	-0.648668	0.637869	4.28108	0.00019063	0.0134858	13.0755	14.8286	17.7266	22.814	28.3073	20.4413
ENSMUSG00000018585	Atox1	TRUE	0.466145	1.38141	4.81738	0.000193213	0.0136163	30.1347	32.7407	31.0579	23.5054	21.8789	22.6006
ENSMUSG00000030306	Tmtc1	TRUE	-0.713927	0.609658	2.13675	0.00019608	0.0137137	2.8202	3.53709	3.77028	5.97061	5.12059	5.5062
ENSMUSG00000021613	Hapln1	TRUE	-0.41954	0.747663	6.39689	0.000196023	0.0137137	61.1372	78.5415	81.5713	103.512	98.3996	93.9833
ENSMUSG00000097391	Mirg	FALSE	0.67378	1.59525	4.53499	0.000197779	0.0137804	33.3691	29.0903	24.6839	15.9845	19.241	19.3977
ENSMUSG00000001300	Efnb2	TRUE	-0.538818	0.688334	7.66183	0.000199492	0.0137956	134.955	169.485	182.411	225.501	265.828	215.965
ENSMUSG00000010797	Wnt2	TRUE	5.81844	56.4319	-3.46542	0.00019913	0.0137956	0.35499	0.0226736	0.0208303	0	0	0
ENSMUSG00000023192	Grm2	TRUE	1.55416	2.93663	0.0977619	0.000203152	0.0139963	3.03714	1.65518	0.874871	0.481839	0.576344	0.827729
ENSMUSG00000020102	Slc16a7	TRUE	-0.786421	0.579781	1.65822	0.000205221	0.014068	2.32716	2.38073	2.70793	4.71364	4.27824	3.81475
ENSMUSG00000016252	Atp5e	TRUE	0.369729	1.29211	6.48224	0.000205717	0.014068	91.5283	96.5897	101.693	79.4406	73.3508	71.5086
ENSMUSG00000071867	Gm6304	FALSE	-1.68818	0.310318	-1.56475	0.000209743	0.0142379	0.197217	0.136042	0.208303	0.837981	0.620678	0.323894
ENSMUSG00000036943	Rab8b	TRUE	-0.340526	0.789753	6.64544	0.000209359	0.0142379	84.7046	91.6922	91.9864	112.227	119.148	108.469
ENSMUSG00000031302	Nlgn3	TRUE	-0.672594	0.627378	3.22708	0.000214922	0.0145176	7.31674	7.45963	8.91535	12.9258	13.9431	10.9224
ENSMUSG00000021767	Kat6b	TRUE	-0.62434	0.648717	7.0623	0.000215969	0.0145176	108.943	98.449	112.942	176.269	181.881	135.694
ENSMUSG00000001930	Vwf	TRUE	0.66371	1.58415	3.6887	0.000216223	0.0145176	18.5384	14.3751	16.6642	12.9258	9.99735	8.40325
ENSMUSG00000087480	Gm15910	FALSE	-0.868959	0.547542	1.67255	0.000222441	0.014881	2.05105	2.47143	2.31216	4.92314	4.16741	3.40089
ENSMUSG00000070720	Tmem200b	TRUE	0.991494	1.98824	1.21431	0.000224938	0.0149937	3.2738	2.99292	2.9579	1.48742	1.13052	1.99735
ENSMUSG00000024325	Ring1	TRUE	0.415188	1.33347	5.77955	0.000226113	0.0150178	67.527	57.0015	58.0748	44.7272	46.8169	45.4172
ENSMUSG00000020902	Ntn1	TRUE	0.667114	1.58789	5.4652	0.000227135	0.0150316	58.7903	51.1064	46.6806	26.7735	39.8564	31.9935
ENSMUSG00000038070	Cntln	TRUE	-0.427131	0.743739	5.44818	0.000230184	0.015179	38.2995	36.0738	38.7026	54.9087	52.0705	45.1113
ENSMUSG00000042082	Arsb	TRUE	-0.601002	0.659296	2.8545	0.000232891	0.0152602	5.87706	5.44167	6.04078	9.44823	8.09098	8.79912
ENSMUSG00000052368	Gm9873	FALSE	1.36776	2.58069	-1.06072	0.000233069	0.0152602	0.670537	1.02031	0.666568	0.293293	0.266005	0.341888
ENSMUSG00000059173	Pde1a	TRUE	-1.12144	0.459636	1.25135	0.000234103	0.0152737	1.06497	1.60983	1.91638	3.74996	3.85707	2.39322
ENSMUSG00000015776	Med22	TRUE	0.321982	1.25005	6.46387	0.000237115	0.0154158	93.1652	99.8094	93.1946	76.4867	72.4198	79.9659
ENSMUSG00000046997	Spsb4	TRUE	0.419501	1.33747	5.67872	0.00023941	0.0155104	62.2219	58.7474	51.6174	37.9815	43.0706	47.9543
ENSMUSG00000026483	Fam129a	TRUE	-1.57961	0.334572	1.05018	0.00024095	0.0155556	1.75523	0.861598	1.02068	4.71364	3.5024	2.69912
ENSMUSG00000074274	D930028M14Rik	TRUE	2.23859	4.71935	1.65552	0.000243493	0.015665	7.92811	5.94049	3.83277	0.377091	1.72903	1.63746
ENSMUSG00000058761	Rnf169	TRUE	0.26228	1.19937	6.19586	0.000246104	0.0156718	80.9969	81.1943	83.3211	66.7033	70.8681	67.154
ENSMUSG00000022385	Gtse1	TRUE	0.274054	1.2092	6.30331	0.000246145	0.0156718	81.49	88.1098	84.4251	67.4784	68.1859	74.3337
ENSMUSG00000040478	Prdm13	TRUE	1.79425	3.46834	-1.73279	0.000244687	0.0156718	0.788867	0.521494	0.249963	0.188546	0.133002	0.125959
ENSMUSG00000047496	Rnf152	TRUE	-0.547255	0.684321	4.11999	0.000247683	0.0157155	12.5233	15.1006	15.4352	21.8503	22.5661	18.5159
ENSMUSG00000029009	Mthfr	TRUE	0.265785	1.20229	6.13569	0.000250336	0.0157754	72.773	75.2765	77.9885	60.8793	61.7796	65.3007
ENSMUSG00000030641	4632434I11Rik	TRUE	0.379037	1.30047	5.3	0.000249894	0.0157754	42.8946	49.0658	43.4728	32.8698	32.7629	38.4354
ENSMUSG00000045506	A930002H24Rik	TRUE	-1.36716	0.387653	-1.45823	0.000262672	0.0159539	0.197217	0.181389	0.166642	0.502788	0.509843	0.413865
ENSMUSG00000048387	Osr1	TRUE	-1.36581	0.388015	1.14175	0.00026262	0.0159539	1.67634	1.38309	1.39563	6.36865	2.32754	2.80708
ENSMUSG00000024697	Gna14	TRUE	-0.803486	0.572963	1.64687	0.000259771	0.0159539	2.0905	2.22202	2.20801	3.70806	4.56642	3.13098
ENSMUSG00000026657	Frmd4a	TRUE	-0.357662	0.780428	7.24432	0.000261559	0.0159539	128.013	130.056	139.938	174.07	178.6	157.359
ENSMUSG00000076437	2700094K13Rik	TRUE	0.286775	1.21991	7.40286	0.000261318	0.0159539	170.652	191.275	181.723	142.834	147.677	155.073
ENSMUSG00000059534	Uqcr10	TRUE	0.388623	1.30914	5.93451	0.000258739	0.0159539	65.5154	66.7512	64.4072	48.3096	50.4079	51.4992
ENSMUSG00000004085	B230120H23Rik	TRUE	0.425398	1.34294	4.57099	0.000260627	0.0159539	28.34	29.3624	27.6209	21.7456	18.709	23.0325
ENSMUSG00000047215	Rpl9	TRUE	0.429602	1.34686	9.50896	0.000262287	0.0159539	773.149	855.953	829.315	599.051	599.752	626.465
ENSMUSG00000002059	Rab34	TRUE	0.510665	1.42471	4.90169	0.000262232	0.0159539	37.8262	34.4413	32.9118	24.8252	23.0759	25.9115
ENSMUSG00000065589	Mir301	FALSE	1.08318	2.1187	-0.00964483	0.000259782	0.0159539	1.22274	1.31507	1.18733	0.502788	0.598511	0.647788
ENSMUSG00000030092	Cntn6	TRUE	1.42934	2.69323	1.49246	0.000257968	0.0159539	6.21233	4.46671	2.89541	1.71786	1.13052	2.17729
ENSMUSG00000024172	St6gal2	TRUE	-0.626411	0.647786	4.85675	0.00026668	0.0161442	23.3899	20.9731	22.4134	35.0485	41.1199	26.9732
ENSMUSG00000050783	Htr1f	TRUE	-3.05486	0.120336	-2.54676	0.000269618	0.0162687	0	0.0453473	0.0416605	0.377091	0.221671	0.161947
ENSMUSG00000041380	Htr2c	TRUE	-4.00167	0.0624278	-3.01552	0.000273385	0.0164124	0.0197217	0	0	0.272344	0.0443341	0.125959
ENSMUSG00000037062	Sh3glb1	TRUE	-0.274728	0.826606	6.47309	0.000273777	0.0164124	85.099	79.9246	82.592	100.264	102.434	96.9163
ENSMUSG00000031626	Sorbs2	TRUE	-0.573018	0.672209	6.41497	0.000275428	0.0164579	67.4679	64.6199	73.4683	106.214	113.34	86.2818
ENSMUSG00000008682	Rpl10	TRUE	0.419677	1.33763	9.77126	0.00027894	0.0165604	955.042	988.662	955.505	687.961	694.361	785.065
ENSMUSG00000021028	Mbip	TRUE	0.583694	1.49868	5.09467	0.000278746	0.0165604	33.3494	44.5084	44.8684	23.1492	30.6571	28.0708
ENSMUSG00000020848	Doc2b	TRUE	1.17848	2.26338	-0.554504	0.000279834	0.0165604	1.10441	0.99764	0.854041	0.41899	0.332506	0.539824
ENSMUSG00000070729	Gm12966	FALSE	-0.828742	0.56302	1.68431	0.000285907	0.0166338	2.66243	2.24469	2.83292	4.73459	4.92109	4.12065
ENSMUSG00000040022	Rab11fip2	TRUE	-0.417285	0.748833	5.38185	0.000285469	0.0166338	35.1637	34.7814	37.5778	48.7705	51.9153	42.952
ENSMUSG00000027472	Pdrg1	TRUE	0.336169	1.2624	5.4706	0.00028407	0.0166338	47.5292	47.3652	50.4092	38.8404	38.482	37.7876
ENSMUSG00000097188	AC025794.1	FALSE	0.409064	1.32782	6.24643	0.000286478	0.0166338	81.0561	90.3771	85.9873	58.8681	67.7869	67.19
ENSMUSG00000048001	Hes5	TRUE	0.531843	1.44578	4.98598	0.000284502	0.0166338	35.5976	40.223	36.7029	27.0458	27.0217	23.7702
ENSMUSG00000060600	Eno3	TRUE	0.568189	1.48266	4.34788	0.000283765	0.0166338	25.8157	25.5985	24.4964	16.6968	15.4726	19.0018
ENSMUSG00000060735	Rxfp3	TRUE	-2.52244	0.174049	0.0892623	0.000289888	0.016762	0.23666	0.294757	0.541587	3.54047	1.8177	0.845724
ENSMUSG00000042671	Rgs8	TRUE	0.450246	1.36627	5.33433	0.000290786	0.016762	54.3529	43.8508	43.3269	31.8433	36.3318	35.4304
ENSMUSG00000086859	2810008D09Rik	FALSE	0.51959	1.43355	3.70457	0.000291446	0.016762	14.0418	15.9622	15.3936	10.4329	10.4407	10.7785
ENSMUSG00000092029	Gm9027	FALSE	1.22171	2.33223	1.13251	0.000292319	0.016762	3.13575	2.74351	2.62461	1.13127	1.06402	1.43953
ENSMUSG00000023495	Pcbp4	TRUE	0.292893	1.22509	8.28312	0.000295487	0.0168912	334.677	358.674	317.62	268.468	267.667	289.022
ENSMUSG00000039114	Nrn1	TRUE	-0.885841	0.541172	4.37907	0.000300666	0.0171342	13.9432	13.6495	16.9975	36.6616	25.1375	20.6213
ENSMUSG00000028383	Hsdl2	TRUE	-0.420494	0.747169	4.53143	0.000302488	0.017185	18.9328	20.0435	20.2887	26.7735	27.4207	25.1378
ENSMUSG00000064325	Hhip	TRUE	2.46333	5.5149	0.0276802	0.000308574	0.017477	3.90489	1.08833	0.645738	0.335192	0.266005	0.413865
ENSMUSG00000030507	Dbx1	TRUE	1.3637	2.57344	2.40546	0.00031056	0.0175357	17.1381	4.58008	5.41587	4.29465	3.21423	3.04101
ENSMUSG00000020812	1810032O08Rik	TRUE	0.578728	1.49353	3.39937	0.000313341	0.0176388	11.9119	12.0851	11.9357	8.08651	8.09098	7.88142
ENSMUSG00000074797	Itpa	TRUE	0.293329	1.22546	6.72045	0.000315197	0.0176894	108.43	121.962	115.004	93.372	89.3776	99.0216
ENSMUSG00000027820	Mme	TRUE	-0.621666	0.64992	5.00041	0.000318612	0.0178268	24.0999	27.1177	30.0164	57.9254	31.1669	35.8983
ENSMUSG00000003873	Bax	TRUE	0.281513	1.21547	6.10554	0.000320577	0.0178826	68.947	79.5618	78.2801	63.2256	61.824	61.5039
ENSMUSG00000022707	Gbe1	TRUE	-0.424846	0.744918	4.83773	0.000325958	0.018128	21.7333	25.5532	24.2881	30.3977	35.3121	30.3741
ENSMUSG00000040181	Fmo1	TRUE	-0.805134	0.572309	2.9639	0.000335008	0.0184668	6.21233	5.78178	6.14493	15.1255	8.11315	8.47523
ENSMUSG00000022150	Dab2	TRUE	-0.465803	0.724068	6.18181	0.00033505	0.0184668	60.7822	64.0757	67.0943	110.781	79.0921	75.2514
ENSMUSG00000020580	Rock2	TRUE	-0.233117	0.850795	6.92384	0.000334367	0.0184668	115.727	111.396	112.983	131.102	136.904	131.789
ENSMUSG00000041841	Rpl37	TRUE	0.353521	1.27768	8.32121	0.000336878	0.0185122	337.004	362.552	354.864	268.112	273.231	283.893
ENSMUSG00000056708	Ier5	TRUE	-0.4084	0.753458	5.43539	0.000340743	0.0185388	32.7971	39.0213	40.3274	51.9757	52.669	44.2115
ENSMUSG00000019817	Plagl1	TRUE	-0.366484	0.775671	8.9526	0.000339873	0.0185388	481.564	432.273	434.061	539.282	654.926	543.584
ENSMUSG00000061524	Zic2	TRUE	-0.345718	0.786916	6.43034	0.000341377	0.0185388	70.0514	77.8159	81.4463	108.058	87.7151	95.6027
ENSMUSG00000096225	Lhx8	TRUE	3.41687	10.6802	1.32029	0.000341349	0.0185388	0.749424	6.96081	7.64471	0.188546	0.775847	0.467847
ENSMUSG00000064871	Snord58b	FALSE	1.21551	2.32222	-0.42212	0.000344389	0.0186475	1.06497	0.74823	1.08317	0.377091	0.37684	0.485841
ENSMUSG00000048251	Bcl11b	TRUE	-0.732068	0.60204	5.3256	0.00035215	0.0189052	27.4526	31.403	33.6825	53.924	57.9669	41.8363
ENSMUSG00000037103	Dcaf15	TRUE	0.274609	1.20967	6.32366	0.000352083	0.0189052	88.8462	81.8745	82.6961	67.9183	70.4913	71.0948
ENSMUSG00000004268	Emg1	TRUE	0.279497	1.21377	6.93403	0.000352413	0.0189052	127.382	133.82	129.398	104.454	103.964	113.327
ENSMUSG00000005994	Tyrp1	TRUE	4.7148	26.2601	-1.73921	0.000353243	0.0189052	2.8202	0.0453473	0	0.0628485	0.0221671	0.0179941
ENSMUSG00000014602	Kif1a	TRUE	-0.467059	0.723438	7.28478	0.000359397	0.0190687	128.013	118.742	133.21	176.877	196.156	152.248
ENSMUSG00000070493	Chchd2	TRUE	0.337212	1.26331	7.0927	0.000358656	0.0190687	137.578	160.529	146.916	116.144	119.082	117.016
ENSMUSG00000028681	Ptch2	TRUE	1.05715	2.08082	3.1917	0.000357973	0.0190687	15.659	10.6566	12.5398	5.09073	6.25111	7.32361
ENSMUSG00000091722	Siah3	TRUE	-1.74908	0.297492	1.17567	0.000363769	0.0191015	0.986084	0.680209	1.43729	4.56699	3.52456	2.37522
ENSMUSG00000052516	Robo2	TRUE	-0.733964	0.60125	5.12985	0.000361104	0.0191015	27.4526	23.9434	26.5169	48.7705	46.1962	34.6567
ENSMUSG00000085555	2610035F20Rik	FALSE	-0.697438	0.616666	3.90435	0.000362344	0.0191015	10.2947	12.3345	13.6438	22.6464	16.0933	20.0634
ENSMUSG00000004568	Arhgef18	TRUE	0.514565	1.42856	5.34378	0.000364154	0.0191015	27.8273	45.3473	46.9514	29.3084	27.4207	27.3331
ENSMUSG00000064125	BC068157	TRUE	-0.437811	0.738254	5.87194	0.000366754	0.0191834	51.2961	46.2769	52.3673	68.044	72.9962	62.1157
ENSMUSG00000058669	Nkx2-9	TRUE	4.11828	17.367	-1.5408	0.000369401	0.0192673	1.3608	0.272084	0.249963	0	0.0665012	0.0359882
ENSMUSG00000010175	Prox1	TRUE	0.683447	1.60597	3.7685	0.000375046	0.0195066	23.9816	15.3954	14.2687	10.4748	11.6599	11.2823
ENSMUSG00000052397	Ezr	TRUE	-0.62022	0.650572	7.44107	0.000384319	0.0199328	118.093	149.941	152.457	279.362	165.477	201.48
ENSMUSG00000096842	Gm10736	FALSE	0.381803	1.30297	7.05988	0.000387533	0.0200432	142.765	144.567	158.248	106.549	113.939	121.46
ENSMUSG00000027434	Nkx2-2	TRUE	5.42264	42.8921	0.141449	0.00039488	0.0203661	7.25758	0.725557	0.437436	0.041899	0	0.143953
ENSMUSG00000036985	Zdhhc9	TRUE	-0.341166	0.789403	5.13504	0.000411732	0.0211761	32.2055	28.8409	32.7035	40.244	40.2776	38.2915
ENSMUSG00000000120	Ngfr	TRUE	0.677098	1.59892	3.7504	0.000427063	0.0219036	22.5419	16.4837	13.8521	10.8937	9.42101	12.7398
ENSMUSG00000022887	Masp1	TRUE	-1.3608	0.389366	2.75707	0.000434867	0.0220976	3.58935	2.67549	4.83262	12.9258	9.79785	5.8121
ENSMUSG00000036446	Lum	TRUE	-0.629748	0.646289	6.39829	0.000432127	0.0220976	59.2834	69.1773	78.3426	130.536	94.3874	95.0629
ENSMUSG00000046329	Slc25a23	TRUE	-0.267889	0.830534	6.36596	0.000435109	0.0220976	75.4749	73.3492	74.8223	91.9055	89.8653	87.5414
ENSMUSG00000040010	Slc7a5	TRUE	0.251131	1.19014	6.2708	0.00043573	0.0220976	79.6953	80.1513	78.2801	64.2522	65.4372	70.339
ENSMUSG00000026596	Abl2	TRUE	0.272381	1.2078	6.75749	0.000436829	0.0220976	125.45	110.715	117.17	91.5913	100.35	100.623
ENSMUSG00000045005	Fzd5	TRUE	0.974688	1.96522	3.44251	0.000445761	0.0224878	23.311	10.4072	14.0604	6.13821	9.19933	8.97906
ENSMUSG00000018770	Atp5g3	TRUE	0.352087	1.27641	7.78956	0.000449083	0.0225936	228.002	248.39	238.527	177.799	186.115	196.154
ENSMUSG00000010311	Optc	TRUE	-0.930611	0.524636	2.60465	0.00045694	0.0228643	3.51046	3.60511	5.27006	9.36443	7.60331	6.65782
ENSMUSG00000071324	Armc2	TRUE	-0.748151	0.595366	1.35445	0.000456314	0.0228643	2.03133	1.94993	2.08303	3.60332	3.52456	3.07699
ENSMUSG00000031103	Elf4	TRUE	0.675466	1.59711	3.56381	0.000459719	0.0229412	20.9444	14.6925	12.519	11.627	8.15748	10.3646
ENSMUSG00000050222	Il17d	TRUE	-1.1003	0.46642	-0.153366	0.000467651	0.0232116	0.532485	0.453473	0.604078	1.44552	1.24136	0.755753
ENSMUSG00000027907	S100a11	TRUE	-0.500799	0.706715	4.54963	0.00046689	0.0232116	18.5384	19.7941	22.2467	34.8181	26.9773	23.9502
ENSMUSG00000084168	Atp5l2	FALSE	-2.0184	0.246831	-1.78411	0.000476036	0.0235644	0.0394434	0.24941	0.0624908	0.314243	0.687179	0.413865
ENSMUSG00000092772	Gm26192	FALSE	-2.75634	0.147999	-2.46873	0.000493887	0.0243378	0.0197217	0.0906946	0.0416605	0.293293	0.37684	0.377876
ENSMUSG00000051811	Cox6b2	TRUE	0.585192	1.50024	3.29404	0.000494296	0.0243378	9.72279	12.8106	13.9354	8.69405	7.42597	8.16933
ENSMUSG00000039826	Trub2	TRUE	0.298474	1.22984	5.67896	0.000496104	0.0243619	54.5107	54.9836	54.3253	41.5848	45.1322	46.4608
ENSMUSG00000036103	Colec12	TRUE	-0.470995	0.721467	6.87731	0.000500248	0.0243765	90.8775	104.752	110.025	184.984	110.902	127.758
ENSMUSG00000038274	Fau	TRUE	0.309371	1.23917	8.35009	0.000498718	0.0243765	338.168	362.302	352.886	278.23	268.953	302.805
ENSMUSG00000027404	Snrpb	TRUE	0.331868	1.25864	8.13015	0.000500362	0.0243765	295.273	307.5	294.54	231.262	232.045	249.578
ENSMUSG00000025066	Sfr1	TRUE	-0.268963	0.829916	7.62271	0.000503519	0.0244657	189.466	186.105	175.266	208.804	230.272	224.657
ENSMUSG00000057506	Bloc1s2a	TRUE	0.370698	1.29298	4.8474	0.000505569	0.0245009	29.4247	30.9722	33.2034	24.6576	22.3444	25.3537
ENSMUSG00000095440	Fignl2	TRUE	0.952426	1.93512	5.12882	0.000507199	0.0245155	53.4457	49.7233	40.0774	18.9803	22.6326	32.3894
ENSMUSG00000016386	Mpped2	TRUE	-0.71163	0.61063	5.1642	0.000513248	0.0247286	25.6776	26.959	28.8707	46.6546	51.6049	35.2505
ENSMUSG00000066357	Wdr6	TRUE	0.269262	1.20519	8.28784	0.000515033	0.0247286	341.915	315.254	317.516	272.553	260.042	276.138
ENSMUSG00000035530	Eif1	TRUE	0.330151	1.25715	8.23586	0.000515626	0.0247286	307.185	345.592	333.055	246.618	251.729	285.765
ENSMUSG00000043811	Rtn4r	TRUE	-0.934636	0.523175	0.779983	0.000521698	0.0247625	1.06497	1.15636	1.16649	2.47204	2.10587	1.90738
ENSMUSG00000064367	mt-Nd5	TRUE	-0.396285	0.759812	10.4615	0.000520959	0.0247625	1255.05	1351.92	1272.79	1570.54	1670.95	1864.66
ENSMUSG00000027423	Snx5	TRUE	0.348747	1.27345	8.03791	0.000518993	0.0247625	271.134	315.912	293.769	204.174	235.702	251.738
ENSMUSG00000060938	Rpl26	TRUE	0.364751	1.28766	9.07893	0.000521215	0.0247625	562.147	615.839	604.807	449.179	439.196	496.098
ENSMUSG00000021765	Fst	TRUE	0.923069	1.89614	2.81459	0.000526462	0.0249246	15.5407	7.21022	7.10312	4.42035	5.49743	5.83009
ENSMUSG00000031654	Cbln1	TRUE	-1.3497	0.392375	4.23569	0.000531567	0.0251019	9.88056	9.40956	12.7481	41.5638	26.7113	13.4056
ENSMUSG00000061311	Rag1	TRUE	-1.77492	0.29221	-1.83137	0.000537553	0.0253198	0.11833	0.0906946	0.124982	0.628485	0.310339	0.233924
ENSMUSG00000039236	Isg20	TRUE	1.176	2.2595	-0.110724	0.000543904	0.0255538	1.08469	1.40577	1.22899	0.523738	0.421174	0.683776
ENSMUSG00000000214	Th	TRUE	1.12699	2.18403	2.52856	0.000551257	0.0258335	11.9513	7.00616	6.35323	3.39382	4.56642	3.63481
ENSMUSG00000026235	Epha4	TRUE	-0.446493	0.733825	7.20517	0.000555987	0.0259892	108.351	120.42	134.189	177.044	173.679	143.917
ENSMUSG00000028234	Rps20	TRUE	0.364343	1.2873	9.2204	0.000563836	0.0262896	611.688	702.271	673.484	508.214	499.734	535.901
ENSMUSG00000044177	Wfikkn2	TRUE	-1.02963	0.489835	1.53984	0.000573527	0.0266641	1.71579	1.51913	2.70793	5.74017	3.30289	3.11298
ENSMUSG00000056904	Gm5620	FALSE	-0.879501	0.543556	0.862258	0.000576221	0.0266641	1.28191	1.2924	1.16649	1.9902	2.61571	2.28525
ENSMUSG00000026966	Ssna1	TRUE	0.324006	1.2518	5.71108	0.000575594	0.0266641	55.2799	58.3166	56.325	44.7901	43.8243	47.0906
ENSMUSG00000089726	Mir17hg	FALSE	0.404313	1.32346	6.3763	0.000577646	0.0266641	96.4982	100.081	88.0704	61.8011	79.9345	73.344
ENSMUSG00000080921	Rpl38-ps2	FALSE	0.471079	1.38615	5.16473	0.00058094	0.0267493	38.7334	40.9939	41.2439	27.381	29.593	30.2841
ENSMUSG00000020691	Mettl2	TRUE	0.312281	1.24167	5.63632	0.000589456	0.0270739	56.6998	55.8679	55.7001	41.5219	46.7282	47.2526
ENSMUSG00000022108	Itm2b	TRUE	-0.3191	0.80157	6.4383	0.000603256	0.027639	75.4157	78.4281	81.4047	106.465	96.4268	90.6184
ENSMUSG00000006494	Pdk1	TRUE	-0.496194	0.708975	6.2403	0.000610706	0.0277977	64.2927	61.2188	56.3042	92.0312	100.195	64.293
ENSMUSG00000024304	Cdh2	TRUE	-0.305231	0.809312	8.455	0.000612012	0.0277977	304.207	323.757	316.037	384.78	410.911	370.751
ENSMUSG00000084166	Gm6451	FALSE	0.812251	1.75595	1.40939	0.000612742	0.0277977	3.01742	2.99292	3.06205	1.52931	1.79553	1.8354
ENSMUSG00000048636	A730049H05Rik	TRUE	3.73483	13.3136	-1.25434	0.000612563	0.0277977	2.6427	0.181389	0.124982	0.041899	0.0443341	0.125959
ENSMUSG00000079003	Samd1	TRUE	-0.29128	0.817177	6.05202	0.000615442	0.0278518	54.2938	66.9099	65.1987	76.7171	77.0971	74.2437
ENSMUSG00000060548	Tnfrsf19	TRUE	-0.304727	0.809595	7.82989	0.00062075	0.0280233	182.82	216.601	204.262	249.802	240.757	255.031
ENSMUSG00000021239	Vsx2	TRUE	5.11945	34.7622	-0.251645	0.000623982	0.0281005	9.09169	0	0	0.104748	0.0221671	0.125959
ENSMUSG00000057604	Lmcd1	TRUE	-1.28986	0.40899	-0.26202	0.000637347	0.0286325	0.512764	0.317431	0.583247	1.36172	1.15269	0.971682
ENSMUSG00000054836	Elp6	TRUE	0.381621	1.3028	4.59136	0.000639898	0.0286774	27.847	25.8026	26.2045	19.8811	20.3937	21.0171
ENSMUSG00000046341	Gm11223	FALSE	-0.579692	0.669107	3.32755	0.000652106	0.0291537	7.0998	7.9131	8.95701	13.261	11.9037	10.6705
ENSMUSG00000028172	Tacr3	TRUE	-1.33172	0.397294	-0.460239	0.000659929	0.0294322	0.335269	0.408126	0.437436	0.85893	1.26352	0.863718
ENSMUSG00000048070	Pirt	TRUE	-1.53529	0.345011	-1.15847	0.000666954	0.0296738	0.23666	0.181389	0.229133	0.817031	0.731513	0.359882
ENSMUSG00000015981	Stk32c	TRUE	0.870032	1.8277	1.33113	0.000675697	0.0299905	3.70768	2.76618	2.66627	1.67596	1.59603	1.72744
ENSMUSG00000092035	Peg10	TRUE	0.447821	1.36398	8.78963	0.000679239	0.0300755	626.045	472.451	494.427	339.738	405.724	422.394
ENSMUSG00000069972	Rps13-ps2	FALSE	-1.10702	0.464253	0.854653	0.000684388	0.0301759	1.28191	1.74587	1.20816	3.83376	2.77088	2.51918
ENSMUSG00000039130	Zc3hc1	TRUE	0.294938	1.22683	5.75644	0.000684777	0.0301759	58.5537	59.0648	54.8877	47.6392	44.844	48.0983
ENSMUSG00000030905	Crym	TRUE	1.09939	2.14263	4.57468	0.000687138	0.0302079	43.6638	23.3085	30.7871	12.1926	12.9234	20.4953
ENSMUSG00000083621	Gm14586	FALSE	-0.533945	0.690664	3.25707	0.000690966	0.030304	7.61257	9.06946	9.04033	14.12	12.4801	10.6525
ENSMUSG00000039116	Gpr126	TRUE	-1.36054	0.389438	0.814056	0.0006958	0.0304437	1.14386	0.952293	0.854041	3.98041	2.43838	1.18761
ENSMUSG00000075312	Gm13597	FALSE	-1.35925	0.389786	-1.02329	0.000702923	0.0306827	0.35499	0.294757	0.291624	1.19412	0.687179	0.557818
ENSMUSG00000055839	Tceb2	TRUE	0.267229	1.20349	7.21083	0.000707204	0.0307553	152.37	162.525	162.872	133.595	127.904	135.442
ENSMUSG00000028140	Mrpl9	TRUE	0.275115	1.21009	6.13928	0.000707917	0.0307553	73.5027	78.1787	76.7595	60.3555	61.9348	66.4343
ENSMUSG00000007682	Dio2	TRUE	-1.11909	0.460385	0.960163	0.00072014	0.0312128	1.16358	1.47379	1.91638	4.98598	2.39404	2.51918
ENSMUSG00000087095	Emx2os	FALSE	-0.52555	0.694694	4.48306	0.000738616	0.03192	15.0082	19.59	18.7472	26.4383	26.7335	23.6083
ENSMUSG00000021738	Atxn7	TRUE	-0.359279	0.779554	5.78919	0.000739914	0.03192	49.6197	46.1182	48.9303	59.9785	69.0948	56.5735
ENSMUSG00000024661	Fth1	TRUE	-0.321385	0.800301	8.10325	0.000744303	0.0320345	227.884	242.472	261.836	324.655	275.337	314.861
ENSMUSG00000057411	Fam173a	TRUE	0.330551	1.25749	5.3409	0.000753368	0.0323493	42.8946	44.5991	46.7431	32.7231	35.7333	38.2555
ENSMUSG00000070527	Mkrn3	TRUE	0.431054	1.34822	3.85396	0.000757515	0.0324519	16.9606	17.3227	15.9768	12.2136	12.5909	12.4699
ENSMUSG00000084129	Hmgb1-ps1	FALSE	-2.09248	0.234477	-2.49071	0.000763692	0.0326079	0.0394434	0.0906946	0.0416605	0.293293	0.177337	0.269912
ENSMUSG00000019929	Dcn	TRUE	-1.29244	0.408261	2.45196	0.000764689	0.0326079	3.11602	2.87955	4.14522	12.444	6.69446	5.72213
ENSMUSG00000090516	Rps11-ps1	FALSE	-1.26408	0.416365	-0.811388	0.000776115	0.0330189	0.315547	0.566841	0.249963	1.00558	0.953184	0.755753
ENSMUSG00000001833	2014-09-07	TRUE	-0.279024	0.824148	7.95627	0.000798565	0.0338181	221.218	235.284	230.966	263.566	292.827	277.757
ENSMUSG00000045493	Bhlhe23	TRUE	2.38495	5.22326	-2.38211	0.000796827	0.0338181	0.453599	0.362778	0.145812	0.0209495	0.0443341	0.107965
ENSMUSG00000097825	AC093341.1	FALSE	-1.71204	0.305227	-1.59687	0.000802193	0.0338313	0.157773	0.181389	0.124982	0.607536	0.687179	0.251918
ENSMUSG00000029804	Herc3	TRUE	-0.425103	0.744786	4.54257	0.000802765	0.0338313	18.282	18.411	21.1427	26.2078	28.13	23.3564
ENSMUSG00000046230	Vps13a	TRUE	-0.363352	0.777356	5.33515	0.000804374	0.0338313	36.8401	35.8244	34.2241	45.5652	42.6938	49.2139
ENSMUSG00000036617	Etl4	TRUE	-0.555745	0.680305	5.67593	0.000809462	0.0338745	45.2612	34.736	43.6394	71.794	61.8018	48.2062
ENSMUSG00000042372	Dmrt3	TRUE	-0.555484	0.680429	4.74265	0.000810903	0.0338745	17.9073	24.805	21.4968	37.2901	27.1547	29.8882
ENSMUSG00000053801	Grwd1	TRUE	0.391199	1.31148	5.94424	0.000810475	0.0338745	68.5525	69.3133	66.0528	47.9744	51.4498	56.0337
ENSMUSG00000085843	A730085A09Rik	FALSE	-1.34458	0.393769	-1.17774	0.000817486	0.0339956	0.23666	0.272084	0.145812	0.523738	0.665012	0.485841
ENSMUSG00000085385	9430008C03Rik	FALSE	0.348429	1.27317	5.74012	0.000816055	0.0339956	57.824	58.9968	60.7827	43.7426	48.7897	46.9646
ENSMUSG00000022521	Crebbp	TRUE	-0.342959	0.788423	6.35826	0.000821095	0.034069	83.758	69.1773	77.2178	101.081	101.836	89.0889
ENSMUSG00000086786	Gm15908	FALSE	-1.74031	0.299305	-1.93851	0.00084718	0.0346429	0.0788867	0.0680209	0.145812	0.398041	0.177337	0.413865
ENSMUSG00000021365	Nedd9	TRUE	-0.359063	0.779671	5.68968	0.000845527	0.0346429	39.2856	44.7124	47.8263	52.9185	59.6073	56.5375
ENSMUSG00000031781	Ciapin1	TRUE	0.25555	1.19379	6.29827	0.000843239	0.0346429	79.1628	83.7791	79.8216	65.572	67.2327	70.501
ENSMUSG00000057322	Rpl38	TRUE	0.343187	1.26856	7.57989	0.00084806	0.0346429	196.507	222.723	214.364	162.61	168.403	168.425
ENSMUSG00000031028	Tub	TRUE	0.448446	1.36457	5.46843	0.000839983	0.0346429	50.1325	47.6373	53.388	30.4815	42.7159	37.5897
ENSMUSG00000026204	Ptprn	TRUE	0.785695	1.72392	2.24496	0.00084791	0.0346429	6.80398	5.12424	6.66568	2.45109	4.21174	4.12065
ENSMUSG00000088183	Gm22215	FALSE	1.49303	2.8148	-1.88869	0.000842416	0.0346429	0.276103	0.362778	0.395775	0.041899	0.133002	0.179941
ENSMUSG00000085007	Gm11549	FALSE	1.88236	3.68678	-1.73508	0.000873999	0.0356236	0.82831	0.340105	0.270793	0.0209495	0.243838	0.125959
ENSMUSG00000025812	Pard3	TRUE	-0.223303	0.856602	6.82892	0.000876397	0.0356427	108.095	102.984	104.714	122.01	122.03	124.627
ENSMUSG00000043635	Adamts3	TRUE	0.397101	1.31686	5.30202	0.000884007	0.0357945	36.0512	43.9642	43.9727	29.057	33.8491	31.2378
ENSMUSG00000024987	Cyp26a1	TRUE	1.89726	3.72505	-0.0820187	0.000883303	0.0357945	2.3666	1.38309	1.18733	0.293293	0.354673	0.665782
ENSMUSG00000029765	Plxna4	TRUE	-0.923689	0.527159	4.00828	0.000905678	0.0364384	11.6161	9.56828	13.2064	31.2567	19.5292	14.4853
ENSMUSG00000050966	Lin28a	TRUE	1.19755	2.29349	5.32609	0.000905829	0.0364384	63.8193	63.0101	43.3894	15.754	22.1671	36.2761
ENSMUSG00000085323	9130410C08Rik	FALSE	1.33308	2.51939	0.33982	0.000905361	0.0364384	2.42577	1.67785	1.54144	0.712283	0.487676	1.02566
ENSMUSG00000021643	Serf1	TRUE	-0.412689	0.751222	3.955	0.0009213	0.0369802	12.1288	13.7629	14.602	17.9118	18.975	17.0224
ENSMUSG00000037475	Thoc2	TRUE	-0.254429	0.838319	7.35472	0.000924609	0.0370325	155.998	151.279	147.978	170.131	191.102	181.849
ENSMUSG00000025407	Gli1	TRUE	0.937483	1.91518	5.14037	0.000929584	0.0371512	63.7996	42.7852	44.4934	26.7735	19.9947	32.1015
ENSMUSG00000091243	Vgll3	TRUE	-1.01602	0.494479	1.1522	0.000940901	0.0372224	1.28191	1.17903	1.89555	4.1899	2.81522	1.8354
ENSMUSG00000063446	E130309F12Rik	TRUE	-0.654894	0.635122	2.63243	0.000939476	0.0372224	3.90489	4.80681	5.49919	8.84069	7.11563	6.4239
ENSMUSG00000032330	Cox7a2	TRUE	0.306313	1.23654	6.69542	0.000936843	0.0372224	108.173	115.273	115.983	92.4712	91.3283	90.6904
ENSMUSG00000044352	Sowaha	TRUE	1.28788	2.4417	-0.342491	0.000935593	0.0372224	1.65662	1.08833	0.604078	0.398041	0.465508	0.503835
ENSMUSG00000071540	3425401B19Rik	TRUE	3.73553	13.3201	-3.29435	0.000941447	0.0372224	0.157773	0.113368	0.0833211	0	0	0.0179941
ENSMUSG00000038255	Neurod2	TRUE	-2.62672	0.161911	0.532017	0.000947344	0.0373593	0.295825	0.362778	0.604078	4.12705	2.90389	0.809735
ENSMUSG00000081434	Gm14165	FALSE	-1.60504	0.328727	-0.916624	0.000948956	0.0373593	0.23666	0.385452	0.229133	1.38267	0.842349	0.377876
ENSMUSG00000054641	Mmrn1	TRUE	-0.421534	0.746631	4.24121	0.000953076	0.0374417	16.1718	16.3023	16.81	24.2805	21.8346	19.9195
ENSMUSG00000000247	Lhx2	TRUE	-0.548073	0.683933	8.32071	0.00097271	0.0380511	227.411	267.594	268.377	362.301	420.354	333.521
ENSMUSG00000025809	Itgb1	TRUE	-0.255284	0.837822	8.03352	0.000971426	0.0380511	230.625	246.984	250.442	309.571	277.643	281.752
ENSMUSG00000027889	Ampd2	TRUE	0.308511	1.23843	6.28495	0.000975482	0.0380789	84.1918	84.6634	84.8	67.0384	65.3707	72.3723
ENSMUSG00000046982	Tshz1	TRUE	-0.418459	0.748223	5.68587	0.000982295	0.0382251	45.8135	41.5608	43.2645	61.7592	61.1589	51.7331
ENSMUSG00000021236	Entpd5	TRUE	-0.366803	0.775499	4.19373	0.000983368	0.0382251	15.7773	16.257	16.1018	21.8084	20.4602	19.8115
ENSMUSG00000081094	Rpl19-ps11	FALSE	-0.613568	0.653579	2.18015	0.000996529	0.0386553	3.82601	3.99056	3.72862	6.09631	5.7191	5.84809
ENSMUSG00000002329	Mdp1	TRUE	0.288608	1.22146	5.59979	0.00100354	0.0388456	52.3413	56.6161	53.4505	44.9996	43.913	44.0316
ENSMUSG00000048904	Neurog1	TRUE	-0.509207	0.702609	4.20767	0.00101231	0.0390216	13.6671	16.5744	15.3311	24.5109	21.0587	19.2897
ENSMUSG00000033720	Sfxn5	TRUE	-0.421193	0.746807	4.32171	0.00101104	0.0390216	15.7379	17.436	17.9765	21.8503	25.5365	21.1251
ENSMUSG00000097195	Snhg5	FALSE	0.278981	1.21334	6.04773	0.00101505	0.0390456	67.4876	77.9293	71.9477	55.3067	60.2501	63.5192
ENSMUSG00000030226	Lmo3	TRUE	0.669738	1.59078	4.48118	0.00102076	0.0391837	37.3529	27.027	18.1432	17.828	15.6721	18.372
ENSMUSG00000019890	Nts	TRUE	2.16397	4.48147	-2.52285	0.00105454	0.0403964	0.197217	0.294757	0.166642	0.0209495	0.0443341	0.0719765
ENSMUSG00000022610	Mapk12	TRUE	0.428774	1.34609	5.64272	0.00107104	0.0409436	56.4829	62.2165	52.9089	36.8921	41.1643	49.3759
ENSMUSG00000097052	AL732311.1	FALSE	0.368253	1.29079	4.80244	0.00107401	0.0409721	28.8923	30.8362	31.5579	23.652	23.7631	23.3024
ENSMUSG00000032332	Col12a1	TRUE	-0.478541	0.717703	5.203	0.00107855	0.0410604	25.4212	30.9042	34.3908	44.9367	45.509	35.9702
ENSMUSG00000081998	Gm13245	FALSE	0.843524	1.79443	0.081482	0.00108261	0.0411303	1.10441	1.2017	1.41646	0.670384	0.798015	0.6118
ENSMUSG00000022000	Zc3h13	TRUE	-0.254055	0.838536	7.19167	0.00108878	0.0412709	141.207	129.036	133.689	159.845	172.149	149.819
ENSMUSG00000026890	Lhx6	TRUE	1.13039	2.18917	2.05856	0.00109078	0.0412709	4.85153	6.73407	7.87384	3.62427	2.61571	2.64514
ENSMUSG00000056158	Car10	TRUE	-1.85858	0.275748	-1.96585	0.00111352	0.0420451	0.0986084	0.0906946	0.124982	0.544687	0.465508	0.161947
ENSMUSG00000045103	Dmd	TRUE	-0.356059	0.781296	4.80134	0.00111843	0.0421442	24.4549	24.9864	26.7044	30.3558	34.891	32.2275
ENSMUSG00000022636	Alcam	TRUE	-0.977425	0.507886	6.47923	0.00112737	0.0423945	54.8263	55.3917	73.6766	166.318	111.678	84.1045
ENSMUSG00000038967	Pdk2	TRUE	-0.594156	0.662432	3.00831	0.00115176	0.042981	6.07428	5.16959	7.26976	10.4748	8.42349	9.06904
ENSMUSG00000042121	Ssh1	TRUE	-0.316132	0.803221	5.72536	0.00114715	0.042981	49.245	45.642	49.3261	64.1684	60.9373	54.5042
ENSMUSG00000038393	Txnip	TRUE	0.402891	1.32215	5.25804	0.00114855	0.042981	43.8413	46.7757	48.4095	34.2315	30.6792	40.1809
ENSMUSG00000042942	Greb1l	TRUE	0.874444	1.8333	3.02936	0.00115227	0.042981	14.9096	9.81769	8.66539	5.97061	5.2536	6.98172
ENSMUSG00000039831	Arhgap29	TRUE	-0.320861	0.800592	6.16192	0.00115689	0.0430663	61.0189	64.1664	69.9272	85.3693	84.0797	74.2977
ENSMUSG00000032334	Loxl1	TRUE	-0.674913	0.62637	3.23427	0.00116648	0.0432489	6.46871	7.89043	7.54056	14.8742	9.86435	10.2207
ENSMUSG00000008496	Pou2f2	TRUE	0.833466	1.78196	2.41686	0.00116566	0.0432489	9.68334	6.39397	5.72832	2.95388	4.45558	4.82242
ENSMUSG00000025330	Padi4	TRUE	-0.884036	0.541849	0.905139	0.00117868	0.0434232	0.887475	1.56448	1.64559	2.2416	2.88172	2.42921
ENSMUSG00000030428	Ttyh1	TRUE	-0.795469	0.576156	6.25144	0.0011785	0.0434232	48.1998	54.5528	66.0736	97.8552	124.136	71.0588
ENSMUSG00000031217	Efnb1	TRUE	-0.426177	0.744231	8.00763	0.00117738	0.0434232	191.655	228.324	227.383	299.704	291.43	278.693
ENSMUSG00000005481	Ddx39	TRUE	0.296455	1.22812	7.14971	0.00118059	0.0434232	154.224	158.307	144.645	119.915	122.407	129.9
ENSMUSG00000043004	Gng2	TRUE	-0.399408	0.758169	7.35984	0.00119105	0.0436761	135.291	143.093	153.811	197.784	201.676	170.62
ENSMUSG00000098172	RP23-136M3.8	FALSE	3.05398	8.305	0.275607	0.0011922	0.0436761	1.6369	2.63014	2.97873	0	0.598511	0.269912
ENSMUSG00000026249	Serpine2	TRUE	0.474437	1.38938	4.7286	0.00119954	0.043858	32.738	31.9925	30.308	27.9257	16.714	23.7342
ENSMUSG00000021018	Polr2h	TRUE	0.35017	1.27471	5.68345	0.00121568	0.0442729	53.3471	58.9515	57.0958	42.2971	43.6248	46.9287
ENSMUSG00000049612	Omg	TRUE	2.52977	5.77478	-3.02427	0.0012139	0.0442729	0.23666	0.0906946	0.166642	0.041899	0	0.0359882
ENSMUSG00000029334	Prkg2	TRUE	-0.647545	0.638366	3.02563	0.00121828	0.0442802	6.48843	6.07654	6.47821	9.28063	11.7264	8.85311
ENSMUSG00000050423	Ppp1r3g	TRUE	-0.791204	0.577862	1.10842	0.0012332	0.0447343	1.47913	1.58716	1.45812	2.70249	3.19206	1.96136
ENSMUSG00000043639	Rbm20	TRUE	-1.09036	0.469645	3.27741	0.00123818	0.0447393	6.66593	5.80445	6.95731	16.173	14.2756	10.9404
ENSMUSG00000013465	Nelfb	TRUE	0.231089	1.17372	6.65557	0.00123669	0.0447393	104.19	110.874	104.922	87.7575	92.1263	92.7057
ENSMUSG00000030616	Sytl2	TRUE	1.34254	2.53598	0.763028	0.00124704	0.0449714	4.79237	2.0633	1.54144	0.942728	0.864516	1.49351
ENSMUSG00000018761	Mpdu1	TRUE	0.264091	1.20088	5.68038	0.00126017	0.0453562	54.491	54.8475	53.4088	44.3711	44.7775	46.3528
ENSMUSG00000058153	Sez6l	TRUE	-1.13804	0.454378	2.95539	0.00127733	0.0458842	3.60907	4.94285	6.10327	13.7219	11.7264	6.81977
ENSMUSG00000040918	Slc19a2	TRUE	0.357393	1.28111	4.49004	0.00127981	0.0458842	23.5871	24.941	24.3089	18.8546	18.3987	19.5776
ENSMUSG00000091415	Akd1	TRUE	-1.20912	0.432531	-1.48086	0.00128695	0.0460507	0.197217	0.158716	0.291624	0.628485	0.37684	0.503835
ENSMUSG00000042254	Cilp	TRUE	-1.23302	0.425426	-0.101904	0.0013015	0.0464814	0.532485	0.430799	0.687399	1.73881	1.17485	0.989676
ENSMUSG00000046580	Gm7862	FALSE	0.71429	1.64068	1.38603	0.00132735	0.0473131	3.21463	2.83421	2.97873	1.71786	1.8177	1.96136
ENSMUSG00000038319	Kcnh2	TRUE	0.455831	1.37157	4.06514	0.00134058	0.0476926	21.1614	20.1569	17.6016	12.3812	13.5662	16.9685
ENSMUSG00000032076	Cadm1	TRUE	-0.261056	0.834477	7.10691	0.00134381	0.0477155	118.093	130.986	125.232	137.282	150.47	160.723
ENSMUSG00000074651	Mcidas	TRUE	-0.878418	0.543963	2.37788	0.00135385	0.0479798	2.40604	3.58244	4.70764	7.93987	5.76344	5.95605
ENSMUSG00000067365	Tmem128	TRUE	0.295281	1.22712	5.34153	0.00136695	0.0483514	43.9399	44.5084	42.2021	34.2315	36.4427	35.7903
ENSMUSG00000021764	Ndufs4	TRUE	0.261697	1.19889	6.06309	0.00138877	0.0490293	68.6314	73.1225	70.7604	56.6684	57.0359	63.4832
ENSMUSG00000052353	9930013L23Rik	TRUE	-1.75021	0.297258	2.94495	0.00139568	0.049179	2.95825	2.90223	4.33269	14.8113	13.9653	5.54219
ENSMUSG00000035105	Egln3	TRUE	-0.740969	0.598337	2.72936	0.00141062	0.0496108	5.12764	4.85216	5.18674	10.3491	9.33234	5.70414
ENSMUSG00000068699	Flnc	TRUE	-0.544823	0.685476	4.58112	0.00141769	0.0496985	18.1242	19.2046	21.7051	36.8083	23.7853	25.5337
ENSMUSG00000027996	Sfrp2	TRUE	0.823085	1.76919	5.30048	0.00141849	0.0496985	82.5155	44.0549	33.3701	26.8992	25.9576	37.5357
ENSMUSG00000029697	Fezf1	TRUE	0.459855	1.3754	5.56939	0.00142511	0.0498107	59.3228	60.0398	46.2848	35.6561	37.6619	47.0726
ENSMUSG00000053545	6430503K07Rik	TRUE	5.36798	41.2975	-2.35962	0.00142709	0.0498107	1.02553	0.0906946	0.0208303	0.0209495	0	0
ENSMUSG00000002881	Nab1	TRUE	-0.449613	0.732239	4.08453	0.00145679	0.0503542	13.3121	14.2617	15.6227	20.4467	20.4602	18.1021
ENSMUSG00000032536	Trak1	TRUE	-0.251728	0.83989	6.57775	0.00145771	0.0503542	89.5759	84.1646	83.4252	108.204	101.614	96.4305
ENSMUSG00000090862	Rps13	TRUE	0.325192	1.25283	8.5395	0.00145047	0.0503542	391.199	415.222	396.462	313.53	312.112	334.457
ENSMUSG00000027079	Clp1	TRUE	0.331349	1.25819	5.01175	0.00145903	0.0503542	34.1185	37.5476	35.0573	26.7106	28.662	29.4204
ENSMUSG00000070394	Tmem256	TRUE	0.366881	1.28956	4.80126	0.00145837	0.0503542	32.6591	31.9018	29.5581	25.7051	23.5858	23.6983
ENSMUSG00000030551	Nr2f2	TRUE	0.771375	1.7069	6.73878	0.00145386	0.0503542	182.978	135.656	98.7146	86.9195	55.861	101.703
ENSMUSG00000085463	9430024E24Rik	FALSE	-1.71524	0.304553	-0.922082	0.00146379	0.0503736	0.35499	0.0906946	0.208303	1.46647	0.310339	0.413865
ENSMUSG00000029055	Plch2	TRUE	-1.41679	0.374545	1.42018	0.00146505	0.0503736	1.16358	1.2017	1.85389	4.83934	4.14524	2.30325
ENSMUSG00000027560	Dok5	TRUE	-0.851706	0.554129	1.2015	0.00147375	0.0505785	1.51857	1.67785	1.7914	3.20528	3.5689	2.24926
ENSMUSG00000093738	AI606473	FALSE	4.42928	21.545	-0.738012	0.00148476	0.0508621	0.0788867	1.88191	1.77057	0.0209495	0.110835	0.0359882
ENSMUSG00000021127	Zfp36l1	TRUE	-0.273928	0.827064	6.13675	0.00148871	0.0509029	64.3124	67.7035	68.4899	85.9978	75.8114	80.5957
ENSMUSG00000022884	Eif4a2	TRUE	0.288818	1.22164	8.74648	0.00149546	0.051039	458.568	513.331	491.365	380.192	404.882	412.677
ENSMUSG00000027495	Fam210b	TRUE	-0.394928	0.760527	4.35887	0.00149841	0.0510454	17.6115	16.393	18.5806	24.8461	22.3887	21.9348
ENSMUSG00000038725	Pkhd1l1	TRUE	-0.84257	0.557649	3.22198	0.00151402	0.0514821	5.69956	5.14692	9.7069	14.0781	10.1747	12.6139
ENSMUSG00000080836	Gm6444	FALSE	-1.70744	0.306203	-2.44588	0.00153785	0.0517255	0.0788867	0.113368	0.0416605	0.314243	0.266005	0.197935
ENSMUSG00000073530	Pappa2	TRUE	-1.64237	0.320331	1.29745	0.00153486	0.0517255	1.53829	0.657536	1.16649	6.74574	1.77337	2.01534
ENSMUSG00000073682	Gm10563	TRUE	-1.36558	0.388078	-2.03351	0.00152526	0.0517255	0.059165	0.158716	0.229133	0.335192	0.421174	0.395871
ENSMUSG00000025006	Sorbs1	TRUE	-0.596836	0.661203	4.27214	0.00153599	0.0517255	16.5859	13.5362	17.789	29.6226	23.4306	19.4516
ENSMUSG00000027080	Med19	TRUE	-0.270039	0.829297	5.62014	0.00153798	0.0517255	45.281	47.4559	45.2225	54.0916	56.3044	55.9437
ENSMUSG00000008859	Rala	TRUE	-0.257159	0.836734	6.71332	0.0015358	0.0517255	96.1826	103.483	99.3395	114.95	123.604	118.779
ENSMUSG00000064380	Gm26448	FALSE	1.0418	2.0588	-0.677301	0.00154354	0.0518181	0.611372	0.929619	0.833211	0.314243	0.354673	0.467847
ENSMUSG00000064326	Siva1	TRUE	0.292911	1.22511	5.94966	0.00155316	0.0520465	63.8193	67.7715	64.0531	53.2118	51.6936	54.7561
ENSMUSG00000044550	Tceal3	TRUE	-0.563891	0.676475	3.41008	0.00155694	0.0520785	8.26338	7.79973	9.91521	12.8211	13.2559	12.344
ENSMUSG00000028525	Pde4b	TRUE	-0.549411	0.683299	3.11999	0.00156687	0.0523005	6.94203	6.37129	7.12395	10.4119	10.1082	9.41092
ENSMUSG00000015597	Zfp318	TRUE	-0.232672	0.851057	6.51523	0.00157321	0.0523005	91.2325	80.4007	81.363	99.9501	103.01	94.4151
ENSMUSG00000003438	Timm50	TRUE	0.26648	1.20287	6.42863	0.00157328	0.0523005	93.2638	92.055	86.9247	74.5593	73.2843	78.4544
ENSMUSG00000090733	Rps27	TRUE	0.326081	1.2536	8.65028	0.00157491	0.0523005	403.722	460.456	450.954	361.547	336.208	351.299
ENSMUSG00000048118	Arid4a	TRUE	-0.310635	0.806287	5.15583	0.00158904	0.0526751	33.5466	31.6297	32.1619	40.2021	43.647	36.9419
ENSMUSG00000064138	Fam172a	TRUE	0.342101	1.2676	5.7945	0.00160848	0.0532241	70.0711	62.5339	55.0544	49.5037	46.6839	51.8411
ENSMUSG00000082107	Gm16216	FALSE	-1.45532	0.364674	-1.87038	0.00162565	0.0534094	0.23666	0.0680209	0.104151	0.377091	0.421174	0.359882
ENSMUSG00000046318	Ccbe1	TRUE	-0.701942	0.614744	3.33008	0.00162379	0.0534094	6.78426	7.55032	7.89467	14.8113	11.4825	9.87877
ENSMUSG00000030657	Xylt1	TRUE	-0.577722	0.670021	3.9253	0.00161761	0.0534094	11.5372	10.4299	13.623	19.7554	18.8642	14.5392
ENSMUSG00000087549	Gm13427	FALSE	0.873033	1.83151	0.226268	0.00162261	0.0534094	1.34107	1.42844	1.43729	0.586586	0.975351	0.737759
ENSMUSG00000030549	Rhcg	TRUE	-0.985288	0.505125	1.93594	0.00163063	0.0534778	1.4594	2.72084	3.87443	6.93429	4.65508	4.35458
ENSMUSG00000041119	Pde9a	TRUE	-0.430448	0.742031	4.15492	0.00164887	0.0538844	13.4305	14.7152	15.8935	20.3001	21.1474	17.9221
ENSMUSG00000021041	2700073G19Rik	TRUE	1.01205	2.01677	-0.401224	0.00164866	0.0538844	0.670537	0.929619	1.08317	0.41899	0.354673	0.539824
ENSMUSG00000047787	Flrt1	TRUE	-0.628096	0.64703	3.46426	0.00165674	0.0540195	7.04064	8.82005	11.2483	16.0892	12.4136	13.3876
ENSMUSG00000063804	Lin28b	TRUE	0.734222	1.6635	6.70098	0.00165885	0.0540195	145.112	141.801	113.692	59.9994	77.2744	103.52
ENSMUSG00000039031	Arhgap18	TRUE	-0.369425	0.774091	4.78609	0.00167013	0.0542909	23.5674	24.0114	24.8922	34.7343	29.0389	29.8522
ENSMUSG00000026587	Astn1	TRUE	-0.337895	0.791195	6.24595	0.00167607	0.0543885	66.679	61.831	70.4688	87.988	86.5624	76.9968
ENSMUSG00000050621	Gm9846	TRUE	-0.636379	0.643325	1.72234	0.00168141	0.0544354	2.91881	2.53945	2.6871	4.71364	4.10091	3.86874
ENSMUSG00000027792	Bche	TRUE	0.596255	1.51179	3.39554	0.00168342	0.0544354	14.811	10.1805	10.1027	6.68289	7.4703	9.05104
ENSMUSG00000028753	Vwa5b1	TRUE	1.21809	2.32638	0.031786	0.00168898	0.0545198	1.73551	1.49646	1.20816	0.607536	0.421174	0.863718
ENSMUSG00000005917	Otx1	TRUE	-0.321707	0.800122	6.61924	0.00169393	0.054584	80.918	87.4069	88.0079	116.102	99.774	104.474
ENSMUSG00000025056	Nr0b1	TRUE	1.78958	3.45713	-0.187543	0.00169747	0.0546031	1.83412	1.17903	0.937362	0.125697	0.487676	0.521829
ENSMUSG00000020241	Col6a2	TRUE	-0.702353	0.614569	4.39154	0.00171568	0.0550927	14.949	14.4885	19.1847	35.9703	21.6794	21.485
ENSMUSG00000000724	Cryba1	TRUE	2.3082	4.95266	-2.36139	0.00173687	0.0556763	0.631094	0.158716	0.104151	0.041899	0	0.125959
ENSMUSG00000080974	Gm9009	FALSE	-2.23268	0.212764	-2.77849	0.00174799	0.0558389	0	0.0680209	0.0416605	0.209495	0.133002	0.179941
ENSMUSG00000027285	Haus2	TRUE	0.313444	1.24267	5.79893	0.00174506	0.0558389	57.7253	64.2118	60.7411	41.6476	51.1394	54.1623
ENSMUSG00000052146	Rps10	TRUE	0.295767	1.22754	8.98822	0.00177249	0.0565238	520.179	580.309	561.209	440.443	447.354	465.85
ENSMUSG00000060639	Hist1h4i	TRUE	0.346519	1.27149	4.42075	0.00177694	0.0565499	21.9897	23.7393	23.2049	17.9537	19.3297	16.9505
ENSMUSG00000062713	Sim2	TRUE	3.26578	9.61829	-1.13084	0.00177943	0.0565499	1.59746	0.725557	0.437436	0.167596	0.0221671	0.0899706
ENSMUSG00000081535	Gm15453	FALSE	0.901073	1.86745	0.4226	0.00178669	0.056683	1.69606	1.7232	1.24982	0.712283	0.842349	0.935694
ENSMUSG00000067148	Polr1c	TRUE	0.257921	1.19575	6.35597	0.00178994	0.0566886	87.0712	90.2184	84.55	70.8722	71.5996	76.457
ENSMUSG00000021933	Gucy1b2	TRUE	-1.77706	0.291778	-1.29151	0.00179873	0.0567721	0.177495	0.113368	0.187472	0.754182	0.687179	0.233924
ENSMUSG00000014813	Stc1	TRUE	-0.677422	0.625281	2.42063	0.00179575	0.0567721	3.80628	4.28532	3.74945	6.03346	7.98015	4.94838
ENSMUSG00000086429	Gt(ROSA)26Sor	FALSE	0.502987	1.41714	4.7748	0.00180545	0.0567902	28.7542	33.8517	31.3495	18.1423	24.2064	23.9322
ENSMUSG00000001901	Kcnh6	TRUE	1.00076	2.00106	-0.617192	0.00180298	0.0567902	0.848032	1.15636	0.937362	0.293293	0.709346	0.467847
ENSMUSG00000033717	Adra2a	TRUE	-0.664428	0.630939	3.30415	0.00181334	0.0568448	6.64621	7.84508	8.6029	14.539	11.416	10.6525
ENSMUSG00000010755	Cars	TRUE	0.244482	1.18467	6.20057	0.00181038	0.0568448	76.9343	78.0427	78.0927	60.6069	65.7032	70.375
ENSMUSG00000052031	Tagap1	TRUE	0.308761	1.23864	5.25955	0.00183957	0.0575491	40.7055	42.241	41.3897	30.3768	34.9131	35.0705
ENSMUSG00000012848	Rps5	TRUE	0.327796	1.25509	9.42841	0.00184204	0.0575491	701.106	782.49	746.848	601.565	567.078	608.435
ENSMUSG00000029178	Klf3	TRUE	-0.346052	0.786734	5.18546	0.00185222	0.0577692	33.231	31.1082	33.4742	39.5527	45.0878	39.731
ENSMUSG00000035551	Igfbpl1	TRUE	-0.360459	0.778917	6.88658	0.00186803	0.0581639	101.646	99.3332	102.381	148.616	124.712	116.17
ENSMUSG00000028150	Rorc	TRUE	-1.20882	0.432621	-0.851754	0.00187273	0.0582123	0.374712	0.272084	0.333284	0.921779	0.90885	0.467847
ENSMUSG00000032394	Igdcc3	TRUE	0.843157	1.79397	7.75988	0.00187757	0.0582645	319.255	298.567	214.198	130.997	125.2	207.562
ENSMUSG00000027562	Car2	TRUE	-0.552144	0.682006	6.07032	0.00188349	0.0583504	45.3599	44.4857	65.1154	79.4825	66.7894	80.9375
ENSMUSG00000042417	Ccno	TRUE	-0.671904	0.627678	2.6178	0.00190063	0.0586318	3.35269	5.03355	5.54085	8.56835	6.80529	6.80178
ENSMUSG00000019863	Qrsl1	TRUE	0.324357	1.25211	4.81733	0.00190064	0.0586318	31.8308	30.2466	30.3914	24.6995	25.6251	23.5543
ENSMUSG00000078302	Foxd1	TRUE	1.0213	2.02975	4.32993	0.00190211	0.0586318	39.8575	25.5985	19.7263	14.2876	10.3742	17.2923
ENSMUSG00000046330	Rpl37a	TRUE	0.284436	1.21793	8.6	0.00191376	0.0588928	399.443	432.182	421.667	348.726	325.346	354.916
ENSMUSG00000028488	Sh3gl2	TRUE	-0.838249	0.559322	2.09905	0.0019227	0.0590695	2.99769	2.31271	3.62447	5.84491	6.11811	4.04868
ENSMUSG00000059146	Ntrk3	TRUE	-0.577403	0.670169	3.03733	0.00192912	0.0591682	6.29121	6.77942	6.70735	10.0977	11.5269	7.91741
ENSMUSG00000031428	Zcchc18	TRUE	-0.361256	0.778487	5.471	0.00195409	0.0598346	34.5918	37.7063	41.3064	54.5316	43.2258	48.1523
ENSMUSG00000031925	Maml2	TRUE	-0.452979	0.730533	3.98723	0.00196356	0.0600251	14.456	12.6972	12.8523	18.666	19.2189	16.9145
ENSMUSG00000027381	Bcl2l11	TRUE	0.344826	1.27	5.40328	0.0019691	0.060095	50.6255	45.0752	45.3683	35.9494	36.3097	38.8133
ENSMUSG00000031665	Sall1	TRUE	-0.725057	0.604973	6.82589	0.00200113	0.0609718	87.584	78.6775	91.1532	136.36	164.879	124.285
ENSMUSG00000025044	Msr1	TRUE	-1.59108	0.331922	-1.59262	0.00201244	0.0612154	0.0986084	0.0680209	0.208303	0.607536	0.354673	0.197935
ENSMUSG00000000916	Nsun5	TRUE	0.334799	1.2612	4.41224	0.00202782	0.0614992	22.5024	24.1021	23.1216	18.3099	18.0218	18.9298
ENSMUSG00000074129	Rpl13a	TRUE	0.341824	1.26736	9.96191	0.00202843	0.0614992	1034.2	1180.53	1167.56	869.132	859.351	940.247
ENSMUSG00000025404	R3hdm2	TRUE	-0.258271	0.836089	6.45503	0.00203671	0.0615649	85.0793	75.2311	79.9882	99.7406	96.6928	91.0502
ENSMUSG00000028367	Txn1	TRUE	0.294403	1.22638	7.66162	0.00203727	0.0615649	209.168	232.042	215.156	173.525	171.462	190.162
ENSMUSG00000021609	Slc6a3	TRUE	-1.43594	0.369606	-1.47704	0.00205757	0.0617532	0.157773	0.226736	0.124982	0.670384	0.509843	0.215929
ENSMUSG00000057605	Gm6807	FALSE	-0.796652	0.575684	0.624936	0.00204891	0.0617532	1.30163	1.42844	1.08317	2.49299	2.43838	1.70944
ENSMUSG00000022353	Mtss1	TRUE	-0.290656	0.81753	6.31737	0.00206022	0.0617532	65.2196	69.5401	77.5927	86.0397	90.486	83.2408
ENSMUSG00000059775	Rps26-ps1	TRUE	0.788111	1.72681	2.19119	0.00205668	0.0617532	4.85153	5.82713	5.87413	3.98041	2.92605	2.68112
ENSMUSG00000067438	Hmx1	TRUE	2.7467	6.71179	-1.73788	0.00205419	0.0617532	1.93272	0.158716	0.0624908	0.125697	0.177337	0.0179941
ENSMUSG00000064036	Mro	TRUE	-0.889426	0.539829	0.978782	0.00206724	0.061763	0.926919	1.45111	1.74974	2.43014	3.30289	1.92537
ENSMUSG00000037994	Slc9b2	TRUE	-0.557186	0.679627	3.27554	0.00206424	0.061763	6.52787	8.25321	8.24878	10.4538	11.9924	11.4263
ENSMUSG00000039691	Tspan10	TRUE	4.8275	28.3937	-2.56664	0.00207123	0.0617823	1.38052	0	0	0.0209495	0.0221671	0
ENSMUSG00000075012	Fjx1	TRUE	-0.324386	0.798638	5.10748	0.00209987	0.0623386	27.4526	33.0128	31.1204	40.0555	38.0165	36.582
ENSMUSG00000020460	Rps27a	TRUE	0.352047	1.27637	9.60849	0.00210001	0.0623386	800.404	897.536	874.288	621.656	649.052	744.507
ENSMUSG00000030739	Myh14	TRUE	0.939069	1.91729	0.729727	0.00209853	0.0623386	2.18911	2.53945	1.81223	1.02653	1.01969	1.34956
ENSMUSG00000083061	Gm12191	FALSE	-0.697931	0.616455	1.38008	0.00210966	0.0624616	1.89328	1.56448	2.16635	3.70806	2.57138	2.86106
ENSMUSG00000091509	Gm17066	FALSE	-0.471696	0.721117	3.9241	0.00211111	0.0624616	13.4305	14.5565	13.0397	15.9845	20.305	20.5853
ENSMUSG00000056919	4922501C03Rik	TRUE	-0.233088	0.850812	6.16788	0.00211769	0.0624616	69.5978	69.1093	68.5941	79.9014	83.3704	80.3977
ENSMUSG00000038671	Arfrp1	TRUE	0.259799	1.19731	5.82555	0.00211692	0.0624616	58.8495	60.3572	61.5118	47.5344	52.403	50.9953
ENSMUSG00000090210	Itga10	TRUE	0.594146	1.50958	2.43173	0.0021242	0.0625539	6.46871	7.11952	8.45709	4.98598	4.92109	4.69646
ENSMUSG00000082072	Gm15785	FALSE	1.86204	3.63521	-2.01772	0.00212897	0.0625943	0.315547	0.24941	0.187472	0.125697	0.0221671	0.0539824
ENSMUSG00000074415	2610203C20Rik	FALSE	-0.610797	0.654835	7.52458	0.00213739	0.0627421	136.178	129.036	170.433	232.456	252.306	180.553
ENSMUSG00000020811	Wscd1	TRUE	-0.367692	0.775021	5.73124	0.00215347	0.0628309	42.1255	44.4177	47.1805	61.6125	59.0974	51.859
ENSMUSG00000035126	Wdr78	TRUE	-0.329469	0.79583	4.37988	0.00215743	0.0628309	20.1753	19.4086	20.7261	26.124	24.9158	24.7599
ENSMUSG00000075595	Zfp652	TRUE	-0.232531	0.851141	6.7235	0.00214544	0.0628309	103.716	94.9119	101.131	117.904	124.113	110.268
ENSMUSG00000039356	Exosc2	TRUE	0.323256	1.25115	6.07562	0.00215147	0.0628309	74.9621	76.5462	72.0519	54.6154	59.5408	64.4909
ENSMUSG00000021680	Crhbp	TRUE	2.46449	5.51931	-1.28211	0.00215551	0.0628309	1.55801	0.453473	0.291624	0.0628485	0.110835	0.233924
ENSMUSG00000016528	Mapkapk2	TRUE	0.244806	1.18493	7.02169	0.00217057	0.0629734	140.379	139.08	126.773	114.447	110.835	117.52
ENSMUSG00000062510	Nsl1	TRUE	0.245275	1.18532	5.88919	0.00217255	0.0629734	62.5966	66.1163	64.8654	53.2118	54.7083	55.3679
ENSMUSG00000044424	Gm9493	TRUE	0.755584	1.68831	1.63333	0.00217159	0.0629734	3.29352	4.51205	3.99941	2.61869	2.28321	2.08732
ENSMUSG00000068551	Zfp467	TRUE	-0.470299	0.721815	4.61295	0.00217761	0.063021	21.2205	19.0232	21.9759	31.5709	28.1522	26.5053
ENSMUSG00000097928	AC136147.1	FALSE	-1.13723	0.454631	-0.110736	0.00218952	0.0630792	0.59165	0.476147	0.645738	1.55026	1.30786	0.935694
ENSMUSG00000053141	Ptprt	TRUE	-0.790111	0.5783	2.53176	0.00219269	0.0630792	3.5499	4.01323	5.31172	8.33791	7.4038	6.53186
ENSMUSG00000020457	Drg1	TRUE	0.273385	1.20864	7.0961	0.00218314	0.0630792	142.568	157.695	141.979	116.668	121.786	127.398
ENSMUSG00000026857	Ntmt1	TRUE	0.302239	1.23306	5.39489	0.00219329	0.0630792	43.2694	43.7148	45.4516	35.0276	36.0215	36.3481
ENSMUSG00000081051	Gm15427	FALSE	-0.640608	0.641443	2.77132	0.00220537	0.0631318	5.00931	6.32595	5.645	10.0977	8.06881	8.29529
ENSMUSG00000025791	Pgm2	TRUE	-0.352214	0.783381	5.58299	0.00220215	0.0631318	36.2287	44.8031	42.5771	51.0959	55.7502	50.9234
ENSMUSG00000018669	Cdk5rap3	TRUE	0.252655	1.1914	5.77661	0.00220251	0.0631318	58.3564	58.6114	57.7623	46.2984	50.8956	49.4658
ENSMUSG00000048373	Fgfbp1	TRUE	-1.26793	0.415255	-0.953311	0.00224649	0.0642092	0.0986084	0.294757	0.541587	1.00558	0.731513	0.521829
ENSMUSG00000022494	Shisa9	TRUE	1.40084	2.64055	-1.08026	0.00225221	0.0642733	0.374712	0.906946	0.916532	0.209495	0.465508	0.161947
ENSMUSG00000031837	Necab2	TRUE	0.451878	1.36782	4.67327	0.00226281	0.0644762	36.4654	27.4578	23.4549	23.3378	19.6844	20.8732
ENSMUSG00000001995	Sipa1l2	TRUE	-0.328507	0.79636	6.03743	0.00227982	0.0648209	54.9643	57.523	59.2829	79.9852	69.4716	66.2543
ENSMUSG00000086711	Gm15482	FALSE	3.18868	9.11779	-2.4353	0.00228193	0.0648209	1.00581	0.158716	0.0208303	0.041899	0.0665012	0.0179941
ENSMUSG00000036565	Ttyh3	TRUE	-0.32324	0.799273	8.22129	0.00228801	0.0648938	251.944	251.768	279.5	355.597	326.654	297.695
ENSMUSG00000029810	Tmem176b	TRUE	-0.669487	0.62873	3.47067	0.00232024	0.065506	9.60446	7.00616	8.76954	17.8071	12.5466	10.0587
ENSMUSG00000062383	B130024G19Rik	TRUE	0.956224	1.94023	-0.26113	0.00231434	0.065506	1.49885	0.929619	1.04151	0.586586	0.53201	0.665782
ENSMUSG00000061815	Rufy4	TRUE	1.20256	2.30148	-0.798949	0.00231861	0.065506	1.24247	0.725557	0.437436	0.293293	0.332506	0.413865
ENSMUSG00000029287	Tgfbr3	TRUE	-0.440352	0.736955	4.09686	0.00235644	0.0664265	14.9885	14.4204	14.7687	25.0975	17.8002	17.0764
ENSMUSG00000043557	Mdga1	TRUE	-0.390701	0.762759	4.92287	0.00236198	0.0664812	27.5906	25.009	28.6208	36.7664	37.1742	32.5873
ENSMUSG00000020823	Sec14l1	TRUE	-0.214962	0.861569	6.68684	0.00236677	0.0665145	97.6026	95.8868	95.1526	117.611	106.291	111.114
ENSMUSG00000039253	Fn3krp	TRUE	-0.339459	0.790338	4.63043	0.00238303	0.0668697	21.8911	22.4923	22.455	26.6268	29.5487	28.3947
ENSMUSG00000025103	Btbd1	TRUE	-0.227044	0.854384	6.68236	0.00240028	0.0672517	91.6664	101.646	95.5693	108.56	113.739	115.756
ENSMUSG00000032352	Lrrc1	TRUE	-0.389324	0.763487	5.50416	0.00241036	0.0673297	33.1127	41.2887	42.0563	48.0163	54.7305	49.7717
ENSMUSG00000071984	Fndc1	TRUE	2.6528	6.28885	0.321805	0.00240742	0.0673297	0.552207	3.06094	2.2705	0.272344	0.332506	0.323894
ENSMUSG00000017765	Slc12a4	TRUE	0.380382	1.30169	3.8367	0.0024232	0.0675859	16.3295	15.0326	16.6642	12.4021	12.1919	12.308
ENSMUSG00000078591	Hs3st4	TRUE	1.44585	2.72424	-1.59098	0.00243065	0.0676917	0.47332	0.430799	0.374945	0.188546	0.133002	0.143953
ENSMUSG00000037012	Hk1	TRUE	-0.27759	0.824968	5.64534	0.00245433	0.0682481	45.3599	43.8962	47.5138	57.1293	54.3537	54.3242
ENSMUSG00000079259	Trim71	TRUE	0.830538	1.77835	5.01251	0.00246266	0.0683508	47.6278	43.8282	36.328	19.2107	22.7212	29.9062
ENSMUSG00000065642	Snora69	FALSE	1.06067	2.0859	-0.506679	0.00246542	0.0683508	0.650815	0.952293	0.979022	0.230445	0.53201	0.467847
ENSMUSG00000020029	Nudt4	TRUE	-0.291609	0.81699	7.76009	0.00249179	0.0688769	180.394	191.547	209.844	240.165	235.636	236.299
ENSMUSG00000038690	Atp5j2	TRUE	0.284955	1.21837	6.90201	0.00249396	0.0688769	122.748	129.852	134.668	110.928	101.902	105.014
ENSMUSG00000068323	Slc4a5	TRUE	1.84445	3.59115	0.168864	0.00249932	0.0688769	5.87706	0.521494	0.854041	0.921779	0.465508	0.629794
ENSMUSG00000028298	Cga	TRUE	5.39696	42.1354	-3.94828	0.00249677	0.0688769	0.295825	0	0	0	0	0
ENSMUSG00000000861	Bcl11a	TRUE	-0.598611	0.66039	6.36345	0.00253593	0.0694711	61.8472	63.0554	70.6146	101.186	111.5	83.4027
ENSMUSG00000013921	Clip3	TRUE	-0.234483	0.84999	7.12585	0.00253079	0.0694711	128.684	127.403	129.273	153.078	152.62	147.696
ENSMUSG00000020219	Timm13	TRUE	0.276583	1.21132	5.94877	0.00252465	0.0694711	62.2416	70.2429	64.5322	54.6992	51.4054	56.4835
ENSMUSG00000027577	Chrna4	TRUE	0.492251	1.40664	3.95278	0.00253565	0.0694711	20.8458	16.121	16.81	13.3239	11.2609	13.6395
ENSMUSG00000093445	Lrch4	TRUE	1.88921	3.70433	-2.57783	0.00255339	0.0697422	0.216938	0.181389	0.145812	0.041899	0.0665012	0.0359882
ENSMUSG00000024041	Cryaa	TRUE	5.39684	42.1319	-3.98536	0.00255117	0.0697422	0.295825	0	0	0	0	0
ENSMUSG00000084416	Rpl10a-ps1	FALSE	-0.496845	0.708655	3.3525	0.00258257	0.070435	8.14505	11.0874	8.16546	14.1619	12.1254	12.344
ENSMUSG00000090553	Snrpe	TRUE	0.271299	1.20689	7.3265	0.00259479	0.0706641	163.848	176.174	174.974	133.784	140.916	151.96
ENSMUSG00000061013	Mkx	TRUE	-0.506994	0.703687	3.30412	0.00261246	0.0707281	6.98147	8.4346	8.70705	12.5278	11.2609	10.4906
ENSMUSG00000082284	H3f3a-ps1	FALSE	0.769624	1.70483	2.27679	0.00260758	0.0707281	5.54179	5.91782	5.08258	3.43572	3.05906	3.20295
ENSMUSG00000028417	Tal2	TRUE	2.12657	4.36677	2.29132	0.0026067	0.0707281	2.83992	12.2211	9.79022	1.08937	1.72903	2.86106
ENSMUSG00000004651	Tyr	TRUE	4.63668	24.8759	-1.08372	0.00261112	0.0707281	4.59515	0	0	0.104748	0	0.0719765
ENSMUSG00000022676	Snai2	TRUE	-0.750605	0.594354	2.80313	0.00262872	0.071064	5.77845	5.19226	5.76998	12.5697	8.62299	6.99971
ENSMUSG00000051236	Msrb3	TRUE	-0.38742	0.764496	5.73476	0.00264442	0.071384	40.8436	49.3832	48.7428	60.984	64.8165	55.9797
ENSMUSG00000000384	Tbrg4	TRUE	0.245199	1.18526	6.25999	0.00265443	0.0715495	77.6048	82.0559	81.8421	63.1209	67.6982	72.8762
ENSMUSG00000072722	Gm6588	TRUE	-1.82469	0.282302	-2.28377	0.0026817	0.0718802	0.11833	0.0453473	0.0833211	0.356142	0.37684	0.179941
ENSMUSG00000035000	Dpp4	TRUE	-1.30475	0.40479	0.556954	0.00269395	0.0718802	0.926919	0.74823	0.833211	2.97483	1.9507	1.29558
ENSMUSG00000030701	Plekhb1	TRUE	-0.712432	0.610291	1.40066	0.00268437	0.0718802	2.01161	1.85924	2.02054	3.33097	3.72407	2.62714
ENSMUSG00000078193	Gm2000	TRUE	-0.614791	0.653024	2.07911	0.0026742	0.0718802	3.37241	3.96789	3.47865	6.57815	5.07626	4.91239
ENSMUSG00000085069	Gm13111	FALSE	-0.535354	0.689989	3.39076	0.0026927	0.0718802	6.35038	8.27588	10.0194	11.4803	13.1007	11.1384
ENSMUSG00000049807	Arhgap23	TRUE	-0.467427	0.723253	4.482	0.0026883	0.0718802	18.4595	15.3727	21.1219	29.5807	23.8961	22.5466
ENSMUSG00000047003	Zfp41	TRUE	0.221762	1.16616	7.55378	0.00268168	0.0718802	220.902	199.777	193.93	175.536	169.844	181.651
ENSMUSG00000031727	Pmfbp1	TRUE	2.01037	4.02884	-2.43696	0.00270916	0.0721818	0.631094	0.181389	0.166642	0.0209495	0.0886683	0.125959
ENSMUSG00000038679	Trps1	TRUE	-0.224847	0.855686	6.0853	0.0027301	0.0726348	64.2729	65.4361	67.1568	72.2339	80.2448	77.5906
ENSMUSG00000031591	Asah1	TRUE	-0.217626	0.859979	6.16934	0.00273638	0.0726971	67.1918	68.6104	67.2818	81.7031	77.5626	76.8889
ENSMUSG00000042605	Atxn2	TRUE	-0.235395	0.849452	6.58121	0.00276345	0.0732057	91.7847	84.7768	89.9867	106.424	107.732	99.7054
ENSMUSG00000025487	Psmd13	TRUE	0.234513	1.17651	7.37959	0.00275982	0.0732057	174.892	181.389	177.078	144.803	148.785	159.698
ENSMUSG00000038677	Scube3	TRUE	0.548502	1.46257	7.14182	0.00277187	0.0733235	204.75	165.971	136.855	130.117	87.0058	129.9
ENSMUSG00000029816	Gpnmb	TRUE	2.42057	5.35383	0.0123566	0.0027958	0.0738508	6.74481	0.204063	0.291624	0.649435	0.266005	0.431859
ENSMUSG00000009621	Vav2	TRUE	0.308806	1.23868	6.27621	0.00281715	0.0743085	93.9935	83.0082	77.926	64.8387	66.213	74.7296
ENSMUSG00000045725	Prr15	TRUE	-0.727029	0.604147	1.28189	0.0028432	0.0748884	1.85384	1.76854	1.87472	3.56142	3.28073	2.28525
ENSMUSG00000094845	Tmem95	TRUE	1.29414	2.4523	-1.85062	0.00284892	0.0749323	0.276103	0.408126	0.562417	0.188546	0.110835	0.197935
ENSMUSG00000020264	Slc36a2	TRUE	2.22614	4.67882	-2.54652	0.00285426	0.0749658	0.295825	0.204063	0.0833211	0.041899	0	0.0719765
ENSMUSG00000034485	Uaca	TRUE	-0.278922	0.824207	6.39095	0.00287498	0.075403	82.693	75.5486	74.364	106.13	89.2446	86.8936
ENSMUSG00000080364	Gm25777	FALSE	0.713149	1.63938	1.37309	0.00290073	0.0759704	3.01742	2.97025	3.39533	1.86451	1.8177	2.03334
ENSMUSG00000049313	Sorl1	TRUE	-0.564073	0.67639	4.83654	0.002905	0.0759743	19.3272	21.4719	25.8295	38.3586	33.3393	26.8292
ENSMUSG00000020661	Dnmt3a	TRUE	-0.274995	0.826453	8.02026	0.00292045	0.0762705	225.971	228.029	256.525	297.567	291.763	270.434
ENSMUSG00000058756	Thra	TRUE	-0.63416	0.644316	5.8323	0.00293624	0.0765744	40.8436	40.6085	51.7007	79.1892	69.1169	58.3729
ENSMUSG00000032238	Rora	TRUE	-0.487803	0.71311	3.52155	0.00298416	0.0774958	7.80978	9.34154	11.1859	13.5334	14.1204	12.092
ENSMUSG00000038976	Ppp1r9b	TRUE	-0.219582	0.858814	6.9822	0.00298366	0.0774958	117.581	118.946	118.024	140.32	134.399	138.105
ENSMUSG00000030256	Bhlhe41	TRUE	1.09406	2.13475	0.251418	0.00297797	0.0774958	2.80048	1.36042	0.999853	0.775132	0.53201	1.09764
ENSMUSG00000035027	Map2k2	TRUE	0.220626	1.16524	6.76921	0.00301263	0.0781253	114.662	114.933	108.442	97.918	91.2175	100.911
ENSMUSG00000032487	Ptgs2	TRUE	-1.58516	0.333289	-2.00899	0.00302612	0.0782647	0.11833	0.181389	0.0416605	0.502788	0.199504	0.323894
ENSMUSG00000059336	Slc14a1	TRUE	-0.781141	0.581906	1.46132	0.00303072	0.0782647	1.95245	1.31507	2.45797	3.41477	3.41373	3.04101
ENSMUSG00000040688	Tbl3	TRUE	0.2484	1.18789	6.49671	0.00302761	0.0782647	94.7824	92.6899	89.0494	75.7534	76.0109	80.9915
ENSMUSG00000029658	Wdr95	TRUE	-2.03027	0.244809	-2.17506	0.00304114	0.0784241	0.0394434	0.0906946	0.0624908	0.314243	0.310339	0.179941
ENSMUSG00000019907	Ppp1r12a	TRUE	-0.277781	0.824859	6.34173	0.00305815	0.0787527	81.4702	71.558	73.8641	91.9893	94.4982	88.639
ENSMUSG00000051022	Hs3st1	TRUE	-1.00652	0.497745	0.883141	0.00306513	0.0788003	1.53829	0.816251	1.33314	3.18433	2.26104	1.99735
ENSMUSG00000026520	Pycr2	TRUE	0.299875	1.23104	5.64675	0.00307238	0.0788003	51.7694	57.0922	52.4506	42.6951	41.9401	46.3528
ENSMUSG00000001496	Nkx2-1	TRUE	3.00735	8.04087	4.12995	0.0030728	0.0788003	20.905	38.3411	42.8687	0.0209495	9.022	3.65281
ENSMUSG00000041881	Ndufa7	TRUE	0.219948	1.16469	6.09617	0.00308134	0.0789095	72.1813	72.5783	72.5935	64.8806	58.1442	63.5552
ENSMUSG00000032411	Tfdp2	TRUE	0.272034	1.20751	7.16494	0.00309131	0.0790555	163.177	158.602	155.852	113.484	143.31	138.753
ENSMUSG00000024975	Pdcd4	TRUE	-0.494736	0.709692	5.85569	0.00309693	0.0790896	51.0791	44.5991	50.8258	74.9574	71.8656	59.6505
ENSMUSG00000038112	AW551984	TRUE	-0.684598	0.622179	3.33116	0.00312849	0.0794262	7.2773	7.02883	7.45723	15.1046	10.7732	9.12302
ENSMUSG00000029661	Col1a2	TRUE	-0.499328	0.707436	7.84494	0.00311451	0.0794262	170.218	180.414	225.404	360.813	217.858	235.597
ENSMUSG00000025931	Paqr8	TRUE	-0.37473	0.77125	4.00442	0.00312038	0.0794262	16.4873	14.3751	13.4772	18.8755	20.172	18.48
ENSMUSG00000038900	Rpl12	TRUE	0.362741	1.28587	9.60192	0.00312673	0.0794262	807.346	894.158	849.437	620.797	637.414	725.577
ENSMUSG00000015134	Aldh1a3	TRUE	3.30224	9.86449	1.62351	0.00313162	0.0794262	26.5257	0.430799	0.604078	0.691334	1.39653	0.701771
ENSMUSG00000003992	Ssbp2	TRUE	-0.227201	0.854291	6.1479	0.00314141	0.0795651	65.5549	64.96	67.0318	78.6445	79.4468	73.2001
ENSMUSG00000020701	Tmem132e	TRUE	0.658621	1.57857	1.39847	0.00315249	0.0797365	3.70768	3.03827	3.02039	1.78071	2.17237	2.23127
ENSMUSG00000024044	Epb4.1l3	TRUE	-0.311361	0.805881	6.5416	0.00318065	0.0803386	78.512	85.457	91.2157	106.444	105.382	104.816
ENSMUSG00000032259	Drd2	TRUE	1.30299	2.46739	-1.76389	0.00320829	0.080926	0.532485	0.408126	0.312454	0.146647	0.177337	0.179941
ENSMUSG00000032549	Rab6b	TRUE	-0.456374	0.728816	5.93466	0.0032163	0.0809915	45.6754	48.2042	60.4494	74.3708	77.6956	59.7225
ENSMUSG00000030122	Ptms	TRUE	-0.285119	0.820674	8.33252	0.00321966	0.0809915	275.295	289.701	319.161	346.149	367.574	363.625
ENSMUSG00000098087	RP23-356G2.1	FALSE	-1.15763	0.448247	1.41896	0.00324853	0.0816065	1.3608	1.26972	2.12469	4.4832	3.59107	2.55516
ENSMUSG00000021217	Tshz3	TRUE	-0.605929	0.657048	3.81363	0.00326605	0.0817108	9.28891	11.949	12.4357	18.268	18.975	14.0174
ENSMUSG00000002602	Axl	TRUE	-0.375302	0.770944	5.53219	0.00326254	0.0817108	37.3726	39.6789	44.1185	56.6265	52.7355	47.8284
ENSMUSG00000028618	Tmem59	TRUE	0.278751	1.21314	6.14311	0.00327038	0.0817108	69.5189	77.8613	75.5514	59.4128	61.1368	63.1773
ENSMUSG00000023336	Wfdc1	TRUE	2.43281	5.39944	-1.02542	0.00326071	0.0817108	3.11602	0.204063	0.270793	0.314243	0.110835	0.233924
ENSMUSG00000053199	Arhgap20	TRUE	-0.713617	0.60979	3.65947	0.00330011	0.0822967	9.3678	9.95373	11.4358	21.2847	16.6696	12.5059
ENSMUSG00000066705	Fxyd6	TRUE	0.271828	1.20734	6.62762	0.00330274	0.0822967	108.627	103.392	100.735	85.2436	82.9048	90.8703
ENSMUSG00000028780	Sema3c	TRUE	-0.664039	0.631109	3.4735	0.00330956	0.0823124	8.93392	7.77706	7.72803	18.7079	8.99983	11.0304
ENSMUSG00000026147	Col9a1	TRUE	0.948653	1.93007	4.28982	0.00331229	0.0823124	45.0443	22.1748	19.7471	16.9272	10.5072	17.6162
ENSMUSG00000012443	Kif11	TRUE	-0.240367	0.84653	8.35304	0.00332361	0.0824827	300.44	312.057	287.353	330.562	361.545	370.841
ENSMUSG00000024037	Wdr4	TRUE	0.261885	1.19904	6.02996	0.00332822	0.0824863	68.8681	72.2382	69.5314	56.1028	59.5186	60.0284
ENSMUSG00000029026	Trp73	TRUE	-0.799207	0.574665	4.13604	0.00334466	0.0826717	8.08589	11.2461	18.2473	26.3335	21.2361	17.8322
ENSMUSG00000031377	Bmx	TRUE	1.72678	3.30987	-1.71827	0.0033415	0.0826717	0.433877	0.24941	0.395775	0.0837981	0.110835	0.125959
ENSMUSG00000030741	Spns1	TRUE	0.255223	1.19352	5.74812	0.00339567	0.0838203	59.9539	56.6161	53.992	48.2467	46.8169	47.8464
ENSMUSG00000025255	Zfhx4	TRUE	-0.321291	0.800353	7.26097	0.00342463	0.0844224	134.305	130.169	160.414	188.881	175.962	166.068
ENSMUSG00000081673	Gm14794	FALSE	1.21642	2.3237	-1.43928	0.00343232	0.0844991	0.414155	0.294757	0.520757	0.125697	0.243838	0.161947
ENSMUSG00000023051	Tarbp2	TRUE	0.251341	1.19031	5.68452	0.00344124	0.0845585	54.4318	54.6662	55.7834	46.8222	45.8858	45.813
ENSMUSG00000031950	Gabarapl2	TRUE	0.255224	1.19352	5.69392	0.00344389	0.0845585	54.3529	54.4394	55.1794	43.554	47.8809	45.957
ENSMUSG00000019518	Ap4m1	TRUE	0.271534	1.20709	5.25069	0.00346041	0.0848513	41.4352	41.3567	40.5149	33.3097	33.9378	34.8906
ENSMUSG00000045763	Basp1	TRUE	-0.344293	0.787694	7.70492	0.00350975	0.0858582	180.039	193.656	192.472	263.838	245.811	209.146
ENSMUSG00000024892	Pcx	TRUE	-0.342349	0.788756	4.74075	0.00351681	0.0858582	23.9027	23.3312	22.455	31.2776	28.2187	28.8626
ENSMUSG00000044408	Sptssa	TRUE	0.315167	1.24416	6.22156	0.0035118	0.0858582	76.4412	83.507	79.9049	59.6223	67.4322	65.7145
ENSMUSG00000039982	Dtx4	TRUE	0.387338	1.30798	7.53336	0.00352007	0.0858582	248.434	217.259	177.974	152.01	157.94	182.136
ENSMUSG00000042453	Reln	TRUE	-0.703473	0.614092	4.76132	0.00354735	0.0860949	21.8713	16.3704	24.3714	36.9968	40.5214	24.49
ENSMUSG00000038587	Akap12	TRUE	-0.44651	0.733816	7.18137	0.00354465	0.0860949	144.678	111.826	116.962	227.7	141.492	139.796
ENSMUSG00000061207	Stk19	TRUE	0.313304	1.24255	4.44735	0.00353531	0.0860949	24.5732	22.719	23.4132	18.1842	19.9725	18.7679
ENSMUSG00000088929	Gm24299	FALSE	0.675333	1.59697	1.75989	0.00354843	0.0860949	4.20072	4.76147	3.81194	2.2416	2.79305	2.95104
ENSMUSG00000092730	Snora24	FALSE	0.73276	1.66181	1.5174	0.00357807	0.0867001	3.51046	3.67313	2.74959	1.55026	2.26104	2.15929
ENSMUSG00000034168	Irf2bpl	TRUE	-0.367779	0.774975	6.04701	0.00361345	0.0868904	46.3459	59.4276	64.9488	80.907	71.8435	67.5319
ENSMUSG00000009647	Mcu	TRUE	-0.321646	0.800156	4.33146	0.00361718	0.0868904	17.5128	18.6151	17.7057	24.2595	21.5686	21.449
ENSMUSG00000029426	Scarb2	TRUE	-0.312093	0.805472	5.51341	0.00359278	0.0868904	41.5339	37.8877	41.3481	52.0386	52.3808	45.5791
ENSMUSG00000021743	Fezf2	TRUE	-0.284298	0.821141	5.93386	0.00359738	0.0868904	56.9759	55.9359	49.8677	68.7144	68.5628	61.0001
ENSMUSG00000029775	Klhdc10	TRUE	0.214587	1.16037	7.54053	0.00361374	0.0868904	204.731	200.458	192.576	164.37	175.475	175.299
ENSMUSG00000097187	RP23-399J8.10	TRUE	0.541835	1.45582	2.24379	0.00361886	0.0868904	5.66012	4.9882	5.62417	3.95946	3.5689	3.65281
ENSMUSG00000032357	Tinag	TRUE	1.55602	2.94042	-2.03529	0.00361162	0.0868904	0.433877	0.272084	0.249963	0.041899	0.133002	0.143953
ENSMUSG00000020153	Ndufs7	TRUE	0.30153	1.23245	5.29047	0.00362446	0.0869117	39.1278	43.5787	39.6817	33.8963	31.9649	33.4151
ENSMUSG00000064370	mt-Cytb	TRUE	-0.378614	0.769176	11.525	0.00363696	0.0870634	2693.96	2853.52	2693.73	3360.8	3513.53	3839.98
ENSMUSG00000020107	Anapc16	TRUE	0.252446	1.19122	5.45114	0.00364022	0.0870634	45.2415	47.524	45.1184	38.9242	39.9007	36.9419
ENSMUSG00000065701	Rny1	FALSE	-1.68851	0.310248	-1.80737	0.00369644	0.0877238	0.0986084	0.158716	0.166642	0.837981	0.310339	0.233924
ENSMUSG00000079164	Tlr5	TRUE	-1.07878	0.473429	-0.0152113	0.00370632	0.0877238	0.611372	0.49882	0.833211	1.88546	1.19702	1.04366
ENSMUSG00000067719	Gm10221	TRUE	-0.814051	0.568783	0.226619	0.0037039	0.0877238	0.867754	1.04299	0.916532	1.73881	1.9507	1.29558
ENSMUSG00000024617	Camk2a	TRUE	-0.482576	0.715698	4.81531	0.00367392	0.0877238	21.4769	21.4719	25.3921	30.4396	39.2579	25.8396
ENSMUSG00000064341	mt-Nd1	TRUE	-0.386672	0.764892	11.3092	0.00370579	0.0877238	2163.68	2455.56	2293.14	2716.63	2982.09	3338.3
ENSMUSG00000032303	Chrna3	TRUE	-0.385098	0.765727	3.87628	0.00370668	0.0877238	12.7599	12.5839	13.8313	16.8434	18.1105	16.2307
ENSMUSG00000034220	Gpc1	TRUE	-0.362696	0.77771	8.0719	0.00371059	0.0877238	212.777	236.033	238.861	311.519	296.086	276.624
ENSMUSG00000093587	Gm20554	FALSE	1.63615	3.10835	-1.02188	0.00371027	0.0877238	1.1833	0.362778	0.895701	0.293293	0.199504	0.287906
ENSMUSG00000030450	Oca2	TRUE	2.49064	5.62027	-1.60639	0.00369216	0.0877238	2.24827	0.181389	0.0624908	0.230445	0.0443341	0.161947
ENSMUSG00000000339	Rtca	TRUE	0.274117	1.20925	5.03443	0.00371969	0.0878265	36.1301	37.0487	34.9115	29.5598	30.0585	29.7623
ENSMUSG00000097520	AC102398.1	FALSE	-2.05222	0.241112	-2.8017	0.00376113	0.0885785	0.0197217	0.0453473	0.0416605	0.209495	0.0443341	0.197935
ENSMUSG00000041578	Crx	TRUE	5.08789	34.0101	-4.1012	0.00375867	0.0885785	0.23666	0	0	0	0	0
ENSMUSG00000027965	Olfm3	TRUE	-0.836879	0.559853	-0.220405	0.00376961	0.0886652	0.552207	0.49882	0.479096	0.984627	0.975351	0.791741
ENSMUSG00000059890	Ube4a	TRUE	-0.197107	0.872298	6.70658	0.00379417	0.0890159	102.612	94.3224	95.7359	114.699	111.146	109.728
ENSMUSG00000054667	Irs4	TRUE	1.56613	2.9611	5.06508	0.00379351	0.0890159	75.2974	51.4238	26.8502	13.6172	15.3839	22.8525
ENSMUSG00000081418	Gm14830	FALSE	1.2529	2.3832	-1.76763	0.00380062	0.089054	0.315547	0.362778	0.291624	0.0837981	0.110835	0.197935
ENSMUSG00000082896	Gm5844	FALSE	-0.625723	0.648095	1.37448	0.00380915	0.0891408	2.12994	2.19934	2.29133	2.97483	3.4359	3.79676
ENSMUSG00000034892	Rps29	TRUE	0.304041	1.2346	8.91018	0.00381991	0.0892795	499.254	534.282	535.421	446.581	418.137	406.109
ENSMUSG00000052429	Prmt1	TRUE	0.278078	1.21258	8.71412	0.00383556	0.0895319	445.947	465.535	448.476	363.139	362.365	395.997
ENSMUSG00000028332	Hemgn	TRUE	-0.703285	0.614172	4.87522	0.00386257	0.0897481	19.9978	15.5541	27.7876	37.5834	30.5462	35.0166
ENSMUSG00000020483	Dynll2	TRUE	0.241957	1.1826	8.1969	0.00385746	0.0897481	308.092	321.24	314.912	249.153	283.783	265.521
ENSMUSG00000028741	Mrto4	TRUE	0.275705	1.21059	6.2496	0.00385331	0.0897481	82.1999	84.6407	78.6967	63.7075	66.8116	72.2644
ENSMUSG00000059434	Gckr	TRUE	2.31353	4.97099	-2.50933	0.00386426	0.0897481	0.808589	0.113368	0.104151	0.125697	0.0221671	0.0539824
ENSMUSG00000053522	Lgals7	TRUE	-1.28073	0.411587	-1.36264	0.00387195	0.0898136	0.157773	0.226736	0.270793	0.628485	0.75368	0.233924
ENSMUSG00000078160	Gm16503	TRUE	0.681344	1.60363	1.61973	0.00387845	0.0898516	3.19491	3.94521	3.12454	2.074	1.57386	2.71711
ENSMUSG00000083183	Gm15575	FALSE	-1.32093	0.400277	-2.26984	0.00390425	0.0900598	0.157773	0.0906946	0.0833211	0.272344	0.288172	0.287906
ENSMUSG00000051727	Kctd14	TRUE	-1.00221	0.499236	-0.43799	0.00390478	0.0900598	0.453599	0.634862	0.458266	1.46647	0.842349	0.791741
ENSMUSG00000028896	Rcc1	TRUE	0.281557	1.21551	7.33701	0.0039024	0.0900598	168.699	187.488	166.6	131.626	144.95	153.472
ENSMUSG00000042529	Kcnj12	TRUE	1.51406	2.85613	-1.34892	0.00390695	0.0900598	1.22274	0.521494	0.229133	0.0837981	0.354673	0.251918
ENSMUSG00000035033	Tbr1	TRUE	-1.0862	0.470999	5.99935	0.00391894	0.0901143	37.6881	37.0034	45.9516	97.8342	97.4908	60.8381
ENSMUSG00000059401	Mamld1	TRUE	-0.471314	0.721307	5.17445	0.00391907	0.0901143	29.1486	30.0199	29.4957	43.9102	44.7997	34.2428
ENSMUSG00000064363	mt-Nd4	TRUE	-0.291752	0.816909	9.81963	0.00393555	0.0902006	849.63	908.238	812.172	1018.02	999.691	1128.29
ENSMUSG00000037570	Mcrs1	TRUE	0.198152	1.14723	6.54393	0.00393808	0.0902006	99.1014	95.1613	92.4447	80.8861	83.6364	85.3821
ENSMUSG00000035215	Lsm7	TRUE	0.296872	1.22848	5.23751	0.00394205	0.0902006	39.4828	39.9736	41.1398	33.6659	31.1226	33.3611
ENSMUSG00000063696	Gm8730	TRUE	0.513492	1.4275	2.58805	0.00394237	0.0902006	7.53368	6.66605	5.99912	4.58794	4.47775	5.07434
ENSMUSG00000074971	Fibin	TRUE	-1.29554	0.407383	-0.231596	0.00396223	0.090217	0.433877	0.340105	0.583247	1.69691	0.975351	0.683776
ENSMUSG00000080776	Gm12174	FALSE	-0.627987	0.647079	1.37776	0.00395927	0.090217	2.03133	2.51677	1.89555	3.14243	3.21423	3.58083
ENSMUSG00000088007	Gm24785	FALSE	1.54869	2.92551	-2.21097	0.00395023	0.090217	0.197217	0.317431	0.208303	0.0628485	0.0443341	0.125959
ENSMUSG00000072945	Ripply1	TRUE	2.28444	4.87176	-2.99961	0.00396263	0.090217	0.335269	0.181389	0.0833211	0.0209495	0	0.0899706
ENSMUSG00000078958	Atp6ap1l	TRUE	-2.30386	0.20252	-3.01119	0.00398515	0.0903954	0	0.0226736	0.0624908	0.167596	0.133002	0.143953
ENSMUSG00000014294	Ndufa2	TRUE	0.274571	1.20963	5.76594	0.00398048	0.0903954	54.7671	58.0672	60.4911	50.8235	46.7282	45.741
ENSMUSG00000028672	Hmgcl	TRUE	0.314522	1.2436	4.74612	0.00398457	0.0903954	28.695	29.181	27.9334	23.254	22.2114	23.5183
ENSMUSG00000081824	BC002163	FALSE	-1.07782	0.473745	-1.30283	0.00400911	0.0908272	0.295825	0.385452	0.187472	0.649435	0.687179	0.503835
ENSMUSG00000071550	Wdr52	TRUE	-0.637717	0.642729	1.91803	0.00410021	0.0926638	2.56382	3.06094	3.58281	5.50972	4.94326	3.88673
ENSMUSG00000022656	Pvrl3	TRUE	-0.204455	0.867867	7.83709	0.0040994	0.0926638	218.28	214.538	210.136	247.602	244.325	248.913
ENSMUSG00000019971	Cep290	TRUE	-0.307512	0.808034	4.93188	0.00411151	0.0928054	29.5431	29.5211	25.9962	36.8083	31.8097	36.618
ENSMUSG00000023979	Guca1b	TRUE	0.905648	1.87339	-0.114112	0.00415831	0.0936329	1.93272	0.906946	1.04151	0.796082	0.576344	0.701771
ENSMUSG00000080951	Gm12208	FALSE	0.938164	1.91609	-0.781339	0.00415713	0.0936329	0.749424	0.634862	0.520757	0.251394	0.421174	0.323894
ENSMUSG00000030787	Lyve1	TRUE	-1.45018	0.365975	0.132966	0.00418908	0.0942108	0.512764	0.612188	0.541587	2.59774	1.30786	0.665782
ENSMUSG00000015126	Tsr3	TRUE	0.311783	1.24124	4.70431	0.00420879	0.094539	28.0442	29.8839	28.0792	21.8713	23.9626	23.4463
ENSMUSG00000047459	Dynlrb1	TRUE	-0.215002	0.861545	6.25401	0.00423946	0.0951122	66.8368	71.3086	75.0098	88.5536	80.1561	78.7063
ENSMUSG00000042757	Tmem108	TRUE	-0.559451	0.67856	3.18402	0.00425219	0.095282	7.23786	6.57536	8.64456	13.4286	10.6845	9.01505
ENSMUSG00000022792	Yars2	TRUE	0.328411	1.25563	5.07335	0.00426861	0.095534	34.8285	39.5655	37.2029	28.1561	29.7039	30.9859
ENSMUSG00000061808	Ttr	TRUE	-2.70688	0.153161	-0.740251	0.00429711	0.0960339	0.23666	0.0680209	0.124982	2.49299	0.155169	0.215929
ENSMUSG00000097907	AC152076.1	FALSE	3.86774	14.5984	-3.54362	0.00430134	0.0960339	0.315547	0.0680209	0	0	0	0.0179941
ENSMUSG00000071604	Fam189a2	TRUE	0.879986	1.84036	1.76539	0.00431379	0.0961955	5.50235	4.44403	3.27035	1.75976	2.12804	3.27493
ENSMUSG00000026452	Syt2	TRUE	0.729385	1.65793	1.85299	0.00433754	0.0966083	6.35038	4.6481	3.29118	2.70249	2.83739	3.07699
ENSMUSG00000050334	C130071C03Rik	FALSE	-0.443781	0.735205	8.35735	0.0043525	0.0968247	225.498	285.212	297.644	353.544	407.12	338.829
ENSMUSG00000021366	Hivep1	TRUE	-0.274152	0.826936	6.37538	0.00436037	0.0968831	79.8728	67.4541	76.6554	94.3776	92.2594	84.3024
ENSMUSG00000030744	Rps3	TRUE	0.330936	1.25783	10.0091	0.00436716	0.0969173	1080.08	1185.31	1120.08	881.535	862.92	947.03
ENSMUSG00000097767	Miat	FALSE	0.412262	1.33077	9.93099	0.00437296	0.0969296	1304.81	996.96	1052.49	780.809	939.241	800.522
ENSMUSG00000038668	Lpar1	TRUE	-0.331372	0.79478	5.76152	0.00439654	0.0973355	48.2787	48.0001	50.5342	66.0329	56.8364	61.8458
ENSMUSG00000072568	Fam84b	TRUE	-0.265287	0.832033	5.98785	0.00441445	0.097615	55.8123	59.2689	56.0126	74.0984	65.016	66.5063
ENSMUSG00000019823	Mical1	TRUE	0.25581	1.19401	5.32933	0.00442757	0.0977878	44.4132	41.4247	43.9102	36.3684	36.3097	36.0062
ENSMUSG00000031772	Cntnap4	TRUE	-1.23605	0.424533	-0.349255	0.00444834	0.0981291	0.453599	0.204063	0.624908	1.31982	0.75368	0.971682
ENSMUSG00000031409	Tceal6	TRUE	-0.702112	0.614672	0.756907	0.0044893	0.0989146	1.24247	1.17903	1.20816	1.82261	2.0172	2.06932
ENSMUSG00000024972	Lgals12	TRUE	-1.5103	0.351038	-1.61127	0.00450157	0.0989487	0.0986084	0.226736	0.0624908	0.41899	0.399007	0.287906
ENSMUSG00000026989	Dapl1	TRUE	2.98188	7.90016	-2.44992	0.00450019	0.0989487	1.20302	0.0453473	0.0416605	0.0209495	0.0443341	0.0899706
ENSMUSG00000038256	Bcl9	TRUE	-0.214065	0.862105	7.45888	0.0045333	0.0992917	170.533	157.151	161.268	195.585	190.858	180.787
ENSMUSG00000000581	C1d	TRUE	0.256678	1.19472	6.01062	0.00452365	0.0992917	66.2451	70.5604	68.4482	52.9813	55.5507	63.1953
ENSMUSG00000053656	Dancr	FALSE	0.446331	1.36257	4.20445	0.00453071	0.0992917	18.5384	23.5126	20.4345	14.7485	15.3618	15.7269
ENSMUSG00000049300	Prmt6	TRUE	0.279929	1.21414	5.0031	0.00454249	0.099375	32.9944	36.1645	34.7032	29.2874	27.9527	28.2868
ENSMUSG00000062421	Arf2	TRUE	0.209762	1.1565	6.63581	0.00455805	0.0995974	105.55	109.695	107.567	87.4433	93.2569	98.3738
ENSMUSG00000049608	Gpr55	TRUE	-1.91057	0.265987	-2.70399	0.00460469	0.099829	0.0394434	0.0226736	0.0833211	0.335192	0.133002	0.107965
ENSMUSG00000070570	Slc17a7	TRUE	-0.940758	0.520959	2.56905	0.00457759	0.099829	3.64851	3.83185	4.43685	9.07114	7.93581	5.88408
ENSMUSG00000019899	Lama2	TRUE	-0.823309	0.565144	4.38979	0.00460489	0.099829	15.166	13.6042	17.5807	38.0653	23.3863	20.5853
ENSMUSG00000056608	Chd9	TRUE	-0.295097	0.815018	6.46632	0.00460859	0.099829	81.135	73.9387	87.3205	100.348	105.537	91.5901
ENSMUSG00000064373	Sepp1	TRUE	-0.252976	0.839164	5.61297	0.00458448	0.099829	48.3181	45.3473	46.7431	60.8164	52.1813	54.3422
ENSMUSG00000031349	Nsdhl	TRUE	-0.238248	0.847774	5.86448	0.00459305	0.099829	54.3529	55.1196	53.8879	67.4574	66.1022	59.1827
ENSMUSG00000009681	Bcr	TRUE	-0.208705	0.865314	6.3587	0.00461226	0.099829	73.1871	73.5306	75.4056	86.9614	88.2693	81.5134
ENSMUSG00000053332	Gas5	FALSE	0.250207	1.18938	7.95894	0.00460682	0.099829	257.151	290.903	271.897	218.881	229.717	240.743
ENSMUSG00000079562	Maea	TRUE	0.299832	1.231	7.11903	0.00461731	0.099829	152.311	155.133	141.542	118.595	116	130.097
ENSMUSG00000029621	Arpc1a	TRUE	0.21763	1.16282	6.41598	0.00462396	0.099856	93.2835	90.1958	87.4871	76.5495	75.4345	81.0095
ENSMUSG00000055639	Dach1	TRUE	-0.265323	0.832013	7.10336	0.00464387	0.100169	118.547	128.854	121.753	139.88	158.65	145.159
ENSMUSG00000042354	Gnl3	TRUE	0.30847	1.23839	7.05233	0.00468365	0.100909	138.348	158.806	144.854	102.527	121.032	133.3
ENSMUSG00000047085	Lrrc4b	TRUE	-0.373431	0.771945	5.66283	0.00472706	0.101726	40.6858	45.2793	44.4101	58.4701	58.0112	52.4169
ENSMUSG00000067321	Gm7931	FALSE	0.835653	1.78467	-0.248153	0.00473623	0.101804	1.00581	0.884272	0.874871	0.544687	0.620678	0.395871
ENSMUSG00000027187	Cat	TRUE	-0.185239	0.879503	6.92928	0.00476067	0.101973	113.518	115.159	112.9	129.74	131.14	127.506
ENSMUSG00000022437	Samm50	TRUE	0.223351	1.16744	6.57439	0.0047543	0.101973	99.8706	102.938	98.4647	85.914	84.2349	87.8833
ENSMUSG00000097518	AC159277.1	FALSE	0.646103	1.56494	3.46147	0.00476033	0.101973	11.478	14.2844	13.3939	6.36865	8.22398	10.4006
ENSMUSG00000032537	Ephb1	TRUE	0.498915	1.41315	4.73965	0.00477407	0.102069	32.2252	30.6094	30.3705	18.1213	25.6916	22.1508
ENSMUSG00000002266	Zim1	TRUE	0.739585	1.6697	1.85174	0.0047762	0.102069	6.66593	3.49174	4.77013	2.93293	3.10339	2.91505
ENSMUSG00000028031	Dkk2	TRUE	-1.22029	0.429195	3.84579	0.00482354	0.102962	13.6474	6.6207	9.43611	35.4675	18.9307	14.8451
ENSMUSG00000064563	Snora7a	FALSE	0.651136	1.5704	0.799437	0.00484558	0.103313	1.97217	2.29004	1.83306	1.25697	1.26352	1.34956
ENSMUSG00000005124	Wisp1	TRUE	-0.649022	0.637712	3.15868	0.00487482	0.103816	5.22624	7.27824	7.68637	14.2876	9.64268	7.73747
ENSMUSG00000043518	Rai2	TRUE	-0.79034	0.578208	0.847942	0.0049038	0.103871	1.04525	1.36042	1.18733	2.70249	2.0837	1.43953
ENSMUSG00000034488	Edil3	TRUE	-0.647535	0.63837	4.66251	0.00490447	0.103871	17.3748	19.5674	24.2464	39.9298	27.5315	28.3947
ENSMUSG00000039410	Prdm16	TRUE	-0.336128	0.792164	6.1755	0.00490256	0.103871	48.752	61.2642	70.2605	74.5593	84.6339	68.3956
ENSMUSG00000025508	Rplp2	TRUE	0.258678	1.19638	8.96697	0.00490086	0.103871	528.403	543.827	534.838	427.077	451.854	464.32
ENSMUSG00000014846	Tppp3	TRUE	0.50459	1.41872	3.07149	0.00490553	0.103871	12.326	9.43224	8.85286	5.88681	7.62547	8.06136
ENSMUSG00000027967	Neurog2	TRUE	-0.569675	0.673769	5.83839	0.00491898	0.104037	48.2984	47.2292	43.8269	85.3274	65.6145	55.9077
ENSMUSG00000059070	Rpl18	TRUE	0.27435	1.20945	9.04517	0.004941	0.104383	551.911	583.688	536.879	455.296	435.716	491.779
ENSMUSG00000067724	Gbx1	TRUE	1.07045	2.10009	-0.112774	0.00494715	0.104393	1.00581	1.36042	1.85389	0.670384	0.554177	0.773747
ENSMUSG00000053198	Prx	TRUE	0.366063	1.28883	3.64732	0.00497422	0.104845	13.3713	14.2164	13.498	10.8099	10.7954	10.2746
ENSMUSG00000025969	Nrp2	TRUE	-0.56826	0.67443	6.32737	0.004984	0.104931	64.7463	57.4777	75.5514	122.429	91.55	79.3001
ENSMUSG00000025574	Tk1	TRUE	0.216383	1.16182	6.4503	0.00500884	0.105334	87.9192	91.3748	88.1745	74.0356	77.5182	78.6343
ENSMUSG00000065047	Gm24045	FALSE	-1.42255	0.373053	-2.16808	0.00503234	0.105591	0.0788867	0.113368	0.0624908	0.188546	0.288172	0.215929
ENSMUSG00000027613	Eif6	TRUE	0.235313	1.17716	6.29057	0.0050325	0.105591	77.7231	86.6813	79.4675	70.7884	64.6613	71.6526
ENSMUSG00000028453	Fancg	TRUE	0.327871	1.25516	4.65634	0.0050525	0.10589	28.4978	27.3898	27.121	22.5836	21.2139	22.3307
ENSMUSG00000074736	Syndig1	TRUE	-0.973984	0.509098	1.37802	0.0050746	0.10605	1.34107	1.6325	1.99971	3.98041	3.59107	2.21328
ENSMUSG00000025465	Echs1	TRUE	0.219641	1.16444	6.39325	0.00507736	0.10605	87.7812	86.6813	86.7997	77.3037	74.4592	72.6243
ENSMUSG00000004231	Pax2	TRUE	1.69449	3.23664	0.638472	0.00506861	0.10605	7.67173	0.680209	1.12483	0.733233	1.24136	0.953688
ENSMUSG00000028798	Eif3i	TRUE	0.233048	1.17532	7.60025	0.00509249	0.106169	195.107	209.3	201.72	170.278	165.078	180.301
ENSMUSG00000077614	Gm25500	FALSE	0.71098	1.63692	0.842343	0.00509456	0.106169	2.46521	2.31271	1.93721	1.19412	1.6182	1.29558
ENSMUSG00000097079	AC164564.1	FALSE	-1.90681	0.266682	-1.06376	0.00514026	0.106693	0.256382	0.113368	0.187472	1.00558	0.687179	0.431859
ENSMUSG00000064052	Gm5089	TRUE	-1.41221	0.375736	-0.901036	0.00517805	0.106693	0.256382	0.181389	0.374945	0.984627	0.642845	0.557818
ENSMUSG00000000142	Axin2	TRUE	-0.440888	0.736681	6.50744	0.0051769	0.106693	73.8971	77.952	84.8833	134.601	79.5576	107.173
ENSMUSG00000022793	B4galt4	TRUE	-0.345334	0.787126	4.63992	0.00515469	0.106693	20.6683	22.2428	23.3507	28.4704	26.7557	28.9345
ENSMUSG00000036053	Fmnl2	TRUE	-0.190014	0.876598	7.06405	0.0051948	0.106693	127.954	124.796	132.501	141.367	156.522	141.668
ENSMUSG00000030084	Plxna1	TRUE	0.217413	1.16265	7.6298	0.0051613	0.106693	224.038	201.977	204.637	184.188	179.664	178.61
ENSMUSG00000079197	Psme2	TRUE	0.24824	1.18776	5.31321	0.00512926	0.106693	39.897	41.4928	42.1813	34.0849	34.1151	35.8083
ENSMUSG00000004127	Trmt10a	TRUE	0.30925	1.23906	5.02855	0.00519341	0.106693	37.4317	36.9807	34.245	26.124	30.1472	31.3997
ENSMUSG00000002265	Peg3	TRUE	0.311999	1.24143	8.54118	0.00513872	0.106693	461.349	391.551	408.794	331.694	354.673	329.994
ENSMUSG00000050240	Hic2	TRUE	0.390551	1.31089	4.91747	0.00518491	0.106693	35.5976	35.8017	33.3909	25.0556	23.7409	31.0938
ENSMUSG00000097971	RP23-81C12.1	FALSE	0.502811	1.41697	4.34445	0.00514837	0.106693	16.7634	24.5556	26.2045	18.7498	13.1894	15.6909
ENSMUSG00000027314	Dll4	TRUE	0.518392	1.43236	2.50237	0.00518118	0.106693	6.96175	6.41664	6.08244	4.46225	5.07626	4.06667
ENSMUSG00000067206	Lrrc66	TRUE	2.64252	6.24423	-3.18851	0.00516123	0.106693	0.276103	0.0680209	0.0624908	0.0209495	0	0.0359882
ENSMUSG00000079553	Kifc1	TRUE	0.194333	1.14419	6.3997	0.00520687	0.106822	90.1083	84.7314	86.9455	74.5593	75.1907	79.0302
ENSMUSG00000066809	Gm10180	FALSE	-0.679371	0.624438	0.505946	0.00524992	0.10703	1.00581	1.45111	1.04151	2.074	1.7512	1.76342
ENSMUSG00000028871	Rspo1	TRUE	-0.504315	0.704995	6.28484	0.00523689	0.10703	47.3517	66.0256	76.2804	113.211	70.1144	85.67
ENSMUSG00000044927	H1fx	TRUE	-0.425831	0.74441	4.83434	0.00524287	0.10703	21.753	26.3468	25.1838	39.9507	30.8787	27.621
ENSMUSG00000034432	Cops8	TRUE	0.200122	1.1488	6.67045	0.0052518	0.10703	107.582	109.718	102.61	90.6695	90.3973	97.3482
ENSMUSG00000089957	A830011K09Rik	FALSE	1.01107	2.01541	-0.050272	0.00523572	0.10703	1.97217	1.38309	0.729059	0.544687	0.665012	0.809735
ENSMUSG00000062132	Gm1082	FALSE	1.57511	2.97957	-2.22737	0.00524428	0.10703	0.216938	0.158716	0.291624	0.041899	0.0443341	0.125959
ENSMUSG00000020218	Wif1	TRUE	-1.1164	0.461243	1.52146	0.0052837	0.107459	1.65662	1.33774	2.49963	5.11168	4.03441	2.78909
ENSMUSG00000027188	Pamr1	TRUE	-1.08099	0.472706	-0.638291	0.00528448	0.107459	0.47332	0.340105	0.416605	1.46647	0.620678	0.539824
ENSMUSG00000041720	Pi4ka	TRUE	-0.203618	0.86837	6.71096	0.00530545	0.107767	103.539	93.03	91.5074	112.771	110.835	108.199
ENSMUSG00000090439	Gm17455	TRUE	-1.09231	0.469009	-1.11156	0.00531729	0.107888	0.216938	0.226736	0.374945	0.817031	0.37684	0.557818
ENSMUSG00000090008	Gm16111	FALSE	-1.27852	0.412218	-1.39131	0.00533573	0.108084	0.138052	0.181389	0.312454	0.754182	0.509843	0.287906
ENSMUSG00000001604	Tcea3	TRUE	-1.08122	0.472629	-0.85344	0.00534149	0.108084	0.216938	0.362778	0.458266	0.984627	0.487676	0.719765
ENSMUSG00000050157	Gm867	TRUE	-1.0059	0.497961	-0.820257	0.00535806	0.108084	0.315547	0.272084	0.437436	0.900829	0.598511	0.575812
ENSMUSG00000021908	Gm6768	TRUE	-1.00307	0.498936	-1.17877	0.0053623	0.108084	0.256382	0.181389	0.312454	0.607536	0.465508	0.449853
ENSMUSG00000031253	Srpx2	TRUE	-0.991064	0.503106	-0.735859	0.00535095	0.108084	0.315547	0.49882	0.437436	1.17317	0.687179	0.629794
ENSMUSG00000047497	Adamts12	TRUE	-0.913534	0.530883	2.76804	0.00535672	0.108084	5.24597	3.44639	6.16576	12.3393	9.42101	6.26195
ENSMUSG00000030423	Pop4	TRUE	0.217411	1.16265	6.46716	0.00537378	0.108084	88.8462	97.542	94.3611	75.3554	82.927	83.1508
ENSMUSG00000028540	Dph2	TRUE	0.316003	1.24488	4.7198	0.00537376	0.108084	27.8865	28.3647	28.3708	22.1227	22.1892	23.6443
ENSMUSG00000020843	Timm22	TRUE	0.267677	1.20387	5.37892	0.00541219	0.108739	42.0663	46.5943	44.5976	36.7035	36.6422	37.3198
ENSMUSG00000055541	Lair1	TRUE	-0.79713	0.575493	0.154279	0.00544348	0.108893	0.749424	0.74823	0.999853	1.46647	1.83987	1.06165
ENSMUSG00000026494	Kif26b	TRUE	-0.523074	0.695887	4.55926	0.00543143	0.108893	18.3017	18.1389	21.1427	36.1379	23.7409	22.8885
ENSMUSG00000015829	Tnr	TRUE	1.75893	3.38447	-1.87637	0.00543214	0.108893	0.256382	0.408126	0.541587	0.125697	0.177337	0.0539824
ENSMUSG00000018263	Tbx5	TRUE	3.25277	9.53191	-2.69802	0.00544276	0.108893	0.986084	0.0453473	0	0.0628485	0.0221671	0.0179941
ENSMUSG00000052951	C130021I20Rik	FALSE	-0.596335	0.661432	3.88274	0.00553146	0.110463	13.4699	10.906	13.1439	28.1352	14.2978	14.3233
ENSMUSG00000018841	Rad51d	TRUE	0.298505	1.22987	4.27933	0.00553719	0.110463	20.5303	20.9278	21.226	16.4873	16.9578	17.5083
ENSMUSG00000024851	Pitpnm1	TRUE	0.386614	1.30732	4.15508	0.00553991	0.110463	18.4989	21.4719	20.5386	12.025	16.6253	17.5982
ENSMUSG00000028622	Mrpl37	TRUE	0.203594	1.15156	6.26082	0.00555433	0.110631	79.4784	81.4211	79.28	68.0021	69.9371	70.6089
ENSMUSG00000047632	Fgfbp3	TRUE	-0.528342	0.693351	5.38575	0.00557464	0.110916	29.1881	39.044	37.432	49.9646	58.7649	43.6717
ENSMUSG00000037686	Aspg	TRUE	0.713598	1.63989	1.08529	0.00558193	0.110942	2.80048	2.72084	2.14552	1.59216	1.41869	1.65546
ENSMUSG00000021694	Ercc8	TRUE	0.297056	1.22863	4.82253	0.00560035	0.111069	30.3714	32.1059	30.683	23.4844	25.8468	26.4693
ENSMUSG00000034990	Otoa	TRUE	1.27323	2.41702	-1.74863	0.00559654	0.111069	0.35499	0.272084	0.312454	0.0837981	0.199504	0.107965
ENSMUSG00000019828	Grm1	TRUE	-2.06057	0.239721	-1.25992	0.00561501	0.11124	0.059165	0.0906946	0.229133	0.754182	0.620678	0.233924
ENSMUSG00000086443	4933421A08Rik	FALSE	-0.836955	0.559824	-0.415682	0.00562903	0.111247	0.433877	0.634862	0.583247	1.00558	1.21919	0.737759
ENSMUSG00000019539	Rcn3	TRUE	-0.297219	0.81382	5.57863	0.00563945	0.111247	42.8355	44.259	44.5768	62.4296	46.6617	52.6868
ENSMUSG00000032171	Pin1	TRUE	0.262737	1.19975	6.08403	0.00563833	0.111247	72.063	76.1608	68.5524	60.9631	55.9497	63.7172
ENSMUSG00000047675	Rps8	TRUE	0.317643	1.24629	9.84859	0.00562673	0.111247	961.037	1046.37	995.166	769.371	780.879	858.913
ENSMUSG00000060730	Gm10086	FALSE	-1.7134	0.304941	-1.55614	0.00566778	0.111686	0.0394434	0.204063	0.208303	0.837981	0.399007	0.251918
ENSMUSG00000020303	Stc2	TRUE	-0.505616	0.70436	3.20231	0.00569994	0.1122	6.66593	7.55032	8.10297	10.2862	13.0121	8.42125
ENSMUSG00000041014	Nrg3	TRUE	-0.811496	0.569791	0.151631	0.00575488	0.113161	0.82831	0.566841	0.979022	1.29887	1.48519	1.40354
ENSMUSG00000002949	Timm44	TRUE	0.216494	1.16191	6.18251	0.00578878	0.113586	79.5178	76.3422	76.9262	64.734	67.5431	68.0717
ENSMUSG00000064514	Gm22455	FALSE	0.979273	1.97147	-0.277158	0.00578384	0.113586	0.986084	1.26972	0.81238	0.398041	0.554177	0.593806
ENSMUSG00000046432	Ngfrap1	TRUE	-0.22083	0.858071	7.74461	0.00580046	0.113694	177.377	202.838	204.699	223.657	224.774	233.168
ENSMUSG00000035666	Gtf3c4	TRUE	0.198869	1.1478	7.50375	0.00581874	0.113931	194.653	196.331	191.243	164.265	169.955	173.013
ENSMUSG00000020627	Klhl29	TRUE	-0.393749	0.761149	4.36947	0.0058375	0.114169	18.2031	18.7738	17.9765	29.036	19.9947	23.1584
ENSMUSG00000050822	Slc29a4	TRUE	-0.325085	0.798251	4.6073	0.00584323	0.114169	21.1219	21.0411	20.9552	27.1506	27.9527	24.0042
ENSMUSG00000049100	Pcdh10	TRUE	-0.845099	0.556672	4.75913	0.00586727	0.114396	18.2426	16.4384	22.5175	37.1644	36.7973	28.8086
ENSMUSG00000040964	Arhgef10l	TRUE	0.222332	1.16662	5.80567	0.00586575	0.114396	57.9423	62.6926	56.8666	49.0847	52.4695	50.5815
ENSMUSG00000042659	Arrdc4	TRUE	0.362273	1.28545	4.73689	0.00587375	0.114402	30.1544	31.5844	29.5165	22.1017	22.8543	26.0015
ENSMUSG00000030402	Ppm1n	TRUE	2.32159	4.99883	-2.94888	0.0059187	0.115156	0.157773	0.24941	0.124982	0	0.0443341	0.0539824
ENSMUSG00000014313	Cox6c	TRUE	0.246389	1.18623	6.84516	0.00593306	0.115314	117.107	121.667	127.335	97.9809	106.912	103.736
ENSMUSG00000032010	Usp2	TRUE	0.432196	1.34929	3.08741	0.00595252	0.11557	10.2158	9.77234	8.54041	7.41613	6.53929	7.17965
ENSMUSG00000074212	Dnajb14	TRUE	-0.278872	0.824235	5.13148	0.00597992	0.11598	33.7241	31.3576	33.8283	41.2496	42.1618	36.654
ENSMUSG00000026043	Col3a1	TRUE	-0.486997	0.713509	9.26334	0.00603746	0.116728	467.167	484.014	605.327	926.765	643.155	611.584
ENSMUSG00000023170	Gps2	TRUE	-0.244653	0.844019	5.51559	0.00602978	0.116728	41.3366	42.4224	42.6604	49.1057	52.403	48.2962
ENSMUSG00000024423	Impact	TRUE	0.265745	1.20226	5.72431	0.00603633	0.116728	60.723	61.0601	55.2835	46.5917	47.7035	52.9387
ENSMUSG00000037646	Vps13b	TRUE	-0.25683	0.836925	5.62944	0.00604636	0.116778	46.8784	43.8282	45.6599	52.269	55.6615	55.026
ENSMUSG00000065851	Gm22352	FALSE	-1.54394	0.342947	-2.55829	0.0060629	0.116975	0.0986084	0.0453473	0.0624908	0.272344	0.133002	0.215929
ENSMUSG00000094955	Gm3699	FALSE	0.617111	1.5338	2.13211	0.00607694	0.117124	5.12764	5.35098	4.81179	3.14243	2.99255	3.81475
ENSMUSG00000085438	1700020I14Rik	FALSE	-0.236611	0.848737	8.2854	0.00610067	0.117459	291.664	285.212	296.748	334.061	367.441	327.871
ENSMUSG00000058297	Spock2	TRUE	0.523155	1.43709	3.60733	0.00612017	0.117711	19.2484	13.2641	11.0609	10.7052	8.99983	10.6165
ENSMUSG00000049482	Ctu2	TRUE	0.3051	1.2355	4.91905	0.00616735	0.118495	31.7322	33.6477	30.9121	26.6478	24.7606	26.5053
ENSMUSG00000025875	Tspan17	TRUE	0.518454	1.43242	2.14307	0.00619503	0.118903	5.50235	5.62306	4.58266	3.72901	3.6354	3.59882
ENSMUSG00000024064	Galnt14	TRUE	-0.897463	0.53683	1.77808	0.00622559	0.119343	2.11022	2.19934	2.9579	6.85049	3.79057	2.91505
ENSMUSG00000034227	Foxj1	TRUE	-0.68794	0.62074	3.73766	0.00623088	0.119343	8.06617	10.4072	13.1022	23.8824	11.7929	15.187
ENSMUSG00000071708	Sms	TRUE	0.306869	1.23702	7.22504	0.00626837	0.119937	170.987	175.993	155.102	122.387	135.507	147.948
ENSMUSG00000031112	2610018G03Rik	TRUE	-0.433251	0.740591	4.28506	0.00628944	0.120216	13.4699	18.9325	20.3512	26.0193	19.9725	25.1918
ENSMUSG00000085006	BC021767	FALSE	-1.0008	0.499724	-0.588265	0.00634749	0.12081	0.315547	0.272084	0.77072	1.08937	0.665012	0.971682
ENSMUSG00000097756	AC169129.1	FALSE	-0.668414	0.629198	1.01792	0.00633967	0.12081	1.49885	1.56448	1.49978	2.34635	2.70438	2.21328
ENSMUSG00000097023	RP23-207N5.1	FALSE	-0.476321	0.718808	7.00024	0.00635323	0.12081	85.316	101.034	116.15	148.7	145.571	126.571
ENSMUSG00000098184	RP23-428C21.5	FALSE	1.53453	2.89695	-2.2563	0.00634875	0.12081	0.216938	0.272084	0.291624	0.146647	0.0665012	0.0539824
ENSMUSG00000066477	Gm16551	FALSE	2.00638	4.01773	0.630957	0.00634151	0.12081	4.51626	2.154	2.08303	0.125697	1.44086	0.6118
ENSMUSG00000022559	Fbxl6	TRUE	0.282573	1.21636	5.11882	0.0063705	0.121013	36.564	39.0894	35.4323	30.0835	29.2827	31.9216
ENSMUSG00000091387	Gcnt4	TRUE	0.818117	1.7631	-0.228903	0.00639081	0.121274	1.1833	1.02031	0.958192	0.398041	0.687179	0.701771
ENSMUSG00000001119	Col6a1	TRUE	-0.756322	0.592003	3.61679	0.00639787	0.121284	9.03253	8.59331	10.7901	24.8461	10.751	12.4159
ENSMUSG00000097039	Pvt1	FALSE	0.580363	1.49523	1.70699	0.00642043	0.121586	3.45129	4.10393	4.2702	2.30445	2.74872	2.84307
ENSMUSG00000075254	Heg1	TRUE	-0.247219	0.842519	7.16056	0.00643633	0.121684	145.881	127.04	129.689	160.033	169.179	148.739
ENSMUSG00000028811	Yars	TRUE	0.208739	1.15568	6.75684	0.00643876	0.121684	110.047	114.797	114.108	91.9893	95.7839	105.446
ENSMUSG00000016344	Ppdpf	TRUE	0.208423	1.15542	6.33115	0.0064533	0.121834	78.2753	88.6993	84.1126	74.1822	70.0923	72.9841
ENSMUSG00000044312	Neurog3	TRUE	2.77514	6.84542	-3.27172	0.00646304	0.121893	0.374712	0.0453473	0.0416605	0.0209495	0.0443341	0
ENSMUSG00000094568	Gm1815	FALSE	-0.718924	0.60755	0.7688	0.00647875	0.122065	1.26219	1.11101	1.62476	2.57679	1.92854	2.08732
ENSMUSG00000018648	Dusp14	TRUE	-0.547635	0.68414	2.72658	0.00648568	0.122071	3.82601	6.25793	5.81164	8.04461	7.93581	7.23364
ENSMUSG00000037946	Fgd3	TRUE	0.566136	1.48055	3.05736	0.00650023	0.12222	10.768	8.66133	10.5193	5.76112	7.2708	7.19765
ENSMUSG00000036241	Ube2r2	TRUE	-0.188448	0.877549	7.49373	0.00650758	0.122234	173.294	167.74	166.767	190.138	197.509	191.044
ENSMUSG00000022321	Cdh10	TRUE	-0.631386	0.645556	1.99028	0.00654144	0.122661	3.51046	3.24233	3.45782	6.49435	5.20926	4.13865
ENSMUSG00000022054	Nefm	TRUE	0.456884	1.37257	4.40941	0.00654359	0.122661	31.4758	23.9887	21.1011	16.7596	22.3444	16.7165
ENSMUSG00000001948	Spa17	TRUE	-0.511128	0.701674	2.70109	0.00657502	0.122822	4.98958	5.69108	6.14493	7.70942	8.53432	7.73747
ENSMUSG00000016763	Scube1	TRUE	0.385907	1.30668	7.42911	0.00656675	0.122822	193.627	194.472	186.077	119.894	149.606	169.882
ENSMUSG00000045991	Onecut2	TRUE	0.896992	1.86218	3.66448	0.00657879	0.122822	23.1532	15.5314	17.7682	6.70384	13.9209	9.69883
ENSMUSG00000086341	Gm15932	FALSE	1.27788	2.42483	-2.20219	0.00655923	0.122822	0.276103	0.294757	0.229133	0.167596	0.110835	0.0539824
ENSMUSG00000031548	Sfrp1	TRUE	-0.399023	0.758372	9.05796	0.00661793	0.123428	402.579	463.495	475.367	560.567	671.995	536.297
ENSMUSG00000054966	Ifltd1	TRUE	-1.41922	0.373915	-1.14081	0.00666427	0.124167	0.23666	0.113368	0.208303	0.586586	0.576344	0.359882
ENSMUSG00000050549	5730508B09Rik	TRUE	-0.600404	0.659569	1.56519	0.00668892	0.1245	2.32716	2.40341	2.4788	3.98041	3.72407	3.23894
ENSMUSG00000044341	Gm5601	FALSE	-0.532904	0.691162	1.44403	0.00670846	0.124626	2.5441	2.44875	2.33299	3.51952	3.5024	3.58083
ENSMUSG00000026694	Mettl13	TRUE	0.273364	1.20862	5.31164	0.00670918	0.124626	42.2241	42.1503	40.4524	30.9005	35.6668	36.69
ENSMUSG00000073705	Apitd1	TRUE	0.306862	1.23701	4.59947	0.00673063	0.124899	26.1509	26.2334	25.6421	20.1534	19.7952	23.0865
ENSMUSG00000038550	Gm129	TRUE	-0.626846	0.647591	2.41804	0.00676537	0.125417	4.57543	3.76382	4.16605	6.5153	8.29048	4.55251
ENSMUSG00000045589	Frrs1l	TRUE	-0.442577	0.735819	3.76996	0.00678244	0.125608	12.7008	10.4979	11.5816	16.0054	17.2903	14.0174
ENSMUSG00000078566	Bnip3	TRUE	-0.438474	0.737915	5.42385	0.00679247	0.125667	35.6765	36.1418	32.766	47.8487	57.2575	36.672
ENSMUSG00000055053	Nfic	TRUE	-0.510691	0.701886	3.90121	0.00680905	0.125848	12.681	11.5862	14.6645	23.0026	15.5835	16.8965
ENSMUSG00000050304	Slc25a2	TRUE	1.02989	2.04186	-1.5728	0.00683018	0.126112	0.335269	0.589515	0.374945	0.188546	0.243838	0.197935
ENSMUSG00000028161	Ppp3ca	TRUE	-0.223178	0.856676	6.25919	0.00685794	0.126372	68.7695	69.5174	70.9062	79.273	85.4097	79.534
ENSMUSG00000037159	Wee2	TRUE	1.46923	2.76874	-2.48365	0.00685595	0.126372	0.177495	0.24941	0.208303	0.104748	0.0886683	0.0359882
ENSMUSG00000070692	Rps12-ps10	FALSE	-1.37405	0.385807	-2.16916	0.00692626	0.127018	0.059165	0.181389	0.145812	0.398041	0.354673	0.251918
ENSMUSG00000045083	Lingo2	TRUE	-0.974694	0.508848	0.255275	0.00691821	0.127018	0.887475	0.566841	0.854041	1.63406	1.70686	1.2236
ENSMUSG00000039041	Adrm1	TRUE	0.212742	1.15889	6.5089	0.00691959	0.127018	92.4947	96.0229	94.3819	77.9531	77.1636	88.9089
ENSMUSG00000022055	Nefl	TRUE	0.596511	1.51206	2.35889	0.00692115	0.127018	7.69145	6.32595	5.68666	3.64522	5.18709	4.21062
ENSMUSG00000028661	Epha8	TRUE	1.29973	2.46182	-0.0316857	0.00692738	0.127018	2.22855	0.884272	1.41646	0.586586	0.509843	0.737759
ENSMUSG00000069917	Hba-a2	TRUE	-0.641386	0.641097	5.26255	0.00697588	0.127654	23.9224	22.9004	38.286	55.7257	36.753	40.2888
ENSMUSG00000021549	Rasa1	TRUE	-0.185013	0.879641	6.89487	0.00697503	0.127654	114.524	114.207	114.796	126.849	136.593	127.128
ENSMUSG00000028176	Lrrc7	TRUE	-1.09194	0.469131	1.40625	0.0069924	0.127829	1.38052	1.60983	2.18718	4.21085	4.12308	2.71711
ENSMUSG00000078521	Aunip	TRUE	0.351942	1.27628	4.46336	0.00701323	0.128083	23.7055	27.027	23.9548	17.9118	18.9528	21.6109
ENSMUSG00000027230	Creb3l1	TRUE	-0.646709	0.638736	1.54694	0.00702894	0.128243	1.913	2.19934	2.66627	3.83376	3.7684	3.02301
ENSMUSG00000060678	Hist1h4c	TRUE	1.10759	2.15485	-1.57005	0.00705399	0.128573	0.276103	0.544167	0.416605	0.167596	0.199504	0.197935
ENSMUSG00000032243	Itga11	TRUE	-0.712595	0.610221	2.90759	0.00706255	0.128602	6.01511	4.42136	6.37406	11.6689	9.022	6.89175
ENSMUSG00000064080	Fbln2	TRUE	-0.422634	0.746061	5.08536	0.00707332	0.128672	22.3447	28.138	33.8075	46.0051	34.625	32.3534
ENSMUSG00000054160	Nkx2-4	TRUE	4.55526	23.5109	-2.30312	0.00709913	0.129014	1.61718	0	0.0208303	0.041899	0.0221671	0
ENSMUSG00000022514	Il1rap	TRUE	-0.534235	0.690525	2.6005	0.00712	0.129266	5.12764	5.28296	4.66598	8.94544	5.60827	7.26962
ENSMUSG00000064337	mt-Rnr1	FALSE	-0.316646	0.802934	6.92928	0.00713164	0.129274	87.1106	127.879	130.647	142.101	143.31	144.997
ENSMUSG00000020708	Psmc5	TRUE	0.220293	1.16497	7.53705	0.00714145	0.129274	197.946	197.805	187.681	162.631	164.923	173.229
ENSMUSG00000020485	Supt4a	TRUE	0.268572	1.20462	5.17557	0.00713854	0.129274	38.5362	39.4748	38.1402	32.1575	30.8566	33.3791
ENSMUSG00000033022	Cdo1	TRUE	-0.636782	0.643146	3.77262	0.00716232	0.129495	9.52557	10.0444	12.4148	21.5989	15.1401	13.0097
ENSMUSG00000062963	Ufc1	TRUE	0.216204	1.16167	5.82213	0.00716768	0.129495	60.9794	58.5887	58.0956	51.5777	49.0336	52.3089
ENSMUSG00000029171	Pgm1	TRUE	-0.293133	0.816128	5.00199	0.00718691	0.129589	29.5628	27.9566	28.9124	35.0695	37.6619	33.2171
ENSMUSG00000022842	Ece2	TRUE	0.289834	1.2225	4.67709	0.00718623	0.129589	27.9851	28.4554	28.6208	22.2065	22.8764	24.472
ENSMUSG00000029397	Rchy1	TRUE	0.254265	1.19273	5.48723	0.00722978	0.130108	44.0779	49.1791	48.6387	38.8404	40.4327	39.677
ENSMUSG00000048978	Nrsn1	TRUE	0.610379	1.52666	1.5329	0.00722275	0.130108	3.5499	3.42372	3.41616	2.05305	2.12804	2.60915
ENSMUSG00000025175	Fn3k	TRUE	-0.806458	0.571784	0.19196	0.00726815	0.130578	0.907197	0.702883	0.874871	2.0321	1.10835	1.2236
ENSMUSG00000043088	Il17re	TRUE	2.35301	5.10888	-2.93022	0.00727008	0.130578	0.23666	0.226736	0.0833211	0.0209495	0.0443341	0.0359882
ENSMUSG00000054034	Tceal5	TRUE	-0.579076	0.669392	1.91841	0.00727962	0.130623	2.70187	2.81153	3.54114	4.83934	3.96791	4.71446
ENSMUSG00000019936	Epyc	TRUE	-1.31737	0.401265	-0.66678	0.00729794	0.130698	0.394434	0.226736	0.374945	1.29887	0.465508	0.737759
ENSMUSG00000027966	Col11a1	TRUE	-0.222199	0.857258	6.60023	0.00729448	0.130698	91.7452	89.833	93.1529	120.774	100.195	99.5435
ENSMUSG00000006941	Eif1b	TRUE	-0.210628	0.864161	6.60715	0.0073486	0.131477	88.4123	91.4881	90.7366	104.873	107.377	100.947
ENSMUSG00000028799	Zfp362	TRUE	-0.193215	0.874654	6.89658	0.00736639	0.131632	115.747	109.604	111.629	131.458	127.35	126.499
ENSMUSG00000000171	Sdhd	TRUE	0.215476	1.16109	6.91269	0.00737532	0.131632	124.187	130.646	124.044	105.732	104.939	115.576
ENSMUSG00000017417	Plxdc1	TRUE	1.51022	2.84853	-1.76637	0.00737865	0.131632	0.552207	0.158716	0.374945	0.167596	0.0443341	0.161947
ENSMUSG00000026407	Cacna1s	TRUE	-1.8038	0.286419	-1.8787	0.00742803	0.131684	0.0986084	0.0226736	0.166642	0.586586	0.310339	0.143953
ENSMUSG00000040490	Lrfn2	TRUE	-0.78631	0.579825	1.51244	0.00742597	0.131684	1.43968	2.5848	2.14552	3.95946	3.08122	3.58083
ENSMUSG00000032470	Mras	TRUE	-0.419333	0.74777	4.41676	0.00742008	0.131684	18.6961	17.1186	18.4556	26.543	24.672	21.395
ENSMUSG00000074227	Spint2	TRUE	-0.396615	0.759639	3.26811	0.00742662	0.131684	7.47452	7.82241	8.99867	10.9985	10.6624	10.3286
ENSMUSG00000091747	D17H6S56E-5	TRUE	-0.193273	0.874619	6.79312	0.00742643	0.131684	97.1687	105.568	111.525	117.59	116.266	125.383
ENSMUSG00000052301	Doc2a	TRUE	0.606846	1.52293	2.49909	0.00739855	0.131684	7.59285	7.39161	5.56168	4.3156	3.45806	5.68614
ENSMUSG00000039529	Atp8b1	TRUE	1.08111	2.11566	-0.961564	0.00743145	0.131684	1.00581	0.49882	0.437436	0.272344	0.421174	0.233924
ENSMUSG00000049401	Ogfr	TRUE	0.193568	1.14359	7.13873	0.00745298	0.131938	148.839	152.888	142.354	127.708	122.916	137.619
ENSMUSG00000031691	Tnpo2	TRUE	0.189775	1.14059	7.39591	0.00746253	0.131981	177.515	173.113	181.994	153.141	161.642	152.23
ENSMUSG00000086687	4930547E08Rik	FALSE	-1.16642	0.445526	-1.64778	0.00748191	0.132071	0.138052	0.294757	0.145812	0.43994	0.576344	0.287906
ENSMUSG00000032078	Zfp259	TRUE	0.256808	1.19483	5.75101	0.00747636	0.132071	57.3506	57.7044	56.3875	45.3976	48.2799	49.7897
ENSMUSG00000019124	Scrn1	TRUE	-0.538878	0.688306	7.15097	0.00749478	0.132172	94.8613	115.409	127.898	152.575	197.509	141.236
ENSMUSG00000045312	Lhfpl2	TRUE	-0.299439	0.812568	5.52375	0.00753599	0.132772	40.4886	39.2707	46.1599	57.6531	48.4794	48.854
ENSMUSG00000031314	Taf1	TRUE	-0.18618	0.87893	7.42143	0.00754888	0.132872	170.553	156.675	157.393	177.38	190.836	183.216
ENSMUSG00000060550	H2-Q7	TRUE	0.495108	1.40943	3.7145	0.00760009	0.133646	14.0024	17.8215	15.956	9.42728	10.6845	13.7475
ENSMUSG00000021099	Six6	TRUE	2.85752	7.24767	0.697038	0.00760997	0.133692	11.0836	0.453473	0.520757	0.125697	0.775847	0.755753
ENSMUSG00000035242	Oaz1	TRUE	0.226419	1.16993	8.04741	0.00763227	0.133957	274.447	277.729	263.899	229.418	225.328	242.759
ENSMUSG00000047878	A4galt	TRUE	-1.09274	0.468869	-0.726452	0.00764795	0.134063	0.433877	0.362778	0.458266	1.29887	0.842349	0.557818
ENSMUSG00000081809	Gm15539	FALSE	-0.84672	0.556047	-0.761465	0.00766737	0.134063	0.394434	0.521494	0.354114	0.712283	0.931017	0.647788
ENSMUSG00000019370	Calm3	TRUE	-0.226668	0.854607	8.40986	0.00766205	0.134063	307.283	320.832	325.619	376.4	362.609	376.959
ENSMUSG00000030611	Mrps11	TRUE	0.291903	1.22425	4.63158	0.00766338	0.134063	26.427	27.5485	26.6419	22.3531	21.2582	22.2227
ENSMUSG00000020611	Gna13	TRUE	0.179815	1.13274	6.69732	0.0077038	0.134572	110.126	108.856	107.651	92.2826	97.779	98.2839
ENSMUSG00000051177	Plcb1	TRUE	-0.562187	0.677275	3.28804	0.00771756	0.134685	6.94203	7.84508	8.64456	11.3127	12.9677	10.3286
ENSMUSG00000056412	Gm12396	FALSE	-0.731193	0.602406	-0.353975	0.00777359	0.135182	0.690259	0.680209	0.562417	1.21507	0.953184	1.04366
ENSMUSG00000059409	Ppp2r5d	TRUE	-0.207082	0.866287	7.42351	0.00777532	0.135182	161.994	159.078	151.811	182.533	176.938	186.383
ENSMUSG00000037351	Actr1b	TRUE	0.191275	1.14177	6.83146	0.00776189	0.135182	121.308	120.306	118.337	102.464	104.806	107.965
ENSMUSG00000063972	Nr6a1	TRUE	0.595396	1.51089	3.93803	0.00776101	0.135182	20.2936	20.3383	16.1643	10.0767	11.416	16.0687
ENSMUSG00000029056	Pank4	TRUE	0.242745	1.18324	5.89784	0.00779173	0.135253	65.0026	62.0578	65.8861	54.2592	54.4202	54.3962
ENSMUSG00000030707	Coro1a	TRUE	0.309983	1.23969	4.29143	0.00779404	0.135253	19.3864	21.4039	22.1426	17.3881	16.0046	17.3463
ENSMUSG00000060780	Lrrtm1	TRUE	0.675202	1.59682	2.68452	0.00783253	0.135793	9.99889	6.75675	5.83247	4.4413	4.18958	5.5062
ENSMUSG00000042581	Thsd7b	TRUE	-0.790359	0.5782	0.701215	0.00785644	0.136049	0.986084	1.11101	1.31231	2.09495	2.43838	1.38555
ENSMUSG00000050608	Minos1	TRUE	0.242364	1.18293	5.94711	0.00786995	0.136049	64.1546	68.4291	66.7402	56.7103	57.2354	54.5582
ENSMUSG00000000740	Rpl13	TRUE	0.244977	1.18507	8.82023	0.00787493	0.136049	446.952	510.474	464.786	422.677	388.301	389.105
ENSMUSG00000028884	Rpa2	TRUE	0.24864	1.18809	7.13172	0.00787675	0.136049	143.317	156.357	147.395	116.919	122.517	136.791
ENSMUSG00000023088	Abcc1	TRUE	0.270503	1.20623	5.0325	0.00788812	0.136118	34.651	37.7516	34.4741	29.6017	30.5019	28.5027
ENSMUSG00000079435	Rpl36a	TRUE	0.257228	1.19518	8.14563	0.00791439	0.136444	286.576	313.576	307.642	247.246	245.744	266.511
ENSMUSG00000058317	Ube2e2	TRUE	-0.336187	0.792132	4.15532	0.00794484	0.136459	15.3237	16.8692	15.6435	20.4886	19.5292	20.3513
ENSMUSG00000058325	Dock1	TRUE	-0.20107	0.869905	6.37294	0.00793925	0.136459	79.1825	74.9817	77.5511	96.7868	87.2939	82.3591
ENSMUSG00000024507	Hsd17b4	TRUE	-0.173765	0.886526	6.76951	0.00793509	0.136459	105.491	104.412	99.7145	115.285	117.219	116.746
ENSMUSG00000026576	Atp1b1	TRUE	0.376931	1.29858	3.95231	0.00793486	0.136459	19.7611	16.8692	15.6019	12.0041	12.9012	15.295
ENSMUSG00000094281	Gm8034	FALSE	-0.730732	0.602598	0.063637	0.00796647	0.136703	0.986084	0.657536	0.833211	1.48742	1.48519	1.16962
ENSMUSG00000037685	Atp8a1	TRUE	-0.276955	0.825331	5.64509	0.00804113	0.137856	47.9434	41.9462	48.3887	56.5846	55.9719	55.026
ENSMUSG00000080006	Rps19-ps7	FALSE	-1.4436	0.367649	-1.98256	0.00805399	0.137949	0.138052	0.136042	0.124982	0.544687	0.421174	0.143953
ENSMUSG00000030302	Atp2b2	TRUE	-0.504997	0.704662	2.70434	0.0081282	0.138322	5.38402	5.23761	5.18674	7.39518	8.31265	6.74779
ENSMUSG00000021027	Ralgapa1	TRUE	-0.189558	0.876874	6.55361	0.00810266	0.138322	91.8636	84.7314	84.9666	96.682	100.705	100.929
ENSMUSG00000053137	Mapk11	TRUE	0.222555	1.1668	5.82512	0.00811866	0.138322	62.143	59.745	58.0748	47.723	55.0187	51.5172
ENSMUSG00000026154	1110058L19Rik	TRUE	0.482694	1.39735	2.83198	0.00810706	0.138322	7.51396	8.93342	8.66539	5.99156	5.60827	6.35192
ENSMUSG00000035279	Ssc5d	TRUE	0.513474	1.42748	2.53086	0.00809286	0.138322	5.99539	7.25557	7.56139	4.04326	5.23143	5.29027
ENSMUSG00000097014	AC124338.1	FALSE	1.79017	3.45856	-2.77442	0.00809313	0.138322	0.11833	0.294757	0.104151	0.0209495	0.0886683	0.0359882
ENSMUSG00000028023	Pitx2	TRUE	3.17901	9.05683	-0.306629	0.00812453	0.138322	5.56151	0.362778	0.541587	0.041899	0.0665012	0.593806
ENSMUSG00000014856	Tmem208	TRUE	0.327511	1.25485	4.57367	0.00816594	0.138836	23.6857	26.8229	27.3085	20.4258	20.039	21.521
ENSMUSG00000053965	Pde5a	TRUE	-0.238337	0.847722	5.71649	0.00821421	0.139404	47.5687	48.3629	52.3881	60.7117	57.5457	56.7175
ENSMUSG00000031636	Pdlim3	TRUE	1.43536	2.7045	-0.233434	0.00821445	0.139404	1.99189	0.816251	0.729059	0.607536	0.133002	0.557818
ENSMUSG00000002900	Lamb1	TRUE	-0.294788	0.815192	6.41023	0.0082589	0.14003	79.8728	67.8395	80.4048	111.095	89.8431	78.9762
ENSMUSG00000034868	Myl12b	TRUE	-0.1854	0.879405	6.86727	0.00828843	0.140401	111.625	109.582	107.672	127.96	122.008	124.015
ENSMUSG00000029335	Bmp3	TRUE	-0.99297	0.502442	-0.307902	0.00831535	0.140728	0.453599	0.340105	0.708229	1.44552	0.620678	0.935694
ENSMUSG00000028651	Ppie	TRUE	0.241779	1.18245	5.43553	0.00833587	0.140946	45.3401	48.7257	47.0556	38.3795	41.3194	39.641
ENSMUSG00000032419	Tbx18	TRUE	-0.581105	0.668452	4.99077	0.0083524	0.141097	25.4804	25.1677	26.5586	46.1099	37.7949	31.6157
ENSMUSG00000074754	Gm561	TRUE	0.523209	1.43715	2.54811	0.00836141	0.14112	5.69956	7.75439	6.79067	4.1061	4.47775	5.47021
ENSMUSG00000083863	Gm13341	FALSE	-1.0976	0.467294	-1.78208	0.00837031	0.141141	0.157773	0.136042	0.208303	0.377091	0.288172	0.413865
ENSMUSG00000033857	Engase	TRUE	0.381313	1.30253	3.25424	0.00838071	0.141187	10.4328	10.4299	10.6026	8.17031	7.73631	8.24131
ENSMUSG00000086040	Wipf3	TRUE	-0.589116	0.66475	2.13521	0.00841036	0.141558	2.76103	3.49174	4.20771	5.23738	6.14028	4.37257
ENSMUSG00000042002	Foxn4	TRUE	1.79805	3.47749	-0.79323	0.00843624	0.141864	1.65662	0.838925	0.354114	0.125697	0.177337	0.503835
ENSMUSG00000084817	Gm5526	FALSE	-0.726138	0.60452	0.279015	0.00845605	0.141952	0.749424	0.952293	0.937362	1.75976	1.46303	1.15162
ENSMUSG00000038807	Rap1gap2	TRUE	0.595538	1.51104	2.22507	0.0084628	0.141952	7.29702	4.69344	5.60334	4.2318	3.79057	3.63481
ENSMUSG00000036264	Fstl4	TRUE	1.44515	2.72291	-1.49507	0.0084657	0.141952	1.08469	0.204063	0.354114	0.167596	0.199504	0.233924
ENSMUSG00000065873	n-R5s183	FALSE	1.6462	3.13008	-2.5886	0.0084722	0.141952	0.276103	0.136042	0.166642	0.041899	0.0665012	0.0719765
ENSMUSG00000025967	Eef1b2	TRUE	0.290716	1.22325	9.17327	0.00849626	0.142226	601.393	655.767	618.076	472.851	491.422	568.668
ENSMUSG00000024146	Cript	TRUE	0.254658	1.19305	5.51238	0.00850577	0.142256	46.839	50.3355	48.6803	38.1072	40.9204	43.1859
ENSMUSG00000045092	S1pr1	TRUE	-0.382693	0.767004	5.48006	0.00851536	0.142288	33.0535	39.7696	41.0148	46.9269	54.0212	47.4685
ENSMUSG00000083179	Gm12693	FALSE	-0.766939	0.587663	-0.5901	0.00857344	0.142356	0.512764	0.476147	0.520757	0.733233	1.04185	0.809735
ENSMUSG00000093436	Gm20646	FALSE	-0.609618	0.65537	1.39907	0.00854657	0.142356	2.0905	2.35806	2.10386	3.35192	3.8349	2.82508
ENSMUSG00000020108	Ddit4	TRUE	-0.411271	0.75196	5.96058	0.00855548	0.142356	49.7972	55.8452	55.346	80.2785	80.9541	52.9027
ENSMUSG00000024533	Spire1	TRUE	-0.242674	0.845177	6.7261	0.00857092	0.142356	97.0306	96.431	97.2357	111.179	126.374	106.453
ENSMUSG00000022680	Pdxdc1	TRUE	-0.179272	0.883148	6.38586	0.00853157	0.142356	80.2278	79.5845	76.822	91.6541	88.2914	88.0092
ENSMUSG00000027367	Stard7	TRUE	0.200061	1.14875	7.29458	0.00854451	0.142356	163.907	168.148	158.31	135.501	141.027	150.287
ENSMUSG00000028385	Snx30	TRUE	0.30453	1.23502	5.03541	0.00855851	0.142356	42.8355	32.582	33.4742	29.455	29.2162	29.5283
ENSMUSG00000040972	Igsf21	TRUE	-0.819659	0.566576	1.91163	0.0085987	0.142543	2.18911	2.5848	3.3745	6.66195	3.96791	3.76077
ENSMUSG00000083268	Gm11511	FALSE	1.02927	2.04099	-1.39223	0.00860012	0.142543	0.512764	0.476147	0.291624	0.188546	0.177337	0.251918
ENSMUSG00000078974	Sec61g	TRUE	0.239279	1.1804	6.43901	0.00869212	0.143938	86.3612	93.8689	98.5063	75.6906	81.0428	79.39
ENSMUSG00000066632	Pgk1-rs7	TRUE	-1.24581	0.421672	-2.06974	0.00872168	0.144298	0.0788867	0.204063	0.166642	0.460889	0.37684	0.233924
ENSMUSG00000096173	Gm3150	TRUE	-1.28768	0.409609	-2.12222	0.00880518	0.14516	0.0394434	0.136042	0.166642	0.293293	0.332506	0.215929
ENSMUSG00000015342	Xk	TRUE	-0.528292	0.693375	3.46969	0.00878953	0.14516	8.20422	7.89043	10.6443	12.9049	13.0564	12.6139
ENSMUSG00000024472	Dcp2	TRUE	0.246156	1.18604	8.1643	0.00878527	0.14516	318.15	319.789	309.913	243.831	272.788	282.526
ENSMUSG00000020444	Guk1	TRUE	0.301651	1.23255	4.62982	0.008804	0.14516	25.2043	26.3921	24.4964	20.6353	19.4405	21.6289
ENSMUSG00000051335	Gfod1	TRUE	-0.457377	0.728309	2.53663	0.0088673	0.145405	4.31905	4.53473	5.02009	6.49435	6.40628	6.15399
ENSMUSG00000029313	Aff1	TRUE	-0.274712	0.826615	4.96689	0.00886496	0.145405	30.963	27.163	28.1625	35.8237	34.0265	34.5667
ENSMUSG00000028653	Trit1	TRUE	0.270552	1.20627	4.85224	0.00882835	0.145405	30.825	31.5617	29.9123	24.4481	26.534	25.5337
ENSMUSG00000092680	Snord55	FALSE	1.65074	3.13995	-2.94275	0.00885895	0.145405	0.177495	0.226736	0.124982	0.104748	0.0443341	0.0179941
ENSMUSG00000055415	Atp10b	TRUE	1.94487	3.85003	-2.42073	0.00883793	0.145405	0.0394434	0.317431	0.374945	0.0209495	0.110835	0.0539824
ENSMUSG00000092369	1700039E22Rik	FALSE	3.04258	8.23962	-3.51717	0.0088537	0.145405	0.335269	0	0.0416605	0.0209495	0	0.0179941
ENSMUSG00000025889	Snca	TRUE	-0.537796	0.688823	2.91961	0.00891	0.145846	6.19261	5.32831	6.01995	10.0977	7.75847	7.62951
ENSMUSG00000022992	Kansl2	TRUE	0.184019	1.13604	6.62478	0.00890802	0.145846	99.6536	107.156	106.568	87.548	92.5697	95.6747
ENSMUSG00000047759	Hs3st3a1	TRUE	-0.725962	0.604594	1.67608	0.00894751	0.146201	1.93272	2.4941	2.35382	2.97483	4.58858	3.65281
ENSMUSG00000031504	Rab20	TRUE	1.1316	2.19102	-1.76024	0.00894655	0.146201	0.335269	0.272084	0.499926	0.104748	0.177337	0.215929
ENSMUSG00000065818	Snord35a	FALSE	1.10193	2.14641	-1.58208	0.00897134	0.14646	0.35499	0.453473	0.458266	0.251394	0.133002	0.197935
ENSMUSG00000035342	Lzts2	TRUE	0.21198	1.15828	6.21389	0.00898899	0.146593	80.8589	82.0786	73.5308	67.8555	62.4225	73.7939
ENSMUSG00000055874	Foxi3	TRUE	3.56438	11.83	-3.0421	0.00899534	0.146593	0.749424	0	0.0208303	0.0209495	0	0.0359882
ENSMUSG00000039989	Cbx4	TRUE	-0.551809	0.682164	2.5894	0.00902683	0.146847	4.35849	5.0789	5.54085	8.12841	7.55897	6.27995
ENSMUSG00000097772	AC107744.1	FALSE	0.234112	1.17618	5.56322	0.00902576	0.146847	50.0339	51.9226	51.055	40.2859	45.11	44.6794
ENSMUSG00000055435	Maf	TRUE	-0.374112	0.77158	4.10448	0.00907529	0.147505	17.6706	14.0803	16.1851	25.4746	17.778	18.9118
ENSMUSG00000082193	Rpl5-ps1	FALSE	-1.41574	0.374816	-2.61785	0.0091419	0.148288	0.11833	0.0680209	0.104151	0.41899	0.199504	0.179941
ENSMUSG00000035011	Zbtb7a	TRUE	-0.370041	0.77376	4.34746	0.00914781	0.148288	16.4479	18.0709	19.1638	24.9718	22.9651	21.449
ENSMUSG00000021464	Ror2	TRUE	-0.297581	0.813616	5.43924	0.00914215	0.148288	37.2937	38.0237	40.1607	53.3375	46.0853	42.5381
ENSMUSG00000035049	Rrp12	TRUE	0.244286	1.18451	6.08228	0.00915555	0.148288	75.041	72.7144	66.886	56.9827	61.0481	63.1594
ENSMUSG00000008843	Cldn13	TRUE	-0.735776	0.600495	0.636023	0.009225	0.148371	1.10441	0.74823	1.31231	1.67596	1.55169	2.05133
ENSMUSG00000049336	Tenm2	TRUE	-0.718857	0.607579	3.0327	0.00918742	0.148371	8.40143	5.57772	6.49904	13.3029	11.6377	8.79912
ENSMUSG00000038168	Leprel1	TRUE	-0.437723	0.738299	2.87977	0.00918609	0.148371	6.52787	6.05386	6.16576	8.715	8.91116	7.79145
ENSMUSG00000053062	Jam2	TRUE	-0.203438	0.868478	6.48238	0.00921054	0.148371	87.5051	83.3937	80.3007	93.7491	96.9588	98.5358
ENSMUSG00000026930	Gpsm1	TRUE	0.181354	1.13395	6.68092	0.00922443	0.148371	114.169	102.281	105.464	96.3049	93.5672	94.0553
ENSMUSG00000040711	Sh3pxd2b	TRUE	0.214424	1.16024	7.05135	0.00919528	0.148371	161.461	135.588	130.127	124.126	120.013	124.069
ENSMUSG00000027663	Zmat3	TRUE	0.29697	1.22856	6.49382	0.0092193	0.148371	89.6745	100.081	103.193	73.0091	84.7447	80.6856
ENSMUSG00000035697	Hmha1	TRUE	0.376386	1.29809	4.05523	0.00920613	0.148371	20.0964	20.5423	19.2472	16.8225	12.3027	16.9685
ENSMUSG00000054452	Aes	TRUE	-0.216362	0.860733	7.23102	0.00927243	0.149004	136.651	137.788	146.687	174.824	154.926	159.518
ENSMUSG00000041729	Coro2b	TRUE	-0.439664	0.737306	5.37569	0.00929631	0.149258	35.499	30.8815	35.2865	50.8026	46.6174	40.5048
ENSMUSG00000031697	Orc6	TRUE	0.218256	1.16333	6.63428	0.00936206	0.150183	103.44	111.894	109.046	86.9405	91.6387	100.191
ENSMUSG00000038172	Ttc39b	TRUE	-0.459682	0.727147	3.16649	0.00939231	0.150331	6.86314	7.4823	8.66539	10.8099	11.4604	9.39293
ENSMUSG00000032458	Copb2	TRUE	-0.181969	0.881499	7.7637	0.00939571	0.150331	205.105	208.28	202.137	233.566	227.833	236.839
ENSMUSG00000097084	FOXL1	TRUE	1.80558	3.4957	-1.17408	0.00937984	0.150331	1.02553	0.204063	0.354114	0.251394	0.110835	0.0899706
ENSMUSG00000032446	Eomes	TRUE	-0.576123	0.670764	6.61328	0.0094079	0.150396	77.6048	77.2944	78.7592	125.362	122.163	100.839
ENSMUSG00000033826	Dnahc8	TRUE	-0.651256	0.636726	1.21047	0.00942434	0.150443	1.79467	1.58716	1.99971	3.49857	2.50488	2.46519
ENSMUSG00000025722	Wdr73	TRUE	0.225754	1.16939	5.67405	0.00943526	0.150443	55.1813	55.1196	52.7422	46.4451	44.6888	48.2602
ENSMUSG00000031510	1700128E19Rik	FALSE	1.42092	2.67755	-2.13553	0.00943519	0.150443	0.315547	0.272084	0.187472	0.125697	0.110835	0.0539824
ENSMUSG00000025469	Msx3	TRUE	-0.962076	0.513318	-1.16562	0.0095744	0.152398	0.197217	0.385452	0.374945	0.649435	0.75368	0.467847
ENSMUSG00000030880	Polr3e	TRUE	0.22479	1.16861	5.96341	0.00956645	0.152398	67.7242	68.0436	63.6989	54.3849	58.1886	58.103
ENSMUSG00000073616	Myeov2	TRUE	0.278564	1.21299	5.29563	0.00958273	0.152399	39.4434	43.7601	43.931	37.1016	33.3614	34.3328
ENSMUSG00000006456	Rbm14	TRUE	-0.177048	0.884511	6.46441	0.00962456	0.152933	84.0341	84.5047	82.6753	95.7393	94.4761	93.8033
ENSMUSG00000084973	Gm13848	FALSE	-1.56504	0.337968	-2.25486	0.00966536	0.153449	0.0394434	0.0453473	0.104151	0.209495	0.266005	0.107965
ENSMUSG00000045414	1190002N15Rik	TRUE	-0.231378	0.851821	5.60056	0.00969899	0.153851	45.7543	47.5013	47.6388	58.093	51.1173	56.1596
ENSMUSG00000081281	Gm6274	FALSE	0.675839	1.59753	1.20234	0.00973746	0.154328	2.28771	2.74351	3.18703	1.50836	1.77337	1.85339
ENSMUSG00000052419	2610001J05Rik	TRUE	0.245719	1.18568	5.44576	0.00974817	0.154365	48.0814	47.8641	44.8476	38.1281	39.7899	40.8107
ENSMUSG00000024976	Shoc2	TRUE	-0.186376	0.878811	6.75512	0.00977153	0.154603	98.7859	104.956	100.131	112.268	118.838	114.659
ENSMUSG00000085781	Gm15640	FALSE	-0.918645	0.529006	-1.11251	0.00980442	0.154878	0.23666	0.294757	0.374945	0.544687	0.576344	0.593806
ENSMUSG00000036961	Wnt8b	TRUE	-0.57711	0.670305	7.25098	0.00981406	0.154878	92.6919	134.183	142.604	227.072	135.263	188.848
ENSMUSG00000033658	Ddx19b	TRUE	0.194313	1.14418	6.06673	0.00980751	0.154878	71.8263	68.7465	70.9062	56.8151	65.8362	62.2057
ENSMUSG00000002343	Armc6	TRUE	0.287089	1.22018	4.20958	0.00983223	0.155032	19.7414	20.0435	19.268	16.1311	15.4726	16.7705
ENSMUSG00000034438	Gbp8	TRUE	1.3813	2.60503	-2.25005	0.00984557	0.15511	0.453599	0.24941	0.145812	0.104748	0.110835	0.107965
ENSMUSG00000030872	Gga2	TRUE	0.2683	1.20439	7.09631	0.00985903	0.155189	153.08	147.9	140.917	117.527	118.949	130.403
ENSMUSG00000019894	Slc6a15	TRUE	-0.394657	0.76067	4.13098	0.00991155	0.155835	14.7124	14.4885	15.7893	23.2959	18.9085	16.9685
ENSMUSG00000029632	Ndufa4	TRUE	0.206298	1.15372	7.05525	0.00991693	0.155835	132.372	143.116	144.791	125.152	115.047	124.033
ENSMUSG00000028551	Cdkn2c	TRUE	-0.490334	0.71186	3.1485	0.00993945	0.156056	7.90839	7.11952	6.97814	12.025	10.1525	8.76314
ENSMUSG00000042256	Ptchd4	TRUE	-0.579931	0.668996	1.35215	0.00995693	0.156065	2.03133	1.99528	1.91638	3.56142	2.59355	2.73511
ENSMUSG00000031508	Ankrd10	TRUE	0.211272	1.15771	7.30509	0.00994965	0.156065	160.357	170.052	162.955	135.376	144.529	146.22
ENSMUSG00000029711	Epo	TRUE	0.830539	1.77835	0.493295	0.0099682	0.156109	1.75523	2.19934	1.5831	0.754182	1.08619	1.25959
ENSMUSG00000045930	Clec14a	TRUE	-0.495133	0.709496	3.84334	0.0100118	0.156583	12.1091	12.6519	11.9982	20.4677	17.9997	13.3696
ENSMUSG00000034647	Ankrd12	TRUE	-0.332217	0.794315	4.55283	0.0100166	0.156583	22.2658	20.8598	21.3719	28.9313	26.9773	25.3177
ENSMUSG00000008393	Carhsp1	TRUE	0.188672	1.13971	7.14822	0.0100257	0.156583	151.66	151.369	148.291	135.208	124.889	135.856
ENSMUSG00000046719	Nxph3	TRUE	1.18541	2.27428	-0.591093	0.0100324	0.156583	1.40024	0.612188	0.895701	0.586586	0.199504	0.485841
ENSMUSG00000039552	Rsph4a	TRUE	-0.917914	0.529274	-0.524656	0.0100521	0.156626	0.256382	0.408126	0.458266	0.837981	0.576344	0.701771
ENSMUSG00000072825	Cep170b	TRUE	-0.291586	0.817003	5.50222	0.0100454	0.156626	36.2879	39.8829	43.2228	53.6098	45.9523	46.5688
ENSMUSG00000024743	Syt7	TRUE	-0.357262	0.780645	5.01846	0.0100711	0.156789	27.7484	27.5938	29.9956	39.5736	34.7358	35.0166
ENSMUSG00000026915	Strbp	TRUE	-0.177581	0.884184	7.49746	0.0101758	0.158286	168.778	172.75	173.37	183.35	203.073	195.92
ENSMUSG00000040113	Mettl11b	TRUE	-1.045	0.484645	-0.476132	0.0102346	0.158885	0.512764	0.49882	0.291624	1.52931	0.465508	0.701771
ENSMUSG00000024290	Rock1	TRUE	-0.201161	0.86985	6.39963	0.010234	0.158885	80.6814	80.6955	75.7597	88.6164	91.9712	92.0219
ENSMUSG00000089542	Gm25835	FALSE	0.824477	1.77089	0.0623641	0.0102401	0.158885	1.34107	1.11101	1.20816	0.733233	0.687179	0.647788
ENSMUSG00000025348	Itga7	TRUE	-0.961309	0.513591	0.318013	0.0102799	0.159368	0.749424	0.589515	0.916532	1.9483	1.44086	1.02566
ENSMUSG00000023904	Hcfc1r1	TRUE	-0.376132	0.770501	3.55254	0.010326	0.159868	9.28891	10.5659	11.9982	14.0571	13.6549	13.6215
ENSMUSG00000034109	Golim4	TRUE	-0.182725	0.881037	6.86053	0.0103295	0.159868	109.613	110.579	108.359	127.75	127.948	117.268
ENSMUSG00000026712	Mrc1	TRUE	-0.593701	0.662641	3.83037	0.0103427	0.159939	10.5905	12.7879	11.3733	26.1031	13.3002	13.0457
ENSMUSG00000048572	Tmem252	TRUE	-0.738973	0.599166	0.319014	0.0104148	0.160785	0.848032	0.99764	0.77072	1.57121	1.48519	1.31357
ENSMUSG00000027942	4933434E20Rik	TRUE	0.201739	1.15008	6.07853	0.0104084	0.160785	71.0375	72.669	71.8019	58.7005	62.7106	65.9304
ENSMUSG00000093904	Tomm20	TRUE	0.194943	1.14468	6.81477	0.0104474	0.161154	111.94	126.247	118.149	101.228	100.816	109.17
ENSMUSG00000077345	Snord70	FALSE	0.957851	1.94241	-1.14841	0.0104586	0.161192	0.433877	0.453473	0.458266	0.104748	0.354673	0.233924
ENSMUSG00000007594	Hapln4	TRUE	1.23378	2.35182	-2.07144	0.0105092	0.161836	0.197217	0.317431	0.354114	0.125697	0.110835	0.125959
ENSMUSG00000036144	Meox2	TRUE	-1.04742	0.483834	-1.94383	0.0105743	0.162646	0.138052	0.158716	0.187472	0.356142	0.266005	0.377876
ENSMUSG00000058546	Rpl23a	TRUE	-0.261793	0.834051	7.12508	0.0105794	0.162646	123.142	130.986	139.146	180.92	150.293	140.336
ENSMUSG00000026177	Slc11a1	TRUE	0.930186	1.90552	-0.00387781	0.0105942	0.162739	2.38632	0.99764	0.895701	0.85893	0.576344	0.809735
ENSMUSG00000019916	P4ha1	TRUE	-0.278061	0.824698	6.02559	0.01063	0.163152	58.2776	64.8466	60.2828	79.4406	76.8089	66.1644
ENSMUSG00000032477	Cdc25a	TRUE	0.238285	1.17959	7.00434	0.0106841	0.163711	135.192	146.857	134.064	111.053	114.027	127.614
ENSMUSG00000040272	Accs	TRUE	0.300236	1.23135	4.30339	0.0106827	0.163711	22.3644	20.7917	21.4135	18.2261	17.7558	16.4826
ENSMUSG00000052135	Foxo6	TRUE	-0.871659	0.546518	0.44754	0.0106958	0.163754	0.907197	0.725557	1.16649	2.22065	1.90637	1.02566
ENSMUSG00000025289	Prdx4	TRUE	0.205258	1.15289	6.41444	0.0107542	0.164375	85.1779	91.5108	91.2782	76.34	74.7695	81.2614
ENSMUSG00000022176	Rem2	TRUE	0.447613	1.36378	3.00823	0.0107475	0.164375	9.84112	9.90838	8.74871	6.97619	6.58362	7.32361
ENSMUSG00000036295	Lrrn3	TRUE	-0.743398	0.597331	3.94261	0.010789	0.164438	11.7936	9.99908	12.2274	20.6981	20.9479	15.331
ENSMUSG00000060044	Tmem26	TRUE	-0.497481	0.708343	2.99833	0.0107939	0.164438	5.73901	6.6207	6.66568	11.4175	7.66981	7.77346
ENSMUSG00000068617	Efcab1	TRUE	-0.39481	0.76059	2.99537	0.0107759	0.164438	6.56732	6.41664	7.56139	9.09209	8.46782	9.44691
ENSMUSG00000020032	Nuak1	TRUE	0.381612	1.3028	5.74182	0.0107816	0.164438	68.9667	58.498	52.5131	52.3109	39.6791	46.1549
ENSMUSG00000020469	Myl7	TRUE	1.18931	2.28044	-1.65459	0.0108078	0.164514	0.493042	0.340105	0.374945	0.146647	0.221671	0.161947
ENSMUSG00000069171	Nr2f1	TRUE	0.379997	1.30134	7.40565	0.010821	0.164578	237.055	193.429	156.706	159.97	124.601	166.626
ENSMUSG00000022365	Derl1	TRUE	0.207874	1.15499	6.03214	0.010853	0.16493	67.5467	71.5807	69.1981	58.3863	58.0777	63.8431
ENSMUSG00000038760	Trhr	TRUE	-1.74723	0.297873	-2.3571	0.0108624	0.164937	0.0197217	0.158716	0.0208303	0.356142	0.0886683	0.215929
ENSMUSG00000047044	D030056L22Rik	TRUE	-0.242603	0.845219	5.75583	0.0108723	0.164952	46.3459	52.6482	50.8883	58.3234	59.9398	59.0387
ENSMUSG00000032231	Anxa2	TRUE	-0.467519	0.723207	6.06695	0.0108991	0.165179	54.846	50.3355	63.1782	100.453	67.6982	64.6709
ENSMUSG00000097156	RP23-168E14.7	FALSE	-0.449909	0.732089	8.34797	0.0109052	0.165179	218.556	266.347	296.081	361.149	410.268	295.391
ENSMUSG00000032087	Dscaml1	TRUE	-1.55169	0.34111	1.88306	0.010982	0.165289	1.77495	1.06566	2.35382	6.85049	5.6526	2.7531
ENSMUSG00000042751	Nmnat2	TRUE	-0.649857	0.637343	3.2675	0.0109549	0.165289	8.53949	5.73643	8.74871	12.6954	13.4997	9.96874
ENSMUSG00000049092	Gpr137c	TRUE	-0.470806	0.721561	2.94761	0.0109888	0.165289	6.17288	6.32595	7.12395	8.98734	10.352	7.88142
ENSMUSG00000029249	Rest	TRUE	-0.187683	0.878015	6.32673	0.010993	0.165289	80.7997	77.4532	77.2803	93.0787	84.8777	90.2945
ENSMUSG00000018547	Pip4k2b	TRUE	-0.183111	0.880802	7.0703	0.0109855	0.165289	123.359	127.675	131.064	145.788	148.519	139.526
ENSMUSG00000037784	Dzip1l	TRUE	0.219272	1.16415	5.71431	0.0109751	0.165289	58.0015	56.0719	53.7837	48.2048	46.573	49.3939
ENSMUSG00000094483	Purb	TRUE	0.235536	1.17734	7.43705	0.0109744	0.165289	194.18	182.387	189.514	142.666	166.43	171.7
ENSMUSG00000022248	Rad1	TRUE	0.297136	1.2287	4.94608	0.0109536	0.165289	33.1916	34.8947	33.4326	24.9299	28.4847	29.1865
ENSMUSG00000027371	Fahd2a	TRUE	0.370749	1.29302	3.12037	0.0109431	0.165289	9.34807	8.68401	8.83203	7.16473	6.87179	6.74779
ENSMUSG00000052062	Pard3b	TRUE	-0.392443	0.761839	4.52698	0.0110167	0.165389	20.195	20.1569	20.9344	27.9886	27.0438	25.4257
ENSMUSG00000039405	Prss23	TRUE	0.692674	1.61628	2.78941	0.0110175	0.165389	10.2947	8.59331	6.51987	4.4413	4.56642	6.69381
ENSMUSG00000050896	Rtn4rl2	TRUE	-0.783092	0.58112	0.756512	0.0110573	0.165851	1.00581	1.26972	1.66642	2.17875	2.50488	2.10531
ENSMUSG00000041797	Abca9	TRUE	-0.394734	0.76063	3.86498	0.0111366	0.166863	13.9827	12.924	13.3105	22.1017	14.6081	16.1767
ENSMUSG00000025403	Shmt2	TRUE	-0.169932	0.888885	6.73251	0.0111519	0.166863	98.8253	99.764	97.9439	111.242	111.988	110.376
ENSMUSG00000060143	Gm10076	TRUE	0.30273	1.23348	6.64332	0.0111514	0.166863	107.7	112.915	108.547	81.2632	79.4246	106.093
ENSMUSG00000064339	mt-Rnr2	FALSE	-0.325326	0.798118	7.28676	0.0111789	0.167131	111.566	154.498	170.475	180.103	167.251	199.537
ENSMUSG00000039883	Lrrc17	TRUE	-1.11773	0.46082	2.01065	0.011211	0.167448	2.56382	2.154	2.83292	9.72057	3.67973	3.00502
ENSMUSG00000026527	Rgs7	TRUE	-0.878253	0.544026	1.02127	0.0112267	0.167448	1.22274	1.26972	1.89555	2.68154	3.05906	2.33924
ENSMUSG00000057036	Gm7536	TRUE	-0.488551	0.712741	2.31618	0.0112273	0.167448	4.22044	4.82949	4.31186	6.5153	6.38412	5.84809
ENSMUSG00000017737	Mmp9	TRUE	-1.13382	0.455709	-1.53989	0.0112533	0.1677	0.177495	0.113368	0.208303	0.460889	0.487676	0.179941
ENSMUSG00000073803	4930544L04Rik	TRUE	-1.23248	0.425585	-1.99521	0.0112821	0.167858	0.059165	0.0906946	0.208303	0.230445	0.332506	0.287906
ENSMUSG00000031074	Fgf3	TRUE	0.903377	1.87044	0.132794	0.0112771	0.167858	0.926919	1.2017	1.74974	0.293293	1.04185	0.737759
ENSMUSG00000033712	2610301G19Rik	TRUE	0.188011	1.13919	7.70957	0.0113191	0.168138	229.324	216.669	211.344	190.347	190.77	195.902
ENSMUSG00000032517	Mobp	TRUE	1.13736	2.19978	0.898024	0.0113165	0.168138	2.50465	2.26736	2.35382	0.230445	1.39653	1.60148
ENSMUSG00000059430	Actg2	TRUE	-1.48332	0.357666	-1.55376	0.0113302	0.168155	0.138052	0.0680209	0.312454	0.87988	0.288172	0.3059
ENSMUSG00000089844	A530032D15Rik	TRUE	-0.795132	0.576291	-0.419193	0.0113566	0.168155	0.59165	0.385452	0.687399	0.817031	1.35219	0.755753
ENSMUSG00000031667	Aktip	TRUE	-0.215893	0.861013	5.53083	0.0113525	0.168155	42.5791	43.284	43.806	53.0861	49.5434	47.9903
ENSMUSG00000068324	Gm10029	FALSE	0.847294	1.79912	-0.389551	0.0113389	0.168155	0.749424	0.974967	0.687399	0.356142	0.509843	0.467847
ENSMUSG00000075704	Txnrd2	TRUE	0.314516	1.24359	4.1686	0.0113701	0.168219	20.2936	18.547	17.4974	14.7694	14.6524	15.8708
ENSMUSG00000040407	Akap9	TRUE	-0.232771	0.850999	7.58204	0.0113803	0.168236	193.982	172.002	175.537	228.832	207.395	200.167
ENSMUSG00000001569	Nom1	TRUE	0.212315	1.15855	5.82056	0.0113918	0.168256	59.9539	62.6246	58.1581	48.7495	54.1542	53.0826
ENSMUSG00000080829	Gm8545	FALSE	1.43784	2.70915	-2.67146	0.0113999	0.168256	0.157773	0.158716	0.291624	0.041899	0.0443341	0.125959
ENSMUSG00000040675	Mthfd1l	TRUE	0.298873	1.23018	5.44563	0.0114147	0.16834	47.8842	44.8938	41.3272	33.1421	37.4624	38.3994
ENSMUSG00000024824	Rad9a	TRUE	0.271753	1.20727	5.3215	0.0114401	0.168579	41.9874	47.7507	45.1392	36.2217	37.3958	38.0756
ENSMUSG00000029866	Kel	TRUE	-0.624409	0.648685	3.94447	0.0114795	0.168622	10.6891	8.41192	15.7685	19.902	14.8963	18.9658
ENSMUSG00000038400	Pmepa1	TRUE	-0.327191	0.797087	3.87542	0.0114596	0.168622	12.2472	13.4228	14.1646	17.7023	17.0465	15.241
ENSMUSG00000026727	Rsu1	TRUE	-0.262087	0.833881	4.97165	0.0114636	0.168622	28.9317	28.7275	28.8707	37.3949	32.6743	33.703
ENSMUSG00000033487	Fndc3a	TRUE	-0.174778	0.885904	7.27398	0.0114731	0.168622	153.297	145.315	146.749	167.931	169.246	165.582
ENSMUSG00000014329	Bicc1	TRUE	-0.356384	0.78112	4.12281	0.0115329	0.169272	16.6057	15.146	15.0811	23.3168	19.4405	17.2384
ENSMUSG00000024170	Telo2	TRUE	0.267364	1.20361	5.5613	0.0116	0.170121	53.1105	48.9977	50.7425	41.5848	43.1371	42.2862
ENSMUSG00000028214	Gem	TRUE	-0.727053	0.604137	1.13108	0.0116478	0.170551	1.59746	1.6325	1.56227	2.87008	2.99255	2.08732
ENSMUSG00000001504	Irx2	TRUE	1.39727	2.63403	0.410772	0.0116451	0.170551	3.70768	1.2017	1.60393	0.900829	0.576344	0.989676
ENSMUSG00000070699	Sars2	TRUE	0.269326	1.20524	4.8336	0.0116782	0.17086	31.5547	29.3397	29.2457	24.6995	24.0956	25.9835
ENSMUSG00000040521	Tsfm	TRUE	0.284592	1.21807	5.04922	0.0116923	0.170932	32.028	39.3841	35.1823	28.6799	29.8369	28.9705
ENSMUSG00000022231	Sema5a	TRUE	-0.631435	0.645534	5.95838	0.0117425	0.171529	52.3413	37.0714	52.5131	81.8288	82.3063	55.7638
ENSMUSG00000083011	Gm12816	FALSE	-1.59613	0.330764	-2.96566	0.0117976	0.171655	0.059165	0.0906946	0.0208303	0.209495	0.133002	0.179941
ENSMUSG00000027797	Dclk1	TRUE	-0.418534	0.748185	6.515	0.0117752	0.171655	76.6976	70.311	83.3835	109.692	112.941	85.3461
ENSMUSG00000054920	Klhl5	TRUE	-0.408311	0.753505	5.94769	0.011774	0.171655	56.4237	49.7686	49.9301	73.0929	71.3336	62.7995
ENSMUSG00000000148	Brat1	TRUE	0.270022	1.20583	4.70614	0.011795	0.171655	29.0106	28.6595	26.7877	24.1967	22.6104	23.2304
ENSMUSG00000027378	Nphp1	TRUE	0.281038	1.21507	5.73602	0.011792	0.171655	63.8982	57.1603	54.3253	46.8222	46.3292	51.1753
ENSMUSG00000045752	Tssc4	TRUE	0.217258	1.16252	5.75969	0.0118071	0.171658	57.1534	56.5481	57.0958	50.614	45.9302	50.3475
ENSMUSG00000006270	Vax1	TRUE	0.768056	1.70297	3.46022	0.0118341	0.171916	17.8284	12.1984	13.2897	4.2737	12.8791	8.29529
ENSMUSG00000024493	Lars	TRUE	0.184211	1.1362	6.95214	0.0118532	0.172057	132.589	129.036	130.752	112.206	110.725	122.36
ENSMUSG00000093865	Lrit3	TRUE	1.4174	2.67103	-2.26441	0.0118695	0.172159	0.335269	0.181389	0.145812	0.0628485	0.155169	0.0359882
ENSMUSG00000027951	Adar	TRUE	0.174283	1.1284	6.49378	0.0119131	0.172656	96.1432	92.1684	93.2779	84.8036	83.4812	81.2974
ENSMUSG00000037376	Trmt6	TRUE	0.230615	1.17333	6.07847	0.011937	0.172866	70.15	77.2038	68.3649	56.7313	62.7106	64.365
ENSMUSG00000031748	Gnao1	TRUE	-0.535944	0.689707	6.60341	0.0119601	0.173065	76.1059	71.7848	83.0503	118.26	124.712	91.896
ENSMUSG00000066129	Kndc1	TRUE	0.866526	1.82327	-0.422267	0.012053	0.174273	0.769145	1.04299	1.18733	0.607536	0.354673	0.665782
ENSMUSG00000038369	Ncoa6	TRUE	-0.211387	0.863706	7.23299	0.012114	0.175018	149.845	131.394	138.917	156.2	174.677	155.667
ENSMUSG00000097921	AC153382.2	FALSE	-0.821946	0.565678	-0.512751	0.0121453	0.175059	0.552207	0.362778	0.541587	1.08937	0.731513	0.773747
ENSMUSG00000041075	Fzd7	TRUE	0.384033	1.30498	5.95756	0.0121413	0.175059	82.831	74.7097	59.1788	55.5791	49.4326	61.036
ENSMUSG00000025318	Jph3	TRUE	0.50716	1.42125	2.72061	0.0121337	0.175059	6.33066	9.81769	8.76954	5.59352	5.20926	6.69381
ENSMUSG00000030862	Cpxm2	TRUE	-1.21769	0.42997	0.741323	0.0121863	0.175195	0.631094	1.06566	1.29148	3.22623	2.23887	1.49351
ENSMUSG00000025938	Slco5a1	TRUE	-0.512876	0.700824	4.87209	0.0122022	0.175195	27.1173	20.2929	24.3089	38.2538	37.1742	26.9552
ENSMUSG00000034729	Mrps10	TRUE	0.227706	1.17097	5.17121	0.0121916	0.175195	40.3308	39.4068	38.2027	33.0374	34.093	33.595
ENSMUSG00000031431	Tsc22d3	TRUE	0.256948	1.19495	5.53266	0.0121932	0.175195	51.8483	51.4465	49.5344	41.501	41.6741	44.6974
ENSMUSG00000010592	Dazl	TRUE	1.60736	3.04694	-2.73225	0.0121827	0.175195	0.295825	0.181389	0.0833211	0.0628485	0.0221671	0.0899706
ENSMUSG00000079466	Prdm12	TRUE	-0.785804	0.580029	1.8745	0.0122236	0.175367	2.6427	2.35806	3.10371	4.58794	5.7191	3.68879
ENSMUSG00000026353	Ubxn4	TRUE	-0.163079	0.893117	6.80271	0.0122345	0.175386	106.931	108.584	105.839	119.035	120.057	120.705
ENSMUSG00000087885	Gm23600	FALSE	1.07606	2.10826	-1.49748	0.0122491	0.17546	0.552207	0.294757	0.666568	0.209495	0.155169	0.341888
ENSMUSG00000061904	Slc25a3	TRUE	0.224257	1.16818	8.45335	0.0123001	0.175918	354.911	376.836	356.343	303.642	311.802	315.977
ENSMUSG00000060636	Rpl35a	TRUE	0.236164	1.17786	8.31222	0.0122939	0.175918	327.676	350.58	356.052	281.205	273.187	323.66
ENSMUSG00000022799	Arhgap31	TRUE	-0.307079	0.808277	5.49217	0.0123282	0.176047	41.948	37.8196	43.9935	60.984	46.3957	45.777
ENSMUSG00000020526	Znhit3	TRUE	0.28732	1.22037	4.2455	0.0123276	0.176047	19.8992	20.9958	20.497	16.5711	15.9603	17.7422
ENSMUSG00000090137	Uba52	TRUE	0.44347	1.35987	2.50949	0.0123392	0.176068	5.95595	6.96081	6.37406	4.77649	4.96542	4.44455
ENSMUSG00000039109	F13a1	TRUE	-0.529739	0.69268	3.39919	0.0123525	0.176121	8.30283	9.65897	9.68607	17.9956	10.0195	11.8941
ENSMUSG00000021390	Ogn	TRUE	-1.25071	0.42024	2.23069	0.0123701	0.176236	3.53018	1.97261	2.91624	10.8728	5.12059	4.06667
ENSMUSG00000028613	Lrp8	TRUE	-0.262479	0.833654	6.78331	0.0123804	0.176246	102.277	99.2199	103.547	133.993	119.436	112.517
ENSMUSG00000050700	Emilin3	TRUE	0.526875	1.44081	2.27166	0.0124014	0.176409	7.08008	5.75911	4.81179	3.72901	3.81274	4.69646
ENSMUSG00000027276	Jag1	TRUE	0.264357	1.2011	5.94749	0.0124385	0.1768	75.7707	65.4361	61.8034	53.8821	55.1738	59.9564
ENSMUSG00000034848	Ttc21b	TRUE	-0.267119	0.830977	5.32443	0.0124644	0.177032	37.1556	38.7719	35.5781	43.1141	46.1518	44.9133
ENSMUSG00000059810	Rgs3	TRUE	-0.324278	0.798698	5.21624	0.0124776	0.177084	34.4735	30.9042	34.0367	42.5694	43.5805	38.3635
ENSMUSG00000040280	Ndufa4l2	TRUE	-0.969264	0.510766	-0.390634	0.0125251	0.177496	0.571929	0.385452	0.624908	1.13127	1.21919	0.773747
ENSMUSG00000037958	Ccdc55	TRUE	-0.250732	0.84047	5.46487	0.0125386	0.177496	39.8378	44.8711	41.6605	47.0317	54.8857	48.4402
ENSMUSG00000035754	Wdr18	TRUE	0.199707	1.14847	6.39528	0.0125338	0.177496	85.7696	92.1003	87.383	75.9839	75.3237	79.606
ENSMUSG00000046865	Fbl	TRUE	0.269573	1.20545	7.50164	0.0125451	0.177496	190.038	197.85	188.326	147.38	160.733	169.864
ENSMUSG00000020986	Sec23a	TRUE	-0.178628	0.883543	6.48834	0.0125688	0.177636	83.3832	83.1669	85.8207	98.6722	93.9884	92.9936
ENSMUSG00000032044	Rpusd4	TRUE	0.277317	1.21194	4.59462	0.0125773	0.177636	25.3818	26.6869	25.8087	20.8657	21.1474	22.2227
ENSMUSG00000096942	Rps19-ps6	FALSE	0.572987	1.4876	1.51113	0.0125839	0.177636	3.2738	3.15164	3.27035	2.05305	1.92854	2.51918
ENSMUSG00000080902	Gm11226	FALSE	0.87049	1.82828	-1.2834	0.0126196	0.178004	0.453599	0.544167	0.666568	0.251394	0.288172	0.359882
ENSMUSG00000050587	Lrrc4c	TRUE	-0.537173	0.68912	3.52993	0.0126375	0.178121	7.31674	9.72699	10.9359	13.7848	14.3643	12.4519
ENSMUSG00000037805	Rpl10a	TRUE	0.237879	1.17926	8.87001	0.0126529	0.178203	469.336	513.581	491.761	413.502	397.256	439.704
ENSMUSG00000024667	Tmem216	TRUE	0.289618	1.22232	4.37336	0.0126698	0.178304	21.0233	22.6283	22.705	19.3783	17.0465	17.8502
ENSMUSG00000030103	Bhlhe40	TRUE	-0.54577	0.685026	2.73886	0.0127186	0.178488	5.1868	5.39633	6.06161	8.56835	9.95301	5.8121
ENSMUSG00000021057	Akap5	TRUE	-0.365598	0.776147	3.87475	0.0126945	0.178488	13.0952	13.4681	13.4564	15.0836	19.906	16.5906
ENSMUSG00000021338	Lrrc16a	TRUE	-0.320983	0.800524	4.34792	0.0127065	0.178488	17.7692	17.9122	18.7264	24.2805	23.3641	20.3513
ENSMUSG00000020307	Cdc34	TRUE	0.21195	1.15825	6.91626	0.0127215	0.178488	121.919	132.346	126.315	103.972	104.429	120.093
ENSMUSG00000055737	Ghr	TRUE	-0.370445	0.773544	3.28464	0.0127459	0.178694	8.20422	8.04914	8.99867	12.3602	10.6845	9.62685
ENSMUSG00000041757	Plekha6	TRUE	0.317428	1.24611	6.02319	0.0128103	0.17946	83.9355	67.5448	64.7405	59.2243	48.7454	65.5166
ENSMUSG00000060257	Scrt2	TRUE	-0.930386	0.524718	4.71991	0.0128478	0.179739	19.1103	16.1663	18.3306	38.2538	40.1446	23.7882
ENSMUSG00000016940	Kctd2	TRUE	0.226156	1.16971	5.28017	0.0128496	0.179739	40.035	41.9462	40.9731	33.7078	36.4427	34.9626
ENSMUSG00000035032	Nek11	TRUE	-1.04238	0.485527	-1.27913	0.0128771	0.179766	0.157773	0.385452	0.208303	0.754182	0.487676	0.3059
ENSMUSG00000024206	Rfx2	TRUE	-0.34158	0.789177	4.33612	0.0128757	0.179766	17.572	16.5064	17.6224	24.6995	19.241	21.5749
ENSMUSG00000029101	Rgs12	TRUE	0.227571	1.17086	6.97744	0.0128808	0.179766	152.882	126.746	121.336	121.256	105.67	115.54
ENSMUSG00000024921	Smarca2	TRUE	-0.238414	0.847677	5.39557	0.0128988	0.179844	39.8575	37.8877	41.1814	49.2523	43.3366	47.7024
ENSMUSG00000018567	Gabarap	TRUE	-0.204491	0.867845	7.13552	0.0129058	0.179844	130.676	130.714	136.126	163.595	143.931	150.521
ENSMUSG00000029394	Cdk2ap1	TRUE	0.17905	1.13214	6.94701	0.0129591	0.180178	123.951	131.008	129.502	106.926	115.734	116.89
ENSMUSG00000063235	Ptpmt1	FALSE	0.396975	1.31674	3.22641	0.012951	0.180178	10.3144	10.4072	9.95687	7.33233	8.48999	7.48555
ENSMUSG00000097881	AC117547.1	FALSE	2.27213	4.83036	-3.08112	0.012946	0.180178	0.256382	0.113368	0.0416605	0.041899	0	0.0359882
ENSMUSG00000021903	Galnt15	TRUE	-1.09248	0.468955	-1.83424	0.0129945	0.180263	0.177495	0.158716	0.104151	0.356142	0.266005	0.323894
ENSMUSG00000025323	Sp4	TRUE	-0.228499	0.853522	5.91098	0.0129902	0.180263	54.4713	55.6865	57.7415	61.3192	70.7795	64.6349
ENSMUSG00000021779	Thrb	TRUE	1.09238	2.13225	-0.514343	0.0129775	0.180263	1.97217	0.612188	0.479096	0.41899	0.554177	0.467847
ENSMUSG00000028640	Tfap2c	TRUE	-0.314576	0.804087	6.18471	0.0130511	0.180913	53.2288	70.7644	62.5325	82.9182	72.442	76.565
ENSMUSG00000043099	Hic1	TRUE	-1.12521	0.458434	1.25038	0.0130872	0.181277	1.24247	1.22438	1.95804	4.69269	3.32506	1.65546
ENSMUSG00000080406	Mir1188	FALSE	1.34454	2.53949	-2.49951	0.0131028	0.181356	0.414155	0.226736	0.187472	0.0837981	0.133002	0.107965
ENSMUSG00000036450	Hif1an	TRUE	0.184218	1.1362	7.31065	0.0131354	0.181672	173.354	169.032	163.997	142.959	147.056	155.631
ENSMUSG00000095472	Snord88a	FALSE	0.991866	1.98876	-1.76457	0.0131614	0.181896	0.315547	0.362778	0.333284	0.167596	0.133002	0.197935
ENSMUSG00000034203	Chchd4	TRUE	0.348017	1.27281	5.01449	0.0132153	0.182503	32.9549	40.4725	33.3493	26.0821	28.9945	28.7906
ENSMUSG00000044288	Cnr1	TRUE	-0.867653	0.548038	3.95583	0.0132723	0.183016	11.8133	8.57064	12.4773	24.5738	22.5882	12.8298
ENSMUSG00000021938	Pspc1	TRUE	0.18521	1.13698	6.96474	0.0132644	0.183016	131.327	133.57	126.586	104.412	120.345	119.535
ENSMUSG00000005469	Prkaca	TRUE	-0.168611	0.889699	7.17411	0.0133268	0.183631	137.006	138.309	131.606	154	147.212	156.117
ENSMUSG00000023104	Rfc2	TRUE	0.184988	1.13681	7.00417	0.0133475	0.183779	132.727	136.699	131.356	116.291	113.939	122.27
ENSMUSG00000097769	AC121821.1	FALSE	0.374131	1.29606	4.43958	0.0133641	0.18387	22.9758	26.3241	23.2674	16.0683	19.7287	20.1714
ENSMUSG00000053007	Creb5	TRUE	-0.629584	0.646363	3.54514	0.0134042	0.184149	8.1845	7.68636	11.165	13.0515	16.3815	12.4159
ENSMUSG00000001524	Gtf2h4	TRUE	0.251079	1.1901	5.0592	0.0133994	0.184149	35.499	36.1418	36.6613	29.8112	29.8812	31.2918
ENSMUSG00000031647	Mfap3l	TRUE	-0.490957	0.711553	2.57518	0.0134322	0.184337	5.75873	4.87483	4.47851	7.43708	7.93581	5.90207
ENSMUSG00000028857	Tmem222	TRUE	0.221936	1.1663	5.32681	0.0134479	0.184337	41.7705	43.2613	41.4314	36.8502	35.0683	36.4921
ENSMUSG00000019278	Dpep1	TRUE	1.01241	2.01728	1.61455	0.0134402	0.184337	5.26569	3.67313	3.56198	2.22065	0.953184	3.00502
ENSMUSG00000024002	Brd4	TRUE	-0.182586	0.881122	7.53631	0.0135004	0.184919	179.625	173.725	172.329	190.494	209.434	196.712
ENSMUSG00000034154	Ino80	TRUE	0.181926	1.1344	6.08067	0.0135115	0.184934	75.2776	70.6284	70.323	61.2564	67.0554	62.3496
ENSMUSG00000002831	Plin4	TRUE	0.920706	1.89304	-1.28487	0.013529	0.185037	0.532485	0.544167	0.416605	0.251394	0.221671	0.3059
ENSMUSG00000027170	Eif3m	TRUE	0.212819	1.15895	7.34055	0.0135692	0.18545	172.052	177.195	165.413	142.122	140.672	161.209
ENSMUSG00000038199	4931409K22Rik	TRUE	-1.08362	0.471843	-1.8613	0.013612	0.185453	0.177495	0.136042	0.187472	0.377091	0.37684	0.323894
ENSMUSG00000028111	Ctsk	TRUE	-0.664329	0.630982	1.06724	0.0136362	0.185453	1.71579	1.2924	1.43729	2.87008	2.23887	1.96136
ENSMUSG00000063632	Sox11	TRUE	-0.325062	0.798264	6.77553	0.0136061	0.185453	101.724	100.943	102.235	138.141	134.111	109.746
ENSMUSG00000022091	Sorbs3	TRUE	-0.290056	0.81787	4.94444	0.0136398	0.185453	26.0721	27.027	29.7873	36.2636	30.9674	34.0989
ENSMUSG00000026814	Eng	TRUE	-0.28719	0.819497	4.85648	0.0135945	0.185453	25.6579	26.6415	28.35	36.8083	31.2999	30.3201
ENSMUSG00000051627	Hist1h1e	TRUE	0.929333	1.90439	-0.722326	0.013629	0.185453	0.394434	0.929619	0.916532	0.377091	0.354673	0.431859
ENSMUSG00000096980	AC113955.1	FALSE	1.12964	2.18804	-1.53406	0.0135971	0.185453	0.394434	0.317431	0.520757	0.146647	0.155169	0.251918
ENSMUSG00000035385	Ccl2	TRUE	-2.03714	0.243647	-3.14589	0.013729	0.186392	0.0394434	0.0226736	0.0208303	0.230445	0.0665012	0.0719765
ENSMUSG00000096807	Hist1h2bm	TRUE	1.24971	2.37793	-1.90776	0.0137219	0.186392	0.197217	0.408126	0.374945	0.188546	0.110835	0.107965
ENSMUSG00000041164	Zmiz2	TRUE	-0.228468	0.853541	7.32756	0.0137978	0.187118	147.676	140.758	148.395	173.965	175.63	162.235
ENSMUSG00000060950	Trmt61a	TRUE	0.304674	1.23514	4.99904	0.0138028	0.187118	35.1637	34.7133	32.9118	26.2707	28.2408	28.7006
ENSMUSG00000031832	Taf1c	TRUE	0.290267	1.22287	4.28927	0.0138162	0.187163	21.5361	18.9552	20.7469	17.4509	15.2731	17.3463
ENSMUSG00000060402	Chst8	TRUE	-0.789797	0.578426	2.10537	0.013832	0.187239	3.05686	2.81153	3.70779	8.19126	4.47775	3.90472
ENSMUSG00000022770	Dlg1	TRUE	-0.176977	0.884555	7.26606	0.0138656	0.187419	141.01	144.612	155.81	168.916	166.32	163.818
ENSMUSG00000006715	Gmnn	TRUE	0.211108	1.15758	6.31844	0.0138628	0.187419	78.6895	88.2005	83.7793	67.7717	72.9297	75.7912
ENSMUSG00000001506	Col1a1	TRUE	-0.658238	0.633652	7.03977	0.0139129	0.187921	98.6478	92.0777	121.503	241.674	125.111	125.977
ENSMUSG00000050702	Rfpl3s	TRUE	-0.871173	0.546702	-1.21609	0.013984	0.188428	0.35499	0.340105	0.229133	0.649435	0.487676	0.557818
ENSMUSG00000028572	Hook1	TRUE	-0.179836	0.882803	6.88415	0.0139756	0.188428	104.781	116.724	115.629	117.799	131.429	132.599
ENSMUSG00000020321	Mdh1	TRUE	0.198116	1.1472	7.87442	0.0139735	0.188428	239.263	254.013	246.401	209.286	208.082	227.338
ENSMUSG00000028952	Zbtb48	TRUE	0.288959	1.22176	4.40079	0.0139913	0.188428	22.5024	22.5149	22.83	18.6451	18.443	18.444
ENSMUSG00000032381	Fam96a	TRUE	0.218637	1.16363	6.31932	0.0140583	0.189007	81.7463	87.3162	84.1959	70.3904	70.4026	76.7989
ENSMUSG00000027628	Aar2	TRUE	0.22722	1.17058	5.59328	0.014065	0.189007	50.4875	51.5145	49.0761	41.6686	42.8711	44.4995
ENSMUSG00000022580	Rhpn1	TRUE	0.394353	1.31435	4.56203	0.0140459	0.189007	27.492	26.8002	22.33	18.8336	19.374	20.0814
ENSMUSG00000021318	Gli3	TRUE	-0.23731	0.848326	8.57953	0.0140984	0.189201	328.82	346.249	355.76	384.696	431.859	398.588
ENSMUSG00000028982	Slc25a33	TRUE	0.619318	1.53615	1.89051	0.0140999	0.189201	5.00931	4.26264	3.56198	2.57679	2.63788	3.13098
ENSMUSG00000050199	Lgr4	TRUE	0.318608	1.24713	5.10235	0.014138	0.189574	40.8239	36.0738	39.1609	26.3964	34.5585	32.1195
ENSMUSG00000031245	Hmgn5	TRUE	-0.213188	0.862629	6.62579	0.0141978	0.190238	91.1733	97.4513	94.7985	94.6499	113.606	120.237
ENSMUSG00000057335	Cep170	TRUE	-0.2505	0.840605	7.48681	0.0142224	0.19043	174.616	164.089	164.351	200.99	217.636	179.887
ENSMUSG00000026816	Gtf3c5	TRUE	0.196945	1.14627	6.10662	0.0142618	0.190542	75.4157	71.8528	69.0732	62.8904	62.4003	63.4473
ENSMUSG00000074221	Zfp568	TRUE	0.327369	1.25472	6.40671	0.0142559	0.190542	102.415	95.5921	89.9867	74.8736	71.4445	83.1868
ENSMUSG00000030108	Slc6a13	TRUE	0.823492	1.76968	-0.327488	0.0142459	0.190542	1.22274	0.702883	0.79155	0.398041	0.443341	0.683776
ENSMUSG00000048307	Ankrd46	TRUE	0.172243	1.12681	6.28796	0.0143125	0.191081	80.7208	84.6407	81.2589	73.6585	71.6883	73.488
ENSMUSG00000033970	Rfc3	TRUE	0.200485	1.14908	6.52379	0.0143602	0.191343	95.2163	99.6507	93.9862	76.361	82.4615	92.4718
ENSMUSG00000028680	Plk3	TRUE	0.371514	1.29371	3.97951	0.0143627	0.191343	19.3864	16.4611	16.2476	11.4384	16.049	12.8118
ENSMUSG00000098020	RP23-263M10.13	FALSE	0.831146	1.7791	-0.482564	0.0143632	0.191343	0.670537	0.816251	1.08317	0.356142	0.620678	0.467847
ENSMUSG00000026656	Fcgr2b	TRUE	-2.34022	0.19748	-3.0666	0.014379	0.19141	0.0197217	0.0226736	0	0.125697	0.0443341	0.0719765
ENSMUSG00000045573	Penk	TRUE	-0.818373	0.567081	0.0448774	0.0143926	0.19141	0.70998	0.634862	0.937362	1.25697	1.72903	1.06165
ENSMUSG00000035351	Nup37	TRUE	0.22758	1.17087	5.52618	0.0143993	0.19141	48.9098	50.6756	47.0556	39.4689	41.7406	43.9956
ENSMUSG00000049502	Dtx3l	TRUE	-0.389179	0.763564	3.85743	0.0144446	0.191614	10.5708	13.5135	14.8103	15.4607	19.5735	15.9068
ENSMUSG00000037138	Aff3	TRUE	-0.348637	0.785326	5.36941	0.0144578	0.191614	37.5106	33.8291	37.1195	51.5358	47.1937	39.4251
ENSMUSG00000051910	Sox6	TRUE	-0.269205	0.829777	6.9878	0.0144436	0.191614	105.965	115.93	118.691	128.672	148.453	133.336
ENSMUSG00000020253	Ppm1m	TRUE	0.275763	1.21063	5.04166	0.0144665	0.191614	37.5698	37.0941	33.5367	29.2246	27.5758	32.5334
ENSMUSG00000028859	Csf3r	TRUE	0.759331	1.69271	0.0596935	0.0144578	0.191614	1.49885	1.24705	1.27065	0.670384	0.487676	1.18761
ENSMUSG00000085829	Gm4285	FALSE	-0.584361	0.666945	1.04481	0.0144907	0.191786	1.61718	1.47379	1.70808	2.49299	2.26104	2.4472
ENSMUSG00000000561	Wdr77	TRUE	0.247681	1.1873	7.23897	0.0145003	0.191786	163.808	167.513	152.457	125.257	138.566	143.611
ENSMUSG00000015804	Med28	TRUE	0.188104	1.13927	5.93268	0.0145308	0.192052	60.1708	66.3431	64.1156	54.9506	55.0852	57.2393
ENSMUSG00000029142	Mrpl33	TRUE	0.310585	1.24021	5.20157	0.0145449	0.192101	37.4909	42.1503	39.7858	30.9424	33.4058	31.9396
ENSMUSG00000033713	Foxn3	TRUE	-0.38358	0.766533	4.72587	0.0145604	0.192169	25.3818	21.5173	23.8923	32.6603	31.6767	28.0528
ENSMUSG00000061360	Phf5a	TRUE	0.234622	1.1766	6.74639	0.0146609	0.193357	112.532	118.674	108.963	94.0214	94.0327	101.019
ENSMUSG00000041577	Prelp	TRUE	-0.680543	0.623931	0.0822129	0.0147315	0.194149	0.887475	0.838925	0.687399	1.55026	1.33002	1.00767
ENSMUSG00000025036	Sfxn2	TRUE	0.353018	1.27723	4.49527	0.014748	0.194228	28.3006	25.6666	22.83	19.6716	19.5957	20.8552
ENSMUSG00000077212	Snord69	FALSE	0.654127	1.57366	0.194878	0.0148099	0.194904	1.55801	1.36042	1.22899	0.775132	1.01969	0.845724
ENSMUSG00000028730	Wdr65	TRUE	-0.637652	0.642758	0.506623	0.0148761	0.195636	0.867754	1.17903	1.47895	2.09495	1.64036	1.74543
ENSMUSG00000033983	Coil	TRUE	0.224219	1.16814	5.74754	0.0149032	0.195836	58.1789	59.3596	57.9081	47.8068	50.0311	52.3269
ENSMUSG00000002984	Tomm40	TRUE	0.22568	1.16933	6.19893	0.0149126	0.195836	74.4888	79.9926	74.4474	64.1265	61.8461	69.7452
ENSMUSG00000090559	Gm17137	FALSE	-1.233	0.425432	-2.28887	0.0149718	0.196188	0.0394434	0.136042	0.124982	0.251394	0.177337	0.269912
ENSMUSG00000069919	Hba-a1	TRUE	-0.533094	0.691071	7.64721	0.014953	0.196188	132.707	123.095	198.721	246.052	172.349	239.304
ENSMUSG00000047238	Mageh1	TRUE	0.247098	1.18682	5.75555	0.0149818	0.196188	55.0826	59.1782	59.9495	45.0205	51.6049	50.1496
ENSMUSG00000061787	Rps17	TRUE	0.261096	1.19839	9.34601	0.0149708	0.196188	668.525	725.398	725.101	561.719	579.359	627.113
ENSMUSG00000081643	Gm11605	FALSE	-0.783282	0.581043	-0.854033	0.0150383	0.19624	0.433877	0.294757	0.395775	0.628485	0.576344	0.737759
ENSMUSG00000026837	Col5a1	TRUE	-0.335337	0.792599	6.44779	0.0150216	0.19624	79.0445	69.6988	79.0717	125.152	81.9738	80.3437
ENSMUSG00000031785	Gpr56	TRUE	-0.202833	0.868843	7.55901	0.0150503	0.19624	173.077	167.263	174.433	207.756	199.348	185.429
ENSMUSG00000024571	Gm16286	TRUE	0.216343	1.16179	6.71419	0.0150589	0.19624	112.473	111.509	108.776	89.7058	92.6362	104.024
ENSMUSG00000032531	Amotl2	TRUE	0.232369	1.17476	6.82308	0.015049	0.19624	130.084	127.721	110.796	110.592	95.6287	107.515
ENSMUSG00000079055	Slc8a3	TRUE	0.728512	1.65693	1.3812	0.0150602	0.19624	4.69376	2.35806	2.72876	1.57121	2.0837	2.24926
ENSMUSG00000094338	Hist1h2bl	TRUE	1.14488	2.21128	-1.71076	0.0150078	0.19624	0.256382	0.317431	0.416605	0.167596	0.110835	0.161947
ENSMUSG00000022885	St6gal1	TRUE	-0.227413	0.854165	5.4278	0.015099	0.196468	40.6464	37.3888	40.7648	50.6559	44.4006	44.0676
ENSMUSG00000029371	Cxcl5	TRUE	2.18782	4.55617	-2.40299	0.0150975	0.196468	0.729702	0.0226736	0.0833211	0.0209495	0.0665012	0.0899706
ENSMUSG00000029725	Ppp1r35	TRUE	0.340146	1.26589	3.96905	0.0151126	0.196507	15.9154	19.522	16.7267	15.356	12.1476	13.6755
ENSMUSG00000031099	Smarca1	TRUE	-0.240154	0.846655	5.40857	0.0151695	0.196969	40.2519	39.112	42.2646	51.0121	43.9795	48.6561
ENSMUSG00000097758	AL591207.1	FALSE	0.885443	1.84733	0.42738	0.015165	0.196969	1.75523	1.47379	1.64559	0.775132	0.509843	1.33156
ENSMUSG00000096753	Fam181a	TRUE	0.525562	1.43949	4.05071	0.0151855	0.197038	24.2379	19.1819	13.623	14.2038	10.4185	14.9891
ENSMUSG00000001518	Itfg2	TRUE	0.24018	1.18114	4.96983	0.0152177	0.197317	33.1521	32.1512	35.099	27.1506	28.8837	28.9705
ENSMUSG00000087541	Gm15830	FALSE	-1.34517	0.393608	-2.19648	0.0153252	0.197325	0.138052	0.0906946	0.0624908	0.41899	0.199504	0.143953
ENSMUSG00000041559	Fmod	TRUE	-0.80822	0.571086	0.93873	0.0152702	0.197325	1.65662	1.38309	1.45812	3.91756	1.46303	2.50118
ENSMUSG00000029189	Sel1l3	TRUE	-0.712674	0.610188	4.67352	0.0153229	0.197325	16.1718	17.9802	22.83	35.9075	32.0093	25.4797
ENSMUSG00000049119	Fam110b	TRUE	-0.408536	0.753388	3.84195	0.0153159	0.197325	11.0441	11.4275	12.6648	16.3406	16.7361	13.5856
ENSMUSG00000046157	Tmem229b	TRUE	-0.338711	0.790748	3.70103	0.0152321	0.197325	10.7286	11.6543	11.9566	13.68	15.2953	14.4493
ENSMUSG00000037270	4932438A13Rik	TRUE	-0.221104	0.857908	6.24594	0.0152754	0.197325	73.7788	66.8192	72.2394	85.5788	81.9738	80.5777
ENSMUSG00000025917	Cops5	TRUE	0.169826	1.12492	6.82763	0.0153018	0.197325	116.476	119.83	119.087	101.5	104.34	110.034
ENSMUSG00000025580	Eif4a3	TRUE	0.188256	1.13939	7.47361	0.0152899	0.197325	195.994	197.782	184.827	166.36	168.514	172.923
ENSMUSG00000033918	Parl	TRUE	0.225221	1.16896	5.64412	0.0152871	0.197325	50.4283	56.4347	51.0966	41.1658	46.9055	47.0186
ENSMUSG00000024990	Rbp4	TRUE	0.810667	1.75402	-1.13882	0.0152993	0.197325	0.670537	0.566841	0.458266	0.272344	0.288172	0.395871
ENSMUSG00000081600	Gm12286	FALSE	0.971885	1.9614	-1.16011	0.0153364	0.197332	0.35499	0.725557	0.291624	0.188546	0.288172	0.215929
ENSMUSG00000062822	4833420G17Rik	TRUE	0.189935	1.14071	5.90626	0.0153497	0.197366	61.3147	64.5065	65.1571	54.8668	55.994	56.5375
ENSMUSG00000040749	Siah1b	TRUE	0.268264	1.20436	4.98801	0.0153814	0.197498	33.5071	35.847	32.3911	25.8726	28.0857	30.482
ENSMUSG00000034932	Mrpl54	TRUE	0.309534	1.23931	4.74757	0.0153725	0.197498	29.0106	30.8362	27.3293	24.2595	22.1671	23.8962
ENSMUSG00000000594	Gm2a	TRUE	-0.41827	0.748322	2.91995	0.0154168	0.197624	6.66593	6.05386	6.26991	9.82532	7.86931	7.70148
ENSMUSG00000031146	Plp2	TRUE	-0.290754	0.817475	4.35564	0.015506	0.197624	16.7634	18.479	19.8096	25.1394	22.1227	20.0994
ENSMUSG00000000325	Arvcf	TRUE	-0.209755	0.864684	7.51665	0.015437	0.197624	165.544	162.978	164.892	197.575	191.834	181.255
ENSMUSG00000033952	Aspm	TRUE	-0.201527	0.86963	7.73277	0.0154852	0.197624	212.126	195.946	200.45	232.519	237.72	229.551
ENSMUSG00000028796	Phc2	TRUE	-0.1833	0.880686	7.91206	0.015482	0.197624	208.715	224.605	233.278	245.696	256.118	255.067
ENSMUSG00000020528	Prpsap2	TRUE	0.18975	1.14057	6.06264	0.0154659	0.197624	67.4284	72.8731	71.552	60.6488	63.3978	61.6838
ENSMUSG00000028882	Ppp1r8	TRUE	0.189873	1.14066	7.13603	0.0155303	0.197624	144.146	151.573	145.645	124.231	129.966	132.707
ENSMUSG00000033819	Ppp1r16a	TRUE	0.212684	1.15884	5.75632	0.0154774	0.197624	58.0803	55.1876	56.325	51.0959	45.775	49.4658
ENSMUSG00000058569	Tmed9	TRUE	0.212744	1.15889	7.07963	0.0155142	0.197624	136.711	149.51	142.146	121.088	117.774	130.709
ENSMUSG00000053317	Sec61b	TRUE	0.214872	1.1606	6.11726	0.0154123	0.197624	70.3078	76.6142	74.2807	65.1739	59.5629	65.8045
ENSMUSG00000049969	Plekhf2	TRUE	0.279339	1.21364	4.75627	0.015492	0.197624	28.7936	32.7861	28.1833	22.9188	24.3838	26.6133
ENSMUSG00000020910	Adprm	TRUE	0.308214	1.23817	4.11213	0.0155242	0.197624	17.2959	19.0912	19.8929	13.7219	15.2731	16.4286
ENSMUSG00000020781	Tsen54	TRUE	0.308859	1.23873	4.30733	0.0154842	0.197624	20.2936	21.7667	21.3719	17.0739	15.4504	18.6419
ENSMUSG00000032372	Plscr2	TRUE	-1.4563	0.364425	-1.07398	0.0155556	0.197628	0.177495	0.158716	0.416605	0.963678	0.709346	0.413865
ENSMUSG00000051251	Nhlh1	TRUE	-0.623228	0.649217	4.48376	0.0155965	0.197628	18.2228	15.0326	18.6014	31.5081	28.263	20.1354
ENSMUSG00000037940	Inpp4b	TRUE	-0.550457	0.682804	1.76037	0.0155982	0.197628	2.91881	2.56212	2.99956	5.32118	3.48023	3.63481
ENSMUSG00000033965	Slc16a2	TRUE	-0.49923	0.707484	5.60463	0.0155939	0.197628	31.6533	45.2112	44.0977	66.0538	46.4843	58.4089
ENSMUSG00000023186	Vwa5a	TRUE	-0.381041	0.767883	3.60754	0.0156163	0.197628	10.275	10.0444	11.0609	16.5501	11.2165	13.0997
ENSMUSG00000048644	Ctxn1	TRUE	-0.22313	0.856705	6.08006	0.015577	0.197628	67.0537	57.6817	59.4287	77.5551	71.7991	65.6965
ENSMUSG00000024258	Polr2d	TRUE	0.197185	1.14646	6.23756	0.0156074	0.197628	77.4667	82.4867	75.5722	65.9491	67.5652	71.8685
ENSMUSG00000025602	Zfp202	TRUE	0.275677	1.21056	4.15688	0.0155734	0.197628	18.7356	20.4516	19.143	16.0054	16.1155	16.0508
ENSMUSG00000028028	Alpk1	TRUE	-0.612404	0.654106	2.62994	0.0156389	0.197779	5.67984	4.39869	4.79096	9.46918	7.5368	5.75812
ENSMUSG00000038259	Gdf5	TRUE	-1.13075	0.45668	-0.697096	0.0157845	0.19921	0.374712	0.385452	0.437436	1.59216	0.354673	0.683776
ENSMUSG00000029004	Mll5	TRUE	-0.239316	0.847147	7.3965	0.0157637	0.19921	167.378	149.533	164.83	188.001	201.72	179.005
ENSMUSG00000026278	Bok	TRUE	0.308426	1.23836	4.48699	0.0157796	0.19921	21.9699	24.6689	23.2466	19.5459	19.6622	17.2384
ENSMUSG00000025085	Ablim1	TRUE	-0.23645	0.848831	5.73543	0.0158136	0.199441	51.9666	45.6647	47.7846	62.2829	55.462	53.6225
ENSMUSG00000039601	Rcan2	TRUE	-0.74076	0.598424	3.76547	0.0158532	0.199805	10.768	8.86539	10.7276	18.3099	19.4405	13.0097
ENSMUSG00000025280	Polr3a	TRUE	0.21509	1.16078	5.45489	0.0158697	0.199876	48.8309	44.463	47.5347	39.7412	40.8982	40.7027
ENSMUSG00000087412	Gm15501	FALSE	-0.714758	0.609308	0.194923	0.0159145	0.199948	0.867754	1.06566	0.958192	2.2416	1.28569	1.2236
ENSMUSG00000027715	Ccna2	TRUE	-0.181681	0.881675	8.09042	0.0159286	0.199948	249.006	264.601	248.005	279.886	295.022	288.896
ENSMUSG00000027905	Ddx20	TRUE	0.204547	1.15232	6.05107	0.0158885	0.199948	67.5862	74.8457	69.2398	57.0246	59.6959	66.8841
ENSMUSG00000001674	Ddx18	TRUE	0.219673	1.16447	6.59742	0.0159254	0.199948	101.231	107.745	99.7978	82.5411	88.4466	94.1272
ENSMUSG00000023571	Fam132a	TRUE	0.404625	1.32375	3.13396	0.0159404	0.199948	10.6497	10.0444	8.89452	7.54182	6.36195	8.42125
ENSMUSG00000095868	Gm23136	FALSE	0.799723	1.74077	0.29655	0.0159375	0.199948	1.26219	1.51913	1.5831	0.670384	0.931017	0.899706
ENSMUSG00000086735	Gm13977	FALSE	1.24783	2.37483	-2.24199	0.01598	0.200309	0.23666	0.204063	0.291624	0.104748	0.133002	0.0719765
ENSMUSG00000045102	Poln	TRUE	0.618384	1.53516	0.739357	0.0159914	0.200316	1.81439	2.08598	1.89555	1.29887	1.15269	1.31357
ENSMUSG00000022890	Atp5j	TRUE	0.184321	1.13628	6.93695	0.0160094	0.200405	124.049	130.011	129.085	107.136	112.055	117.951
ENSMUSG00000033852	Pla2g4b	TRUE	0.265185	1.20179	5.81036	0.0160561	0.200854	64.549	54.4394	61.3451	51.7034	52.4695	45.939
ENSMUSG00000046934	Csl	TRUE	1.20856	2.31107	-1.98802	0.0160686	0.200874	0.35499	0.204063	0.333284	0.125697	0.133002	0.125959
ENSMUSG00000026620	Mark1	TRUE	0.23964	1.1807	5.71598	0.0160903	0.201008	53.8599	55.8905	59.2204	48.121	47.1715	47.8104
ENSMUSG00000003865	Gys1	TRUE	-0.198498	0.871458	5.69122	0.0161143	0.201173	48.6534	46.7304	48.6595	56.7732	52.8241	55.6918
ENSMUSG00000024431	Nr3c1	TRUE	-0.380854	0.767983	3.56829	0.0162434	0.202647	9.80167	10.5886	12.269	16.9901	12.3471	13.1897
ENSMUSG00000030269	Mtmr14	TRUE	-0.215711	0.861122	5.23006	0.0162995	0.203073	34.3354	34.3506	32.8702	41.2705	39.0584	37.6257
ENSMUSG00000070643	Sox13	TRUE	0.30258	1.23335	5.6697	0.0162988	0.203073	62.2613	57.7498	48.9928	42.737	43.5361	50.7254
ENSMUSG00000022400	Rbx1	TRUE	0.184758	1.13663	7.04015	0.0163146	0.203124	134.324	145.111	136.938	123.309	123.182	119.823
ENSMUSG00000026578	Ccdc181	TRUE	-0.278842	0.824252	4.20806	0.0163298	0.203176	16.8029	16.1436	18.1432	19.2945	21.8124	20.8912
ENSMUSG00000028902	Sf3a3	TRUE	0.198022	1.14712	7.52368	0.0163817	0.203685	197.848	200.934	187.514	160.201	169.29	181.561
ENSMUSG00000001642	Akr1b3	TRUE	0.250728	1.18981	6.57039	0.0164117	0.203784	99.2592	107.428	99.277	79.3568	83.8137	93.9293
ENSMUSG00000040767	Snrnp25	TRUE	0.270689	1.20638	4.85996	0.0164058	0.203784	29.4247	31.1082	30.433	25.9145	23.8074	25.6596
ENSMUSG00000024750	Zfand5	TRUE	0.189645	1.14048	6.81322	0.0164242	0.203801	121.742	116.18	117.712	94.5871	111.146	106.111
ENSMUSG00000033082	Clec1a	TRUE	-0.834843	0.560644	0.321994	0.0164362	0.203813	0.650815	0.702883	1.04151	1.48742	1.57386	1.2236
ENSMUSG00000019856	Fam184a	TRUE	-0.304742	0.809587	4.07932	0.0165343	0.204892	15.0476	15.6902	16.2059	18.3937	19.6622	19.9195
ENSMUSG00000097680	AC130277.1	FALSE	0.549037	1.46311	0.581018	0.0165464	0.204905	1.67634	1.97261	1.70808	1.21507	1.35219	1.09764
ENSMUSG00000081169	Gm12551	FALSE	1.41059	2.65845	-1.55044	0.0166007	0.205439	0.70998	0.272084	0.291624	0.188546	0.0665012	0.215929
ENSMUSG00000047986	Palm3	TRUE	0.540165	1.45414	2.87715	0.0166724	0.206189	8.7367	9.88571	8.83203	6.53625	4.92109	7.39558
ENSMUSG00000028495	Rps6	TRUE	0.235727	1.1775	8.89482	0.016714	0.206565	501.483	520.496	495.656	410.946	426.539	451.346
ENSMUSG00000030232	Aebp2	TRUE	0.216702	1.16207	6.79864	0.0167363	0.206702	115.037	121.395	120.545	90.2086	110.946	106.021
ENSMUSG00000026602	Nphs2	TRUE	-1.67608	0.312932	-2.71103	0.01678	0.206826	0.0394434	0.0226736	0.0833211	0.251394	0.0886683	0.143953
ENSMUSG00000028020	Glrb	TRUE	-0.466278	0.72383	3.24574	0.0167582	0.206826	7.41535	7.79973	8.56124	11.0613	12.0146	9.7888
ENSMUSG00000048371	Pdp2	TRUE	-0.282459	0.822188	4.28217	0.0167782	0.206826	18.775	18.275	17.06	22.1017	22.7877	20.9452
ENSMUSG00000026904	Slc4a10	TRUE	-1.57095	0.336588	-0.191664	0.01689	0.207766	0.216938	0.294757	0.583247	1.80166	0.820182	0.647788
ENSMUSG00000049493	Pls1	TRUE	-0.470791	0.721569	2.62002	0.0168856	0.207766	4.53599	5.419	4.99926	8.04461	5.91861	6.74779
ENSMUSG00000028010	Gar1	TRUE	0.234451	1.17646	6.09354	0.016883	0.207766	73.2266	77.5665	70.2397	56.9408	65.6145	65.3007
ENSMUSG00000029185	Fam114a1	TRUE	-0.323097	0.799352	4.24225	0.0169104	0.207838	17.9664	17.2546	17.2891	26.3754	18.975	20.3513
ENSMUSG00000032558	Nphp3	TRUE	-0.30882	0.807302	4.70394	0.0169184	0.207838	21.753	22.9684	25.4754	32.8069	28.7285	25.4437
ENSMUSG00000050345	4930486L24Rik	TRUE	-1.4926	0.355373	-2.75259	0.0170359	0.208036	0.0394434	0.0906946	0.0416605	0.104748	0.243838	0.143953
ENSMUSG00000035095	Fam167a	TRUE	-0.285398	0.820515	4.85426	0.0170292	0.208036	24.6521	26.6189	27.6834	34.1896	32.5413	29.5104
ENSMUSG00000046139	Patl1	TRUE	-0.179783	0.882836	6.29187	0.0169983	0.208036	79.36	70.7871	72.8018	82.2478	87.9146	82.449
ENSMUSG00000049327	Setd8	TRUE	-0.178187	0.883813	7.2991	0.0169684	0.208036	141.779	158.806	149.79	161.165	175.807	172.564
ENSMUSG00000032397	Tipin	TRUE	0.188721	1.13975	6.87557	0.0169543	0.208036	118.429	126.632	118.274	97.918	109.527	111.294
ENSMUSG00000027890	Gstm4	TRUE	0.388238	1.30879	2.84034	0.0170302	0.208036	7.43507	7.9131	8.72788	6.36865	5.5861	6.4239
ENSMUSG00000032561	Acpp	TRUE	0.945974	1.92649	-1.21187	0.0169858	0.208036	0.394434	0.408126	0.520757	0.167596	0.221671	0.287906
ENSMUSG00000036523	Greb1	TRUE	0.967204	1.95505	5.32682	0.0169771	0.208036	70.5444	49.1565	40.1607	21.2009	22.1006	38.4534
ENSMUSG00000091449	Gm10269	TRUE	1.38405	2.61	-2.37704	0.017006	0.208036	0.256382	0.204063	0.249963	0.0628485	0.199504	0.0179941
ENSMUSG00000036432	Siah2	TRUE	-0.374082	0.771596	3.01189	0.0170729	0.208213	6.56732	6.80209	7.06146	9.82532	8.40132	8.2593
ENSMUSG00000022865	Cxadr	TRUE	-0.17952	0.882997	7.88553	0.0170643	0.208213	210.825	234.06	230.57	247.896	260.862	256.164
ENSMUSG00000028040	Efna4	TRUE	0.29944	1.23067	4.29511	0.0171098	0.208525	20.8655	21.9934	20.6845	18.0585	15.7165	17.8322
ENSMUSG00000035184	Fam124a	TRUE	-0.682493	0.623088	3.56674	0.0171379	0.20873	8.61837	7.95845	10.4151	15.2931	17.2016	10.8505
ENSMUSG00000055609	Hba-x	TRUE	-0.504571	0.70487	10.5067	0.0171608	0.208871	1016.73	914.972	1476.14	1685.77	1295.95	1852.98
ENSMUSG00000040943	Tet2	TRUE	0.345723	1.27079	5.82321	0.017185	0.20889	72.063	56.2533	65.5112	53.6098	53.3783	45.5791
ENSMUSG00000085900	A930041C12Rik	FALSE	1.12687	2.18384	-2.1301	0.0171823	0.20889	0.276103	0.340105	0.145812	0.104748	0.110835	0.125959
ENSMUSG00000027030	Stk39	TRUE	-0.279204	0.824045	6.63481	0.0172072	0.209022	77.447	91.6015	92.7155	95.8231	123.116	98.7337
ENSMUSG00000023022	Lima1	TRUE	-0.221318	0.857781	6.23264	0.0172478	0.20924	68.1778	65.7082	75.9471	88.3022	78.5823	77.7706
ENSMUSG00000073010	Gm5127	TRUE	1.05155	2.07275	0.280909	0.017247	0.20924	2.78076	1.51913	1.29148	0.900829	0.487676	1.29558
ENSMUSG00000064127	Med14	TRUE	-0.183949	0.88029	7.07047	0.0172709	0.209288	125.095	125.272	128.439	132.862	156.278	141.218
ENSMUSG00000047026	Acsm4	TRUE	1.95829	3.88601	-2.91875	0.0172744	0.209288	0.138052	0.0906946	0.104151	0	0.0443341	0.0359882
ENSMUSG00000004945	Tmem242	TRUE	0.222208	1.16652	5.7332	0.0172903	0.209321	53.2288	58.362	57.6165	48.3096	48.6124	48.1163
ENSMUSG00000017400	Stac2	TRUE	0.73151	1.66038	-0.286686	0.0172998	0.209321	1.20302	1.02031	0.958192	0.607536	0.620678	0.683776
ENSMUSG00000023224	Serping1	TRUE	-0.331455	0.794735	4.22383	0.0173139	0.209354	15.9943	17.0052	16.8517	22.8978	20.8592	18.9838
ENSMUSG00000027365	Trpm7	TRUE	0.1685	1.12389	7.36583	0.0173456	0.2096	182.13	178.374	171.537	149.6	161.509	162.271
ENSMUSG00000060131	Atp8b4	TRUE	-1.07519	0.474609	-1.06703	0.0173966	0.209808	0.216938	0.226736	0.291624	0.481839	0.554177	0.521829
ENSMUSG00000041891	Lman1	TRUE	0.239396	1.1805	6.8088	0.0173806	0.209808	139.314	124.456	115.004	105.669	101.104	114.065
ENSMUSG00000031320	Rps4x	TRUE	0.280205	1.21437	10.2659	0.0173968	0.209808	1249.05	1397.56	1325.05	1028.22	1060.69	1181.6
ENSMUSG00000027859	Ngf	TRUE	-1.44158	0.368163	-2.52545	0.0174275	0.209997	0.0788867	0.0453473	0.0624908	0.188546	0.155169	0.179941
ENSMUSG00000027452	Acss1	TRUE	-0.755139	0.592489	5.41663	0.0174922	0.209997	26.4073	27.095	38.8276	53.5889	60.8043	41.4584
ENSMUSG00000003279	Dlgap1	TRUE	-0.740063	0.598713	-0.0157764	0.0174687	0.209997	0.808589	0.589515	0.604078	1.25697	1.17485	0.935694
ENSMUSG00000036854	Hspb6	TRUE	-0.446651	0.733744	2.12149	0.0174899	0.209997	3.96406	3.7865	3.27035	5.09073	4.63292	5.29027
ENSMUSG00000050875	A730017C20Rik	TRUE	0.512611	1.42663	4.05219	0.0174811	0.209997	30.4503	14.9646	15.2894	16.2568	12.3471	13.9634
ENSMUSG00000098061	RP23-204I16.2	FALSE	0.626659	1.54398	0.808751	0.0174359	0.209997	2.56382	2.17667	2.18718	1.42457	1.41869	1.63746
ENSMUSG00000030621	Me3	TRUE	0.854153	1.8077	0.0536677	0.0174522	0.209997	1.49885	1.06566	1.22899	0.565637	0.775847	0.755753
ENSMUSG00000061477	Rps7	TRUE	0.259337	1.19693	9.28422	0.0175187	0.210043	630.423	716.578	703.938	561.761	549.633	602.065
ENSMUSG00000052504	Epha3	TRUE	0.468913	1.38407	7.10348	0.0175131	0.210043	181.893	152.072	125.273	116.123	94.3874	121.28
ENSMUSG00000085870	Gm12829	FALSE	0.732122	1.66108	0.593632	0.0175807	0.210649	1.83412	1.90459	1.97888	1.67596	1.01969	0.755753
ENSMUSG00000021285	Ppp1r13b	TRUE	-0.361738	0.778227	3.55327	0.0176266	0.211062	10.5314	9.84036	11.04	16.0683	12.2806	12.0381
ENSMUSG00000041703	Zic5	TRUE	-0.283595	0.821541	5.98501	0.0176676	0.211416	53.5246	59.7224	63.6781	74.3498	65.5924	75.3774
ENSMUSG00000036138	Acaa1a	TRUE	0.226602	1.17008	5.43419	0.0176912	0.211561	43.506	46.8437	44.0977	38.987	37.6619	38.2375
ENSMUSG00000021835	Bmp4	TRUE	-0.4418	0.736216	4.38662	0.0177261	0.211567	16.2704	19.7714	19.7679	33.9382	17.645	24.2021
ENSMUSG00000086537	Nespas	FALSE	0.493864	1.40821	1.37937	0.0177256	0.211567	3.01742	2.85688	2.87458	1.75976	2.21671	2.23127
ENSMUSG00000093460	Six3os1	FALSE	0.543841	1.45785	6.69528	0.0177072	0.211567	157.773	114.275	122.794	83.9238	89.9096	97.0063
ENSMUSG00000029674	Limk1	TRUE	-0.195414	0.873322	6.04919	0.0177702	0.211957	59.9736	60.9241	62.6366	70.977	70.0701	69.1154
ENSMUSG00000003363	Pld3	TRUE	-0.283376	0.821666	4.66336	0.0177946	0.212069	23.7843	22.5603	22.83	32.7441	25.5365	25.9295
ENSMUSG00000039671	Zmynd8	TRUE	-0.153346	0.899163	7.08602	0.0178063	0.212069	133.595	133.389	129.71	150.627	142.024	148.505
ENSMUSG00000079396	Gm3411	TRUE	0.658969	1.57895	-0.327566	0.0178141	0.212069	0.887475	0.952293	0.854041	0.586586	0.598511	0.521829
ENSMUSG00000097566	AC154378.1	FALSE	-0.821519	0.565846	-0.444491	0.0178355	0.212188	0.512764	0.317431	0.583247	0.775132	0.953184	0.791741
ENSMUSG00000052920	Prkg1	TRUE	-0.574176	0.67167	3.31321	0.0178907	0.212296	8.89448	7.18754	8.89452	16.6339	11.2609	9.32095
ENSMUSG00000022186	Oxct1	TRUE	-0.181007	0.882087	7.69987	0.0178754	0.212296	192.444	194.699	195.346	213.35	226.038	220.968
ENSMUSG00000008540	Mgst1	TRUE	0.393233	1.31333	3.34606	0.01788	0.212296	11.695	12.1077	11.9774	9.07114	8.17965	9.96874
ENSMUSG00000088909	Gm25432	FALSE	1.39387	2.62783	-2.52166	0.0178904	0.212296	0.276103	0.113368	0.145812	0.0837981	0.0443341	0.0719765
ENSMUSG00000085627	Gm11222	FALSE	0.871868	1.83003	-1.28202	0.0179464	0.212821	0.394434	0.453473	0.520757	0.251394	0.177337	0.3059
ENSMUSG00000033763	Mtss1l	TRUE	-0.171303	0.88804	6.39534	0.017961	0.212857	79.0248	75.8433	78.4884	87.8832	88.757	86.1738
ENSMUSG00000019054	Fis1	TRUE	0.172774	1.12722	6.27117	0.0179819	0.212968	79.36	78.3601	79.6966	72.4644	65.1047	73.0021
ENSMUSG00000038102	Trappc11	TRUE	-0.165749	0.891466	6.23103	0.0180172	0.213204	74.4099	69.5401	71.0937	82.3735	80.8876	78.0225
ENSMUSG00000029814	Igf2bp3	TRUE	0.225885	1.16949	7.30806	0.0180249	0.213204	175.385	170.438	161.872	134.307	143.421	156.351
ENSMUSG00000028883	Sema3a	TRUE	-0.406282	0.754565	4.33133	0.0180515	0.213382	20.3133	14.8512	18.5389	28.1771	21.4577	21.5749
ENSMUSG00000056820	Tsnax	TRUE	0.179783	1.13271	6.71334	0.0181771	0.21473	113.419	111.237	107.797	92.3245	94.9637	106.147
ENSMUSG00000030125	Lrrc23	TRUE	-0.679857	0.624227	2.83908	0.0182508	0.215325	4.39793	5.91782	6.58236	10.5167	7.60331	8.94308
ENSMUSG00000036513	Commd2	TRUE	0.217309	1.16256	5.34366	0.0182471	0.215325	41.3169	42.241	45.5974	35.1742	37.5954	38.3095
ENSMUSG00000022053	Ebf2	TRUE	-0.538202	0.688629	4.51367	0.0183316	0.216139	19.5047	16.6425	18.289	27.6324	29.5487	21.8988
ENSMUSG00000051586	Mical3	TRUE	-0.250043	0.840872	4.98923	0.018394	0.216461	31.6138	28.4781	28.6	35.5513	35.2235	34.7286
ENSMUSG00000024579	Pcyox1l	TRUE	-0.242417	0.845328	4.97801	0.0183851	0.216461	30.1742	29.4984	28.9541	34.5038	37.285	33.0912
ENSMUSG00000018167	Stard3	TRUE	0.271364	1.20695	4.89265	0.0183855	0.216461	31.4758	31.539	32.5369	26.2707	24.8715	27.9988
ENSMUSG00000085363	Gm15478	FALSE	-1.6043	0.328896	-2.7373	0.0184088	0.216497	0.059165	0.0680209	0.0208303	0.146647	0.133002	0.179941
ENSMUSG00000028044	Cks1b	TRUE	0.179178	1.13224	6.83148	0.0184451	0.216648	113.557	122.528	119.128	99.7197	103.166	110.772
ENSMUSG00000021871	Pnp	TRUE	0.261092	1.19839	6.03755	0.0184409	0.216648	67.6848	73.78	70.7812	55.9143	55.6393	65.4986
ENSMUSG00000028134	Ptbp2	TRUE	-0.234191	0.850162	8.68241	0.0185505	0.217747	370.511	382.255	380.027	423.264	473.466	435.728
ENSMUSG00000037526	Atg14	TRUE	0.254503	1.19292	4.39938	0.0186055	0.218255	22.9166	22.855	22.705	19.5249	18.5982	19.2717
ENSMUSG00000002791	Pdxk-ps	FALSE	1.33081	2.51543	-2.41066	0.018636	0.218473	0.256382	0.204063	0.166642	0.125697	0.110835	0.0179941
ENSMUSG00000015224	Cyp2j9	TRUE	-0.64215	0.640757	0.331853	0.0187256	0.218875	1.08469	0.884272	0.895701	1.46647	1.6182	1.40354
ENSMUSG00000032009	Sesn3	TRUE	-0.260455	0.834825	5.28982	0.0187295	0.218875	41.6127	31.6978	34.4949	43.7635	44.711	40.7387
ENSMUSG00000056763	Cspp1	TRUE	-0.174158	0.886285	6.11736	0.0187177	0.218875	67.2115	64.3025	69.5523	72.7367	79.0256	75.1434
ENSMUSG00000010067	Rassf1	TRUE	0.300366	1.23146	3.81475	0.0187201	0.218875	15.1068	16.4837	15.2269	12.465	12.6352	12.9018
ENSMUSG00000082779	Gm13162	FALSE	1.13303	2.19318	-2.40968	0.0187081	0.218875	0.197217	0.226736	0.249963	0.125697	0.0665012	0.107965
ENSMUSG00000018196	Glrx2	TRUE	-0.290939	0.81737	5.44717	0.0187827	0.219358	35.1046	39.5655	41.0773	45.5442	50.2528	45.813
ENSMUSG00000072494	Ppp1r3e	TRUE	-0.485334	0.714332	2.15056	0.0187976	0.219392	3.43157	3.71848	3.93692	4.98598	6.29545	4.26461
ENSMUSG00000021904	Sema3g	TRUE	0.358357	1.28197	3.38599	0.0188373	0.219717	12.5627	11.3141	12.0399	9.25969	9.2215	9.53688
ENSMUSG00000025885	Myo5b	TRUE	-0.333709	0.793494	4.8276	0.0189127	0.22038	20.4711	26.0293	22.4342	23.1283	34.1816	29.5463
ENSMUSG00000033885	Pxk	TRUE	-0.329895	0.795594	4.16132	0.0189419	0.22038	15.6196	15.4181	16.5392	22.1017	18.7977	18.9118
ENSMUSG00000025025	Mxi1	TRUE	-0.238098	0.847862	5.07763	0.0189386	0.22038	30.9236	32.378	29.6831	36.515	37.5289	35.6284
ENSMUSG00000024054	Smchd1	TRUE	-0.179932	0.882744	7.78324	0.018939	0.22038	219.759	210.933	198.658	225.27	248.737	238.962
ENSMUSG00000026879	Gsn	TRUE	-0.40579	0.754823	4.01593	0.0190367	0.221344	12.6219	15.0326	14.2479	23.8824	14.4308	17.1844
ENSMUSG00000003762	Adck4	TRUE	0.284108	1.21766	4.02477	0.0190577	0.221448	18.9131	17.3227	16.081	14.7904	13.5219	14.6472
ENSMUSG00000039599	Fam149b	TRUE	-0.201572	0.869602	5.68583	0.0190932	0.221722	49.107	47.0025	47.1597	54.5316	56.3044	53.9464
ENSMUSG00000097092	AC132284.1	FALSE	-1.49312	0.355243	-1.89921	0.0191694	0.222466	0.157773	0.0906946	0.124982	0.733233	0.0665012	0.269912
ENSMUSG00000030180	Kdm5a	TRUE	0.161073	1.11812	7.03413	0.0192138	0.222701	146.138	133.843	138.98	122.576	124.978	127.164
ENSMUSG00000034656	Cacna1a	TRUE	0.284485	1.21798	4.33601	0.0192133	0.222701	25.7171	21.676	21.9551	17.7233	18.6203	20.5853
ENSMUSG00000002771	Grin2d	TRUE	-0.626161	0.647898	0.323988	0.0193042	0.223189	0.769145	0.929619	1.02068	1.44552	1.44086	1.31357
ENSMUSG00000040824	Snrpd2	TRUE	0.196273	1.14573	6.91777	0.0192826	0.223189	122.491	129.716	128.46	109.922	106.845	115.432
ENSMUSG00000021481	Zfp346	TRUE	0.217708	1.16288	5.16755	0.0192999	0.223189	37.767	35.8244	39.7441	31.6757	33.6718	32.1375
ENSMUSG00000043541	Casc1	TRUE	0.59119	1.50649	0.488148	0.0192898	0.223189	1.53829	1.67785	1.62476	1.02653	1.06402	1.11564
ENSMUSG00000074637	Sox2	TRUE	-0.192558	0.875053	7.99458	0.0193182	0.223211	233.662	254.149	236.694	260.78	290.788	276.372
ENSMUSG00000064115	Cadm2	TRUE	-0.85498	0.552873	1.37474	0.0194868	0.224737	1.79467	1.45111	1.85389	3.64522	3.05906	2.53717
ENSMUSG00000004031	Fam5b	TRUE	-0.723525	0.605616	2.22188	0.0194697	0.224737	3.13575	2.90223	3.89526	5.99156	6.18461	4.24661
ENSMUSG00000019987	Arg1	TRUE	0.933025	1.90928	-0.343032	0.019478	0.224737	1.55801	0.974967	0.79155	0.314243	0.665012	0.755753
ENSMUSG00000047832	Cdca4	TRUE	0.183737	1.13582	6.91652	0.0195146	0.224917	118.212	131.643	123.898	104.475	107.377	117.124
ENSMUSG00000053835	H2-T24	TRUE	-0.466352	0.723793	2.85148	0.019532	0.224978	6.76454	5.87247	7.24893	8.90354	10.3964	8.20532
ENSMUSG00000022978	Mis18a	TRUE	0.225916	1.16952	5.65883	0.0195656	0.225224	52.0455	56.2306	52.6172	44.6015	45.4868	47.4505
ENSMUSG00000079465	Col4a3	TRUE	1.24738	2.37409	-2.11026	0.0195793	0.225241	0.512764	0.24941	0.145812	0.125697	0.0886683	0.161947
ENSMUSG00000020647	Ncoa1	TRUE	-0.342785	0.788518	5.13579	0.0196577	0.225581	31.5744	28.4554	31.7453	41.5638	40.7874	34.0809
ENSMUSG00000010205	Raver1	TRUE	-0.164093	0.89249	7.48075	0.0196472	0.225581	167.102	169.395	165.601	188.567	184.696	189.298
ENSMUSG00000039725	2810408M09Rik	TRUE	0.280644	1.21474	4.96054	0.0196255	0.225581	32.2055	34.804	33.2451	25.7889	28.2408	28.4847
ENSMUSG00000064917	Gm22574	FALSE	0.789008	1.72789	-0.611684	0.0196385	0.225581	0.769145	1.04299	0.499926	0.335192	0.487676	0.503835
ENSMUSG00000026478	Lamc1	TRUE	-0.223631	0.856407	7.11826	0.0197295	0.225945	132.944	118.742	126.148	169.565	137.17	134.506
ENSMUSG00000069495	Epc2	TRUE	-0.204944	0.867573	6.21641	0.0197377	0.225945	71.0572	68.0663	71.1354	79.273	85.5206	77.6086
ENSMUSG00000027374	Mrps5	TRUE	-0.160487	0.894723	6.28015	0.0197384	0.225945	73.6605	72.737	72.2394	80.907	82.7718	80.7036
ENSMUSG00000028012	Rrh	TRUE	0.908392	1.87695	-1.1256	0.0197336	0.225945	0.867754	0.544167	0.374945	0.356142	0.310339	0.287906
ENSMUSG00000024911	Fibp	TRUE	0.237231	1.17873	4.97411	0.0198094	0.226477	33.448	31.5617	31.2246	28.1771	27.5093	25.9835
ENSMUSG00000051065	Mb21d2	TRUE	0.296733	1.22836	4.22689	0.0198051	0.226477	21.6347	18.7511	18.8514	15.7121	14.6746	17.8142
ENSMUSG00000029659	Medag	TRUE	-0.840298	0.558528	-1.21579	0.019827	0.226539	0.256382	0.362778	0.291624	0.544687	0.642845	0.449853
ENSMUSG00000037466	4930427A07Rik	TRUE	0.20164	1.15001	5.74911	0.0198424	0.226574	53.8402	56.4347	57.2207	47.1155	48.2799	50.2216
ENSMUSG00000032033	Barx2	TRUE	3.47781	11.141	-3.27312	0.0198566	0.226596	0.453599	0.0453473	0	0	0	0.0359882
ENSMUSG00000064356	mt-Atp8	TRUE	-1.50406	0.352559	-2.7206	0.0199318	0.227242	0.059165	0.0453473	0.0624908	0.209495	0.177337	0.107965
ENSMUSG00000058581	Gm5801	FALSE	-0.738266	0.599459	-0.976389	0.0199656	0.227242	0.276103	0.362778	0.416605	0.502788	0.665012	0.593806
ENSMUSG00000060534	Dcc	TRUE	-0.518105	0.698288	5.36577	0.0200218	0.227242	37.1162	29.385	37.8486	53.924	55.3512	40.1989
ENSMUSG00000027303	Ptpra	TRUE	-0.181344	0.881881	6.31195	0.0199722	0.227242	73.621	75.8887	75.6972	84.3218	87.6043	83.4567
ENSMUSG00000045328	Cenpe	TRUE	-0.180986	0.8821	7.96985	0.0199692	0.227242	258.63	246.258	222.759	273.433	263.389	288.05
ENSMUSG00000054280	Prr14l	TRUE	0.170856	1.12573	6.21716	0.0200081	0.227242	80.4053	76.9317	80.4673	69.3638	72.6415	69.2774
ENSMUSG00000036992	Nxt1	TRUE	0.236995	1.17854	5.53197	0.0199952	0.227242	46.839	51.2651	50.1593	40.0136	41.1199	44.6254
ENSMUSG00000030534	Vps33b	TRUE	0.259506	1.19707	4.71121	0.0200363	0.227242	27.709	28.5008	28.7666	23.7986	23.7409	23.4463
ENSMUSG00000045100	Slc25a26	TRUE	0.38983	1.31024	2.73783	0.0200293	0.227242	7.39563	7.95845	7.35308	5.86586	5.36443	6.08201
ENSMUSG00000022416	Cacna1i	TRUE	0.673833	1.59531	0.0940939	0.0199856	0.227242	1.4594	1.04299	1.104	0.691334	0.798015	0.773747
ENSMUSG00000068480	Gm7551	FALSE	-1.39337	0.380676	-2.50597	0.0200811	0.227498	0.0788867	0.0906946	0.0416605	0.0628485	0.266005	0.233924
ENSMUSG00000051048	P4ha3	TRUE	-0.994922	0.501763	1.54018	0.0200835	0.227498	1.65662	1.2924	2.83292	5.38403	3.5689	2.59115
ENSMUSG00000039158	Akna	TRUE	-0.342969	0.788417	5.23202	0.0201086	0.227558	33.2705	30.6321	34.4741	46.5079	42.5386	35.7723
ENSMUSG00000005069	Pex5	TRUE	0.189136	1.14008	5.87114	0.0201134	0.227558	59.9933	59.8131	63.2823	55.0134	51.8044	53.7664
ENSMUSG00000020122	Egfr	TRUE	-0.478147	0.717899	4.12858	0.0202132	0.228546	16.0337	13.1961	14.727	24.909	20.0169	16.3387
ENSMUSG00000048776	Pthlh	TRUE	-0.825369	0.564338	0.587195	0.0203031	0.229134	0.650815	1.13368	1.3748	2.76534	1.26352	1.56549
ENSMUSG00000096971	AC158921.1	FALSE	-0.583124	0.667517	1.02845	0.0203115	0.229134	1.93272	1.65518	1.70808	3.31002	2.50488	2.1413
ENSMUSG00000078864	Gm14322	TRUE	-0.493769	0.710168	2.06721	0.0203272	0.229134	3.47102	3.55976	3.29118	4.08516	5.43093	5.02036
ENSMUSG00000070802	Pnmal2	TRUE	-0.40163	0.757003	4.25675	0.0202974	0.229134	13.9038	16.4837	17.7057	24.6366	20.039	18.8578
ENSMUSG00000030298	Sec13	TRUE	0.168809	1.12413	7.01146	0.0203216	0.229134	130.853	136.79	128.773	119.266	110.459	122.846
ENSMUSG00000022665	Ccdc80	TRUE	-0.506788	0.703788	3.76479	0.0203418	0.229159	13.3121	11.1101	10.9359	23.1492	13.4554	13.6575
ENSMUSG00000031170	Slc38a5	TRUE	-0.576667	0.670511	1.96553	0.0204005	0.229323	2.93853	2.47143	3.3745	4.33655	3.8349	4.93039
ENSMUSG00000024924	Vldlr	TRUE	-0.302574	0.810805	4.86281	0.0203838	0.229323	26.5651	24.805	26.017	36.515	30.8787	28.0888
ENSMUSG00000084159	Gm12696	FALSE	-0.236529	0.848785	5.51912	0.020406	0.229323	43.368	43.6468	45.3058	51.5149	51.0508	53.3166
ENSMUSG00000064634	Gm22620	FALSE	0.589818	1.50506	1.82518	0.0203891	0.229323	3.74712	4.46671	4.37436	2.30445	3.4359	2.62714
ENSMUSG00000046618	Olfml2a	TRUE	-0.478363	0.717792	2.48099	0.0204814	0.230029	4.53599	4.35334	5.16591	7.60467	6.80529	5.2003
ENSMUSG00000038888	Ctu1	TRUE	0.286539	1.21971	3.95197	0.0205397	0.230545	16.2507	16.2797	15.8935	13.5962	13.3002	12.8118
ENSMUSG00000035392	Dennd1a	TRUE	-0.261029	0.834492	5.81147	0.0205568	0.230596	52.5385	49.2472	50.9925	61.7382	62.1121	59.2546
ENSMUSG00000002459	Rgs20	TRUE	-0.59355	0.66271	1.56852	0.0205993	0.230932	2.0905	2.4941	2.08303	2.99578	4.12308	2.95104
ENSMUSG00000025946	Pth2r	TRUE	1.00618	2.00858	-1.06315	0.0206428	0.231279	0.631094	0.521494	0.729059	0.335192	0.332506	0.269912
ENSMUSG00000063600	Egfem1	TRUE	0.860548	1.81573	0.770204	0.0206816	0.231574	3.03714	1.83657	1.77057	0.628485	1.33002	1.69145
ENSMUSG00000041309	Nkx6-2	TRUE	1.41258	2.66212	0.0392322	0.0207108	0.23176	1.38052	1.26972	1.43729	0.0628485	0.820182	0.647788
ENSMUSG00000005397	Nid1	TRUE	-0.221861	0.857459	7.13193	0.0207421	0.23183	130.321	121.009	139.479	175.62	141.581	138.627
ENSMUSG00000006050	Sra1	TRUE	0.226483	1.16998	5.09987	0.0207354	0.23183	35.144	37.3208	37.2653	30.3558	31.9871	31.4357
ENSMUSG00000005583	Mef2c	TRUE	-0.280234	0.823457	4.06873	0.0207762	0.23207	15.7773	14.4431	15.2686	17.3252	19.3297	18.6059
ENSMUSG00000089417	Gm22009	FALSE	0.997477	1.99651	-1.49128	0.0208138	0.23235	0.335269	0.340105	0.499926	0.146647	0.221671	0.215929
ENSMUSG00000040312	Cchcr1	TRUE	0.216994	1.16231	5.32124	0.0208893	0.232911	44.6893	40.3818	41.9313	37.0597	36.6643	35.5744
ENSMUSG00000028454	Pigo	TRUE	0.230877	1.17355	5.10599	0.0208876	0.232911	36.7415	35.5523	38.4527	31.6547	31.6324	31.0938
ENSMUSG00000019868	Vta1	TRUE	0.265618	1.20215	4.61498	0.0209413	0.233349	28.34	25.1451	25.3296	21.8294	20.7262	22.9965
ENSMUSG00000025161	Slc16a3	TRUE	-0.31243	0.805284	5.88545	0.0209887	0.233603	47.8251	56.6841	50.2218	67.5622	67.0776	57.5092
ENSMUSG00000025995	Wdr75	TRUE	0.180553	1.13332	6.63141	0.0209894	0.233603	103.835	109.74	103.36	87.8623	94.0327	97.7081
ENSMUSG00000033149	Phldb2	TRUE	-0.228006	0.853814	6.6306	0.0211212	0.234811	100.009	91.4655	88.6328	125.676	99.8183	102.602
ENSMUSG00000040694	Apobec2	TRUE	0.607604	1.52373	-0.0413122	0.0211233	0.234811	1.16358	1.08833	1.12483	0.754182	0.642845	0.809735
ENSMUSG00000025326	Ube3a	TRUE	-0.188962	0.877237	6.73918	0.0211444	0.234903	107.207	101.397	104.006	112.583	124.756	119.049
ENSMUSG00000007029	Vars	TRUE	0.227944	1.17116	8.04956	0.0211708	0.235056	275.709	283.647	262.69	220.284	232.51	249.075
ENSMUSG00000015341	Golga7	TRUE	0.178011	1.13132	6.98703	0.0212272	0.235117	130.163	135.747	131.356	108.854	121.387	120.884
ENSMUSG00000030268	Bcat1	TRUE	0.195429	1.14506	7.07982	0.0212177	0.235117	147.104	144.998	128.669	110.111	132.227	125.131
ENSMUSG00000077222	Gm22270	FALSE	0.557316	1.47153	1.32491	0.0212242	0.235117	2.76103	2.85688	2.64544	1.67596	1.97287	1.96136
ENSMUSG00000022061	Nkx3-1	TRUE	1.38837	2.61782	-1.46718	0.0212042	0.235117	0.394434	0.634862	0.416605	0.167596	0.199504	0.179941
ENSMUSG00000048450	Msx1	TRUE	-0.381126	0.767838	6.12257	0.0212605	0.235344	51.513	63.5769	63.2199	106.424	59.5186	66.2723
ENSMUSG00000061911	Myt1l	TRUE	-1.14285	0.452865	2.69698	0.0212786	0.235403	2.85964	2.87955	5.60334	9.97197	10.3077	4.78644
ENSMUSG00000025872	Thoc3	TRUE	0.199934	1.14865	6.54307	0.0212917	0.235408	96.3798	102.576	96.1108	79.3358	84.0132	93.4614
ENSMUSG00000064452	Gm24564	FALSE	0.924293	1.89775	-0.638777	0.021338	0.235778	0.926919	0.612188	0.937362	0.272344	0.642845	0.395871
ENSMUSG00000028801	Stpg1	TRUE	-0.8709	0.546806	-0.866078	0.0213849	0.236155	0.47332	0.272084	0.479096	0.984627	0.53201	0.737759
ENSMUSG00000097754	RP24-160J12.1	FALSE	-1.29339	0.407991	-1.39368	0.0214722	0.236294	0.197217	0.113368	0.229133	0.649435	0.332506	0.359882
ENSMUSG00000057762	Gm6169	TRUE	-1.18537	0.43971	-1.83779	0.0214325	0.236294	0.177495	0.181389	0.0624908	0.272344	0.487676	0.215929
ENSMUSG00000024837	Dmrt1	TRUE	-0.683754	0.622543	0.735881	0.0214778	0.236294	1.00581	1.60983	1.16649	2.74439	1.46303	1.85339
ENSMUSG00000053550	Shisa7	TRUE	-0.642606	0.640555	3.64576	0.0214871	0.236294	9.48613	8.70668	11.5191	15.1674	17.379	13.8555
ENSMUSG00000041375	Ccdc9	TRUE	0.175957	1.12971	5.86374	0.0214387	0.236294	62.143	59.9945	58.5955	52.3528	53.5556	54.0723
ENSMUSG00000070713	Gm10282	TRUE	0.33277	1.25943	3.48935	0.021439	0.236294	11.7936	11.0421	11.6025	7.87702	9.59834	9.86078
ENSMUSG00000049744	Arhgap15	TRUE	1.02074	2.02896	-1.96041	0.0214769	0.236294	0.216938	0.340105	0.354114	0.125697	0.133002	0.179941
ENSMUSG00000019970	Sgk1	TRUE	-0.332516	0.79415	4.03038	0.0215071	0.236374	16.6845	13.5362	14.5395	21.3895	18.6868	16.3387
ENSMUSG00000097650	AC101875.1	FALSE	-1.54948	0.341632	-2.90939	0.0216118	0.236642	0.0197217	0.113368	0.0416605	0.230445	0.177337	0.107965
ENSMUSG00000032769	Trpa1	TRUE	-0.723421	0.60566	-0.461078	0.0216236	0.236642	0.374712	0.544167	0.687399	0.775132	0.975351	0.899706
ENSMUSG00000028845	Tekt2	TRUE	-0.660121	0.632825	0.436203	0.0215659	0.236642	0.690259	0.816251	1.3748	1.86451	1.30786	1.38555
ENSMUSG00000011884	Gltp	TRUE	-0.202975	0.868757	5.52607	0.0215973	0.236642	41.7508	45.3473	43.6811	48.4981	49.3882	52.5968
ENSMUSG00000003573	Homer3	TRUE	0.182404	1.13477	6.00584	0.0216341	0.236642	66.8565	68.6331	66.4694	57.0455	58.4767	62.4036
ENSMUSG00000075040	Zfp408	TRUE	0.221153	1.16566	5.1299	0.021572	0.236642	37.2542	35.3255	37.2445	31.7385	31.1226	31.3637
ENSMUSG00000015112	Slc25a13	TRUE	0.244014	1.18428	5.81391	0.0215949	0.236642	59.8158	63.4635	57.1999	46.2775	51.4498	54.6301
ENSMUSG00000041420	Meis3	TRUE	0.248306	1.18781	5.14656	0.0215511	0.236642	40.3506	37.7063	37.4112	32.0109	32.6743	32.5334
ENSMUSG00000056829	Foxb2	TRUE	3.00221	8.01224	-2.67671	0.0216539	0.236718	0.808589	0.0226736	0.0208303	0.041899	0.0221671	0.0359882
ENSMUSG00000051234	Rnf7	TRUE	0.17458	1.12864	6.98317	0.021686	0.236929	131.11	134.024	129.918	110.76	119.458	119.787
ENSMUSG00000073144	4930599N23Rik	FALSE	-1.42928	0.371316	-2.64633	0.0217229	0.237014	0.059165	0.0906946	0.0208303	0.146647	0.177337	0.143953
ENSMUSG00000027994	Ccdc109b	TRUE	-0.833294	0.561246	-0.18195	0.0217708	0.237014	0.769145	0.521494	0.583247	0.963678	1.59603	0.809735
ENSMUSG00000041313	Slc7a1	TRUE	0.197387	1.14662	5.9454	0.0217444	0.237014	63.9968	65.8669	68.2191	50.9073	61.2033	60.6222
ENSMUSG00000041064	Pif1	TRUE	0.219347	1.16421	5.78418	0.0217222	0.237014	58.2184	58.7021	57.1374	48.2467	51.3833	49.8797
ENSMUSG00000069020	Urm1	TRUE	0.246793	1.18657	4.76594	0.0217597	0.237014	28.4189	26.959	29.0582	23.652	23.1203	24.382
ENSMUSG00000036634	Mag	TRUE	1.23157	2.34822	-2.09755	0.0217531	0.237014	0.216938	0.317431	0.187472	0.104748	0.0665012	0.125959
ENSMUSG00000025666	Tmem47	TRUE	0.36567	1.28848	6.37183	0.021842	0.237649	98.8253	104.843	91.6948	67.9812	69.8706	91.3381
ENSMUSG00000028909	Ptpru	TRUE	-0.408887	0.753204	6.35254	0.0219226	0.238386	57.2323	67.6808	78.7592	88.8469	102.168	79.408
ENSMUSG00000024256	Adcyap1	TRUE	-0.773092	0.585162	0.982924	0.0219643	0.238418	1.4594	1.36042	1.70808	2.51394	3.19206	2.05133
ENSMUSG00000015222	Map2	TRUE	-0.470072	0.721928	8.16753	0.021955	0.238418	251.392	219.98	255.254	342.713	376.441	287.384
ENSMUSG00000031967	Afg3l1	TRUE	0.166463	1.1223	6.45641	0.0219471	0.238418	90.5225	91.2841	87.4663	74.7898	83.1265	81.9992
ENSMUSG00000078926	Cdc20b	TRUE	-0.680042	0.624147	0.808526	0.0220697	0.238726	1.22274	1.2924	1.39563	3.01673	1.7512	1.51151
ENSMUSG00000030411	Nova2	TRUE	-0.392435	0.761843	5.50649	0.0220063	0.238726	42.8946	34.3959	41.7022	55.3277	55.6172	45.2912
ENSMUSG00000035199	Arl6ip5	TRUE	-0.204484	0.867849	5.45324	0.0220703	0.238726	40.1533	40.4498	41.7022	49.378	45.8193	45.741
ENSMUSG00000021693	Kif2a	TRUE	-0.161341	0.894194	6.89187	0.0220472	0.238726	109.672	115.205	111.859	119.182	128.724	128.64
ENSMUSG00000002741	Ykt6	TRUE	0.164896	1.12109	7.36807	0.022056	0.238726	170.77	174.768	170.579	149.559	152.665	158.114
ENSMUSG00000028245	Nsmaf	TRUE	0.198412	1.14743	6.10384	0.0220298	0.238726	79.222	71.7394	69.7397	60.7536	65.6145	65.9844
ENSMUSG00000034839	Larp6	TRUE	-0.634368	0.644223	0.266564	0.0220887	0.238785	0.986084	0.725557	1.16649	1.73881	1.28569	1.45752
ENSMUSG00000021998	Lcp1	TRUE	-0.265346	0.831999	5.30079	0.0221131	0.238909	36.1301	36.0964	35.7031	46.4241	43.1593	40.1629
ENSMUSG00000048562	Sp8	TRUE	-0.383657	0.766492	5.73884	0.0221479	0.238935	31.4561	50.6529	52.6589	45.9213	72.0873	57.7971
ENSMUSG00000041642	Kif21b	TRUE	-0.365147	0.77639	6.93686	0.0221543	0.238935	110.875	93.8689	109.13	149.894	142.778	111.653
ENSMUSG00000031383	Dusp9	TRUE	0.62022	1.53711	4.46927	0.0221361	0.238935	32.028	24.941	21.8093	15.5655	15.0514	20.6213
ENSMUSG00000044338	Aplnr	TRUE	-0.254618	0.838209	5.78264	0.0221932	0.239012	56.3251	49.7686	50.7842	75.2088	53.0236	58.9487
ENSMUSG00000038685	Rtel1	TRUE	0.173594	1.12786	6.54417	0.0221757	0.239012	99.6931	94.7758	98.9438	84.3637	90.752	85.0762
ENSMUSG00000070167	Gm25822	FALSE	0.609232	1.52545	0.913764	0.0222002	0.239012	1.85384	2.63014	2.18718	1.27792	1.70686	1.38555
ENSMUSG00000004931	Apba3	TRUE	0.26837	1.20445	4.23035	0.0222282	0.239034	20.4514	20.3609	19.4346	18.1423	15.7386	16.1407
ENSMUSG00000017817	Jph2	TRUE	0.645707	1.56451	0.667115	0.022223	0.239034	2.38632	1.90459	1.74974	1.59216	1.06402	1.20561
ENSMUSG00000095747	Gm22475	FALSE	-1.26257	0.416801	-2.80909	0.0223572	0.239869	0.0394434	0.136042	0.0624908	0.230445	0.177337	0.161947
ENSMUSG00000027210	Meis2	TRUE	-0.681836	0.623371	7.20634	0.0223647	0.239869	98.6873	104.299	128.064	172.708	206.752	151.618
ENSMUSG00000029461	Fam168a	TRUE	-0.232206	0.851332	7.247	0.0223687	0.239869	140.103	131.847	140.646	173.609	168.47	142.639
ENSMUSG00000026641	Usf1	TRUE	0.15422	1.11282	6.47207	0.0223433	0.239869	90.0886	93.098	90.9033	84.1961	78.9148	83.1508
ENSMUSG00000022570	Tsta3	TRUE	0.210334	1.15696	5.29616	0.0223708	0.239869	41.0605	40.7445	43.1811	36.3474	35.0905	36.582
ENSMUSG00000097342	RP23-161F5.4	FALSE	-1.24676	0.421394	-2.24377	0.0225074	0.240002	0.11833	0.0680209	0.124982	0.377091	0.221671	0.161947
ENSMUSG00000083477	Gm5555	FALSE	-0.647676	0.638308	-0.528388	0.0224481	0.240002	0.532485	0.566841	0.520757	0.796082	0.820182	0.9177
ENSMUSG00000006574	Slc4a1	TRUE	-0.501679	0.706284	6.99714	0.0224354	0.240002	91.8833	75.3672	135.23	156.283	120.988	151.007
ENSMUSG00000041773	Enc1	TRUE	-0.24378	0.844529	7.36222	0.022475	0.240002	133.674	153.296	158.018	186.388	179.265	161.263
ENSMUSG00000048170	Mcmbp	TRUE	0.182267	1.13467	7.21965	0.0224678	0.240002	154.263	159.35	152.54	128.002	141.515	141.29
ENSMUSG00000002550	Uck1	TRUE	0.209798	1.15653	5.53664	0.0224331	0.240002	48.2787	50.5169	48.7428	41.7105	40.3884	45.4172
ENSMUSG00000020328	Nudcd2	TRUE	0.211751	1.15809	6.8126	0.0224926	0.240002	112.512	126.383	118.253	92.9739	103.52	111.833
ENSMUSG00000024790	Sac3d1	TRUE	0.268618	1.20465	4.34695	0.0224552	0.240002	20.333	24.3968	21.7051	19.4202	16.7361	18.9478
ENSMUSG00000093565	2610019E17Rik	FALSE	0.367286	1.28992	3.28312	0.0224223	0.240002	10.2947	12.0851	10.3735	8.5055	7.15996	9.68084
ENSMUSG00000016356	Col20a1	TRUE	0.667371	1.58818	0.233107	0.0225132	0.240002	1.51857	1.45111	1.3748	0.87988	0.820182	1.02566
ENSMUSG00000047749	Zc3hav1l	TRUE	0.169194	1.12443	6.82905	0.0225333	0.240077	132.175	113.935	116.504	106.13	108.419	107.983
ENSMUSG00000032633	Flcn	TRUE	0.219119	1.16402	5.29441	0.0225802	0.240326	43.2299	39.4068	38.8693	33.5192	35.024	35.8443
ENSMUSG00000065990	Aurkaip1	TRUE	0.234929	1.17685	5.42645	0.0226087	0.240326	43.4271	48.7483	42.5562	37.8139	35.9107	40.7027
ENSMUSG00000058838	Rps27a-ps2	FALSE	0.481626	1.39632	1.71592	0.0226027	0.240326	4.12183	3.74115	4.04107	2.68154	2.57138	3.25694
ENSMUSG00000020000	Moxd1	TRUE	1.10911	2.15713	0.520753	0.0225931	0.240326	2.52437	2.42608	1.16649	0.85893	0.576344	1.38555
ENSMUSG00000018593	Sparc	TRUE	-0.231842	0.851547	7.84814	0.0226392	0.240512	217.984	203.179	216.01	294.404	223.754	230.127
ENSMUSG00000028998	Tomm7	TRUE	0.211323	1.15775	6.32437	0.0227028	0.240871	82.7127	88.6086	85.1333	74.2241	75.6562	71.6346
ENSMUSG00000004233	Wars2	TRUE	0.272966	1.20829	4.24488	0.0227009	0.240871	22.3447	19.4767	19.2472	16.0264	17.379	17.1484
ENSMUSG00000004661	Arid3b	TRUE	0.2973	1.22884	5.3833	0.0227121	0.240871	50.6847	44.6898	43.7852	35.8865	35.4451	41.8903
ENSMUSG00000028669	Pithd1	TRUE	0.245471	1.18548	5.33406	0.0227476	0.241038	41.3564	43.5787	43.5353	32.5346	35.6225	40.1629
ENSMUSG00000029027	Dffb	TRUE	0.322773	1.25073	3.51826	0.0227539	0.241038	13.0952	11.9037	11.4983	9.44823	9.82001	9.91476
ENSMUSG00000028776	Tinagl1	TRUE	-0.661824	0.632079	2.45595	0.022814	0.241121	3.21463	3.71848	5.8533	7.77227	6.47278	5.99204
ENSMUSG00000042284	Itga1	TRUE	-0.438032	0.738141	3.52221	0.022804	0.241121	10.768	7.79973	10.9775	14.3295	13.8988	11.8401
ENSMUSG00000020340	Cyfip2	TRUE	-0.421165	0.746822	6.86136	0.0228067	0.241121	91.6269	88.9714	102.943	127.31	132.781	119.589
ENSMUSG00000040151	Hs2st1	TRUE	-0.162834	0.893269	6.78988	0.0227906	0.241121	103.065	104.208	105.13	121.8	119.015	108.972
ENSMUSG00000038855	Itpkb	TRUE	-0.231633	0.85167	4.93492	0.0228618	0.24135	28.1034	28.9769	28.2042	34.9228	31.5659	33.631
ENSMUSG00000030519	Apba2	TRUE	-0.224279	0.856023	6.0396	0.0228529	0.24135	64.056	59.4276	57.2832	72.7158	71.0676	67.424
ENSMUSG00000022637	Cblb	TRUE	-0.166256	0.891152	6.86085	0.0229517	0.242097	110.777	110.806	110.567	133.029	119.104	120.597
ENSMUSG00000001039	B9d1	TRUE	0.247119	1.18683	4.35295	0.0229588	0.242097	20.0372	20.8598	22.1009	18.0166	17.0908	17.9581
ENSMUSG00000026274	Pask	TRUE	0.167421	1.12305	6.3338	0.0230127	0.242418	87.3867	86.5906	80.509	75.7325	74.2154	76.6369
ENSMUSG00000087362	Gm13710	FALSE	1.58522	3.00055	-2.63051	0.0230155	0.242418	0.11833	0.226736	0.208303	0.041899	0.0221671	0.107965
ENSMUSG00000051839	Gypa	TRUE	-0.532965	0.691133	4.44427	0.0230428	0.242567	14.7518	15.4181	24.913	25.4537	21.7681	32.4614
ENSMUSG00000042269	Fam92b	TRUE	0.624937	1.54214	-0.133259	0.0230765	0.242636	1.10441	1.04299	1.16649	0.712283	0.576344	0.845724
ENSMUSG00000000982	Ccl3	TRUE	1.10941	2.15758	-1.90448	0.023078	0.242636	0.493042	0.181389	0.291624	0.146647	0.199504	0.107965
ENSMUSG00000003476	Crhr2	TRUE	1.30029	2.46278	-2.17951	0.0230888	0.242636	0.157773	0.294757	0.249963	0.0209495	0.0886683	0.161947
ENSMUSG00000015484	Fam163a	TRUE	-0.654886	0.635126	2.24961	0.0231489	0.243129	3.80628	4.23997	4.31186	9.05019	5.03193	5.38024
ENSMUSG00000070424	Art5	TRUE	0.61431	1.53083	0.481652	0.0231743	0.243258	1.41996	2.04063	1.35397	0.85893	1.19702	1.07965
ENSMUSG00000038349	Plcl1	TRUE	-0.502728	0.705771	2.59002	0.0232013	0.243313	5.22624	4.73879	4.62432	8.17031	6.36195	6.15399
ENSMUSG00000029106	Add1	TRUE	-0.180081	0.882653	8.15161	0.0232059	0.243313	265.04	260.588	266.252	320.988	284.226	291.955
ENSMUSG00000030782	Tgfb1i1	TRUE	-0.397662	0.759087	4.35186	0.0232396	0.243527	17.6115	16.5518	20.372	30.5653	21.6572	19.6496
ENSMUSG00000007603	Dus3l	TRUE	0.217986	1.16311	5.54837	0.0233064	0.244089	50.9016	47.6373	47.5972	41.2705	43.2258	41.1705
ENSMUSG00000039488	Cntn5	TRUE	-0.888309	0.540247	-0.261947	0.0233348	0.244236	0.729702	0.544167	0.499926	1.17317	1.28569	0.845724
ENSMUSG00000057182	Scn3a	TRUE	-0.562534	0.677112	4.76057	0.0233601	0.244236	21.043	19.0912	25.3088	34.9228	34.1816	27.567
ENSMUSG00000019978	Epb4.1l2	TRUE	-0.213044	0.862715	6.67418	0.0233501	0.244236	104.545	93.7328	96.1108	133.365	98.0893	109.8
ENSMUSG00000046178	Nxph1	TRUE	-1.34609	0.393355	0.236199	0.0233894	0.244266	0.650815	0.317431	0.74989	2.074	1.72903	0.593806
ENSMUSG00000046753	Ccdc66	TRUE	-0.236097	0.849039	5.29644	0.0233864	0.244266	38.2403	36.8447	35.953	41.6895	47.4375	41.6924
ENSMUSG00000042032	Mat2b	TRUE	0.176114	1.12984	6.161	0.0234237	0.244486	73.6407	74.823	72.7601	62.8276	65.5037	67.442
ENSMUSG00000019464	Ptger1	TRUE	-0.264146	0.832691	4.12911	0.0234713	0.244845	15.5604	16.3704	16.2059	20.3839	18.709	18.7139
ENSMUSG00000041012	Cmtm8	TRUE	-0.383574	0.766536	2.74601	0.0234987	0.244854	5.16708	6.7114	6.35323	7.77227	7.44814	8.52921
ENSMUSG00000013367	Iglon5	TRUE	-0.294843	0.815161	5.17299	0.0234916	0.244854	31.1405	30.8362	35.2656	38.9451	42.6938	37.6797
ENSMUSG00000064225	Paqr9	TRUE	-0.613025	0.653824	-0.148287	0.0235371	0.244976	0.59165	0.816251	0.74989	1.08937	1.08619	1.11564
ENSMUSG00000096768	Erdr1	TRUE	0.493045	1.40741	4.6892	0.0235285	0.244976	33.5466	29.0676	27.1418	16.1102	23.5636	24.0941
ENSMUSG00000024425	Ndfip1	TRUE	0.177883	1.13122	6.23168	0.0235528	0.245002	74.3507	81.8519	79.5716	68.6935	67.1662	72.4983
ENSMUSG00000056031	9330154J02Rik	TRUE	-0.898835	0.53632	-0.35659	0.0235978	0.2452	0.512764	0.589515	0.562417	1.59216	0.820182	0.701771
ENSMUSG00000031479	Vps36	TRUE	0.159622	1.11699	6.59538	0.0235984	0.2452	101.074	103.845	101.131	89.7058	91.7052	92.5617
ENSMUSG00000041329	Atp1b2	TRUE	-0.469619	0.722155	3.39146	0.0236142	0.245226	7.29702	10.5206	11.7483	13.701	10.4407	16.7525
ENSMUSG00000026975	Wdr85	TRUE	0.224017	1.16798	4.95586	0.0237039	0.246019	33.6452	33.4436	32.6827	28.3866	29.0832	27.9629
ENSMUSG00000094665	Gm24873	FALSE	-1.42499	0.372421	-3.06043	0.0237487	0.246222	0.0394434	0.0680209	0.0624908	0.230445	0.0886683	0.143953
ENSMUSG00000030217	Art4	TRUE	-0.623901	0.648914	0.88471	0.0238167	0.246222	1.47913	1.04299	1.60393	2.3254	1.55169	2.48319
ENSMUSG00000029601	Iqcd	TRUE	-0.591112	0.663831	0.231639	0.0238037	0.246222	0.907197	0.725557	1.04151	1.65501	1.10835	1.27758
ENSMUSG00000039477	Tnrc18	TRUE	-0.309543	0.806897	7.2893	0.0237895	0.246222	141.404	128.219	143.333	197.051	167.982	146.796
ENSMUSG00000015671	Psma2	TRUE	0.173045	1.12744	7.2807	0.0237927	0.246222	160.041	164.973	164.267	143.714	140.384	149.837
ENSMUSG00000027714	Exosc9	TRUE	0.224503	1.16837	5.82512	0.0238035	0.246222	62.3008	62.7606	59.0121	51.3682	52.7798	53.3885
ENSMUSG00000066687	Zbtb16	TRUE	0.802816	1.7445	4.56884	0.0237663	0.246222	34.1777	31.471	23.3716	15.0627	12.3027	23.6443
ENSMUSG00000039153	Runx2	TRUE	-0.861969	0.550201	-0.460643	0.0239057	0.246826	0.611372	0.544167	0.395775	1.40362	0.576344	0.845724
ENSMUSG00000032826	Ank2	TRUE	-0.555483	0.680429	7.00931	0.0239153	0.246826	109.081	90.8533	114.233	155.152	182.457	124.141
ENSMUSG00000023348	Trip6	TRUE	0.1755	1.12936	5.94728	0.0238943	0.246826	63.0108	64.6652	65.782	58.0511	54.531	58.6788
ENSMUSG00000092072	Gm4540	TRUE	-0.261957	0.833956	4.5015	0.0240113	0.2476	20.6289	21.1772	22.6633	26.0821	26.8443	24.4
ENSMUSG00000024985	Tcf7l2	TRUE	0.429727	1.34698	5.3346	0.0240171	0.2476	59.2636	42.4224	43.7644	29.2246	36.9525	41.8003
ENSMUSG00000005667	Mthfd2	TRUE	0.297966	1.22941	5.84228	0.0240609	0.247913	57.1337	69.404	64.2822	44.5387	48.4129	62.1877
ENSMUSG00000097040	AC158956.1	FALSE	-0.621797	0.649861	2.47335	0.0241281	0.248467	3.76684	3.67313	5.56168	7.01809	6.93829	6.06402
ENSMUSG00000004798	Ulk2	TRUE	-0.205254	0.867386	6.25855	0.0241525	0.24858	74.8635	68.9959	69.8855	85.3902	86.0747	75.0355
ENSMUSG00000040850	Psme4	TRUE	-0.18869	0.877402	8.24823	0.0241951	0.24879	287.246	278.455	272.439	301.736	330.334	323.192
ENSMUSG00000047150	1700001C19Rik	TRUE	1.56371	2.95614	-3.00213	0.0241999	0.24879	0.197217	0.0680209	0.166642	0.041899	0.0886683	0.0179941
ENSMUSG00000034275	Igsf9b	TRUE	-0.487202	0.713408	3.28142	0.0243229	0.249436	8.69726	7.07418	9.37362	13.9524	11.1722	10.1487
ENSMUSG00000036972	Zic4	TRUE	-0.416933	0.749015	6.78151	0.0243573	0.249436	84.1327	103.346	115.42	143.316	126.419	134.65
ENSMUSG00000008153	Clstn3	TRUE	-0.289664	0.818093	4.12869	0.0242805	0.249436	15.2646	15.7582	15.9352	19.7554	17.6672	19.9555
ENSMUSG00000022789	Dnm1l	TRUE	-0.159012	0.895638	7.38912	0.0243534	0.249436	160.002	162.842	162.08	175.725	187.489	178.232
ENSMUSG00000025785	Exosc7	TRUE	0.214361	1.16019	5.66227	0.0243454	0.249436	51.6905	56.6388	50.7009	43.8264	46.3957	46.8207
ENSMUSG00000098051	RP23-359C15.10	FALSE	0.35674	1.28053	3.20668	0.0243235	0.249436	9.40724	11.2235	9.54026	6.85049	8.71166	7.98939
ENSMUSG00000027416	Otor	TRUE	1.09184	2.13145	-2.11946	0.0243282	0.249436	0.23666	0.294757	0.249963	0.188546	0.0221671	0.143953
ENSMUSG00000026790	Odf2	TRUE	-0.171604	0.887855	7.56878	0.0243998	0.249728	180.335	173.295	179.911	201.513	205.888	193.581
ENSMUSG00000031976	Urb2	TRUE	0.205713	1.15326	5.91197	0.0244129	0.249728	67.4481	63.849	61.1785	51.5777	55.861	59.4346
ENSMUSG00000048330	Ric3	TRUE	0.229106	1.17211	5.23518	0.024437	0.249837	41.2183	41.4247	40.0774	31.529	37.6175	35.5564
ENSMUSG00000001415	Smg5	TRUE	0.156557	1.11462	7.49059	0.0244587	0.24992	184.22	185.584	187.243	160.976	163.615	175.119
ENSMUSG00000097703	AC055772.1	FALSE	0.869097	1.82652	-1.57254	0.0244954	0.250156	0.374712	0.385452	0.395775	0.146647	0.310339	0.179941
ENSMUSG00000052889	Prkcb	TRUE	-0.43736	0.738485	2.86959	0.0245346	0.250184	5.42346	5.71376	7.20727	7.60467	9.2215	8.02538
ENSMUSG00000031627	Irf2	TRUE	-0.330574	0.79522	3.37854	0.0245143	0.250184	9.60446	9.04678	8.97784	11.8365	12.0811	10.8505
ENSMUSG00000018417	Myo1b	TRUE	-0.229145	0.853141	7.38559	0.0245387	0.250184	156.334	148.716	159.664	176.5	201.632	166.644
ENSMUSG00000023951	Vegfa	TRUE	-0.202013	0.869336	6.54844	0.0245744	0.250409	86.026	87.0668	91.4657	108.686	107.998	87.7213
ENSMUSG00000085355	3010003L21Rik	FALSE	-0.568313	0.674405	0.721502	0.0246033	0.250565	1.22274	1.47379	1.16649	2.47204	1.6182	1.63746
ENSMUSG00000029165	Agbl5	TRUE	-0.223064	0.856744	5.78178	0.0246311	0.25071	53.2485	46.9571	51.5757	61.8849	58.3881	56.9334
ENSMUSG00000026678	Rgs5	TRUE	-0.801636	0.573698	0.756554	0.0246708	0.250976	1.61718	1.26972	0.937362	3.20528	2.06154	1.42154
ENSMUSG00000025381	Cnpy2	TRUE	0.198189	1.14726	5.827	0.0247176	0.251314	57.114	60.0625	60.8244	52.0805	48.169	54.8461
ENSMUSG00000096982	AC147219.1	FALSE	-0.621424	0.650029	0.911832	0.0247563	0.251568	1.67634	0.99764	1.52061	1.84356	1.97287	2.64514
ENSMUSG00000052305	Hbb-b1	TRUE	-0.993794	0.502155	3.19402	0.0248002	0.251876	3.94434	4.44403	8.37377	16.1521	8.80033	8.43924
ENSMUSG00000033730	Egr3	TRUE	-1.43132	0.370791	-2.2466	0.0248799	0.252052	0.0788867	0.0226736	0.145812	0.272344	0.199504	0.215929
ENSMUSG00000087543	Gm16576	FALSE	-0.44063	0.736813	1.80805	0.0248925	0.252052	3.2738	2.76618	2.87458	4.06421	4.16741	3.88673
ENSMUSG00000037108	Zcwpw1	TRUE	-0.328364	0.796439	3.21313	0.0248438	0.252052	8.87475	8.97876	8.74871	10.5376	11.5269	11.3363
ENSMUSG00000032180	Tmed1	TRUE	0.267327	1.20358	4.84256	0.0248552	0.252052	29.1881	30.4507	29.2874	25.4746	23.2533	25.1378
ENSMUSG00000015619	Gata3	TRUE	1.16502	2.24236	0.634805	0.0248619	0.252052	3.33296	1.94993	1.18733	1.36172	0.620678	0.899706
ENSMUSG00000041193	Pla2g5	TRUE	2.05475	4.15471	-2.45862	0.0248994	0.252052	1.06497	0.0680209	0.0624908	0.167596	0.0443341	0.0719765
ENSMUSG00000097134	AC153382.1	FALSE	-0.599791	0.65985	1.48297	0.0249167	0.252089	1.6369	1.83657	2.97873	3.51952	3.05906	3.20295
ENSMUSG00000023036	Pcdhgc4	TRUE	-0.186867	0.878511	7.81889	0.0249889	0.252207	206.19	202.748	221.051	261.513	221.227	234.373
ENSMUSG00000026036	Nif3l1	TRUE	0.178754	1.13191	6.06048	0.0249967	0.252207	71.4516	72.1702	67.8442	59.1614	63.3092	64.329
ENSMUSG00000004610	Etfb	TRUE	0.19743	1.14665	5.83855	0.02497	0.252207	55.3587	60.4026	60.9285	50.4045	49.1222	54.5042
ENSMUSG00000025128	Bhlhe22	TRUE	0.731953	1.66089	1.54879	0.0249484	0.252207	5.69956	3.3557	2.12469	2.1578	2.54921	2.03334
ENSMUSG00000091443	Gm17023	FALSE	0.825645	1.77233	-1.34162	0.0249839	0.252207	0.433877	0.430799	0.437436	0.272344	0.288172	0.179941
ENSMUSG00000021469	Msx2	TRUE	-0.7003	0.615444	3.49669	0.0250727	0.252836	8.007	8.79737	9.2903	23.8824	7.38163	11.1384
ENSMUSG00000078851	Hist3h2a	TRUE	-0.691638	0.61915	1.715	0.0251155	0.253129	2.66243	2.81153	2.70793	4.60889	5.27576	3.34691
ENSMUSG00000026571	Dcaf6	TRUE	-0.264543	0.832462	4.34751	0.0251578	0.253417	19.0511	18.479	18.3931	23.1702	22.3222	21.7009
ENSMUSG00000080186	Gm14448	FALSE	-1.33918	0.395245	-2.79568	0.0252566	0.253743	0.0788867	0.0453473	0.0624908	0.209495	0.177337	0.107965
ENSMUSG00000026167	Wnt10a	TRUE	-0.844099	0.557059	-1.09384	0.0252476	0.253743	0.335269	0.317431	0.374945	0.712283	0.642845	0.503835
ENSMUSG00000032899	Styk1	TRUE	-0.750193	0.594524	0.0133536	0.0252588	0.253743	0.690259	0.521494	0.833211	1.36172	1.35219	0.755753
ENSMUSG00000028639	Ybx1	TRUE	-0.235502	0.849389	10.0984	0.0252441	0.253743	993.696	1056.18	995.832	1138.19	1215.75	1231.81
ENSMUSG00000031540	Kat6a	TRUE	-0.188913	0.877267	7.96671	0.0252269	0.253743	255.632	224.492	234.653	271.317	287.241	256.308
ENSMUSG00000026840	Lamc3	TRUE	-0.409407	0.752933	4.77557	0.0253317	0.253784	27.847	20.5196	24.4547	42.9256	24.6498	29.1685
ENSMUSG00000024902	Mrpl11	TRUE	0.169351	1.12455	6.06346	0.0253047	0.253784	68.0003	71.3313	70.5521	62.0106	60.1393	64.4369
ENSMUSG00000029036	Atad3a	TRUE	0.194856	1.14461	6.37352	0.0253276	0.253784	88.925	87.1348	80.9881	72.2339	77.6734	74.6756
ENSMUSG00000021477	Ctsl	TRUE	0.23101	1.17366	6.5755	0.0253296	0.253784	99.8114	107.45	101.235	85.9559	83.459	93.3895
ENSMUSG00000017720	Trp53tg5	TRUE	1.09968	2.14307	-1.33084	0.0252835	0.253784	0.631094	0.476147	0.416605	0.0628485	0.37684	0.269912
ENSMUSG00000008658	Rbfox1	TRUE	-0.862661	0.549937	0.814064	0.0254377	0.254432	0.82831	0.861598	1.62476	2.43014	1.97287	1.63746
ENSMUSG00000053716	Dusp7	TRUE	-0.197991	0.871764	5.7324	0.0254191	0.254432	48.4167	52.943	52.0548	60.4603	56.0827	59.3986
ENSMUSG00000029388	Eif2b1	TRUE	0.199798	1.14854	5.73825	0.0254337	0.254432	57.4098	56.7521	53.2213	48.4353	46.8169	50.4555
ENSMUSG00000036560	Lgi4	TRUE	0.639373	1.55765	-0.253464	0.0255257	0.255174	0.986084	0.929619	0.937362	0.502788	0.598511	0.719765
ENSMUSG00000052914	Cyp2j6	TRUE	-0.403008	0.75628	2.41031	0.0257058	0.255867	4.83181	4.30799	4.37436	5.80302	6.71662	5.38024
ENSMUSG00000036273	Lrrk2	TRUE	-0.390201	0.763023	3.65449	0.0256657	0.255867	11.0244	9.59095	12.644	18.4775	12.5244	12.6139
ENSMUSG00000042686	Jph1	TRUE	-0.324497	0.798577	4.42079	0.0256885	0.255867	15.3435	20.497	21.0386	21.5361	27.1547	22.5286
ENSMUSG00000028099	Polr3c	TRUE	0.173117	1.12749	5.88026	0.0256139	0.255867	63.1488	61.0601	60.5327	51.5358	54.9078	57.3832
ENSMUSG00000029647	Pan3	TRUE	0.174533	1.1286	6.24708	0.0256875	0.255867	77.7823	80.7182	85.4457	69.9085	76.9641	69.3133
ENSMUSG00000050332	Amer1	TRUE	0.182778	1.13507	5.98308	0.0256692	0.255867	72.2405	64.5065	66.9068	56.2913	59.8733	63.2493
ENSMUSG00000083282	Ctsf	TRUE	0.363433	1.28648	3.13199	0.0256365	0.255867	11.833	9.6363	9.18615	8.56835	6.73879	8.51122
ENSMUSG00000015053	Gata2	TRUE	0.657047	1.57685	1.74922	0.025694	0.255867	6.80398	3.7865	2.81209	2.63964	2.52705	3.32891
ENSMUSG00000061601	Pclo	TRUE	-0.358427	0.780015	4.39407	0.0257203	0.255872	19.7808	17.6401	20.4761	24.6157	28.3517	21.305
ENSMUSG00000001285	Myg1	TRUE	0.193732	1.14372	5.55662	0.0257668	0.256198	47.8645	49.9274	49.0344	42.0876	41.6963	44.5534
ENSMUSG00000083716	Gm13436	FALSE	-0.371633	0.772907	3.10475	0.025847	0.256817	7.11953	7.68636	7.33225	10.0767	8.68949	9.86078
ENSMUSG00000092373	Gm20535	FALSE	0.720913	1.64822	-0.963063	0.025857	0.256817	0.670537	0.49882	0.499926	0.293293	0.421174	0.3059
ENSMUSG00000051316	Taf7	TRUE	0.233155	1.1754	5.3497	0.0258833	0.25694	44.3343	45.9821	44.2018	34.9647	38.6372	40.8107
ENSMUSG00000001794	Capns1	TRUE	-0.154702	0.898318	6.62801	0.0259055	0.257022	90.9564	91.3748	94.2569	106.968	97.6016	103.304
ENSMUSG00000090576	Gm17055	FALSE	-0.70236	0.614566	-0.397778	0.0259595	0.25742	0.59165	0.476147	0.583247	1.08937	0.975351	0.647788
ENSMUSG00000045875	Adra1a	TRUE	-0.742914	0.597531	0.00891246	0.0259865	0.25755	0.650815	0.838925	0.74989	1.50836	0.842349	1.38555
ENSMUSG00000069769	Msi2	TRUE	-0.219303	0.85898	8.04874	0.0260036	0.257581	252.359	245.306	264.649	267.148	338.403	281.968
ENSMUSG00000056481	Cd248	TRUE	-0.395009	0.760485	4.23429	0.0261273	0.257935	17.5128	15.5768	17.6849	28.0514	19.2854	19.4516
ENSMUSG00000035829	Ppp1r26	TRUE	-0.243865	0.84448	5.14758	0.0261371	0.257935	32.2252	31.8338	33.995	39.9926	39.8564	36.2941
ENSMUSG00000032601	Prkar2a	TRUE	-0.163524	0.892842	6.9357	0.0261058	0.257935	113.597	123.118	119.087	126.64	138.034	133.804
ENSMUSG00000053950	Adnp2	TRUE	0.165062	1.12121	6.02154	0.0261294	0.257935	69.8542	71.0138	65.4487	60.3137	61.8018	61.8818
ENSMUSG00000063694	Cycs	TRUE	0.2067	1.15405	6.59209	0.0261213	0.257935	97.6815	108.176	102.339	80.5509	89.9983	96.4485
ENSMUSG00000083043	Gm13433	FALSE	0.903609	1.87074	-2.01184	0.0260691	0.257935	0.295825	0.340105	0.354114	0.125697	0.199504	0.197935
ENSMUSG00000045518	Onecut3	TRUE	1.29314	2.4506	-0.3122	0.0261313	0.257935	1.08469	1.40577	1.5831	0.146647	1.08619	0.431859
ENSMUSG00000038429	Usp5	TRUE	0.173757	1.12799	7.65741	0.0261554	0.257977	215.479	205.287	200.304	184.879	180.994	184.728
ENSMUSG00000020516	Rps6kb1	TRUE	-0.155703	0.897695	6.88247	0.0261935	0.258077	110.836	115.159	112.088	119.538	132.182	124.897
ENSMUSG00000032135	Mcam	TRUE	0.274772	1.2098	4.90403	0.0261811	0.258077	32.876	31.335	33.2659	28.0304	27.7753	24.7959
ENSMUSG00000019769	Syne1	TRUE	-0.410389	0.752421	2.81875	0.0262508	0.258284	5.93622	5.16959	6.16576	9.19684	7.18213	6.60384
ENSMUSG00000021012	Zc3h14	TRUE	-0.150971	0.900644	7.19302	0.026239	0.258284	136.947	143.048	138.125	153.476	154.261	156.477
ENSMUSG00000059406	Tmprss9	TRUE	1.01355	2.01887	-2.00874	0.0262565	0.258284	0.374712	0.272084	0.249963	0.0837981	0.155169	0.197935
ENSMUSG00000072949	Acot1	TRUE	0.352568	1.27683	3.35129	0.026291	0.258486	12.543	10.2031	10.311	8.00271	8.82249	9.06904
ENSMUSG00000048349	Pou4f1	TRUE	0.609466	1.52569	0.677325	0.0263142	0.258577	2.6427	1.79122	1.49978	1.36172	1.06402	1.45752
ENSMUSG00000037573	Tob1	TRUE	-0.243307	0.844806	4.85915	0.0263951	0.259234	25.4607	29.4304	27.4126	32.7022	32.2309	32.4614
ENSMUSG00000046179	E2f8	TRUE	-0.191309	0.875811	5.69734	0.0264121	0.259262	50.5861	46.8664	47.7846	55.9771	57.0802	52.8307
ENSMUSG00000057157	Gm6054	FALSE	-1.28835	0.409419	-2.35001	0.0264474	0.259395	0.059165	0.0680209	0.0833211	0.167596	0.155169	0.197935
ENSMUSG00000016181	Diexf	TRUE	0.217775	1.16294	5.40007	0.0264536	0.259395	45.5965	45.8461	42.7229	37.8348	38.8589	38.6694
ENSMUSG00000089994	Gm16239	FALSE	-0.841808	0.557944	-1.04256	0.0265118	0.259689	0.35499	0.272084	0.416605	0.775132	0.687179	0.431859
ENSMUSG00000034297	Med13	TRUE	-0.193539	0.874458	7.19473	0.0265084	0.259689	148.09	134.137	144.02	153.853	176.317	157.341
ENSMUSG00000074629	4930518I15Rik	TRUE	-0.463205	0.725373	1.7056	0.0265362	0.25979	2.66243	2.9249	2.64544	3.35192	4.49992	3.50885
ENSMUSG00000058441	Panx2	TRUE	-0.465089	0.724427	1.99352	0.0266012	0.259867	3.13575	3.33303	3.24952	4.86029	4.47775	4.08466
ENSMUSG00000021131	Erh	TRUE	0.187823	1.13904	7.63673	0.0266144	0.259867	200.096	212.792	213.51	181.758	182.435	185.717
ENSMUSG00000027342	Pcna	TRUE	0.204808	1.15253	8.87293	0.0265892	0.259867	480.657	507.572	485.783	396.805	417.206	464.86
ENSMUSG00000019996	Map7	TRUE	0.543583	1.45759	3.80573	0.0265984	0.259867	24.0013	15.3501	10.436	11.1451	10.3964	12.6139
ENSMUSG00000004098	Col5a3	TRUE	0.617479	1.53419	0.675522	0.0265851	0.259867	2.20883	2.13132	1.64559	1.29887	1.15269	1.43953
ENSMUSG00000029629	Phf14	TRUE	-0.149978	0.901265	7.07609	0.0266404	0.259983	132.392	126.383	125.419	136.591	146.103	143.611
ENSMUSG00000039617	Gm7488	FALSE	0.575585	1.49028	0.00453692	0.0267211	0.260633	1.04525	1.22438	1.29148	0.607536	0.931017	0.845724
ENSMUSG00000000416	Cttnbp2	TRUE	-0.375691	0.770736	3.57458	0.0267961	0.260837	10.2553	8.79737	11.3317	15.1255	11.682	12.6319
ENSMUSG00000033685	Ucp2	TRUE	-0.270691	0.828923	5.28799	0.0268247	0.260837	34.5327	33.1715	39.5358	44.7901	37.9722	46.5868
ENSMUSG00000052713	Zfp608	TRUE	-0.213326	0.862547	6.1536	0.0268347	0.260837	73.5224	62.874	67.6359	80.2157	79.3138	77.0688
ENSMUSG00000026917	Wdr5	TRUE	0.171139	1.12595	7.25043	0.0268016	0.260837	158.069	162.162	159.414	135.627	142.091	148.236
ENSMUSG00000042389	Tsen2	TRUE	0.245139	1.18521	4.42542	0.0267991	0.260837	22.0686	24.3515	22.8716	19.6087	18.9085	19.9195
ENSMUSG00000039450	Dcxr	TRUE	0.436882	1.35368	2.16036	0.0268409	0.260837	4.43738	5.46435	4.49934	3.93851	3.45806	3.23894
ENSMUSG00000084603	Gm22204	FALSE	1.03786	2.05319	-1.44728	0.0267583	0.260837	0.374712	0.385452	0.395775	0.125697	0.155169	0.269912
ENSMUSG00000004530	Coro1c	TRUE	-0.15866	0.895857	7.69924	0.0268713	0.260932	201.358	196.921	191.451	220.934	217.703	219.654
ENSMUSG00000053747	Sox14	TRUE	1.96555	3.9056	-2.80222	0.0268789	0.260932	0.295825	0.0680209	0.0416605	0.0209495	0.0221671	0.0539824
ENSMUSG00000039771	Polr2j	TRUE	-0.226062	0.854965	5.18103	0.026927	0.261261	34.3354	34.3732	31.7453	40.9772	39.3244	37.2118
ENSMUSG00000053293	Pom121	TRUE	-0.177464	0.884256	7.35634	0.0270135	0.261963	156.906	146.358	153.832	171.074	176.428	169.469
ENSMUSG00000055817	Mta3	TRUE	-0.228339	0.853617	4.89888	0.0271262	0.262885	28.0639	27.0723	29.3082	34.8181	32.2974	31.8316
ENSMUSG00000069565	Dazap1	TRUE	-0.146112	0.903683	7.08773	0.0271371	0.262885	128.408	135.747	129.689	145.746	145.704	144.349
ENSMUSG00000045515	Pou3f3	TRUE	-0.432235	0.741113	7.16208	0.0271861	0.263166	98.4309	129.149	137.23	152.785	186.115	153.346
ENSMUSG00000071064	Zfp827	TRUE	-0.216942	0.860387	6.03865	0.0272058	0.263166	60.1708	56.8655	65.0529	71.1445	74.437	66.1104
ENSMUSG00000037824	Tspan14	TRUE	0.174955	1.12893	6.54697	0.0272088	0.263166	107.069	97.3153	89.466	87.5271	83.9245	88.837
ENSMUSG00000009035	Tmem184b	TRUE	-0.183943	0.880294	5.93132	0.0272284	0.263217	58.672	57.2963	55.3668	66.6614	61.8461	66.1104
ENSMUSG00000061411	8430427H17Rik	TRUE	-0.320758	0.800649	5.68142	0.0273347	0.263414	49.6986	42.2637	47.3264	60.8374	60.0728	53.1006
ENSMUSG00000022489	Pde1b	TRUE	-0.224931	0.855636	5.19455	0.0273655	0.263414	33.4874	32.6047	31.6203	37.0597	40.6987	36.4741
ENSMUSG00000021737	Psmd6	TRUE	0.162545	1.11926	6.98671	0.0273089	0.263414	128.151	138.921	132.064	116.794	116.909	122.846
ENSMUSG00000014303	Glis2	TRUE	0.175696	1.12951	6.00166	0.0273771	0.263414	67.034	64.7333	66.5319	58.7843	58.2329	58.5529
ENSMUSG00000028932	Psmc2	TRUE	0.178239	1.1315	7.44848	0.0273036	0.263414	181.38	187.171	173.537	158.504	160.224	160.346
ENSMUSG00000047909	Ankrd16	TRUE	0.197918	1.14704	6.06512	0.0272691	0.263414	73.1083	65.3228	67.7192	60.6069	63.952	55.2419
ENSMUSG00000022515	Anks3	TRUE	0.217988	1.16311	5.22254	0.027333	0.263414	40.8239	38.6132	40.8481	36.3265	34.5363	32.5873
ENSMUSG00000037894	H2afz	TRUE	0.221488	1.16594	9.49013	0.0273326	0.263414	727.473	783.669	758.43	613.821	633.158	699.539
ENSMUSG00000023043	Krt18	TRUE	0.884811	1.84652	2.11798	0.0273553	0.263414	10.9061	4.5574	3.39533	4.2318	2.0172	3.95871
ENSMUSG00000027665	Pik3ca	TRUE	-0.157409	0.896634	6.50053	0.0274053	0.263548	88.3926	85.5703	87.9037	95.8859	100.572	95.6387
ENSMUSG00000040125	Gpr26	TRUE	-1.30134	0.405749	-1.03122	0.0274247	0.263596	0.335269	0.0680209	0.395775	0.942728	0.75368	0.3059
ENSMUSG00000014769	Psmb1	TRUE	0.175199	1.12912	7.23615	0.0275102	0.264281	153.435	163.023	159.185	141.765	136.793	142.657
ENSMUSG00000021745	Ptprg	TRUE	-0.149603	0.901498	7.06124	0.0275336	0.264283	131.642	123.73	124.69	139.691	143.066	138.879
ENSMUSG00000017897	Eya2	TRUE	0.494342	1.40868	3.75382	0.027539	0.264283	20.3725	15.2594	13.3522	11.3756	10.5072	12.8838
ENSMUSG00000029551	Psmg3	TRUE	0.342297	1.26777	3.32474	0.0275873	0.264609	10.6891	10.7246	10.6443	8.84069	8.44565	8.00738
ENSMUSG00000058806	Col13a1	TRUE	0.752169	1.68432	2.17938	0.0276271	0.264853	6.62648	5.26029	5.76998	3.20528	2.32754	4.93039
ENSMUSG00000007039	Ddah2	TRUE	0.160946	1.11802	7.68141	0.0277005	0.265281	210.923	212.293	217.072	199.879	183.189	189.622
ENSMUSG00000030225	Dera	TRUE	0.268751	1.20476	4.71472	0.0276891	0.265281	28.4387	28.9316	26.4753	21.2428	22.7656	25.5516
ENSMUSG00000037885	Stk35	TRUE	0.14981	1.10942	6.31994	0.0277194	0.265324	84.5665	81.7612	84.2584	74.0146	73.6612	78.1664
ENSMUSG00000003437	Paf1	TRUE	-0.163895	0.892612	6.32827	0.0277458	0.265439	78.4331	76.5689	74.1974	83.0439	88.0033	85.742
ENSMUSG00000027255	Arfgap2	TRUE	0.17467	1.12871	5.89369	0.027813	0.265827	64.3321	62.942	61.9075	55.181	57.058	55.3859
ENSMUSG00000084304	Gm6142	FALSE	0.906905	1.87502	-1.71112	0.0278151	0.265827	0.394434	0.362778	0.312454	0.125697	0.266005	0.179941
ENSMUSG00000078234	Klhdc7a	TRUE	-0.622476	0.649555	1.04665	0.0278435	0.265961	1.30163	1.7232	2.04137	3.43572	1.8177	2.53717
ENSMUSG00000009555	Cdk9	TRUE	0.179255	1.1323	6.55232	0.0278656	0.266035	94.8218	98.3583	98.3605	82.2059	83.459	91.752
ENSMUSG00000021125	Arg2	TRUE	-0.561508	0.677594	0.12749	0.0278911	0.26614	0.788867	0.838925	0.895701	1.13127	1.21919	1.36755
ENSMUSG00000040373	Cacng5	TRUE	0.61769	1.53442	0.434642	0.0279133	0.266215	1.28191	1.85924	1.56227	1.02653	1.04185	0.989676
ENSMUSG00000075389	2810410L24Rik	FALSE	0.2754	1.21033	4.02623	0.0280109	0.267008	18.1242	17.9575	17.5391	15.6912	15.3618	13.2797
ENSMUSG00000010048	Ifrd2	TRUE	0.249622	1.1889	4.95113	0.0280698	0.267431	32.028	33.8064	32.6202	27.3601	26.6892	28.7366
ENSMUSG00000017781	Pitpna	TRUE	-0.146493	0.903444	6.73317	0.0281052	0.26763	101.409	101.192	100.11	115.118	110.303	109.656
ENSMUSG00000037989	Wnk2	TRUE	-0.236927	0.848551	6.01153	0.0281247	0.267677	59.7172	55.7091	62.22	70.8094	73.6168	64.9768
ENSMUSG00000030560	Ctsc	TRUE	-0.274309	0.826846	4.24663	0.0281484	0.267765	17.217	17.5721	17.5183	23.8405	18.1327	21.269
ENSMUSG00000023885	Thbs2	TRUE	-0.902127	0.535097	2.042	0.0282296	0.268211	3.37241	2.13132	3.45782	10.0139	3.19206	3.56284
ENSMUSG00000066720	Cldn9	TRUE	-0.671198	0.627985	0.817043	0.0282178	0.268211	0.867754	1.54181	1.66642	2.63964	1.7512	2.08732
ENSMUSG00000061859	Inadl	TRUE	-0.342871	0.78847	4.32932	0.0282389	0.268211	17.6509	15.1913	19.7054	28.3237	18.8642	19.4876
ENSMUSG00000061887	Ssbp3	TRUE	-0.160999	0.894406	8.20868	0.0282672	0.268343	283.854	280.858	277.834	313.153	308.011	320.835
ENSMUSG00000081404	Gm15694	FALSE	0.88287	1.84404	-1.40416	0.0283056	0.268569	0.414155	0.408126	0.374945	0.104748	0.288172	0.251918
ENSMUSG00000049897	Gm711	TRUE	0.771788	1.70738	-1.03119	0.0283504	0.268856	0.532485	0.385452	0.624908	0.251394	0.266005	0.377876
ENSMUSG00000068428	Gmnc	TRUE	-0.536385	0.689496	4.86669	0.0284245	0.26942	16.7043	25.4172	30.558	48.2886	22.1006	34.9986
ENSMUSG00000035200	Chrnb4	TRUE	-0.404975	0.755249	2.34141	0.0285342	0.270321	4.20072	4.62542	4.35353	6.07536	5.74127	5.63216
ENSMUSG00000029538	Srsf9	TRUE	0.190234	1.14095	6.86326	0.0286121	0.270851	118.685	131.122	119.441	105.544	109.195	108.864
ENSMUSG00000027655	Dhx35	TRUE	0.190527	1.14118	5.36498	0.0286195	0.270851	43.4469	42.2637	43.3269	39.1546	37.0633	36.8699
ENSMUSG00000032667	Pon2	TRUE	-0.216552	0.86062	5.29472	0.0286578	0.271075	36.8795	37.0941	36.8279	41.6057	45.908	41.2605
ENSMUSG00000084098	Gm13422	FALSE	-0.864681	0.549168	-1.42663	0.0287379	0.271136	0.197217	0.24941	0.249963	0.272344	0.509843	0.485841
ENSMUSG00000041120	Nbl1	TRUE	-0.528794	0.693134	2.7865	0.0287066	0.271136	4.02322	5.28296	7.2281	9.13399	8.17965	6.54986
ENSMUSG00000038473	Nos1ap	TRUE	-0.48704	0.713488	2.52698	0.0287155	0.271136	5.79817	4.30799	4.29103	7.43708	7.0713	5.70414
ENSMUSG00000027009	Itga4	TRUE	-0.406472	0.754466	5.49384	0.0287242	0.271136	39.8181	33.0128	41.723	62.5133	48.0804	41.2785
ENSMUSG00000047407	Tgif1	TRUE	-0.253556	0.838826	5.54367	0.0286914	0.271136	40.1731	45.9821	40.744	50.2579	46.9499	54.0183
ENSMUSG00000055980	Irs1	TRUE	-0.196189	0.872853	5.89279	0.0287671	0.271136	60.2892	54.4621	55.8043	70.3694	61.4693	63.5912
ENSMUSG00000021290	2010107E04Rik	TRUE	0.241874	1.18253	6.01374	0.0287602	0.271136	64.3913	70.2883	67.99	56.2285	56.8364	58.3009
ENSMUSG00000086568	9130020K20Rik	FALSE	-0.468154	0.722889	2.06526	0.0287966	0.271276	3.76684	4.17195	3.79111	5.38403	4.83242	5.99204
ENSMUSG00000003423	Pih1d1	TRUE	0.198292	1.14734	5.25988	0.0288257	0.271412	40.4294	39.8829	38.9943	36.117	33.5166	34.3508
ENSMUSG00000085399	9130206I24Rik	FALSE	0.543449	1.45745	3.08301	0.0289025	0.271996	10.0778	10.3165	10.2277	5.80302	7.11563	8.07936
ENSMUSG00000070732	Rbm44	TRUE	-1.14151	0.453286	-1.48392	0.0290159	0.272646	0.256382	0.226736	0.270793	0.796082	0.354673	0.521829
ENSMUSG00000026721	Rabgap1l	TRUE	-0.369555	0.774021	4.30928	0.0290038	0.272646	17.434	15.6221	18.2473	23.254	22.9208	20.1354
ENSMUSG00000071748	Gm14698	TRUE	0.995525	1.99381	-1.16463	0.0289874	0.272646	0.47332	0.49882	0.374945	0.314243	0.199504	0.161947
ENSMUSG00000021520	Uqcrb	TRUE	-0.193768	0.874319	5.48062	0.0290505	0.272749	41.2775	40.6992	43.3686	47.2831	49.6321	46.4788
ENSMUSG00000021532	Fastkd3	TRUE	0.240695	1.18156	4.82434	0.0290564	0.272749	30.7855	30.1333	29.7456	25.4537	25.9133	25.3717
ENSMUSG00000030051	Aplf	TRUE	-0.287523	0.819308	3.8087	0.0291052	0.272904	13.0952	12.2211	12.7481	15.6912	14.6968	16.0687
ENSMUSG00000022999	Lmbr1l	TRUE	0.247709	1.18732	5.04749	0.0291027	0.272904	35.1243	33.8971	34.0783	29.5807	30.4576	26.8292
ENSMUSG00000045503	Sys1	TRUE	0.271856	1.20736	4.19429	0.0291173	0.272904	17.927	20.2702	19.3305	14.539	16.4036	16.6805
ENSMUSG00000029404	Arl6ip4	TRUE	0.203801	1.15173	5.64204	0.0292718	0.273935	51.5327	54.5981	49.6593	41.899	46.9942	46.3528
ENSMUSG00000021384	Susd3	TRUE	0.834058	1.78269	-1.24287	0.0292622	0.273935	0.59165	0.566841	0.354114	0.272344	0.243838	0.323894
ENSMUSG00000001773	Folh1	TRUE	1.1114	2.16055	-1.93375	0.0292588	0.273935	0.47332	0.453473	0.124982	0.188546	0.110835	0.179941
ENSMUSG00000003233	Dvl3	TRUE	-0.214826	0.86165	6.3848	0.0293132	0.274184	84.6849	70.7418	78.2176	95.6764	92.8135	82.7549
ENSMUSG00000038418	Egr1	TRUE	-0.544565	0.685598	2.20353	0.0293321	0.274222	3.53018	2.90223	3.54114	5.04883	5.80777	3.72478
ENSMUSG00000020020	Usp44	TRUE	0.415774	1.33401	3.12549	0.0293558	0.274304	10.3539	10.3619	8.93618	6.24296	7.15996	8.79912
ENSMUSG00000021273	Fdft1	TRUE	-0.153697	0.898944	6.94562	0.0293886	0.274472	117.482	116.724	112.421	131.835	131.628	122.18
ENSMUSG00000003070	Efna2	TRUE	-0.200913	0.87	5.51211	0.0294363	0.274779	42.8355	48.2949	44.4101	51.5568	51.1616	53.0287
ENSMUSG00000002341	Ncan	TRUE	-0.671708	0.627763	6.24182	0.0294825	0.275071	56.3251	53.7365	67.5942	99.1959	105.67	78.1485
ENSMUSG00000033080	Vsx1	TRUE	-1.50763	0.35169	-2.56319	0.029525	0.275328	0.11833	0.0680209	0	0.188546	0.199504	0.161947
ENSMUSG00000020061	Mybpc1	TRUE	-1.19435	0.436983	-1.78829	0.0296413	0.276134	0.216938	0.113368	0.0833211	0.565637	0.0886683	0.3059
ENSMUSG00000091697	Eif3s6-ps2	FALSE	0.681069	1.60333	-0.263902	0.029628	0.276134	0.788867	0.793578	0.458266	0.43994	0.354673	0.467847
ENSMUSG00000063506	Arhgap22	TRUE	1.21343	2.31889	-1.65452	0.0296633	0.276199	0.197217	0.430799	0.479096	0.125697	0.243838	0.107965
ENSMUSG00000047368	Abhd17b	TRUE	0.254335	1.19279	5.38511	0.0297031	0.276431	41.3761	48.4989	44.0977	32.6184	39.7012	39.9649
ENSMUSG00000039431	Mtmr7	TRUE	-0.232169	0.851354	4.70141	0.0297544	0.276629	23.8041	24.0341	23.8507	27.2972	29.4822	27.441
ENSMUSG00000083283	Gm15361	FALSE	1.5145	2.85699	-2.68812	0.0297407	0.276629	0.0788867	0.158716	0.124982	0.041899	0.0221671	0.0539824
ENSMUSG00000040364	Sec1	TRUE	-0.691612	0.619162	-0.437797	0.0297824	0.27675	0.374712	0.74823	0.541587	0.87988	1.08619	0.719765
ENSMUSG00000058076	Sdhc	TRUE	0.173707	1.12795	6.91051	0.0298065	0.276835	123.339	127.222	124.148	111.116	108.308	112.751
ENSMUSG00000060036	Rpl3	TRUE	0.248139	1.18767	10.152	0.0298281	0.276896	1204.74	1273.74	1240.21	971.659	1000.38	1158.98
ENSMUSG00000090191	9230105E05Rik	FALSE	-0.935411	0.522893	-1.58115	0.0299174	0.277168	0.23666	0.158716	0.229133	0.523738	0.443341	0.251918
ENSMUSG00000053024	Cntn2	TRUE	-0.892959	0.538509	4.95263	0.0299054	0.277168	26.0721	16.0529	20.5178	46.9898	44.9105	24.454
ENSMUSG00000074909	Ranbp6	TRUE	0.203284	1.15132	5.66637	0.0298853	0.277168	54.0966	55.6638	56.6583	44.2873	49.9646	50.2756
ENSMUSG00000063652	Slc22a21	TRUE	0.449686	1.36574	1.95389	0.0299075	0.277168	4.25988	4.33067	4.12439	3.35192	3.21423	2.7531
ENSMUSG00000074766	Ism1	TRUE	0.705093	1.63025	-0.135646	0.0299393	0.277231	1.20302	0.952293	1.16649	0.921779	0.620678	0.503835
ENSMUSG00000079906	Gm15846	FALSE	0.662992	1.58336	-0.808913	0.0300145	0.277788	0.70998	0.589515	0.687399	0.41899	0.443341	0.395871
ENSMUSG00000047155	Cyp4x1	TRUE	-1.08636	0.470949	-1.46812	0.0300487	0.277845	0.0788867	0.136042	0.354114	0.460889	0.37684	0.377876
ENSMUSG00000030557	Mef2a	TRUE	-0.188625	0.877442	5.8081	0.0300507	0.277845	54.9249	52.2854	52.2631	62.8276	62.223	56.7534
ENSMUSG00000059742	Kcnh7	TRUE	-0.79764	0.57529	1.37754	0.030132	0.278274	1.59746	2.10865	2.22884	4.3575	3.5024	2.46519
ENSMUSG00000006585	Cdt1	TRUE	0.16726	1.12292	6.43319	0.0301423	0.278274	86.6373	92.4631	85.8623	76.4238	76.9862	82.485
[truncated: 16,465 more rows]

## Sheet: Eif4a3_vs_Emx1-Cre
GeneID	GeneName	IsCoding	logFC(Eif4a3 / Emx1-Cre)	fold	logCPM	PValue	FDR	Eif4a3_1	Eif4a3_2	Eif4a3_3	Emx1-Cre_1	Emx1-Cre_2	Emx1-Cre_3
ENSMUSG00000082329	Gm14287	FALSE	6.33699	80.8394	-0.132085	1.33193e-40	2.45928e-36	2.52562	4.17924	3.60351	0	0.0221671	0.0899706
ENSMUSG00000080896	Gm14567	FALSE	2.78522	6.89344	-0.568427	2.45437e-17	2.26588e-13	2.29426	1.85265	1.65087	0.251394	0.37684	0.215929
ENSMUSG00000034457	Eda2r	TRUE	2.22237	4.66659	3.23007	1.46575e-15	9.02123e-12	23.9645	12.8608	8.91113	2.82818	3.32506	3.63481
ENSMUSG00000085666	Gm9855	FALSE	7.96419	249.724	3.53354	2.35592e-14	1.08749e-10	67.4398	0.667816	68.5731	0.125697	0.310339	0.107965
ENSMUSG00000059751	Rps3a3	TRUE	6.49433	90.1548	4.3409	4.08722e-14	1.50933e-10	106.924	127.101	1.88163	1.04748	0.642845	0.9177
ENSMUSG00000069045	Ddx3y	TRUE	-8.28456	0.003207	5.15248	5.32914e-12	1.45907e-08	0	0.0646274	0.372777	68.6306	71.6883	0
ENSMUSG00000056673	Kdm5d	TRUE	-7.6544	0.00496358	5.34892	5.53156e-12	1.45907e-08	0.0192795	0.215425	0.585792	80.3204	87.2274	0.0179941
ENSMUSG00000058443	Rpl10-ps3	TRUE	-2.17325	0.221711	0.330436	8.5671e-12	1.97729e-08	0.848299	0.689359	0.355025	3.47762	2.92605	2.12331
ENSMUSG00000058126	Tpm3-rs7	TRUE	4.20868	18.49	3.97604	1.54576e-11	3.17121e-08	78.3327	81.1504	3.79877	3.05863	2.90389	2.86106
ENSMUSG00000069049	Eif2s3y	TRUE	-7.80033	0.00448609	5.20206	1.78167e-11	3.28967e-08	0.0192795	0.215425	0.372777	65.7815	71.6661	0
ENSMUSG00000022257	Laptm4b	TRUE	0.677719	1.59961	5.54409	3.4442e-11	5.78124e-08	61.0775	63.0117	71.7861	42.6323	35.955	43.8337
ENSMUSG00000066362	Rps13-ps1	FALSE	7.53353	185.276	2.10535	4.07391e-11	6.26838e-08	0.0963976	25.3555	24.2305	0.125697	0.0443341	0.0899706
ENSMUSG00000086841	2410006H16Rik	FALSE	0.706049	1.63133	5.13539	6.3237e-11	8.9816e-08	40.4677	36.773	32.8931	21.1381	22.3666	23.9682
ENSMUSG00000020326	Ccng1	TRUE	0.820889	1.76649	6.30778	1.09258e-10	1.44096e-07	117.509	92.3741	72.8867	51.033	53.1566	55.8537
ENSMUSG00000097662	AC137902.1	FALSE	3.22706	9.36355	-2.09672	5.61908e-10	6.91671e-07	0.559106	0.732444	0.479284	0.104748	0.0221671	0.0539824
ENSMUSG00000074280	Gm6166	FALSE	3.9342	15.2866	2.993	6.47117e-10	7.46773e-07	37.6144	1.80957	40.7569	1.55026	2.21671	1.47552
ENSMUSG00000028893	Sesn2	TRUE	0.79079	1.73002	4.59927	9.8344e-10	1.01775e-06	35.1273	26.7773	27.479	17.032	15.8938	18.7139
ENSMUSG00000084349	Rpl3-ps1	FALSE	2.85254	7.2227	4.26585	9.9217e-10	1.01775e-06	8.27092	70.53	82.4546	6.97619	7.71414	7.62951
ENSMUSG00000091697	Eif3s6-ps2	FALSE	1.75718	3.38036	-0.263902	1.35861e-09	1.32029e-06	1.27245	1.50797	1.52661	0.43994	0.354673	0.467847
ENSMUSG00000062611	Rps3a2	TRUE	3.05483	8.30987	2.16445	6.2524e-09	5.77222e-06	16.5226	21.0254	1.72187	1.46647	1.79553	1.45752
ENSMUSG00000081087	Rps15a-ps7	FALSE	4.1976	18.3486	0.986196	8.29742e-09	7.29541e-06	0.385591	9.17709	10.5265	0.398041	0.199504	0.485841
ENSMUSG00000082241	Gm15776	FALSE	-1.54485	0.34273	0.169548	2.97095e-08	2.49344e-05	1.09893	0.646274	0.585792	2.22065	2.68222	1.92537
ENSMUSG00000084403	Rps15a-ps8	FALSE	7.88965	237.148	-0.752536	3.14131e-08	2.52179e-05	0	3.20983	3.40824	0	0.0221671	0
ENSMUSG00000080893	Gm15920	FALSE	3.1041	8.59858	1.03605	4.31936e-08	3.32303e-05	7.98172	0.689359	9.46142	0.586586	0.687179	0.827729
ENSMUSG00000041801	Phlda3	TRUE	1.09886	2.14185	3.30132	6.60823e-08	4.88058e-05	15.2887	12.7962	8.39635	6.4315	5.09843	5.48821
ENSMUSG00000080904	Gm11966	FALSE	-1.82899	0.281462	-1.05067	1.29383e-07	9.18821e-05	0.289193	0.301594	0.213015	0.87988	1.19702	0.791741
ENSMUSG00000048387	Osr1	TRUE	-2.02934	0.244966	1.14175	1.34814e-07	9.21929e-05	0.983256	0.904783	0.923066	6.36865	2.32754	2.80708
ENSMUSG00000045996	Polr2k	TRUE	-0.562755	0.677008	4.48969	1.55343e-07	0.000102438	15.8285	16.3938	16.6862	23.3168	24.3838	24.544
ENSMUSG00000032889	Gm6685	TRUE	4.10217	17.1741	-2.08646	1.66093e-07	0.00010575	0.867579	0.883241	0.106508	0.041899	0.0221671	0.0359882
ENSMUSG00000007682	Dio2	TRUE	-1.77611	0.291969	0.960163	1.81056e-07	0.000111434	1.31101	0.883241	0.692299	4.98598	2.39404	2.51918
ENSMUSG00000093483	AA465934	FALSE	1.42413	2.68352	3.21593	1.94897e-07	0.000116083	19.3952	23.2228	7.42003	6.3896	6.14028	6.10001
ENSMUSG00000040010	Slc7a5	TRUE	0.368919	1.29138	6.2708	2.24041e-07	0.000129272	86.3144	82.8092	89.2178	64.2522	65.4372	70.339
ENSMUSG00000081344	Gm14303	FALSE	-1.1496	0.450749	3.33038	2.83364e-07	0.000158546	12.1075	7.1521	6.14194	22.7931	17.9775	15.6009
ENSMUSG00000067870	Rpl31-ps8	FALSE	-1.02471	0.491511	1.83591	3.02197e-07	0.000162292	3.33536	2.95132	2.69819	6.87144	5.76344	5.65015
ENSMUSG00000004568	Arhgef18	TRUE	0.739283	1.66935	5.34378	3.07638e-07	0.000162292	45.9238	44.9376	49.455	29.3084	27.4207	27.3331
ENSMUSG00000073791	Efcab7	TRUE	0.802906	1.74461	2.86705	3.34049e-07	0.00017133	9.94824	9.30634	8.39635	5.09073	5.3866	5.36225
ENSMUSG00000066724	Gm10175	TRUE	-2.02139	0.24632	0.646844	3.62238e-07	0.000180767	1.71588	0.689359	0.461533	3.85471	4.87676	2.93304
ENSMUSG00000094685	Gm5900	TRUE	2.28612	4.87742	0.0573074	3.9596e-07	0.000187462	0.674783	3.64068	3.51475	0.523738	0.554177	0.521829
ENSMUSG00000081467	Gm13337	FALSE	8.08633	271.786	-2.32573	3.95888e-07	0.000187462	1.17605	0.797071	0	0	0	0
ENSMUSG00000096474	Gm5561	FALSE	-1.43423	0.370045	0.279052	4.66129e-07	0.000215165	1.11821	0.753986	0.869812	2.61869	2.81522	2.01534
ENSMUSG00000081926	Gm15536	FALSE	-2.09718	0.233715	-0.0934046	6.36093e-07	0.000286459	0.983256	0.25851	0.355025	3.14243	2.0837	1.65546
ENSMUSG00000095597	Gm6472	TRUE	2.68068	6.41158	3.13305	7.70768e-07	0.000338844	28.8229	43.7527	2.60944	4.12705	3.61323	3.9767
ENSMUSG00000060177	Klk1b22	TRUE	7.79181	221.6	-2.56856	9.24098e-07	0.000396804	0.790461	0.818613	0	0	0	0
ENSMUSG00000068457	Uty	TRUE	-7.32951	0.00621724	4.26056	1.03123e-06	0.000432744	0	0.150797	0.319523	36.3055	40.7652	0
ENSMUSG00000068854	Hist2h2be	TRUE	-0.612751	0.653949	4.55719	1.19974e-06	0.000492267	17.1009	16.0922	21.763	28.1352	29.3492	26.6493
ENSMUSG00000031781	Ciapin1	TRUE	0.365975	1.28875	6.29827	1.68224e-06	0.000675235	84.695	95.4546	81.9753	65.572	67.2327	70.501
ENSMUSG00000053117	E330013P04Rik	TRUE	-0.753393	0.593207	4.54078	2.56835e-06	0.00100898	19.0867	17.4709	20.7335	36.5779	31.8762	28.1788
ENSMUSG00000050299	Gm9843	TRUE	-1.05212	0.482259	2.18139	2.75856e-06	0.00106092	4.81988	3.05903	3.37274	9.30158	7.82498	6.24396
ENSMUSG00000042182	Bend6	TRUE	0.900888	1.86721	1.69579	2.81549e-06	0.00106092	5.0898	5.5795	4.68633	2.72344	2.79305	2.69912
ENSMUSG00000074968	Ano3	TRUE	0.977504	1.96906	2.18155	3.64092e-06	0.00134452	7.05631	5.90263	4.59758	3.14243	2.54921	3.20295
ENSMUSG00000073643	Wdfy1	TRUE	0.898176	1.86371	4.04651	4.18838e-06	0.00151636	28.8807	14.455	29.8221	13.1353	12.9677	13.1717
ENSMUSG00000035126	Wdr78	TRUE	-0.493069	0.710512	4.37988	4.6115e-06	0.00160654	17.8528	17.234	18.7453	26.124	24.9158	24.7599
ENSMUSG00000072476	Gm9008	TRUE	7.77303	218.733	-0.855415	4.61043e-06	0.00160654	0.0385591	0.0215425	5.78691	0	0	0.0179941
ENSMUSG00000043635	Adamts3	TRUE	0.545182	1.4592	5.30202	4.8901e-06	0.00167205	43.7645	42.0293	51.5319	29.057	33.8491	31.2378
ENSMUSG00000051379	Flrt3	TRUE	-0.380397	0.768226	6.22433	5.2307e-06	0.00175599	65.5118	72.1888	61.0998	91.8217	85.7201	81.1895
ENSMUSG00000069972	Rps13-ps2	FALSE	-1.48971	0.356085	0.854653	6.57809e-06	0.00213157	1.81228	0.624731	0.798807	3.83376	2.77088	2.51918
ENSMUSG00000040688	Tbl3	TRUE	0.376876	1.29853	6.49671	6.6958e-06	0.00213157	89.3992	102.197	110.661	75.7534	76.0109	80.9915
ENSMUSG00000082809	Gm14150	FALSE	4.06446	16.7311	1.33948	6.68029e-06	0.00213157	0.867579	23.8475	0.479284	0.502788	0.509843	0.485841
ENSMUSG00000067351	Rps15a-ps2	FALSE	6.20188	73.6124	-3.46587	9.30423e-06	0.00291175	0.0192795	0.280052	0.230766	0	0	0
ENSMUSG00000081214	Rpl35a-ps2	FALSE	-1.48983	0.356054	0.0491397	1.02492e-05	0.00307673	1.34957	0.495477	0.514787	2.53489	1.97287	2.1413
ENSMUSG00000085156	Gm11974	FALSE	0.682123	1.6045	3.65436	1.03313e-05	0.00307673	13.1679	13.7441	16.4732	8.12841	8.82249	10.0767
ENSMUSG00000023151	Lrrc69	TRUE	3.49203	11.2514	-2.85518	1.00982e-05	0.00307673	0.231354	0.215425	0.0887563	0.0209495	0	0.0179941
ENSMUSG00000053522	Lgals7	TRUE	-2.09357	0.2343	-1.36264	1.05105e-05	0.00308041	0.154236	0.107712	0.106508	0.628485	0.75368	0.233924
ENSMUSG00000081205	Gm5940	FALSE	-1.62783	0.323575	-1.15418	1.10623e-05	0.00316852	0.42415	0.280052	0.177513	1.21507	0.798015	0.719765
ENSMUSG00000019789	Hey2	TRUE	-0.998894	0.500384	2.16536	1.11543e-05	0.00316852	2.60274	3.20983	3.92303	8.4636	5.5196	5.5062
ENSMUSG00000074457	S100a16	TRUE	-0.674847	0.626399	3.09066	1.24666e-05	0.00348764	5.78386	5.62258	6.24844	9.80437	10.1525	8.27729
ENSMUSG00000076137	Gm26384	FALSE	-1.63317	0.322379	0.761075	1.38002e-05	0.00371891	1.90867	0.990953	0.621294	4.08516	4.58858	2.26726
ENSMUSG00000085154	C130046K22Rik	FALSE	-1.11842	0.460598	0.426216	1.39898e-05	0.00371891	0.636224	0.753986	0.639045	1.52931	1.52953	1.34956
ENSMUSG00000022385	Gtse1	TRUE	0.324618	1.25233	6.30331	1.36781e-05	0.00371891	88.7437	84.2095	90.0699	67.4784	68.1859	74.3337
ENSMUSG00000094344	Gm11942	FALSE	4.56399	23.6536	0.57763	1.4099e-05	0.00371891	0.250634	0.193882	15.0531	0.251394	0.199504	0.197935
ENSMUSG00000068744	Psrc1	TRUE	0.318701	1.24721	6.69572	1.47337e-05	0.00383158	118.665	114.498	110.342	87.4433	94.1879	93.7673
ENSMUSG00000097280	RP23-168E14.5	FALSE	-0.955148	0.515789	3.13714	1.5526e-05	0.00392701	7.07559	5.96726	5.09461	13.9733	11.7929	9.41092
ENSMUSG00000037617	Spag1	TRUE	-0.607171	0.656483	3.49304	1.53412e-05	0.00392701	8.05884	8.16459	9.44367	13.0306	13.1451	12.9558
ENSMUSG00000097428	RP23-168E14.4	FALSE	-0.729059	0.603297	4.08117	1.64559e-05	0.00410596	13.8427	13.6148	11.9111	23.7777	22.4109	19.0738
ENSMUSG00000059159	Gm8129	FALSE	-1.44939	0.366176	-0.896707	1.70184e-05	0.00418971	0.559106	0.301594	0.28402	1.23602	1.08619	0.827729
ENSMUSG00000027907	S100a11	TRUE	-0.612977	0.653846	4.54963	1.88392e-05	0.00457692	20.8412	18.8497	16.3667	34.8181	26.9773	23.9502
ENSMUSG00000062456	Rpl9-ps6	TRUE	-1.18011	0.441319	2.02423	1.94777e-05	0.00467061	4.72348	3.12366	2.44967	9.61583	7.73631	5.99204
ENSMUSG00000031765	Mt1	TRUE	-0.874277	0.545527	4.59712	2.40139e-05	0.00547398	13.4764	19.4744	13.8105	24.6157	24.5389	36.4921
ENSMUSG00000054737	Zfp182	TRUE	-0.519178	0.697769	4.04142	2.38763e-05	0.00547398	13.2643	12.9901	13.3489	20.0068	19.4405	17.3463
ENSMUSG00000039065	Fam173b	TRUE	-0.448197	0.732958	4.63974	2.389e-05	0.00547398	20.3785	19.022	20.4672	27.1087	27.465	27.1351
ENSMUSG00000082127	Gm13577	FALSE	1.4219	2.67939	4.24816	2.37208e-05	0.00547398	5.88026	30.1164	24.8518	7.66752	7.60331	7.43157
ENSMUSG00000083424	Rpl35a-ps4	FALSE	-1.84018	0.279288	-1.73879	2.76427e-05	0.00599107	0.269913	0.17234	0.14201	1.02653	0.620678	0.467847
ENSMUSG00000069793	Slfn9	TRUE	-0.538862	0.688314	5.05395	2.73691e-05	0.00599107	25.7382	21.8656	32.6978	42.1714	38.1274	36.4741
ENSMUSG00000025574	Tk1	TRUE	0.322568	1.25055	6.4503	2.79047e-05	0.00599107	87.2206	95.7347	104.892	74.0356	77.5182	78.6343
ENSMUSG00000040675	Mthfd1l	TRUE	0.495572	1.40988	5.44563	2.68396e-05	0.00599107	46.9842	46.2086	60.4608	33.1421	37.4624	38.3994
ENSMUSG00000002083	Bbc3	TRUE	0.707936	1.63347	3.23728	2.69557e-05	0.00599107	13.38	9.73719	9.99396	6.09631	6.33978	7.80945
ENSMUSG00000027663	Zmat3	TRUE	0.475934	1.39082	6.49382	3.01979e-05	0.0064089	136.036	104.61	90.993	73.0091	84.7447	80.6856
ENSMUSG00000064373	Sepp1	TRUE	-0.371882	0.772774	5.61297	3.12401e-05	0.00655474	42.3764	44.2051	42.745	60.8164	52.1813	54.3422
ENSMUSG00000064368	mt-Nd6	TRUE	-0.394747	0.760623	8.29267	3.57949e-05	0.00742604	307.142	308.359	289.754	341.812	424.61	423.689
ENSMUSG00000037984	Neurod6	TRUE	-3.82978	0.0703267	-0.843307	3.76844e-05	0.0076185	0.115677	0.17234	0	2.1159	1.6847	0.323894
ENSMUSG00000027820	Mme	TRUE	-0.712116	0.610424	5.00041	3.79605e-05	0.0076185	26.8757	24.5799	24.834	57.9254	31.1669	35.8983
ENSMUSG00000045414	1190002N15Rik	TRUE	-0.369178	0.774223	5.60056	3.7459e-05	0.0076185	43.1283	42.2448	42.674	58.093	51.1173	56.1596
ENSMUSG00000045799	Gm9800	FALSE	0.695366	1.6193	5.71479	3.97167e-05	0.00788526	36.207	66.4154	63.4963	29.2246	35.7333	37.6077
ENSMUSG00000030268	Bcat1	TRUE	0.346478	1.27145	7.07982	4.37302e-05	0.00858973	165.399	147.178	154.614	110.111	132.227	125.131
ENSMUSG00000030609	Aen	TRUE	0.373699	1.29567	6.30828	5.35938e-05	0.0104164	96.6483	74.6446	89.3776	64.8387	66.9889	69.3853
ENSMUSG00000085811	Gm11669	FALSE	-2.70335	0.153536	-2.52125	6.41624e-05	0.0123406	0.0385591	0.0430849	0	0.167596	0.221671	0.161947
ENSMUSG00000084328	Gm14046	FALSE	2.74272	6.6933	-0.984183	6.52693e-05	0.012424	0.0192795	0.603189	0.514787	0.125697	0.0221671	0.0179941
ENSMUSG00000060019	Gm10073	TRUE	-1.01272	0.495613	2.05813	6.75186e-05	0.012721	4.60781	3.03749	2.7692	8.81975	7.0713	5.14632
ENSMUSG00000031112	2610018G03Rik	TRUE	-0.63302	0.644825	4.28506	6.8412e-05	0.0127592	14.3247	14.5842	16.988	26.0193	19.9725	25.1918
ENSMUSG00000022048	Dpysl2	TRUE	-0.342924	0.788442	6.94144	7.205e-05	0.0133033	123.91	123.654	98.6793	142.603	150.315	146.148
ENSMUSG00000086794	Gm11642	FALSE	-1.16469	0.44606	-0.239452	7.78038e-05	0.0142235	0.40487	0.517019	0.355025	1.11032	0.997518	0.755753
ENSMUSG00000054204	Fam150b	TRUE	-1.61418	0.32665	0.258707	7.90533e-05	0.0143102	0.385591	0.797071	0.106508	1.29887	1.35219	1.24159
ENSMUSG00000031375	Bgn	TRUE	-0.701166	0.615075	5.58803	8.69688e-05	0.0152137	49.934	38.2379	30.2837	83.7981	56.9694	51.8231
ENSMUSG00000024827	Gldc	TRUE	0.312442	1.24181	7.28319	8.65519e-05	0.0152137	200.603	187.139	173.164	138.036	159.381	154.246
ENSMUSG00000059422	Gm8116	FALSE	1.67913	3.20235	-0.0404399	8.73403e-05	0.0152137	2.69913	2.75743	0.585792	0.481839	0.842349	0.557818
ENSMUSG00000085787	Gm13092	FALSE	1.78895	3.45563	0.438	8.71556e-05	0.0152137	4.31861	0.667816	3.86978	0.712283	0.820182	1.02566
ENSMUSG00000069008	Gm5537	FALSE	-2.18124	0.220485	-2.04789	9.23425e-05	0.0159347	0.231354	0.0861698	0.0177513	0.628485	0.53201	0.377876
ENSMUSG00000070870	Cryge	TRUE	2.07421	4.21114	-1.53436	9.61533e-05	0.0164387	0.327752	0.344679	0.443782	0.0837981	0.0443341	0.125959
ENSMUSG00000040289	Hey1	TRUE	-0.445629	0.734264	5.87221	9.74773e-05	0.0165121	50.9365	54.3732	46.1178	70.9141	73.3065	62.0077
ENSMUSG00000056412	Gm12396	FALSE	-1.08059	0.472837	-0.353975	0.00011882	0.0197648	0.578386	0.495477	0.443782	1.21507	0.953184	1.04366
ENSMUSG00000066357	Wdr6	TRUE	0.298402	1.22978	8.28784	0.000118423	0.0197648	320.059	330.203	344.321	272.553	260.042	276.138
ENSMUSG00000078154	Gm12184	TRUE	-1.17376	0.443266	0.383636	0.00012446	0.0205181	1.71588	0.818613	0.656797	2.57679	2.54921	2.08732
ENSMUSG00000040918	Slc19a2	TRUE	0.424225	1.34185	4.49004	0.000127147	0.0207757	26.1238	27.1866	23.0056	18.8546	18.3987	19.5776
ENSMUSG00000026483	Fam129a	TRUE	-1.64929	0.318796	1.05018	0.000129372	0.0209536	2.00507	1.12021	0.355025	4.71364	3.5024	2.69912
ENSMUSG00000077345	Snord70	FALSE	1.36458	2.57502	-1.14841	0.000135501	0.0217556	0.539827	0.624731	0.621294	0.104748	0.354673	0.233924
ENSMUSG00000080848	Gm9385	FALSE	-0.823343	0.565131	1.43946	0.000156144	0.0248538	2.62202	2.52047	1.79288	4.37845	4.21174	3.6708
ENSMUSG00000079223	Gm8778	FALSE	4.49304	22.5185	-3.48445	0.000161189	0.0254375	0.289193	0.301594	0.0177513	0	0	0.0179941
ENSMUSG00000027985	Lef1	TRUE	-0.332729	0.794033	5.78914	0.000163629	0.0255723	55.5636	51.982	56.7685	70.139	65.5702	71.2387
ENSMUSG00000045193	Cirbp	TRUE	0.428254	1.3456	6.08053	0.000164813	0.0255723	87.0085	84.6403	63.6915	59.4128	62.489	52.9927
ENSMUSG00000026826	Nr4a2	TRUE	-0.607357	0.656398	4.54127	0.00017161	0.0264051	18.9711	19.9914	20.1654	38.3586	24.3394	27.387
ENSMUSG00000083669	Gm10169	FALSE	-0.977371	0.507904	1.4788	0.000181083	0.0274169	3.56671	1.74494	2.0769	5.21643	5.5196	3.85074
ENSMUSG00000062132	Gm1082	FALSE	2.01446	4.04029	-2.22737	0.000181156	0.0274169	0.385591	0.25851	0.266269	0.041899	0.0443341	0.125959
ENSMUSG00000031762	Mt2	TRUE	-0.986012	0.504871	4.82941	0.000183035	0.0274761	13.7656	23.2443	14.7868	23.9243	29.194	49.4118
ENSMUSG00000056216	Cebpg	TRUE	-0.293238	0.816068	6.87986	0.000188993	0.0281417	98.6533	113.787	99.8331	118.365	131.185	133.013
ENSMUSG00000025931	Paqr8	TRUE	-0.472839	0.720545	4.00442	0.00019304	0.0285144	14.8838	13.5287	13.0294	18.8755	20.172	18.48
ENSMUSG00000087413	Gm11266	FALSE	-1.60983	0.327636	0.797909	0.000195221	0.0286076	1.33029	1.05558	0.461533	3.89661	3.21423	1.58348
ENSMUSG00000022150	Dab2	TRUE	-0.482581	0.715696	6.18181	0.000201906	0.029125	70.9679	67.9234	50.8751	110.781	79.0921	75.2514
ENSMUSG00000040354	Mars	TRUE	0.296183	1.22789	7.09661	0.000200993	0.029125	129.404	147.566	154.365	109.922	115.646	125.671
ENSMUSG00000036298	Slc2a13	TRUE	-0.813768	0.568894	2.5783	0.000209476	0.029752	5.70674	4.73934	3.86978	10.6633	8.17965	6.33393
ENSMUSG00000025467	Prap1	TRUE	4.39233	21.0002	-1.97074	0.000209031	0.029752	2.02435	0.25851	0	0	0.0665012	0.0359882
ENSMUSG00000050550	Gm11868	FALSE	2.16363	4.48041	0.713708	0.000211289	0.0297804	0.771181	1.40026	8.4141	0.586586	1.13052	0.647788
ENSMUSG00000078160	Gm16503	TRUE	0.867398	1.82437	1.61973	0.000216566	0.030293	4.41501	3.57605	3.67451	2.074	1.57386	2.71711
ENSMUSG00000016528	Mapkapk2	TRUE	0.294937	1.22683	7.02169	0.00021887	0.030385	127.785	136.601	156.158	114.447	110.835	117.52
ENSMUSG00000075312	Gm13597	FALSE	-1.47857	0.358845	-1.02329	0.000228179	0.031441	0.462709	0.150797	0.248518	1.19412	0.687179	0.557818
ENSMUSG00000021549	Rasa1	TRUE	-0.252383	0.839509	6.89487	0.000232442	0.0315574	109.701	115.08	103.135	126.849	136.593	127.128
ENSMUSG00000002633	Shh	TRUE	5.32775	40.1619	1.34968	0.00023139	0.0315574	0.115677	0.0646274	4.72184	0	0.0221671	0.0899706
ENSMUSG00000055541	Lair1	TRUE	-1.0655	0.477807	0.154279	0.000239082	0.032222	0.867579	0.581646	0.621294	1.46647	1.83987	1.06165
ENSMUSG00000072889	Nfxl1	TRUE	0.285705	1.21901	5.89419	0.000241493	0.0323111	61.5981	63.7011	64.7744	49.1266	54.0433	52.7588
ENSMUSG00000037855	Zfp365	TRUE	0.711736	1.63777	3.21871	0.00024692	0.0327995	16.4262	11.3098	9.26616	7.18568	7.29297	8.09735
ENSMUSG00000046101	Mcmdc2	TRUE	-0.742913	0.597532	1.65765	0.000254899	0.0336176	2.19787	1.74494	2.1124	3.18433	3.23639	3.72478
ENSMUSG00000073678	Pgap1	TRUE	-0.352088	0.78345	6.39914	0.000268934	0.0344833	80.627	82.2276	64.1176	95.7812	101.259	92.6157
ENSMUSG00000000957	Mmp14	TRUE	-0.339477	0.790328	6.29388	0.000266331	0.0344833	74.1105	66.0923	64.1176	99.1121	74.8582	84.5364
ENSMUSG00000079553	Kifc1	TRUE	0.253075	1.19174	6.3997	0.000267731	0.0344833	92.1369	89.9829	90.5669	74.5593	75.1907	79.0302
ENSMUSG00000037103	Dcaf15	TRUE	0.279992	1.21419	6.32366	0.000264729	0.0344833	78.2749	88.7765	87.354	67.9183	70.4913	71.0948
ENSMUSG00000066107	Gm12666	TRUE	6.15748	71.3814	-1.74133	0.000276576	0.0352186	0	3.23137	0.0177513	0	0	0.0359882
ENSMUSG00000037570	Mcrs1	TRUE	0.249267	1.1886	6.54393	0.000280928	0.0355278	97.4966	101.099	98.484	80.8861	83.6364	85.3821
ENSMUSG00000028031	Dkk2	TRUE	-1.58674	0.332924	3.84579	0.000285166	0.0358183	10.5266	10.1896	2.34317	35.4675	18.9307	14.8451
ENSMUSG00000088609	Gm24187	FALSE	0.866167	1.82281	3.4496	0.000293013	0.0365554	7.55758	11.6976	9.88745	5.99156	3.92357	6.04602
ENSMUSG00000040152	Thbs1	TRUE	-0.481484	0.71624	7.34619	0.000296378	0.036727	165.553	129.427	119.874	224.432	196.201	158.618
ENSMUSG00000027792	Bche	TRUE	0.68555	1.60831	3.39554	0.000299337	0.0368464	10.6616	13.3132	13.3845	6.68289	7.4703	9.05104
ENSMUSG00000000384	Tbrg4	TRUE	0.293323	1.22546	6.25999	0.000318858	0.0387328	78.005	81.926	89.7149	63.1209	67.6982	72.8762
ENSMUSG00000090075	Gm16251	FALSE	3.56081	11.8008	-3.14353	0.000318115	0.0387328	0.385591	0.107712	0.0532538	0	0	0.0359882
ENSMUSG00000041797	Abca9	TRUE	-0.559178	0.678689	3.86498	0.000332808	0.0401632	13.0908	11.7622	11.0413	22.1017	14.6081	16.1767
ENSMUSG00000085912	Trp53cor1	FALSE	1.21947	2.32861	0.106648	0.000335171	0.0401857	2.15931	1.09867	0.905314	0.460889	0.731513	0.593806
ENSMUSG00000022676	Snai2	TRUE	-0.896018	0.537368	2.80313	0.00034255	0.0408055	5.61034	6.48428	3.07097	12.5697	8.62299	6.99971
ENSMUSG00000004328	Hif3a	TRUE	-0.809646	0.570522	4.0535	0.000345353	0.0408756	17.4094	12.2146	10.0472	28.4285	23.2533	17.8682
ENSMUSG00000052951	C130021I20Rik	FALSE	-0.769402	0.586661	3.88274	0.000356835	0.0414378	11.8569	10.7066	10.7218	28.1352	14.2978	14.3233
ENSMUSG00000074212	Dnajb14	TRUE	-0.362375	0.777883	5.13148	0.000354792	0.0414378	33.4114	31.5166	28.4553	41.2496	42.1618	36.654
ENSMUSG00000067017	Gm3608	FALSE	2.0661	4.18753	2.43913	0.000355097	0.0414378	3.02689	31.689	3.40824	3.58237	2.90389	2.60915
ENSMUSG00000021414	Fam217a	TRUE	-1.01029	0.496446	-0.270441	0.000373488	0.0431005	0.539827	0.538561	0.355025	0.984627	0.975351	0.9177
ENSMUSG00000018554	Ybx2	TRUE	-0.682302	0.62317	4.07686	0.000384333	0.0440766	10.7387	9.32788	17.0945	20.2372	18.7312	20.7292
ENSMUSG00000026121	Sema4c	TRUE	0.250529	1.18964	6.3665	0.000392538	0.0447397	81.0511	87.3331	85.7564	72.4015	70.1144	71.0948
ENSMUSG00000028364	Tnc	TRUE	-1.07661	0.474142	2.80453	0.000402348	0.0453097	4.53069	4.07152	3.26623	13.4496	5.03193	6.54986
ENSMUSG00000033350	Chst2	TRUE	-0.371776	0.772831	5.73088	0.000402447	0.0453097	52.8066	46.8333	46.2598	66.0329	65.9027	56.8974
ENSMUSG00000051166	Eml5	TRUE	-0.416146	0.749424	7.21876	0.000408935	0.0456885	154.737	145.132	104.218	179.454	196.977	162.739
ENSMUSG00000049830	Gm9839	FALSE	2.87352	7.32851	-2.0731	0.000410761	0.0456885	0.0192795	0.215425	0.248518	0	0	0.0539824
ENSMUSG00000081731	Gm14078	FALSE	3.34222	10.1417	-2.92813	0.000415673	0.0459581	0.578386	0.280052	0.0355025	0.041899	0.0221671	0.0179941
ENSMUSG00000031967	Afg3l1	TRUE	0.255903	1.19408	6.45641	0.000418235	0.045966	91.1729	98.9445	96.3894	74.7898	83.1265	81.9992
ENSMUSG00000068220	Lgals1	TRUE	-0.45828	0.727853	6.36281	0.000423272	0.0462444	73.4743	69.6252	56.1295	116.395	73.8163	83.4747
ENSMUSG00000020802	Ube2o	TRUE	0.258903	1.19657	6.3842	0.000434781	0.0472224	86.5072	87.0962	98.2177	73.1767	77.1414	76.8889
ENSMUSG00000039826	Trub2	TRUE	0.300428	1.23151	5.67896	0.000447542	0.0483241	53.4236	56.7428	53.8928	41.5848	45.1322	46.4608
ENSMUSG00000028565	Nfia	TRUE	-0.821327	0.565921	5.0645	0.000464394	0.0498521	36.5154	23.9121	19.9702	53.8403	51.4276	36.816
ENSMUSG00000039130	Zc3hc1	TRUE	0.303266	1.23393	5.75644	0.000472046	0.0500911	54.349	57.4968	61.6324	47.6392	44.844	48.0983
ENSMUSG00000084166	Gm6451	FALSE	0.826105	1.77289	1.40939	0.000471234	0.0500911	2.14003	3.48988	3.5325	1.52931	1.79553	1.8354
ENSMUSG00000090101	Snhg9	FALSE	-1.61945	0.32546	-2.03349	0.000481547	0.0502332	0.0771181	0.107712	0.159761	0.41899	0.443341	0.233924
ENSMUSG00000083087	Gm11249	FALSE	-0.984393	0.505438	-0.426988	0.000480964	0.0502332	0.616945	0.581646	0.621294	1.50836	1.21919	0.899706
ENSMUSG00000046351	Zfp322a	TRUE	-0.263698	0.83295	6.52402	0.00047857	0.0502332	80.145	91.2754	81.9931	97.5619	104.806	101.811
ENSMUSG00000057863	Rpl36	TRUE	0.351656	1.27602	8.09521	0.000493435	0.0511842	244.002	294.184	334.398	229.125	223.023	231.692
ENSMUSG00000036103	Colec12	TRUE	-0.470804	0.721562	6.87731	0.000500912	0.0516695	109.623	96.1655	99.8864	184.984	110.902	127.758
ENSMUSG00000047878	A4galt	TRUE	-1.45185	0.365553	-0.726452	0.000506518	0.0519575	0.539827	0.301594	0.14201	1.29887	0.842349	0.557818
ENSMUSG00000026622	Nek2	TRUE	0.256573	1.19464	6.2699	0.000512293	0.0522595	84.8878	84.9635	86.2711	68.5887	72.7967	73.0021
ENSMUSG00000054196	Cthrc1	TRUE	-0.579777	0.669067	4.15722	0.000517605	0.0525113	9.50481	12.9255	12.8874	17.8071	15.5391	19.4157
ENSMUSG00000032698	Lmo2	TRUE	-0.548109	0.683916	4.99184	0.000527908	0.0532639	32.1775	25.7217	21.9051	46.0889	36.5757	34.0269
ENSMUSG00000079429	Mroh2a	TRUE	0.38662	1.30733	4.61075	0.000536923	0.0538791	28.3409	29.9656	30.3192	22.2484	22.4109	23.1224
ENSMUSG00000091460	Gm7808	TRUE	-1.16963	0.444535	-0.307883	0.000543959	0.05429	0.848299	0.452392	0.497035	1.73881	1.04185	1.27758
ENSMUSG00000078564	Gm9631	TRUE	-0.629321	0.646481	3.28254	0.000559405	0.0552345	5.80314	7.863	7.61529	8.73595	11.8594	12.308
ENSMUSG00000027889	Ampd2	TRUE	0.322705	1.25067	6.28495	0.00055645	0.0552345	78.6026	78.2422	99.2473	67.0384	65.3707	72.3723
ENSMUSG00000024325	Ring1	TRUE	0.387816	1.30841	5.77955	0.000566461	0.0556337	49.2014	62.6024	67.3838	44.7272	46.8169	45.4172
ENSMUSG00000025858	Get4	TRUE	0.320119	1.24843	5.77645	0.000570624	0.0557461	51.11	60.4266	61.7744	44.9367	45.9302	47.9363
ENSMUSG00000025316	Banp	TRUE	-0.356722	0.780937	5.23568	0.0005934	0.057666	31.7148	31.0858	35.5025	45.0415	42.9154	38.0036
ENSMUSG00000040181	Fmo1	TRUE	-0.766321	0.587915	2.9639	0.000620869	0.0596178	6.05377	7.23827	5.36088	15.1255	8.11315	8.47523
ENSMUSG00000039109	F13a1	TRUE	-0.726444	0.604392	3.39919	0.00062586	0.0596178	9.09994	8.66007	6.3727	17.9956	10.0195	11.8941
ENSMUSG00000021756	Il6st	TRUE	-0.403614	0.755962	6.68026	0.0006264	0.0596178	108.235	90.1983	78.9399	145.117	116.71	105.104
ENSMUSG00000019214	Chtf18	TRUE	0.321102	1.24928	5.49815	0.000622193	0.0596178	48.141	49.9354	54.6029	39.7412	40.7874	41.6924
ENSMUSG00000079003	Samd1	TRUE	-0.290135	0.817825	6.05202	0.000636169	0.0600171	64.1815	59.6511	62.6442	76.7171	77.0971	74.2437
ENSMUSG00000010755	Cars	TRUE	0.267309	1.20356	6.20057	0.000637096	0.0600171	74.2069	80.7411	81.8333	60.6069	65.7032	70.375
ENSMUSG00000085882	2610507I01Rik	FALSE	-0.66999	0.628511	2.99951	0.000651244	0.0608564	4.1451	5.23482	7.31352	9.59488	8.73383	8.27729
ENSMUSG00000022108	Itm2b	TRUE	-0.316854	0.802819	6.4383	0.000652909	0.0608564	85.2541	82.3999	68.0051	106.465	96.4268	90.6184
ENSMUSG00000053129	Gsx1	TRUE	1.7947	3.46943	0.55001	0.000655894	0.0608564	0.771181	1.20638	2.28991	0.167596	0.554177	0.503835
ENSMUSG00000038679	Trps1	TRUE	-0.255168	0.837889	6.0853	0.00066453	0.0613494	66.283	65.683	60.8336	72.2339	80.2448	77.5906
ENSMUSG00000040856	Dlk1	TRUE	0.777399	1.71404	7.22116	0.000675661	0.0620667	114.501	157.131	231.547	79.8386	99.5301	114.191
ENSMUSG00000037108	Zcwpw1	TRUE	-0.498079	0.708049	3.21313	0.000687169	0.0625019	7.48046	8.89704	7.29577	10.5376	11.5269	11.3363
ENSMUSG00000041912	Tdrkh	TRUE	-0.283635	0.821519	5.69991	0.000684729	0.0625019	51.3414	46.8764	46.1533	57.6531	59.4078	58.6788
ENSMUSG00000074578	1500012F01Rik	TRUE	0.384761	1.30564	5.78686	0.000696687	0.063057	48.8543	59.4356	64.8809	39.7412	44.8662	48.0083
ENSMUSG00000020472	Zkscan17	TRUE	0.240967	1.18178	6.41757	0.000704486	0.0634518	88.6473	91.9217	97.6852	77.0523	76.5429	81.8372
ENSMUSG00000026694	Mettl13	TRUE	0.340757	1.26642	5.31164	0.000711668	0.0637875	40.0436	44.162	46.5793	30.9005	35.6668	36.69
ENSMUSG00000081669	Npm3-ps1	FALSE	1.7922	3.46343	-1.4391	0.000724209	0.0645981	0.82902	1.20638	0.213015	0.272344	0.110835	0.251918
ENSMUSG00000001039	B9d1	TRUE	0.364903	1.28779	4.35295	0.000749154	0.0665018	22.21	24.0629	22.1003	18.0166	17.0908	17.9581
ENSMUSG00000037035	Inhbb	TRUE	-1.54659	0.342317	-0.179035	0.000769564	0.0673423	0.751902	0.560104	0.195264	1.42457	1.97287	1.00767
ENSMUSG00000058905	Gm10051	FALSE	-1.52362	0.347812	-1.30223	0.000767969	0.0673423	0.366311	0.323137	0.124259	1.13127	0.798015	0.413865
ENSMUSG00000003974	Grm3	TRUE	-1.44759	0.366632	-1.39842	0.000767299	0.0673423	0.154236	0.129255	0.301771	0.502788	0.554177	0.575812
ENSMUSG00000020444	Guk1	TRUE	0.385691	1.30649	4.62982	0.000787594	0.068595	23.9645	29.2762	27.4257	20.6353	19.4405	21.6289
ENSMUSG00000025035	Arl3	TRUE	-0.30396	0.810026	6.14025	0.000796062	0.069007	60.8655	56.2258	73.0287	76.3819	78.2719	80.1458
ENSMUSG00000064193	Gm4735	FALSE	-0.929069	0.525197	1.6041	0.000807452	0.0694147	4.02942	1.91728	2.55618	6.66195	5.20926	4.35458
ENSMUSG00000049336	Tenm2	TRUE	-0.927806	0.525657	3.0327	0.000812044	0.0694147	8.57939	5.29944	3.85202	13.3029	11.6377	8.79912
ENSMUSG00000024431	Nr3c1	TRUE	-0.531768	0.691707	3.56829	0.00080829	0.0694147	10.8544	9.54331	9.01764	16.9901	12.3471	13.1897
ENSMUSG00000032397	Tipin	TRUE	0.264099	1.20089	6.87557	0.000825234	0.0702171	123.967	138.647	120.247	97.918	109.527	111.294
ENSMUSG00000045573	Penk	TRUE	-1.13388	0.455689	0.0448774	0.000833897	0.0703063	0.655504	0.840156	0.355025	1.25697	1.72903	1.06165
ENSMUSG00000028948	Nol9	TRUE	0.273437	1.20868	6.3505	0.000832571	0.0703063	82.5357	91.2323	100.401	72.2758	76.3434	78.2204
ENSMUSG00000056708	Ier5	TRUE	-0.380181	0.768341	5.43539	0.000838193	0.0703472	40.3521	39.1426	34.8635	51.9757	52.669	44.2115
ENSMUSG00000083621	Gm14586	FALSE	-0.523306	0.695776	3.25707	0.000851208	0.0711163	8.30948	8.18613	9.39042	14.12	12.4801	10.6525
ENSMUSG00000022129	Dct	TRUE	-0.976673	0.50815	2.92399	0.000863572	0.0715905	7.61541	4.97631	3.37274	10.1815	12.3692	8.8711
ENSMUSG00000041144	Dnahc7b	TRUE	-0.496177	0.708983	3.72991	0.000864638	0.0715905	10.3338	8.5739	11.4673	14.539	13.2781	15.0611
ENSMUSG00000022945	Chaf1b	TRUE	0.280569	1.21467	6.39177	0.000891393	0.0734762	84.078	92.0725	102.922	72.7996	75.5897	81.3514
ENSMUSG00000038119	Cdon	TRUE	-0.432238	0.741111	7.64834	0.000896221	0.0735459	219.999	173.115	171.601	279.718	268.332	213.986
ENSMUSG00000082585	Gm15387	FALSE	-0.732073	0.602038	1.76065	0.000919969	0.0735483	3.58599	3.16674	2.25441	5.23738	5.36443	4.35458
ENSMUSG00000055435	Maf	TRUE	-0.476036	0.71895	4.10448	0.00090664	0.0735483	14.7103	14.7781	15.1951	25.4746	17.778	18.9118
ENSMUSG00000025478	Dpysl4	TRUE	0.380594	1.30188	6.42973	0.00090956	0.0735483	79.8365	91.4908	86.6439	60.7745	68.3854	68.9715
ENSMUSG00000064655	Gm25788	FALSE	1.50351	2.83532	-1.58277	0.000912399	0.0735483	0.347032	0.280052	0.355025	0.104748	0.110835	0.125959
ENSMUSG00000091639	Gm3756	FALSE	2.87189	7.32023	-1.23938	0.00092015	0.0735483	0.115677	2.82206	0.106508	0.0837981	0.199504	0.125959
ENSMUSG00000004552	Ctse	TRUE	3.45393	10.9581	-1.55521	0.000901659	0.0735483	0.192795	0.0430849	2.78695	0.125697	0.110835	0.0359882
ENSMUSG00000030549	Rhcg	TRUE	-1.03483	0.488074	1.93594	0.000932638	0.0742251	3.104	2.67126	2.00589	6.93429	4.65508	4.35458
ENSMUSG00000035049	Rrp12	TRUE	0.309546	1.23932	6.08228	0.000946561	0.0749713	68.0375	72.2319	84.2652	56.9827	61.0481	63.1594
ENSMUSG00000056553	Ptprn2	TRUE	0.580272	1.49513	5.31579	0.000950135	0.0749713	38.0771	41.4908	48.0349	20.8029	31.2777	33.2531
ENSMUSG00000036446	Lum	TRUE	-0.5893	0.664665	6.39829	0.000980316	0.0764827	90.3246	75.1616	47.2184	130.536	94.3874	95.0629
ENSMUSG00000075704	Txnrd2	TRUE	0.40835	1.32717	4.1686	0.000981716	0.0764827	17.66	20.5084	21.9583	14.7694	14.6524	15.8708
ENSMUSG00000093846	Gm4425	FALSE	0.926898	1.90118	0.952941	0.000980044	0.0764827	1.85083	2.71435	2.91121	1.23602	1.55169	1.15162
ENSMUSG00000041559	Fmod	TRUE	-1.10648	0.464426	0.93873	0.0010052	0.077333	0.790461	1.74494	1.13608	3.91756	1.46303	2.50118
ENSMUSG00000029661	Col1a2	TRUE	-0.556218	0.680083	7.84494	0.000997626	0.077333	202.821	209.479	141.495	360.813	217.858	235.597
ENSMUSG00000043557	Mdga1	TRUE	-0.422413	0.746176	4.92287	0.00100363	0.077333	29.4977	23.1581	26.7867	36.7664	37.1742	32.5873
ENSMUSG00000015484	Fam163a	TRUE	-0.953561	0.516356	2.24961	0.00101159	0.0775024	3.43176	1.80957	4.77509	9.05019	5.03193	5.38024
ENSMUSG00000040254	Sema3d	TRUE	-0.958391	0.514631	2.22485	0.00105535	0.0785724	3.04617	4.39466	1.65087	4.4413	7.22647	5.95605
ENSMUSG00000039278	Pcsk1n	TRUE	-0.89586	0.537427	1.51133	0.00105214	0.0785724	2.12075	1.80957	1.4556	4.2318	3.16989	2.62714
ENSMUSG00000028532	Cachd1	TRUE	-0.329806	0.795644	7.17135	0.0010483	0.0785724	136.171	119.431	153.389	185.152	167.871	161.119
ENSMUSG00000092203	1110038B12Rik	FALSE	0.298832	1.23015	6.8286	0.00104813	0.0785724	103.28	123.568	130.117	86.7938	99.8627	103.502
ENSMUSG00000070699	Sars2	TRUE	0.34916	1.27382	4.8336	0.00105131	0.0785724	30.7316	33.6493	30.9227	24.6995	24.0956	25.9835
ENSMUSG00000027371	Fahd2a	TRUE	0.475432	1.39033	3.12037	0.0010421	0.0785724	9.40841	9.75873	9.72769	7.16473	6.87179	6.74779
ENSMUSG00000097453	AC134530.1	FALSE	4.97751	31.505	-3.36304	0.0010382	0.0785724	0.0192795	0	0.195264	0	0	0
ENSMUSG00000039114	Nrn1	TRUE	-0.800376	0.5742	4.37907	0.00106344	0.0788565	19.5109	17.6864	10.136	36.6616	25.1375	20.6213
ENSMUSG00000083283	Gm15361	FALSE	2.10864	4.31286	-2.68812	0.0010763	0.079491	0.212075	0.193882	0.14201	0.041899	0.0221671	0.0539824
ENSMUSG00000029522	Pla2g1b	TRUE	-2.14604	0.225931	-2.31334	0.00109503	0.080552	0.0192795	0.0646274	0.0887563	0.188546	0.221671	0.377876
ENSMUSG00000071856	Mcc	TRUE	-0.526832	0.694077	3.61493	0.00110186	0.0807332	13.8234	9.88799	10.1537	17.8071	14.8519	16.1407
ENSMUSG00000021938	Pspc1	TRUE	0.243556	1.18391	6.96474	0.00111557	0.0814147	136.827	139.186	131.643	104.412	120.345	119.535
ENSMUSG00000097825	AC093341.1	FALSE	-1.63594	0.321761	-1.59687	0.00112394	0.0817025	0.269913	0.150797	0.0710051	0.607536	0.687179	0.251918
ENSMUSG00000078851	Hist3h2a	TRUE	-1.01398	0.495179	1.715	0.00112967	0.0817968	3.2968	2.15425	1.10058	4.60889	5.27576	3.34691
ENSMUSG00000041959	S100a10	TRUE	-0.486075	0.713965	4.38359	0.0011391	0.0821579	14.3825	18.1388	13.8815	27.2972	19.2632	18.408
ENSMUSG00000053477	Tcf4	TRUE	-0.372851	0.772255	7.71876	0.00115122	0.0823529	218.109	202.241	161.821	269.474	270.571	213.824
ENSMUSG00000053716	Dusp7	TRUE	-0.287812	0.819144	5.7324	0.00115903	0.0823529	46.348	47.8027	49.9698	60.4603	56.0827	59.3986
ENSMUSG00000020523	Fam114a2	TRUE	-0.225815	0.855112	6.1733	0.00115965	0.0823529	67.6326	66.1784	65.7684	77.8693	80.533	75.0355
ENSMUSG00000059070	Rpl18	TRUE	0.317266	1.24597	9.04517	0.00115322	0.0823529	524.904	570.918	627.117	455.296	435.716	491.779
ENSMUSG00000086568	9130020K20Rik	FALSE	-0.698337	0.616282	2.06526	0.00117377	0.0827747	4.28006	3.03749	2.68044	5.38403	4.83242	5.99204
ENSMUSG00000004264	Phb2	TRUE	0.249405	1.18872	7.1254	0.00117566	0.0827747	136.846	150.991	163.649	126.619	125.665	127.542
ENSMUSG00000027404	Snrpb	TRUE	0.309208	1.23903	8.13015	0.00117904	0.0827747	251.405	301.401	330.493	231.262	232.045	249.578
ENSMUSG00000002984	Tomm40	TRUE	0.30022	1.23133	6.19893	0.00118651	0.0829841	73.8984	74.7092	92.3776	64.1265	61.8461	69.7452
ENSMUSG00000032010	Usp2	TRUE	0.506747	1.42084	3.08741	0.00121335	0.0845408	10.8544	9.45714	9.72769	7.41613	6.53929	7.17965
ENSMUSG00000043091	Tuba1c	TRUE	0.43855	1.35524	6.61255	0.0012315	0.085483	94.9902	153.749	98.4663	80.4042	79.8458	95.8547
ENSMUSG00000098234	Snhg6	FALSE	0.379248	1.30066	4.76694	0.00126841	0.0877152	25.0827	31.7105	28.1713	20.5305	22.2336	22.5286
ENSMUSG00000058603	Rpl28-ps1	FALSE	-0.701423	0.614965	1.93405	0.00127831	0.0877426	4.56925	2.95132	3.03547	6.45245	5.5861	5.14632
ENSMUSG00000028165	Cisd2	TRUE	-0.258549	0.835928	6.50436	0.00127616	0.0877426	86.006	80.3318	75.2299	87.4642	103.343	98.1579
ENSMUSG00000052949	Rnf157	TRUE	-0.395413	0.760272	5.39049	0.00128418	0.0878189	41.9523	37.1392	31.7038	50.7188	47.903	47.0906
ENSMUSG00000007029	Vars	TRUE	0.318247	1.24681	8.04956	0.00129225	0.0880446	251.482	290.823	332.801	220.284	232.51	249.075
ENSMUSG00000041329	Atp1b2	TRUE	-0.669139	0.628882	3.39146	0.00130035	0.0882712	10.1989	7.88454	7.65079	13.701	10.4407	16.7525
ENSMUSG00000020484	Xbp1	TRUE	-0.324337	0.798666	6.11385	0.00130517	0.0882733	53.5007	58.337	66.4962	76.9266	70.4691	75.9172
ENSMUSG00000035027	Map2k2	TRUE	0.238761	1.17998	6.76921	0.00131227	0.0884298	104.938	117.708	119.661	97.918	91.2175	100.911
ENSMUSG00000082272	Gm11675	FALSE	-1.86489	0.274544	-2.85789	0.00133804	0.0898385	0.0192795	0.0861698	0.0532538	0.188546	0.199504	0.197935
ENSMUSG00000096701	Gm9285	FALSE	2.09028	4.25832	-2.85846	0.00134639	0.0900716	0.231354	0.280052	0.124259	0.041899	0.0665012	0.0359882
ENSMUSG00000032715	Trib3	TRUE	-1.10376	0.465301	1.15454	0.00137608	0.0911028	1.17605	1.12021	1.86388	2.66059	1.86203	4.42655
ENSMUSG00000091844	Gm8251	TRUE	-0.789807	0.578421	1.39906	0.00139848	0.0911028	1.46524	2.4343	1.43785	3.05863	3.14772	2.98702
ENSMUSG00000019873	Reep3	TRUE	-0.269831	0.829417	6.79646	0.00138978	0.0911028	121.095	106.054	95.6971	132.673	135.108	121.478
ENSMUSG00000069806	Cacng7	TRUE	-0.242523	0.845266	6.42459	0.00138346	0.0911028	86.6422	80.7842	79.7387	96.9753	103.454	92.0399
ENSMUSG00000006585	Cdt1	TRUE	0.246055	1.18596	6.43319	0.00140128	0.0911028	87.9532	92.9773	98.8568	76.4238	76.9862	82.485
ENSMUSG00000039041	Adrm1	TRUE	0.251573	1.1905	6.5089	0.00138759	0.0911028	94.1612	92.9988	103.401	77.9531	77.1636	88.9089
ENSMUSG00000057278	Snrpg	TRUE	0.340902	1.26655	6.9825	0.00139888	0.0911028	101.892	139.466	151.134	99.0912	104.363	106.435
ENSMUSG00000071568	Gm5874	FALSE	1.84394	3.58988	-1.31479	0.00138627	0.0911028	0.173516	0.366222	1.40235	0.146647	0.155169	0.233924
ENSMUSG00000021494	Ddx41	TRUE	0.242327	1.1829	6.24084	0.00145151	0.0940373	79.5281	79.0608	87.0877	67.2898	68.2081	72.1924
ENSMUSG00000025212	Sfxn3	TRUE	-0.537599	0.688917	3.76071	0.0014649	0.094573	12.3003	10.9005	9.76319	18.0166	15.0958	14.7372
ENSMUSG00000061979	Wbscr16	TRUE	0.367315	1.28995	4.89469	0.00149155	0.0959581	27.0685	34.1017	33.7452	24.2176	23.1646	26.1634
ENSMUSG00000031302	Nlgn3	TRUE	-0.573738	0.671874	3.22708	0.00151635	0.0968784	10.5459	7.36752	7.45553	12.9258	13.9431	10.9224
ENSMUSG00000064363	mt-Nd4	TRUE	-0.321045	0.80049	9.81963	0.00151209	0.0968784	849.437	844.852	824.085	1018.02	999.691	1128.29
ENSMUSG00000013629	Cad	TRUE	0.29802	1.22946	7.95817	0.00152835	0.0973083	261.045	271.112	324.813	226.485	237.764	232.826
ENSMUSG00000001467	Cyp51	TRUE	-0.231902	0.851512	7.83459	0.00155419	0.0986138	201.529	211.051	223.453	243.182	258.756	245.062
ENSMUSG00000044749	Abca6	TRUE	-1.61194	0.327159	-2.05234	0.00156355	0.0988676	0.0963976	0.0861698	0.0887563	0.335192	0.199504	0.3059
ENSMUSG00000018830	Myh11	TRUE	-1.17784	0.442013	-1.31419	0.00158212	0.0997007	0.269913	0.17234	0.248518	0.607536	0.53201	0.449853
ENSMUSG00000006369	Fbln1	TRUE	-0.230209	0.852511	6.84776	0.00159924	0.100437	114.193	108.897	111.087	142.603	121.786	127.614
ENSMUSG00000005481	Ddx39	TRUE	0.288095	1.22103	7.14971	0.00161314	0.100966	131.332	150.97	172.187	119.915	122.407	129.9
ENSMUSG00000056481	Cd248	TRUE	-0.560534	0.678051	4.23429	0.00163338	0.101545	17.7757	16.9539	10.5798	28.0514	19.2854	19.4516
ENSMUSG00000024608	Rps14	TRUE	0.373371	1.29538	9.26797	0.00163036	0.101545	502.502	643.344	706.216	460.973	444.073	524.672
ENSMUSG00000003438	Timm50	TRUE	0.265154	1.20176	6.42863	0.00164525	0.101598	80.01	92.611	99.3538	74.5593	73.2843	78.4544
ENSMUSG00000061577	Gpr114	TRUE	1.139	2.20228	-1.18045	0.00164261	0.101598	0.42415	0.775529	0.585792	0.167596	0.266005	0.359882
ENSMUSG00000049252	Lrp1b	TRUE	-1.08634	0.470956	-0.746775	0.00167352	0.103	0.501268	0.193882	0.390528	1.04748	0.665012	0.629794
ENSMUSG00000048070	Pirt	TRUE	-1.38598	0.382628	-1.15847	0.00168919	0.103619	0.40487	0.193882	0.124259	0.817031	0.731513	0.359882
ENSMUSG00000022901	Cd86	TRUE	-0.91916	0.528817	-0.394637	0.00170978	0.104189	0.42415	0.560104	0.497035	1.06843	0.75368	0.971682
ENSMUSG00000022521	Crebbp	TRUE	-0.321254	0.800374	6.35826	0.00170843	0.104189	89.6305	67.1478	76.863	101.081	101.836	89.0889
ENSMUSG00000054932	Afp	TRUE	3.60731	12.1873	-2.26506	0.00173379	0.105305	1.58092	0.280052	0	0.041899	0.0886683	0.0179941
ENSMUSG00000045763	Basp1	TRUE	-0.368585	0.774542	7.70492	0.00177763	0.107488	215.545	193.064	148.134	263.838	245.811	209.146
ENSMUSG00000004268	Emg1	TRUE	0.244225	1.18446	6.93403	0.00178137	0.107488	116.063	128.738	136.33	104.454	103.964	113.327
ENSMUSG00000024471	Myot	TRUE	-3.45184	0.0913886	-3.43745	0.0018345	0.107873	0.0192795	0	0	0.209495	0.0221671	0.0539824
ENSMUSG00000053399	Adamts18	TRUE	-1.05696	0.480645	2.7573	0.00182873	0.107873	5.37899	7.10901	2.02364	11.2708	11.2609	7.62951
ENSMUSG00000085555	2610035F20Rik	FALSE	-0.607956	0.656125	3.90435	0.00181613	0.107873	10.9893	9.82336	17.7335	22.6464	16.0933	20.0634
ENSMUSG00000033453	Adamts15	TRUE	-0.516092	0.699264	4.83644	0.00179407	0.107873	25.2947	21.3486	23.982	45.5652	25.5143	29.9422
ENSMUSG00000064337	mt-Rnr1	FALSE	-0.366756	0.775524	6.92928	0.00183292	0.107873	111.224	119.194	103.401	142.101	143.31	144.997
ENSMUSG00000022881	Rfc4	TRUE	0.291737	1.22411	6.21091	0.00182917	0.107873	66.7072	83.9079	77.5375	56.4589	62.5776	67.28
ENSMUSG00000029714	Gigyf1	TRUE	0.300859	1.23188	6.579	0.00181197	0.107873	96.6676	99.5692	101.786	78.8121	86.4959	76.6549
ENSMUSG00000053963	6330403A02Rik	TRUE	2.07466	4.21244	2.5547	0.00181446	0.107873	1.25317	4.69626	15.2838	1.34077	0.554177	3.13098
ENSMUSG00000056919	4922501C03Rik	TRUE	-0.235861	0.849178	6.16788	0.00184636	0.107884	75.2866	65.0151	66.585	79.9014	83.3704	80.3977
ENSMUSG00000035202	Lars2	TRUE	0.663878	1.58434	8.52063	0.00184539	0.107884	200.507	397.372	335.126	209.747	167.871	211.251
ENSMUSG00000044177	Wfikkn2	TRUE	-0.924349	0.526918	1.53984	0.00185224	0.107886	2.48706	1.70185	2.20116	5.74017	3.30289	3.11298
ENSMUSG00000027160	Ccdc34	TRUE	-0.338875	0.790657	6.46215	0.0018754	0.108891	110.703	77.0143	81.0878	106.193	120.168	113.651
ENSMUSG00000022206	Npr3	TRUE	-0.516676	0.69898	3.97388	0.00191042	0.109207	12.8594	12.5377	11.3076	22.835	14.7633	14.9171
ENSMUSG00000006398	Cdc20	TRUE	0.225942	1.16954	7.48919	0.00190042	0.109207	185.392	192.891	196.95	160.117	156.367	175.299
ENSMUSG00000015112	Slc25a13	TRUE	0.329361	1.25646	5.81391	0.00190902	0.109207	59.2267	62.4516	69.7625	46.2775	51.4498	54.6301
ENSMUSG00000026817	Ak1	TRUE	0.517753	1.43172	3.68513	0.00189779	0.109207	17.4673	12.0207	13.6507	11.1242	8.48999	10.5086
ENSMUSG00000062382	Gm10116	TRUE	1.96727	3.91027	0.179005	0.00189623	0.109207	0.616945	5.96726	0.514787	0.85893	0.443341	0.503835
ENSMUSG00000033918	Parl	TRUE	0.287628	1.22063	5.64412	0.00191792	0.109298	53.3272	54.0716	57.4963	41.1658	46.9055	47.0186
ENSMUSG00000026167	Wnt10a	TRUE	-1.19452	0.436931	-1.09384	0.00197028	0.110435	0.40487	0.323137	0.0887563	0.712283	0.642845	0.503835
ENSMUSG00000067719	Gm10221	TRUE	-0.864434	0.549262	0.226619	0.00195531	0.110435	0.944697	0.646274	1.11833	1.73881	1.9507	1.29558
ENSMUSG00000053199	Arhgap20	TRUE	-0.751838	0.593847	3.65947	0.00196296	0.110435	14.4789	9.09092	6.39045	21.2847	16.6696	12.5059
ENSMUSG00000048583	Igf2	TRUE	-0.34913	0.785057	8.86952	0.00197974	0.110435	427.292	427.424	369.599	630.036	463.336	466.138
ENSMUSG00000020723	Cacng4	TRUE	-0.324199	0.798742	6.29565	0.0019637	0.110435	88.6666	67.3417	67.9518	99.7616	95.2076	85.4721
ENSMUSG00000022503	Nubp1	TRUE	0.324426	1.25217	4.44814	0.00195652	0.110435	22.345	23.1151	22.8991	17.9747	18.6647	17.9581
ENSMUSG00000053801	Grwd1	TRUE	0.361131	1.28443	5.94424	0.00197566	0.110435	55.2358	64.412	80.0227	47.9744	51.4498	56.0337
ENSMUSG00000053175	Bcl3	TRUE	-1.32975	0.397837	-1.70336	0.00199801	0.111118	0.212075	0.150797	0.0710051	0.335192	0.354673	0.395871
ENSMUSG00000057506	Bloc1s2a	TRUE	0.328818	1.25598	4.8474	0.00201198	0.111559	30.7508	31.0858	29.0943	24.6576	22.3444	25.3537
ENSMUSG00000036782	Klhl13	TRUE	-0.273376	0.827381	6.09308	0.00202475	0.111931	67.6519	57.0013	59.3425	80.1109	68.9618	73.326
ENSMUSG00000020218	Wif1	TRUE	-1.23804	0.423948	1.52146	0.00204305	0.111937	2.42922	2.06808	0.56804	5.11168	4.03441	2.78909
ENSMUSG00000052926	Rnaseh2a	TRUE	0.258638	1.19635	5.89944	0.00203264	0.111937	61.1354	68.4404	64.8276	50.9911	54.0655	57.3832
ENSMUSG00000036395	Glb1l2	TRUE	0.471502	1.38655	3.12388	0.00203706	0.111937	9.38913	9.90953	11.0945	6.641	8.13532	7.16166
ENSMUSG00000026556	Vangl2	TRUE	-0.236527	0.848786	7.73204	0.00205905	0.11248	210.995	199.052	205.258	242.868	255.121	227.014
ENSMUSG00000020814	Mxra7	TRUE	-0.453935	0.730049	4.06233	0.00208893	0.113441	11.8184	10.7281	15.1418	17.011	17.0686	17.5982
ENSMUSG00000039831	Arhgap29	TRUE	-0.303591	0.810233	6.16192	0.0020863	0.113441	76.2313	63.1194	58.1176	85.3693	84.0797	74.2977
ENSMUSG00000022297	Fzd6	TRUE	-0.418505	0.7482	3.91319	0.00212012	0.114798	12.7438	11.3313	11.6803	18.5822	14.2313	14.9891
ENSMUSG00000079470	Utp14b	TRUE	-0.410065	0.752589	4.75135	0.0021321	0.115108	28.5915	24.4076	19.5796	31.3614	33.6939	31.3637
ENSMUSG00000028150	Rorc	TRUE	-1.17807	0.441942	-0.851754	0.00216071	0.115594	0.366311	0.280052	0.355025	0.921779	0.90885	0.467847
ENSMUSG00000022665	Ccdc80	TRUE	-0.671471	0.627866	3.76479	0.00216614	0.115594	9.56265	13.8518	8.16558	23.1492	13.4554	13.6575
ENSMUSG00000021835	Bmp4	TRUE	-0.57205	0.67266	4.38662	0.00216393	0.115594	16.4454	15.1874	19.3311	33.9382	17.645	24.2021
ENSMUSG00000084370	Gm15442	FALSE	3.92165	15.1543	-2.73339	0.00216	0.115594	0.963976	0.0215425	0.0177513	0	0.0221671	0.0359882
ENSMUSG00000074884	Serf2	TRUE	-0.381953	0.767398	4.85031	0.00217262	0.115606	23.5789	26.5188	26.4671	38.3376	33.8048	27.675
ENSMUSG00000053286	Trmt1l	TRUE	-0.259038	0.835645	5.60682	0.0021845	0.115904	43.1861	46.7902	44.5024	54.8039	53.1123	52.9927
ENSMUSG00000059552	Trp53	TRUE	0.253261	1.1919	7.12046	0.00221693	0.117176	135.651	145.907	171.726	123.435	125.355	131.537
ENSMUSG00000061046	Haghl	TRUE	0.37095	1.2932	4.68881	0.00222116	0.117176	27.7047	29.9656	29.5736	22.5207	24.1843	20.7832
ENSMUSG00000058656	Samd12	TRUE	-0.867406	0.548132	0.121927	0.00228812	0.120364	0.82902	0.495477	0.710051	0.942728	1.59603	1.20561
ENSMUSG00000018160	Med1	TRUE	0.198336	1.14737	7.11495	0.0022984	0.120438	151.923	149.462	153.122	129.217	135.419	131.519
ENSMUSG00000028370	Pappa	TRUE	0.460862	1.37636	5.26054	0.00230257	0.120438	39.4459	37.57	47.3249	22.4788	37.4845	30.4101
ENSMUSG00000061330	Gm11361	FALSE	-0.915622	0.530115	0.887814	0.00232544	0.121291	2.52562	1.50797	1.02957	4.08516	2.85955	2.60915
ENSMUSG00000029231	Pdgfra	TRUE	-0.402731	0.756425	6.48494	0.00236649	0.122053	67.2856	89.7674	59.1472	112.394	80.1561	93.1735
ENSMUSG00000023067	Cdkn1a	TRUE	0.774883	1.71105	4.01115	0.00235482	0.122053	32.3125	18.9358	13.7217	13.7219	12.7682	11.4802
ENSMUSG00000031962	Cdh15	TRUE	1.51361	2.85524	-1.69042	0.00235704	0.122053	0.347032	0.387764	0.408279	0.125697	0.0221671	0.233924
ENSMUSG00000026535	Ifi202b	TRUE	5.52753	46.1266	-3.8807	0.00236325	0.122053	0.327752	0	0	0	0	0
ENSMUSG00000051727	Kctd14	TRUE	-1.04973	0.483057	-0.43799	0.00237696	0.122251	0.578386	0.430849	0.479284	1.46647	0.842349	0.791741
ENSMUSG00000081855	Rpl17-ps5	FALSE	-1.04322	0.485244	-0.852702	0.00239951	0.123068	0.443429	0.409307	0.390528	1.23602	0.576344	0.755753
ENSMUSG00000025469	Msx3	TRUE	-1.12816	0.457498	-1.16562	0.00244276	0.124756	0.231354	0.215425	0.390528	0.649435	0.75368	0.467847
ENSMUSG00000026586	Prrx1	TRUE	-0.314291	0.804246	6.35273	0.00244593	0.124756	80.8198	82.4214	65.4312	102.276	92.0377	89.9706
ENSMUSG00000022103	Gfra2	TRUE	-0.799227	0.574657	0.350203	0.00246711	0.125328	0.771181	0.904783	0.763304	1.44552	1.06402	1.70944
ENSMUSG00000020307	Cdc34	TRUE	0.257329	1.19526	6.91626	0.00247072	0.125328	127.226	124.752	140.697	103.972	104.429	120.093
ENSMUSG00000008859	Rala	TRUE	-0.245141	0.843733	6.71332	0.00250608	0.126773	109.681	103.167	88.6853	114.95	123.604	118.779
ENSMUSG00000038429	Usp5	TRUE	0.235904	1.17764	7.65741	0.00252263	0.127262	199.967	209.436	238.968	184.879	180.994	184.728
ENSMUSG00000058669	Nkx2-9	TRUE	3.43679	10.8287	-1.5408	0.00253168	0.12737	0.0192795	0.0646274	1.08283	0	0.0665012	0.0359882
ENSMUSG00000057058	Skap1	TRUE	-0.956642	0.515255	-0.140451	0.0026331	0.132113	0.42415	0.538561	0.798807	1.31982	0.931017	1.18761
ENSMUSG00000045114	Prrt2	TRUE	-0.781936	0.581586	0.824427	0.00264517	0.132359	1.36885	1.07712	1.3846	2.76534	1.8842	1.96136
ENSMUSG00000019590	Cyb561	TRUE	-0.637025	0.643038	3.24863	0.00265442	0.132463	4.62709	5.5795	9.1774	9.59488	9.26584	11.3183
ENSMUSG00000049353	Rd3	TRUE	-1.34309	0.394175	-1.80691	0.00268206	0.132765	0.192795	0.107712	0.0887563	0.335192	0.399007	0.269912
ENSMUSG00000018102	Hist1h2bc	TRUE	-0.617032	0.652011	1.81666	0.00268166	0.132765	3.14256	2.60664	2.52068	4.148	4.36691	4.17464
ENSMUSG00000020549	Elac2	TRUE	0.273908	1.20908	5.74221	0.00267736	0.132765	54.1755	58.1431	64.2596	47.4716	49.1222	49.4658
ENSMUSG00000063696	Gm8730	TRUE	0.532846	1.44678	2.58805	0.00269963	0.133278	7.21054	6.35503	6.90524	4.58794	4.47775	5.07434
ENSMUSG00000049538	Adamts16	TRUE	-1.18935	0.438499	-1.0138	0.00273144	0.134489	0.289193	0.17234	0.28402	0.921779	0.354673	0.449853
ENSMUSG00000029513	Prkab1	TRUE	0.243708	1.18403	5.61489	0.00274271	0.134685	53.5585	54.2008	53.3958	45.7956	45.3982	44.9133
ENSMUSG00000038259	Gdf5	TRUE	-1.41684	0.374533	-0.697096	0.00276906	0.135553	0.462709	0.193882	0.319523	1.59216	0.354673	0.683776
ENSMUSG00000018761	Mpdu1	TRUE	0.244664	1.18482	5.68038	0.00277508	0.135553	51.3414	54.1577	55.0644	44.3711	44.7775	46.3528
ENSMUSG00000071540	3425401B19Rik	TRUE	3.42528	10.7427	-3.29435	0.00279785	0.136305	0	0.0861698	0.195264	0	0	0.0179941
ENSMUSG00000022437	Samm50	TRUE	0.236147	1.17784	6.57439	0.00281077	0.136574	90.768	104.567	108.602	85.914	84.2349	87.8833
ENSMUSG00000061517	Sox21	TRUE	0.360676	1.28403	5.78808	0.00282095	0.136709	68.7122	65.0151	58.2596	40.9772	59.6294	48.926
ENSMUSG00000095115	Itpripl2	TRUE	-0.426237	0.744201	4.11324	0.00284297	0.137415	16.7925	14.5412	11.9999	22.2484	18.7755	17.2024
ENSMUSG00000019929	Dcn	TRUE	-1.13943	0.453939	2.45196	0.00285956	0.137497	5.88026	3.57605	1.82838	12.444	6.69446	5.72213
ENSMUSG00000054409	Tmem74	TRUE	-0.642257	0.64071	1.40211	0.00285508	0.137497	1.98579	1.37872	1.91714	2.87008	2.59355	2.80708
ENSMUSG00000080242	Gm15487	FALSE	-0.9795	0.507156	-0.420742	0.00287307	0.137788	0.597665	0.517019	0.585792	1.34077	1.28569	0.755753
ENSMUSG00000018669	Cdk5rap3	TRUE	0.245576	1.18557	5.77661	0.00288625	0.138061	55.6793	58.7247	59.4667	46.2984	50.8956	49.4658
ENSMUSG00000003949	Hlf	TRUE	-0.785682	0.580078	1.25301	0.00289928	0.138326	1.31101	1.78802	1.79288	3.60332	2.37188	2.46519
ENSMUSG00000039509	Nup133	TRUE	0.209207	1.15605	7.03838	0.00292904	0.139386	131.949	139.509	150.779	118.197	122.229	124.825
ENSMUSG00000036781	Rps27l	TRUE	0.321952	1.25002	6.56676	0.00294919	0.139687	79.8558	103.296	108.265	72.3596	77.0527	83.6906
ENSMUSG00000025592	Dach2	TRUE	0.988122	1.9836	2.95104	0.0029505	0.139687	4.43429	5.5795	10.846	2.61869	3.5024	4.39056
ENSMUSG00000029036	Atad3a	TRUE	0.258667	1.19637	6.37352	0.00295983	0.139771	79.4317	88.518	100.685	72.2339	77.6734	74.6756
ENSMUSG00000084168	Atp5l2	FALSE	-1.63937	0.320996	-1.78411	0.00297189	0.139794	0.269913	0.107712	0.0710051	0.314243	0.687179	0.413865
ENSMUSG00000066705	Fxyd6	TRUE	0.274633	1.20969	6.62762	0.00297547	0.139794	92.8309	101.206	119.288	85.2436	82.9048	90.8703
ENSMUSG00000020812	1810032O08Rik	TRUE	0.476224	1.3911	3.39937	0.0029925	0.140237	8.86858	11.396	13.1892	8.08651	8.09098	7.88142
ENSMUSG00000051428	Gm5644	FALSE	-0.66545	0.630492	1.51167	0.00303349	0.141799	3.21968	1.98191	2.37867	4.08516	4.16741	3.79676
ENSMUSG00000094272	Gm22292	FALSE	-1.9538	0.258136	-3.26887	0.00318082	0.142483	0.0963976	0	0.0355025	0.167596	0.177337	0.197935
ENSMUSG00000000318	Clec10a	TRUE	-1.94699	0.259356	-2.67133	0.00319474	0.142483	0.0771181	0.0215425	0.0177513	0.188546	0.199504	0.0899706
ENSMUSG00000034151	Zbbx	TRUE	-1.50267	0.352899	-2.3432	0.00316315	0.142483	0.0771181	0.0430849	0.106508	0.272344	0.243838	0.161947
ENSMUSG00000042254	Cilp	TRUE	-1.1173	0.460955	-0.101904	0.00318225	0.142483	0.751902	0.581646	0.461533	1.73881	1.17485	0.989676
ENSMUSG00000043639	Rbm20	TRUE	-0.99537	0.501607	3.27741	0.00311134	0.142483	8.1938	9.97416	2.60944	16.173	14.2756	10.9404
ENSMUSG00000062632	Gm12588	TRUE	-0.83879	0.559112	-0.177915	0.00316775	0.142483	0.597665	0.517019	0.603543	0.900829	1.24136	0.953688
ENSMUSG00000044341	Gm5601	FALSE	-0.58034	0.668806	1.44403	0.00306069	0.142483	2.21715	2.34813	2.52068	3.51952	3.5024	3.58083
ENSMUSG00000021643	Serf1	TRUE	-0.366454	0.775686	3.955	0.00313928	0.142483	14.7296	13.3779	13.6862	17.9118	18.975	17.0224
ENSMUSG00000064345	mt-Nd2	TRUE	-0.334799	0.792895	10.3529	0.0031388	0.142483	1329.71	1208.81	1233.64	1437.09	1576.85	1743.49
ENSMUSG00000045103	Dmd	TRUE	-0.32194	0.799993	4.80134	0.00313614	0.142483	27.7818	23.9983	26.1654	30.3558	34.891	32.2275
ENSMUSG00000066456	Hmgn3	TRUE	-0.241159	0.846065	6.01768	0.00311736	0.142483	70.4088	61.7622	56.9816	73.847	75.5675	74.1358
ENSMUSG00000001855	Nup214	TRUE	0.216903	1.16224	6.29249	0.00309617	0.142483	88.5894	81.8613	89.0581	74.7688	74.437	74.1178
ENSMUSG00000029547	Ints1	TRUE	0.224472	1.16835	6.79255	0.00314523	0.142483	119.109	112.861	123.851	104.58	99.8183	100.191
ENSMUSG00000076437	2700094K13Rik	TRUE	0.232205	1.17463	7.40286	0.00309964	0.142483	163.066	185.567	174.832	142.834	147.677	155.073
ENSMUSG00000033931	Rbm34	TRUE	0.309029	1.23887	5.09099	0.00317406	0.142483	38.5012	42.5033	34.5085	29.1617	32.5856	31.4537
ENSMUSG00000040952	Rps19	TRUE	0.340649	1.26633	9.21025	0.00319365	0.142483	487.117	645.304	681.631	473.208	465.841	493.471
ENSMUSG00000020902	Ntn1	TRUE	0.535032	1.44897	5.4652	0.00306812	0.142483	57.4916	49.2891	36.1238	26.7735	39.8564	31.9935
ENSMUSG00000086869	Gm7809	FALSE	1.93354	3.81992	0.334415	0.00313057	0.142483	7.28766	0.517019	0.692299	0.754182	0.709346	0.755753
ENSMUSG00000020264	Slc36a2	TRUE	2.1948	4.57826	-2.54652	0.00312213	0.142483	0.0963976	0.150797	0.319523	0.041899	0	0.0719765
ENSMUSG00000055053	Nfic	TRUE	-0.555936	0.680215	3.90121	0.00321555	0.143065	16.1755	11.913	9.65669	23.0026	15.5835	16.8965
ENSMUSG00000064367	mt-Nd5	TRUE	-0.335972	0.79225	10.4615	0.00324945	0.14382	1431.97	1237.18	1376.2	1570.54	1670.95	1864.66
ENSMUSG00000029545	Acads	TRUE	0.314298	1.24341	5.37185	0.00325692	0.14382	39.9857	46.5102	49.0112	36.6616	32.4526	39.821
ENSMUSG00000008668	Rps18	TRUE	0.35409	1.27818	9.60572	0.00324898	0.14382	670.561	807.756	938.19	600.79	608.996	680.789
ENSMUSG00000039450	Dcxr	TRUE	0.577186	1.49194	2.16036	0.00327034	0.14382	5.66818	5.75184	4.45557	3.93851	3.45806	3.23894
ENSMUSG00000005628	Tmod4	TRUE	0.920367	1.8926	0.48977	0.00327147	0.14382	2.06291	2.67126	1.11833	0.984627	1.08619	1.00767
ENSMUSG00000056306	Sertm1	TRUE	-0.917135	0.529559	2.74177	0.00328247	0.143961	6.24657	5.29944	3.83427	15.0208	6.51712	7.50355
ENSMUSG00000025203	Scd2	TRUE	-0.320126	0.801	10.7012	0.00331628	0.145099	1466.3	1496.94	1593.16	1953.37	1943.3	1791.76
ENSMUSG00000037940	Inpp4b	TRUE	-0.668959	0.62896	1.76037	0.00334116	0.145648	2.40994	3.05903	2.36092	5.32118	3.48023	3.63481
ENSMUSG00000028068	Iqgap3	TRUE	0.217775	1.16294	6.15623	0.0033446	0.145648	78.8533	79.3409	77.9103	66.2424	69.2499	67.5319
ENSMUSG00000049872	Fam26e	TRUE	-1.11428	0.46192	-1.59678	0.00336803	0.145979	0.212075	0.215425	0.177513	0.586586	0.310339	0.413865
ENSMUSG00000061669	Gm6404	FALSE	1.91359	3.76746	-2.41024	0.00336344	0.145979	0.212075	0.581646	0.14201	0.0837981	0.0443341	0.107965
ENSMUSG00000003070	Efna2	TRUE	-0.270241	0.829181	5.51211	0.00338856	0.146526	46.1359	39.9613	43.0291	51.5568	51.1616	53.0287
ENSMUSG00000020102	Slc16a7	TRUE	-0.612587	0.654023	1.65822	0.00340698	0.146978	3.23896	2.47738	2.64494	4.71364	4.27824	3.81475
ENSMUSG00000029730	Mcm7	TRUE	0.26554	1.20209	8.70419	0.00344439	0.148245	435.312	450.754	504.367	362.699	389.409	404.58
ENSMUSG00000044338	Aplnr	TRUE	-0.325533	0.798003	5.78264	0.00345912	0.148533	50.4738	51.4649	47.4491	75.2088	53.0236	58.9487
ENSMUSG00000031029	Eif3f	TRUE	0.205772	1.1533	7.62787	0.00351283	0.150489	208.604	218.139	215.092	193.532	182.568	180.427
ENSMUSG00000084088	Gm12941	FALSE	-0.855292	0.552753	0.125864	0.00356775	0.150783	0.771181	0.452392	1.01182	1.67596	1.28569	1.13363
ENSMUSG00000034488	Edil3	TRUE	-0.67112	0.628019	4.66251	0.00354852	0.150783	25.314	23.1366	11.7691	39.9298	27.5315	28.3947
ENSMUSG00000060419	Rps16-ps2	FALSE	-0.48633	0.713838	3.17231	0.00353502	0.150783	9.65904	8.03534	7.93481	13.3029	12.7017	9.93275
ENSMUSG00000027423	Snx5	TRUE	0.29279	1.22501	8.03791	0.00355492	0.150783	256.745	292.094	298.434	204.174	235.702	251.738
ENSMUSG00000022610	Mapk12	TRUE	0.381672	1.30285	5.64272	0.00356868	0.150783	49.0857	50.9048	66.0524	36.8921	41.1643	49.3759
ENSMUSG00000046818	Ddit4l	TRUE	0.54364	1.45765	3.11732	0.00354419	0.150783	13.6113	9.19863	8.96439	6.20106	8.11315	7.48555
ENSMUSG00000034647	Ankrd12	TRUE	-0.375579	0.770796	4.55283	0.00357922	0.150883	23.7717	21.2193	17.627	28.9313	26.9773	25.3177
ENSMUSG00000054580	Pla2r1	TRUE	-0.917824	0.529307	0.281752	0.00359545	0.151222	0.963976	0.775529	0.550289	1.92736	1.04185	1.34956
ENSMUSG00000090965	Gm17203	FALSE	-1.09529	0.468042	-1.36256	0.00362099	0.151504	0.212075	0.280052	0.159761	0.523738	0.509843	0.359882
ENSMUSG00000019470	Xab2	TRUE	0.210737	1.15728	6.23862	0.00362678	0.151504	79.4895	77.6821	85.0818	70.6208	68.6514	70.0871
ENSMUSG00000021041	2700073G19Rik	TRUE	0.934259	1.91091	-0.401224	0.00361167	0.151504	0.751902	1.0125	0.781056	0.41899	0.354673	0.539824
ENSMUSG00000030423	Pop4	TRUE	0.226806	1.17024	6.46716	0.00365049	0.15215	90.286	99.4615	92.8391	75.3554	82.927	83.1508
ENSMUSG00000021638	Ocln	TRUE	-0.860888	0.550613	1.2122	0.0037023	0.153137	1.63876	0.818613	2.55618	3.26812	2.61571	3.27493
ENSMUSG00000035493	Tgfbi	TRUE	-0.618803	0.651211	4.83842	0.003701	0.153137	26.8178	26.0233	13.0117	41.6686	30.2137	29.2045
ENSMUSG00000051037	Zfp455	TRUE	-0.602958	0.658403	1.30673	0.00370735	0.153137	2.17859	2.11116	1.84613	3.47762	3.03689	2.80708
ENSMUSG00000027523	Gnas	TRUE	-0.448597	0.732755	3.66031	0.00369016	0.153137	10.6037	11.1805	10.4377	16.7387	14.2534	12.9918
ENSMUSG00000026678	Rgs5	TRUE	-1.04136	0.485869	0.756554	0.0037409	0.153153	1.13749	1.05558	1.04732	3.20528	2.06154	1.42154
ENSMUSG00000037206	Islr	TRUE	-0.801626	0.573702	2.61538	0.00372352	0.153153	5.97665	4.30849	2.75145	9.80437	6.56145	6.35192
ENSMUSG00000081998	Gm13245	FALSE	0.748116	1.6796	0.081482	0.0037261	0.153153	1.06037	1.29255	1.13608	0.670384	0.798015	0.6118
ENSMUSG00000092827	Mir3091	FALSE	2.07012	4.19921	-3.09821	0.0037405	0.153153	0.0771181	0.193882	0.177513	0.041899	0.0221671	0.0359882
ENSMUSG00000019179	Mdh2	TRUE	0.216619	1.16201	7.76375	0.00379202	0.154561	224.992	234.791	248.322	202.309	200.013	207.058
ENSMUSG00000027434	Nkx2-2	TRUE	4.20387	18.4286	0.141449	0.00378803	0.154561	0.0385591	0.0215425	3.55025	0.041899	0	0.143953
ENSMUSG00000029009	Mthfr	TRUE	0.209841	1.15656	6.13569	0.00380681	0.154822	72.5296	72.2965	72.6027	60.8793	61.7796	65.3007
ENSMUSG00000020153	Ndufs7	TRUE	0.299461	1.23068	5.29047	0.00381946	0.154995	35.3201	44.5713	42.319	33.8963	31.9649	33.4151
ENSMUSG00000001911	Nfix	TRUE	-1.37432	0.385735	3.84602	0.00388643	0.155168	16.8889	8.59544	2.1479	28.1771	27.8418	15.6189
ENSMUSG00000001506	Col1a1	TRUE	-0.773551	0.584976	7.03977	0.00390575	0.155168	116.371	117.579	54.3189	241.674	125.111	125.977
ENSMUSG00000068551	Zfp467	TRUE	-0.442145	0.73604	4.61295	0.00390794	0.155168	23.8295	22.8996	16.7572	31.5709	28.1522	26.5053
ENSMUSG00000026004	Kansl1l	TRUE	-0.366545	0.775638	4.09188	0.00393058	0.155168	15.1923	16.2646	13.0294	20.0906	19.0415	18.1921
ENSMUSG00000025255	Zfhx4	TRUE	-0.316709	0.802899	7.26097	0.00390119	0.155168	169.294	135.481	121.49	188.881	175.962	166.068
ENSMUSG00000031591	Asah1	TRUE	-0.209368	0.864916	6.16934	0.00389144	0.155168	69.3099	70.5731	64.4016	81.7031	77.5626	76.8889
ENSMUSG00000024767	Otub1	TRUE	0.195152	1.14484	7.08971	0.00385807	0.155168	137.386	144.421	154.756	127.038	124.557	129.738
ENSMUSG00000026955	Sapcd2	TRUE	0.266071	1.20253	5.26556	0.00390536	0.155168	42.5885	43.882	39.6563	34.9857	35.423	34.4587
ENSMUSG00000031657	Heatr3	TRUE	0.276718	1.21144	6.24694	0.00393297	0.155168	75.2673	94.119	86.3599	65.7186	70.2253	75.1074
ENSMUSG00000024911	Fibp	TRUE	0.293043	1.22522	4.97411	0.00392423	0.155168	33.4693	34.6403	31.9523	28.1771	27.5093	25.9835
ENSMUSG00000059534	Uqcr10	TRUE	0.306765	1.23693	5.93451	0.00390252	0.155168	50.1268	65.5322	70.153	48.3096	50.4079	51.4992
ENSMUSG00000046997	Spsb4	TRUE	0.329672	1.25673	5.67872	0.00386578	0.155168	47.9482	53.296	60.9046	37.9815	43.0706	47.9543
ENSMUSG00000088171	Gm25220	FALSE	1.24975	2.378	-1.7804	0.00383744	0.155168	0.327752	0.301594	0.42603	0.104748	0.133002	0.197935
ENSMUSG00000070780	Rbm47	TRUE	-1.24119	0.423024	1.41562	0.00396123	0.155287	1.90867	0.624731	2.27216	6.68289	1.66253	3.059
ENSMUSG00000031790	Mmp15	TRUE	-0.256169	0.837308	5.63158	0.00395261	0.155287	47.2156	44.1405	48.745	58.9729	55.0408	53.3706
ENSMUSG00000035242	Oaz1	TRUE	0.244479	1.18467	8.04741	0.00395885	0.155287	243.558	283.563	299.215	229.418	225.328	242.759
ENSMUSG00000038034	Igsf8	TRUE	-0.441318	0.736461	5.8625	0.00397396	0.155456	55.5443	57.863	39.2303	81.5146	65.5037	60.2083
ENSMUSG00000033306	Lpp	TRUE	-0.24635	0.843027	5.90234	0.00402134	0.156977	55.7564	50.754	54.4786	69.7409	61.691	59.5965
ENSMUSG00000031803	B3gnt3	TRUE	-0.867628	0.548047	-0.374735	0.00403669	0.157243	0.520547	0.452392	0.461533	0.817031	0.731513	1.06165
ENSMUSG00000025809	Itgb1	TRUE	-0.221925	0.857421	8.03352	0.00411233	0.159517	256.823	249.483	238.772	309.571	277.643	281.752
ENSMUSG00000091421	Gm4202	FALSE	0.298222	1.22963	5.14133	0.00411141	0.159517	47.4662	37.3977	44.0054	34.3991	36.0437	34.4048
ENSMUSG00000028456	Unc13b	TRUE	-0.239714	0.846913	6.54019	0.00416608	0.160984	90.1511	84.9419	90.0522	113.358	98.6213	101.127
ENSMUSG00000030641	4632434I11Rik	TRUE	0.296319	1.22801	5.3	0.00416758	0.160984	42.3186	45.7777	39.7983	32.8698	32.7629	38.4354
ENSMUSG00000026875	Traf1	TRUE	-2.11195	0.231333	-2.75268	0.0041921	0.161593	0.0385591	0.0646274	0.0177513	0.251394	0.177337	0.107965
ENSMUSG00000080006	Rps19-ps7	FALSE	-1.55686	0.339891	-1.98256	0.00423726	0.162993	0.192795	0.0861698	0.0887563	0.544687	0.421174	0.143953
ENSMUSG00000036985	Zdhhc9	TRUE	-0.275023	0.826437	5.13504	0.00428198	0.164371	33.315	31.3443	33.4966	40.244	40.2776	38.2915
ENSMUSG00000044576	Gareml	TRUE	-0.522271	0.696275	3.85884	0.00431133	0.165054	12.3389	11.5252	11.13	20.8238	14.4529	14.9891
ENSMUSG00000024975	Pdcd4	TRUE	-0.476992	0.718474	5.85569	0.00432659	0.165054	52.5753	62.0423	33.7629	74.9574	71.8656	59.6505
ENSMUSG00000032091	Tmprss4	TRUE	5.039	32.8768	-4.06343	0.00432581	0.165054	0.231354	0	0	0	0	0
ENSMUSG00000036111	Lmo1	TRUE	0.541349	1.45533	4.51089	0.00437179	0.166434	24.1187	22.081	21.1773	12.7583	18.3765	15.169
ENSMUSG00000036169	Sostdc1	TRUE	-1.08834	0.470301	1.3623	0.0044051	0.167014	0.655504	1.78802	2.44967	5.11168	1.90637	3.40089
ENSMUSG00000034990	Otoa	TRUE	1.29503	2.45382	-1.74863	0.0044018	0.167014	0.385591	0.366222	0.213015	0.0837981	0.199504	0.107965
ENSMUSG00000008575	Nfib	TRUE	-0.651846	0.636466	6.22183	0.00443741	0.167894	82.9405	71.1117	36.7806	108.12	113.407	78.2924
ENSMUSG00000027560	Dok5	TRUE	-0.755798	0.592219	1.2015	0.00445185	0.168096	2.08219	2.11116	1.15383	3.20528	3.5689	2.24926
ENSMUSG00000085006	BC021767	FALSE	-1.0364	0.487543	-0.588265	0.00446608	0.168289	0.539827	0.301594	0.479284	1.08937	0.665012	0.971682
ENSMUSG00000091415	Akd1	TRUE	-1.03076	0.489452	-1.48086	0.00449387	0.168991	0.289193	0.215425	0.230766	0.628485	0.37684	0.503835
ENSMUSG00000002985	Apoe	TRUE	-0.318063	0.802146	5.38898	0.00453104	0.170043	33.0451	36.3206	36.6741	52.1224	38.1274	41.9443
ENSMUSG00000004263	Atn1	TRUE	-0.252872	0.839224	7.09806	0.00459436	0.17207	144.77	118.85	134.377	164.956	159.913	149.459
ENSMUSG00000045871	Slitrk6	TRUE	-1.1985	0.435728	-0.641238	0.00464148	0.172435	0.327752	0.25851	0.461533	1.17317	0.443341	0.809735
ENSMUSG00000022321	Cdh10	TRUE	-0.656086	0.634598	1.99028	0.00463981	0.172435	3.79807	3.31754	2.92896	6.49435	5.20926	4.13865
ENSMUSG00000025326	Ube3a	TRUE	-0.232107	0.85139	6.73918	0.0046161	0.172435	111.686	94.8084	96.9041	112.583	124.756	119.049
ENSMUSG00000095993	Gm21060	TRUE	1.42714	2.68914	-2.10128	0.00462496	0.172435	0.231354	0.301594	0.390528	0.041899	0.110835	0.179941
ENSMUSG00000054836	Elp6	TRUE	0.316012	1.24488	4.59136	0.00465753	0.172684	23.521	26.9065	25.8991	19.8811	20.3937	21.0171
ENSMUSG00000021613	Hapln1	TRUE	-0.318163	0.80209	6.39689	0.00466696	0.172687	84.213	82.4861	70.65	103.512	98.3996	93.9833
ENSMUSG00000073838	Tufm	TRUE	0.254839	1.1932	6.72861	0.00470118	0.173605	102.336	113.119	133.01	93.8538	94.9416	103.25
ENSMUSG00000051817	Sox12	TRUE	-0.231833	0.851553	7.43309	0.00471609	0.173808	187.705	159.479	150.069	196.444	191.878	195.596
ENSMUSG00000074505	Fat3	TRUE	-0.327035	0.797173	6.2452	0.00473678	0.174223	76.8096	62.667	64.2418	89.5592	87.2718	78.7603
ENSMUSG00000050966	Lin28a	TRUE	1.01513	2.02109	5.32609	0.00475212	0.17444	27.8975	35.2435	86.8392	15.754	22.1671	36.2761
ENSMUSG00000068262	Gm5879	FALSE	-1.08898	0.470095	-1.37593	0.00476886	0.174582	0.289193	0.215425	0.230766	0.586586	0.465508	0.521829
ENSMUSG00000030225	Dera	TRUE	0.34383	1.26912	4.71472	0.00477492	0.174582	30.8087	27.639	29.8576	21.2428	22.7656	25.5516
ENSMUSG00000068742	Cry2	TRUE	0.286891	1.22001	4.95057	0.00478442	0.174584	32.7174	33.9509	36.3723	29.3712	26.7113	28.3767
ENSMUSG00000041328	Pcf11	TRUE	-0.194904	0.873631	6.60388	0.00480849	0.175116	89.3028	92.2879	90.8155	99.154	107.488	105.158
ENSMUSG00000013465	Nelfb	TRUE	0.201466	1.14987	6.65557	0.00482246	0.175279	99.5402	104.459	109.437	87.7575	92.1263	92.7057
ENSMUSG00000035133	Arhgap5	TRUE	-0.201162	0.869849	7.30408	0.00483808	0.175501	150.727	155.817	143.395	164.558	176.627	176.018
ENSMUSG00000096971	AC158921.1	FALSE	-0.70896	0.611761	1.02845	0.00486651	0.175749	1.90867	1.80957	1.15383	3.31002	2.50488	2.1413
ENSMUSG00000038400	Pmepa1	TRUE	-0.363813	0.777108	3.87542	0.00487062	0.175749	13.8427	12.9039	12.0886	17.7023	17.0465	15.241
ENSMUSG00000054452	Aes	TRUE	-0.234021	0.850262	7.23102	0.00487347	0.175749	154.41	135.007	126.602	174.824	154.926	159.518
ENSMUSG00000018428	Akap1	TRUE	0.269123	1.20508	5.56225	0.00490025	0.176151	48.2759	51.0341	57.3188	41.061	44.1568	44.7694
ENSMUSG00000027737	Slc7a11	TRUE	1.00328	2.00455	3.12505	0.00490369	0.176151	8.92642	27.7251	6.47921	6.99714	7.73631	6.76579
ENSMUSG00000071550	Wdr52	TRUE	-0.621388	0.650045	1.91803	0.00497551	0.177271	3.35464	2.95132	2.99996	5.50972	4.94326	3.88673
ENSMUSG00000044783	Hjurp	TRUE	-0.24489	0.84388	9.10668	0.0049817	0.177271	444.162	488.82	472.681	544.792	564.529	556.378
ENSMUSG00000041375	Ccdc9	TRUE	0.214405	1.16022	5.86374	0.00498286	0.177271	58.9568	63.1194	63.5495	52.3528	53.5556	54.0723
ENSMUSG00000037313	Tacc3	TRUE	0.214657	1.16043	7.72449	0.00496122	0.177271	212.268	232.185	238.666	184.817	194.871	208.948
ENSMUSG00000079575	Rbpsuh-rs3	FALSE	1.69033	3.22731	0.41376	0.00497391	0.177271	6.67072	0.538561	0.798807	0.85893	0.75368	0.863718
ENSMUSG00000027080	Med19	TRUE	-0.238789	0.847456	5.62014	0.00500159	0.177595	49.7797	46.7687	44.4314	54.0916	56.3044	55.9437
ENSMUSG00000032561	Acpp	TRUE	1.08806	2.12588	-1.21187	0.0050568	0.179211	0.462709	0.366222	0.621294	0.167596	0.221671	0.287906
ENSMUSG00000097052	AL732311.1	FALSE	0.31523	1.24421	4.80244	0.00506764	0.179251	27.6468	27.2081	33.0884	23.652	23.7631	23.3024
ENSMUSG00000026043	Col3a1	TRUE	-0.496512	0.708818	9.26334	0.00512291	0.180859	633.275	541.297	371.729	926.765	643.155	611.584
ENSMUSG00000032303	Chrna3	TRUE	-0.370378	0.77358	3.87628	0.00513517	0.180946	14.7296	13.184	11.6803	16.8434	18.1105	16.2307
ENSMUSG00000090266	Mettl23	TRUE	-0.328181	0.79654	4.41941	0.00516701	0.181721	15.2501	19.3667	15.9584	20.6143	22.0562	20.7832
ENSMUSG00000079197	Psme2	TRUE	0.247078	1.1868	5.31321	0.00526541	0.184722	40.1978	41.9647	41.3072	34.0849	34.1151	35.8083
ENSMUSG00000074607	Tox2	TRUE	0.458329	1.37395	4.71787	0.00527233	0.184722	23.5403	27.0358	33.9227	18.2889	20.6819	22.5286
ENSMUSG00000045679	Pqlc3	TRUE	0.695279	1.6192	1.89407	0.00528527	0.184824	5.88026	5.47178	3.30173	3.39382	2.61571	3.02301
ENSMUSG00000028741	Mrto4	TRUE	0.265798	1.2023	6.2496	0.00530089	0.18502	71.8934	81.1289	90.7977	63.7075	66.8116	72.2644
ENSMUSG00000022177	Haus4	TRUE	0.281323	1.21531	4.97273	0.00533	0.185685	32.6595	35.0927	35.7688	28.8475	27.7532	28.5747
ENSMUSG00000070732	Rbm44	TRUE	-1.48127	0.358172	-1.48392	0.00542164	0.188057	0.366311	0.236967	0	0.796082	0.354673	0.521829
ENSMUSG00000064370	mt-Cytb	TRUE	-0.361792	0.778198	11.525	0.00544902	0.188057	3131.67	2626.95	2579.24	3360.8	3513.53	3839.98
ENSMUSG00000026158	Ogfrl1	TRUE	-0.331109	0.794925	4.81065	0.00544417	0.188057	29.7676	28.8454	22.9701	34.3782	36.0215	32.2095
ENSMUSG00000029480	Dhx37	TRUE	0.253959	1.19247	5.48413	0.005439	0.188057	48.5651	47.6304	53.9283	41.2915	40.5879	44.0136
ENSMUSG00000031832	Taf1c	TRUE	0.326999	1.2544	4.28927	0.00543381	0.188057	20.4941	19.9914	22.3311	17.4509	15.2731	17.3463
ENSMUSG00000034997	Htr2a	TRUE	-1.22251	0.428535	-1.82003	0.00548651	0.188533	0.154236	0.107712	0.14201	0.377091	0.37684	0.215929
ENSMUSG00000047414	Flrt2	TRUE	-0.471481	0.721224	5.80548	0.00548795	0.188533	40.1785	40.9091	53.1295	78.9797	43.3588	63.7712
ENSMUSG00000026278	Bok	TRUE	0.354078	1.27817	4.48699	0.00549343	0.188533	20.8604	22.7488	28.473	19.5459	19.6622	17.2384
ENSMUSG00000022148	Fyb	TRUE	-0.606011	0.657011	1.00063	0.0055713	0.188791	1.5038	1.70185	1.4556	2.61869	2.37188	2.10531
ENSMUSG00000070304	Scn2b	TRUE	-0.408887	0.753204	3.35189	0.00557037	0.188791	8.83002	8.78932	8.53836	11.4384	10.485	12.7758
ENSMUSG00000030016	Zfml	TRUE	-0.204393	0.867904	7.83487	0.00556173	0.188791	210.59	219.453	208.222	231.723	252.017	251.63
ENSMUSG00000023018	Smarcd1	TRUE	0.189518	1.14038	7.61537	0.00555	0.188791	218.591	212.753	216.139	188.797	189.528	189.46
ENSMUSG00000046865	Fbl	TRUE	0.299268	1.23052	7.50164	0.00557328	0.188791	166.382	186.536	235.222	147.38	160.733	169.864
ENSMUSG00000028672	Hmgcl	TRUE	0.302199	1.23302	4.74612	0.00559296	0.188791	25.6996	28.8884	30.4789	23.254	22.2114	23.5183
ENSMUSG00000022454	Nell2	TRUE	0.391561	1.31181	5.94344	0.0055452	0.188791	70.698	68.2681	54.0703	43.8054	53.6665	49.6638
ENSMUSG00000019761	Krt10	TRUE	0.435112	1.35202	2.96161	0.0055204	0.188791	9.62048	9.37097	8.62711	6.99714	7.2708	6.17198
ENSMUSG00000081418	Gm14830	FALSE	1.19343	2.28696	-1.76763	0.00558805	0.188791	0.231354	0.301594	0.390528	0.0837981	0.110835	0.197935
ENSMUSG00000073705	Apitd1	TRUE	0.313054	1.24233	4.59947	0.00561628	0.18913	24.3115	25.7002	28.331	20.1534	19.7952	23.0865
ENSMUSG00000049123	Catsperg2	TRUE	2.18506	4.54746	-3.22749	0.00562351	0.18913	0.173516	0.215425	0.106508	0.0837981	0.0221671	0
ENSMUSG00000009378	Slc16a12	TRUE	-0.8785	0.543933	-0.191972	0.00570858	0.191141	0.771181	0.581646	0.372777	1.36172	1.04185	0.773747
ENSMUSG00000055675	Kbtbd11	TRUE	-0.411514	0.751834	5.64082	0.00570744	0.191141	47.7554	42.7187	47.9284	72.7577	65.9692	45.4351
ENSMUSG00000065589	Mir301	FALSE	0.826223	1.77304	-0.00964483	0.00571434	0.191141	0.674783	1.44334	1.01182	0.502788	0.598511	0.647788
ENSMUSG00000085885	Gm11906	FALSE	-1.6751	0.313145	-2.77669	0.00572731	0.191228	0.0578386	0.0215425	0.0887563	0.314243	0.133002	0.125959
ENSMUSG00000023904	Hcfc1r1	TRUE	-0.40444	0.75553	3.55254	0.00573908	0.191275	11.5099	9.95262	9.76319	14.0571	13.6549	13.6215
ENSMUSG00000024940	Ltbp3	TRUE	-0.52839	0.693328	3.2092	0.00580166	0.191631	8.8493	8.20768	5.85792	13.0515	10.2855	9.69883
ENSMUSG00000028782	Bai2	TRUE	-0.483094	0.715442	5.05069	0.00579316	0.191631	38.2313	26.4972	25.8636	46.6965	40.5879	39.3531
ENSMUSG00000052031	Tagap1	TRUE	0.273197	1.20848	5.25955	0.00579378	0.191631	37.0745	41.1892	43.0291	30.3768	34.9131	35.0705
ENSMUSG00000096842	Gm10736	FALSE	0.296781	1.2284	7.05988	0.00577939	0.191631	121.384	130.483	168.158	106.549	113.939	121.46
ENSMUSG00000071192	Wfikkn1	TRUE	1.13433	2.19517	0.369864	0.00578256	0.191631	0.925417	0.947868	3.568	0.85893	0.798015	0.827729
ENSMUSG00000029765	Plxna4	TRUE	-0.764188	0.588785	4.00828	0.00586058	0.193232	18.0071	12.2361	8.18333	31.2567	19.5292	14.4853
ENSMUSG00000029135	Fosl2	TRUE	-0.645213	0.639399	1.83717	0.00587189	0.193259	3.3932	2.19733	2.53843	5.27928	4.21174	3.25694
ENSMUSG00000019978	Epb4.1l2	TRUE	-0.258713	0.835833	6.67418	0.00588381	0.193307	99.8294	92.9773	92.4308	133.365	98.0893	109.8
ENSMUSG00000045886	Gm9803	TRUE	-1.37892	0.384506	-2.18457	0.00593651	0.193654	0.192795	0.0430849	0.0887563	0.335192	0.221671	0.3059
ENSMUSG00000024552	Slc14a2	TRUE	-1.167	0.445347	-0.229697	0.00593631	0.193654	0.848299	0.387764	0.461533	1.75976	1.39653	0.683776
ENSMUSG00000029810	Tmem176b	TRUE	-0.603129	0.658324	3.47067	0.00594681	0.193654	10.141	9.62948	6.83424	17.8071	12.5466	10.0587
ENSMUSG00000038070	Cntln	TRUE	-0.318253	0.80204	5.44818	0.00593026	0.193654	43.3211	44.1836	34.4907	54.9087	52.0705	45.1113
ENSMUSG00000067148	Polr1c	TRUE	0.227031	1.17042	6.35597	0.00593515	0.193654	78.2749	82.3784	95.5728	70.8722	71.5996	76.457
ENSMUSG00000096252	Tes3-ps	FALSE	-0.951701	0.517023	-1.20864	0.0060118	0.193936	0.308472	0.323137	0.195264	0.544687	0.665012	0.395871
ENSMUSG00000043004	Gng2	TRUE	-0.338231	0.791011	7.35984	0.00601848	0.193936	182.404	149.655	118.88	197.784	201.676	170.62
ENSMUSG00000028622	Mrpl37	TRUE	0.201468	1.14987	6.26082	0.00600571	0.193936	74.766	81.7752	83.2712	68.0021	69.9371	70.6089
ENSMUSG00000026857	Ntmt1	TRUE	0.270899	1.20656	5.39489	0.00599623	0.193936	37.8843	46.2732	45.4432	35.0276	36.0215	36.3481
ENSMUSG00000051065	Mb21d2	TRUE	0.34938	1.27401	4.22689	0.00596832	0.193936	19.3374	19.6252	22.4731	15.7121	14.6746	17.8142
ENSMUSG00000068324	Gm10029	FALSE	0.910601	1.87983	-0.389551	0.00598355	0.193936	0.559106	1.05558	0.905314	0.356142	0.509843	0.467847
ENSMUSG00000060735	Rxfp3	TRUE	-1.84741	0.277891	0.0892623	0.00603109	0.194004	1.38813	0.25851	0.0710051	3.54047	1.8177	0.845724
ENSMUSG00000084989	E030010N08Rik	TRUE	-1.71373	0.30487	-2.64349	0.00608993	0.194014	0.0578386	0.0430849	0.0532538	0.251394	0.110835	0.161947
ENSMUSG00000027962	Vcam1	TRUE	-0.474766	0.719583	4.89758	0.00607852	0.194014	24.9284	31.3227	17.059	41.3753	30.4132	30.0322
ENSMUSG00000047044	D030056L22Rik	TRUE	-0.26116	0.834417	5.75583	0.00607105	0.194014	46.4444	56.1181	45.4432	58.3234	59.9398	59.0387
ENSMUSG00000038013	Wipf2	TRUE	-0.242377	0.845351	5.49108	0.00606915	0.194014	44.1308	42.0724	39.1593	49.4828	50.5853	48.2242
ENSMUSG00000037993	Dhx38	TRUE	0.211663	1.15802	6.62021	0.00609447	0.194014	107.792	99.5692	114.602	91.6541	92.0155	94.3971
ENSMUSG00000016763	Scube1	TRUE	0.389536	1.30997	7.42911	0.0060701	0.194014	165.071	177.014	233.5	119.894	149.606	169.882
ENSMUSG00000059173	Pde1a	TRUE	-0.822473	0.565472	1.25135	0.00612049	0.194184	2.73769	1.46489	1.43785	3.74996	3.85707	2.39322
ENSMUSG00000028811	Yars	TRUE	0.209843	1.15656	6.75684	0.00612083	0.194184	108.351	114.197	116.644	91.9893	95.7839	105.446
ENSMUSG00000035649	Zcchc7	TRUE	-0.243914	0.844451	5.27581	0.00614336	0.194564	37.0553	36.8807	34.8635	43.0513	41.4081	44.3375
ENSMUSG00000046447	Camk2n1	TRUE	-0.409998	0.752624	3.57052	0.00617104	0.195106	9.06138	11.0297	8.92889	12.2555	14.0318	12.254
ENSMUSG00000056380	Gpr50	TRUE	2.34571	5.08311	1.52585	0.00619199	0.195434	0.578386	0.473934	5.99993	0.251394	0.665012	0.467847
ENSMUSG00000085385	9430008C03Rik	FALSE	0.284676	1.21814	5.74012	0.00620311	0.195451	49.317	57.4107	63.1767	43.7426	48.7897	46.9646
ENSMUSG00000022306	Zfpm2	TRUE	-0.700505	0.615357	1.93243	0.00624223	0.196348	3.56671	2.90823	2.57393	6.641	4.27824	3.79676
ENSMUSG00000060402	Chst8	TRUE	-0.878173	0.544056	2.10537	0.00626311	0.196507	3.45104	3.72685	1.84613	8.19126	4.47775	3.90472
ENSMUSG00000003429	Rps11	TRUE	0.263127	1.20008	9.3017	0.00626856	0.196507	606.842	707.024	726.027	580.532	539.48	579.77
ENSMUSG00000000560	Gabra2	TRUE	-0.802685	0.573281	1.21264	0.00631167	0.197352	2.40994	1.46489	1.24259	3.83376	2.0837	3.00502
ENSMUSG00000016554	Eif3d	TRUE	0.228616	1.17171	6.69271	0.00631687	0.197352	100.832	107.755	125.395	92.0312	94.3652	98.6617
ENSMUSG00000008682	Rpl10	TRUE	0.31489	1.24392	9.77126	0.00635621	0.198245	776.637	936.58	982.87	687.961	694.361	785.065
ENSMUSG00000050783	Htr1f	TRUE	-2.03672	0.243717	-2.54676	0.00637124	0.198379	0.0385591	0.129255	0.0177513	0.377091	0.221671	0.161947
ENSMUSG00000038608	Dock10	TRUE	-0.481139	0.716412	3.01825	0.00643136	0.199578	6.15017	6.67816	7.38453	10.8728	7.18213	10.1487
ENSMUSG00000082070	Gm1866	FALSE	1.48437	2.79794	-2.06538	0.00642839	0.199578	0.481988	0.495477	0.124259	0.0837981	0.177337	0.125959
ENSMUSG00000066554	Gm10167	FALSE	0.723591	1.65129	2.50326	0.00644763	0.199747	5.30187	5.10556	11.9111	4.69269	4.32258	4.51652
ENSMUSG00000022548	Apod	TRUE	-0.729845	0.602969	4.61564	0.00648971	0.200378	34.3176	14.735	15.4614	47.1783	33.7161	26.1275
ENSMUSG00000077382	n-R5s200	FALSE	1.53027	2.8884	-2.54553	0.0064834	0.200378	0.173516	0.236967	0.248518	0.146647	0.0443341	0.0359882
ENSMUSG00000092730	Snora24	FALSE	0.683126	1.60561	1.5174	0.00650825	0.200615	2.33282	3.53296	3.72777	1.55026	2.26104	2.15929
ENSMUSG00000047497	Adamts12	TRUE	-0.890884	0.539284	2.76804	0.00654185	0.201003	7.84677	4.33003	2.92896	12.3393	9.42101	6.26195
ENSMUSG00000033712	2610301G19Rik	TRUE	0.201768	1.15011	7.70957	0.00654263	0.201003	212.672	211.762	239.163	190.347	190.77	195.902
ENSMUSG00000029249	Rest	TRUE	-0.200354	0.870337	6.32673	0.00657607	0.201695	82.6128	72.9643	77.8748	93.0787	84.8777	90.2945
ENSMUSG00000020219	Timm13	TRUE	0.248559	1.18802	5.94877	0.00659128	0.201826	57.2409	65.9846	69.9577	54.6992	51.4054	56.4835
ENSMUSG00000048234	Rnf149	TRUE	0.287105	1.22019	4.68055	0.00667534	0.203492	26.143	28.3499	29.3251	22.835	22.1449	23.6983
ENSMUSG00000082145	Gm12312	FALSE	2.55544	5.87847	-2.53487	0.00665821	0.203492	0.848299	0.0646274	0.0532538	0.0837981	0	0.0719765
ENSMUSG00000053545	6430503K07Rik	TRUE	4.46873	22.1422	-2.35962	0.00667874	0.203492	0	0	0.603543	0.0209495	0	0
ENSMUSG00000085145	Gm11614	FALSE	-1.31406	0.402187	-2.31123	0.00674944	0.205307	0.0963976	0.107712	0.0710051	0.272344	0.199504	0.215929
ENSMUSG00000037638	Zbtb42	TRUE	0.514599	1.4286	2.27478	0.00677499	0.205408	6.53576	6.09652	4.82834	4.148	4.25608	3.81475
ENSMUSG00000091558	Gm17227	TRUE	1.68672	3.21925	-2.84969	0.0067665	0.205408	0.173516	0.129255	0.230766	0.0628485	0.0665012	0.0359882
ENSMUSG00000085262	Gm11574	FALSE	-2.40567	0.188721	-3.43881	0.00685359	0.20543	0.0192795	0	0.0355025	0.0837981	0.0665012	0.179941
ENSMUSG00000011118	Panx3	TRUE	-2.32938	0.19897	-3.22695	0.00685221	0.20543	0.0192795	0.0430849	0	0.209495	0.0443341	0.0719765
ENSMUSG00000028883	Sema3a	TRUE	-0.464831	0.724556	4.33133	0.00683154	0.20543	21.1496	17.5356	12.9229	28.1771	21.4577	21.5749
ENSMUSG00000017466	Timp2	TRUE	-0.221991	0.857382	6.03559	0.00682465	0.20543	61.4439	63.7011	55.0644	76.1934	65.7697	68.1617
ENSMUSG00000037062	Sh3glb1	TRUE	-0.203771	0.868278	6.47309	0.00683786	0.20543	92.9852	87.1823	79.9872	100.264	102.434	96.9163
ENSMUSG00000028093	Acp6	TRUE	0.281577	1.21552	4.46363	0.00679517	0.20543	25.4297	26.1956	25.2245	20.6143	22.2336	20.3873
ENSMUSG00000025332	Kdm5c	TRUE	0.333272	1.25987	7.87654	0.00684791	0.20543	275.504	269.992	291.156	203.399	194.56	266.061
ENSMUSG00000027613	Eif6	TRUE	0.226514	1.17	6.29057	0.00687921	0.205864	72.279	82.5292	87.5315	70.7884	64.6613	71.6526
ENSMUSG00000049401	Ogfr	TRUE	0.195285	1.14495	7.13873	0.00690078	0.205921	147.855	142.568	154.134	127.708	122.916	137.619
ENSMUSG00000024258	Polr2d	TRUE	0.220045	1.16477	6.23756	0.00690343	0.205921	73.7442	82.7877	82.7386	65.9491	67.5652	71.8685
ENSMUSG00000084345	Rpl17-ps4	FALSE	-1.66119	0.316178	-2.68991	0.00692856	0.206337	0.0771181	0.0215425	0.0532538	0.209495	0.133002	0.161947
ENSMUSG00000052482	Gm8174	FALSE	1.59995	3.03133	-2.78222	0.00694744	0.206566	0.115677	0.25851	0.195264	0.041899	0.0665012	0.0719765
ENSMUSG00000030108	Slc6a13	TRUE	0.899303	1.86516	-0.327488	0.00696005	0.206608	0.674783	1.12021	1.08283	0.398041	0.443341	0.683776
ENSMUSG00000071984	Fndc1	TRUE	2.33296	5.03838	0.321805	0.00698277	0.20695	0.308472	0.344679	4.04729	0.272344	0.332506	0.323894
ENSMUSG00000021820	Camk2g	TRUE	0.235858	1.17761	5.90507	0.00703283	0.207219	68.8665	63.7226	61.3129	55.3905	56.3265	52.9567
ENSMUSG00000064326	Siva1	TRUE	0.24925	1.18859	5.94966	0.00703675	0.207219	55.4672	64.5843	69.727	53.2118	51.6936	54.7561
ENSMUSG00000068749	Psma5	TRUE	0.258881	1.19655	7.18929	0.00702858	0.207219	122.502	156.441	161.27	116.542	123.005	128.334
ENSMUSG00000004393	Ddx56	TRUE	0.263857	1.20068	6.1197	0.00702548	0.207219	65.6854	75.2478	86.5197	60.4603	60.5826	68.3776
ENSMUSG00000081535	Gm15453	FALSE	0.777599	1.71428	0.4226	0.00705631	0.207465	0.906138	1.91728	1.47335	0.712283	0.842349	0.935694
ENSMUSG00000030428	Ttyh1	TRUE	-0.65855	0.633514	6.25144	0.00711025	0.207843	86.3723	64.2181	35.0587	97.8552	124.136	71.0588
ENSMUSG00000025190	Got1	TRUE	0.235498	1.17731	5.6169	0.00711307	0.207843	52.2668	55.4503	57.1236	43.4702	48.4794	48.0623
ENSMUSG00000022237	Ankrd33b	TRUE	0.634363	1.55225	0.248517	0.00711918	0.207843	1.61948	1.46489	1.63312	1.13127	0.997518	0.9177
ENSMUSG00000094132	Gm3264	TRUE	0.775724	1.71205	-0.501093	0.00712545	0.207843	0.848299	0.926326	0.727802	0.481839	0.465508	0.503835
ENSMUSG00000041750	Cd1d2	TRUE	1.06162	2.08727	-1.04045	0.00711039	0.207843	0.867579	0.926326	0.408279	0.356142	0.288172	0.395871
ENSMUSG00000048126	Col6a3	TRUE	-0.8126	0.569355	4.13878	0.00720771	0.208975	15.6357	14.4334	7.54429	35.2161	16.2263	14.6112
ENSMUSG00000069833	Ahnak	TRUE	-0.393392	0.761337	6.22251	0.00720954	0.208975	65.8781	68.6989	48.0882	103.134	68.3632	68.3956
ENSMUSG00000060128	Gm10075	FALSE	-0.242273	0.845412	7.0459	0.00719842	0.208975	152.54	116.545	124.188	147.715	164.502	153.022
ENSMUSG00000027559	Car3	TRUE	0.803298	1.74509	0.046497	0.00718694	0.208975	1.48452	0.990953	1.54436	0.628485	0.90885	0.773747
ENSMUSG00000028730	Wdr65	TRUE	-0.701709	0.614843	0.506623	0.00723444	0.20904	1.17605	1.33563	0.869812	2.09495	1.64036	1.74543
ENSMUSG00000038214	Bend3	TRUE	0.203133	1.1512	6.37432	0.00722913	0.20904	87.1627	86.3206	94.5787	75.9001	78.2941	78.6883
ENSMUSG00000046380	Jrk	TRUE	0.291721	1.2241	4.43844	0.00725141	0.209203	22.9041	26.0233	24.8518	19.9858	19.7509	20.5133
ENSMUSG00000078773	Rad54b	TRUE	-0.247812	0.842173	5.19544	0.00730246	0.210347	34.1826	34.5972	32.1298	39.8041	40.9426	39.0652
ENSMUSG00000023885	Thbs2	TRUE	-1.10794	0.463957	2.042	0.00732485	0.210664	2.58346	3.53296	1.66862	10.0139	3.19206	3.56284
ENSMUSG00000028653	Trit1	TRUE	0.276474	1.21123	4.85224	0.00735052	0.211073	30.1146	31.6243	30.9405	24.4481	26.534	25.5337
ENSMUSG00000032394	Igdcc3	TRUE	0.725445	1.65341	7.75988	0.00736852	0.211261	157.88	210.017	398.906	130.997	125.2	207.562
ENSMUSG00000034022	Cpsf1	TRUE	0.213305	1.15934	7.16077	0.0074011	0.211866	143.016	153.856	171.655	131.353	138.278	134.542
ENSMUSG00000026692	Fmo4	TRUE	-0.818152	0.567168	-0.68959	0.00745165	0.212797	0.501268	0.452392	0.319523	0.900829	0.576344	0.755753
ENSMUSG00000038668	Lpar1	TRUE	-0.310923	0.806126	5.76152	0.00747352	0.212797	51.2064	58.5309	39.248	66.0329	56.8364	61.8458
ENSMUSG00000028670	Lypla2	TRUE	0.20476	1.15249	6.37968	0.0074797	0.212797	85.7746	87.247	93.5847	78.6445	71.9543	80.7036
ENSMUSG00000073434	Wdr90	TRUE	0.256024	1.19418	6.75952	0.00746746	0.212797	103.435	114.369	134.785	94.8384	100.727	99.7234
ENSMUSG00000089129	Gm26407	FALSE	-1.00372	0.498712	-0.985307	0.00751181	0.213382	0.289193	0.387764	0.319523	0.523738	0.75368	0.719765
ENSMUSG00000081824	BC002163	FALSE	-0.97866	0.507451	-1.30283	0.00754391	0.213636	0.462709	0.17234	0.28402	0.649435	0.687179	0.503835
ENSMUSG00000036053	Fmnl2	TRUE	-0.18151	0.88178	7.06405	0.00753469	0.213636	133.009	129.815	124.738	141.367	156.522	141.668
ENSMUSG00000040463	Mybbp1a	TRUE	0.282829	1.21658	8.58707	0.00756529	0.213913	372.558	406.183	485.852	323.879	346.427	369.167
ENSMUSG00000038274	Fau	TRUE	0.237148	1.17866	8.35009	0.00758711	0.214202	300.144	340.952	360.794	278.23	268.953	302.805
ENSMUSG00000035878	Agphd1	TRUE	-0.362487	0.777823	3.67966	0.00761524	0.214669	10.7965	12.4946	11.201	16.3616	13.4554	14.5033
ENSMUSG00000027004	Frzb	TRUE	-0.512479	0.701017	4.57219	0.00765752	0.215531	26.8564	15.7475	21.7275	37.4787	27.8862	26.4514
ENSMUSG00000079110	Capn3	TRUE	0.578145	1.49293	2.93771	0.00768016	0.215839	8.13596	8.40156	12.4791	5.44687	5.5861	8.38526
ENSMUSG00000028798	Eif3i	TRUE	0.221606	1.16603	7.60025	0.00770552	0.216223	180.476	199.806	221.003	170.278	165.078	180.301
ENSMUSG00000018770	Atp5g3	TRUE	0.267013	1.20331	7.78956	0.00774621	0.217035	183.657	245.972	244.346	177.799	186.115	196.154
ENSMUSG00000057605	Gm6807	FALSE	-0.678803	0.624683	0.624936	0.00778328	0.217614	1.6002	1.14175	1.3846	2.49299	2.43838	1.70944
ENSMUSG00000038816	Ctnnal1	TRUE	0.229845	1.17271	6.03165	0.00779046	0.217614	65.5118	70.293	77.4665	56.6894	61.8018	63.3753
ENSMUSG00000037805	Rpl10a	TRUE	0.253772	1.19232	8.87001	0.00781036	0.217841	456.616	490.931	543.419	413.502	397.256	439.704
ENSMUSG00000085929	Gm13421	FALSE	-0.517932	0.698372	1.61442	0.00784652	0.218519	2.77625	2.73589	2.46743	3.66616	4.03441	3.72478
ENSMUSG00000085658	Gm15704	FALSE	-1.38575	0.382691	-2.29303	0.00792882	0.218699	0.115677	0.0646274	0.0887563	0.209495	0.177337	0.323894
ENSMUSG00000024256	Adcyap1	TRUE	-0.899236	0.536171	0.982924	0.00786614	0.218699	1.71588	1.83111	0.621294	2.51394	3.19206	2.05133
ENSMUSG00000070729	Gm12966	FALSE	-0.599225	0.660108	1.68431	0.00790439	0.218699	3.89446	2.77898	2.41417	4.73459	4.92109	4.12065
ENSMUSG00000030306	Tmtc1	TRUE	-0.50225	0.706005	2.13675	0.00795336	0.218699	4.28006	3.72685	3.71001	5.97061	5.12059	5.5062
ENSMUSG00000094114	Gm21967	TRUE	-0.469856	0.722037	2.67503	0.00798567	0.218699	5.03196	5.62258	5.07686	7.18568	7.91364	6.69381
ENSMUSG00000027692	Tnik	TRUE	-0.441525	0.736356	4.914	0.00799258	0.218699	33.6428	26.9712	20.9465	42.3599	37.0412	31.3637
ENSMUSG00000025578	Cbx8	TRUE	-0.350383	0.784376	3.81224	0.00796653	0.218699	11.8184	12.6239	11.3431	16.1521	14.7189	14.7372
ENSMUSG00000059423	Zfp933	TRUE	-0.305379	0.80923	4.54063	0.00788331	0.218699	23.174	21.3917	19.1891	24.6785	27.731	26.3614
ENSMUSG00000056394	Lig1	TRUE	0.216011	1.16152	8.02766	0.00794386	0.218699	270.241	278.501	316.345	239.411	248.316	257.082
ENSMUSG00000021913	Ogdhl	TRUE	0.252006	1.19086	5.15116	0.00794523	0.218699	37.4987	37.6131	41.3782	32.786	31.3664	33.667
ENSMUSG00000041841	Rpl37	TRUE	0.26138	1.19862	8.32121	0.00799512	0.218699	283.602	330.612	374.924	268.112	273.231	283.893
ENSMUSG00000026073	Il1r2	TRUE	1.54833	2.92479	-2.49076	0.00794544	0.218699	0.212075	0.301594	0.159761	0.104748	0.0665012	0.0539824
ENSMUSG00000022636	Alcam	TRUE	-0.792947	0.577164	6.47923	0.0080296	0.219124	92.7731	84.7911	31.4375	166.318	111.678	84.1045
ENSMUSG00000044674	Fzd1	TRUE	-0.28079	0.82314	6.102	0.00804091	0.219124	60.5184	74.3861	55.9165	86.5843	69.7154	75.4313
ENSMUSG00000037482	Erv3	TRUE	2.6539	6.29365	-2.79646	0.00804624	0.219124	0.0771181	0.861698	0.0710051	0.0209495	0	0.125959
ENSMUSG00000066538	Gm6254	FALSE	-1.45669	0.364329	-2.54594	0.00812665	0.219372	0.115677	0.0430849	0.0355025	0.209495	0.155169	0.179941
ENSMUSG00000096574	Gm2956	TRUE	-1.17811	0.44193	-1.45436	0.00811415	0.219372	0.0963976	0.150797	0.266269	0.335192	0.554177	0.3059
ENSMUSG00000045328	Cenpe	TRUE	-0.205953	0.866966	7.96985	0.00808645	0.219372	233.379	239.789	242.003	273.433	263.389	288.05
ENSMUSG00000023495	Pcbp4	TRUE	0.214256	1.16011	8.28312	0.00807892	0.219372	309.089	318.182	330.031	268.468	267.667	289.022
ENSMUSG00000025155	Dus1l	TRUE	0.247602	1.18723	5.81907	0.00811238	0.219372	54.1176	60.7066	67.7388	48.2886	52.7576	52.7408
ENSMUSG00000053038	Gm6180	FALSE	0.498469	1.41271	2.20763	0.00811854	0.219372	5.10907	5.23482	5.09461	3.14243	4.07874	3.70679
ENSMUSG00000096780	Tmem181b-ps	TRUE	0.516138	1.43012	1.87869	0.00814455	0.219534	4.16438	3.94227	4.27805	2.63964	3.01472	3.00502
ENSMUSG00000029022	Miip	TRUE	0.225498	1.16918	5.86219	0.00824127	0.221495	61.1739	64.929	60.2123	50.4883	53.999	54.8281
ENSMUSG00000049300	Prmt6	TRUE	0.260303	1.19773	5.0031	0.00823006	0.221495	33.6235	36.4714	32.3783	29.2874	27.9527	28.2868
ENSMUSG00000002944	Cd36	TRUE	-1.24757	0.421156	-1.46124	0.00827519	0.222083	0.134957	0.215425	0.14201	0.607536	0.354673	0.215929
ENSMUSG00000036437	Npy1r	TRUE	-1.25883	0.417884	-0.263692	0.00830105	0.222293	0.925417	0.560104	0.266269	2.1578	1.39653	0.647788
ENSMUSG00000021127	Zfp36l1	TRUE	-0.227083	0.85436	6.13675	0.00833117	0.222293	74.8238	60.0604	72.1589	85.9978	75.8114	80.5957
ENSMUSG00000040964	Arhgef10l	TRUE	0.212683	1.15884	5.80567	0.00831086	0.222293	61.3667	58.1431	56.7863	49.0847	52.4695	50.5815
ENSMUSG00000018841	Rad51d	TRUE	0.283372	1.21704	4.27933	0.0083262	0.222293	20.5134	21.4347	20.0944	16.4873	16.9578	17.5083
ENSMUSG00000052915	Msl1	TRUE	-0.190906	0.876055	7.73886	0.00837801	0.223184	192.776	200.409	191.483	213.874	234.927	218.593
ENSMUSG00000007603	Dus3l	TRUE	0.25295	1.19164	5.54837	0.00838873	0.223184	47.5433	49.0953	53.0763	41.2705	43.2258	41.1705
ENSMUSG00000085781	Gm15640	FALSE	-0.926653	0.526078	-1.11251	0.00845112	0.223901	0.366311	0.366222	0.177513	0.544687	0.576344	0.593806
ENSMUSG00000039607	Rbms3	TRUE	-0.496887	0.708634	3.4903	0.00843989	0.223901	10.4302	11.3098	6.76323	15.8169	12.2584	12.11
ENSMUSG00000002190	Clgn	TRUE	-0.398656	0.758564	3.51068	0.00845207	0.223901	9.77472	8.81087	11.13	11.8574	14.0761	13.2797
ENSMUSG00000072437	Nanos1	TRUE	-0.480134	0.716911	2.81427	0.00848135	0.224355	6.74783	5.96726	4.72184	8.19126	8.62299	7.50355
ENSMUSG00000026068	Il18rap	TRUE	-0.887637	0.540499	0.0674536	0.00851184	0.224839	0.732622	1.03404	0.497035	1.63406	1.57386	0.971682
ENSMUSG00000024064	Galnt14	TRUE	-0.86043	0.550789	1.77808	0.00852971	0.224952	3.23896	2.52047	1.70412	6.85049	3.79057	2.91505
ENSMUSG00000049482	Ctu2	TRUE	0.292584	1.22483	4.91905	0.00854048	0.224952	28.3795	31.9044	35.1475	26.6478	24.7606	26.5053
ENSMUSG00000032180	Tmed1	TRUE	0.312755	1.24208	4.84256	0.00855621	0.225045	26.7985	29.7717	35.1653	25.4746	23.2533	25.1378
ENSMUSG00000041645	Ddx24	TRUE	0.186828	1.13826	6.77652	0.00859483	0.22573	112.978	112.71	123.602	98.5256	100.616	107.713
ENSMUSG00000053565	Eif3k	TRUE	0.199395	1.14822	7.29184	0.00860668	0.22573	161.909	157.928	183.264	147.568	138.988	151.618
ENSMUSG00000047735	Samd9l	TRUE	-0.907483	0.533114	-0.882163	0.00873287	0.228714	0.42415	0.366222	0.177513	0.502788	0.53201	0.755753
ENSMUSG00000032078	Zfp259	TRUE	0.251311	1.19029	5.75101	0.00878503	0.22971	50.628	56.9583	63.1767	45.3976	48.2799	49.7897
ENSMUSG00000032978	Guca2b	TRUE	3.90283	14.9579	-3.65604	0.00879575	0.22971	0.385591	0.0215425	0	0.0209495	0	0
ENSMUSG00000055093	Gm8430	FALSE	-0.607577	0.656298	1.43836	0.00881977	0.230012	3.21968	2.34813	2.27216	4.42035	3.79057	3.74278
ENSMUSG00000069378	Prdm6	TRUE	-1.14205	0.453116	-0.544656	0.0088423	0.230274	0.212075	0.710901	0.319523	1.50836	0.53201	0.683776
ENSMUSG00000033726	Emx1	TRUE	-0.539304	0.688103	5.112	0.0089312	0.231309	38.212	31.2797	22.1891	51.3892	46.8169	35.0345
ENSMUSG00000033970	Rfc3	TRUE	0.213927	1.15984	6.52379	0.00893216	0.231309	90.5752	98.0828	102.869	76.361	82.4615	92.4718
ENSMUSG00000082286	Pisd-ps1	FALSE	0.371138	1.29337	4.84235	0.00891807	0.231309	34.3561	37.527	31.1712	23.2959	24.7385	31.5797
ENSMUSG00000071553	Cpa2	TRUE	0.636736	1.55481	1.72469	0.00892621	0.231309	3.00761	3.55451	5.59165	2.68154	2.34971	2.78909
ENSMUSG00000009566	Fpgs	TRUE	0.285143	1.21853	4.65073	0.00899578	0.23263	27.107	27.0573	28.331	23.9662	21.5907	22.1508
ENSMUSG00000043740	B430306N03Rik	TRUE	-1.96256	0.256572	-2.87876	0.00910603	0.233575	0	0.0646274	0.0177513	0.146647	0.110835	0.0719765
ENSMUSG00000031253	Srpx2	TRUE	-0.913239	0.530992	-0.735859	0.00908639	0.233575	0.597665	0.323137	0.390528	1.17317	0.687179	0.629794
ENSMUSG00000054555	Adam12	TRUE	-0.521211	0.696787	2.26771	0.00910543	0.233575	3.64383	3.92073	4.42006	6.93429	5.00976	5.27228
ENSMUSG00000018340	Anxa6	TRUE	-0.458813	0.727585	5.75474	0.00910822	0.233575	54.8888	47.1995	33.1771	81.2213	51.3168	53.3526
ENSMUSG00000054604	Cggbp1	TRUE	-0.193889	0.874246	7.47765	0.00908139	0.233575	167.944	178.996	159.087	183.141	198.55	197.054
ENSMUSG00000027327	1700037H04Rik	TRUE	0.219283	1.16415	5.77632	0.00910144	0.233575	61.7716	58.1862	61.3484	53.8821	49.2774	52.5788
ENSMUSG00000090244	Gm16572	FALSE	-1.07556	0.474487	-1.63385	0.00914673	0.234238	0.173516	0.150797	0.14201	0.230445	0.399007	0.359882
ENSMUSG00000082110	Gm11196	FALSE	-1.4925	0.355396	-2.9111	0.00925621	0.236339	0.154236	0.0430849	0.0355025	0.188546	0.266005	0.215929
ENSMUSG00000020866	Cacna1g	TRUE	-0.386507	0.764979	6.51408	0.00924673	0.236339	73.7635	66.3508	100.135	129.342	85.6314	99.1476
ENSMUSG00000005625	Psmd4	TRUE	0.187771	1.139	7.21718	0.00927194	0.236339	148.125	156.269	170.306	136.025	135.773	144.961
ENSMUSG00000019054	Fis1	TRUE	0.189712	1.14054	6.27117	0.00927998	0.236339	79.2196	82.2491	78.7801	72.4644	65.1047	73.0021
ENSMUSG00000002372	Ranbp3	TRUE	0.200944	1.14945	7.2332	0.00929654	0.236434	147.893	154.179	174.726	134.789	134.643	145.374
ENSMUSG00000037685	Atp8a1	TRUE	-0.271265	0.828592	5.64509	0.00936113	0.237749	47.0999	49.72	42.0705	56.5846	55.9719	55.026
ENSMUSG00000037686	Aspg	TRUE	0.666997	1.58777	1.08529	0.00941151	0.238701	1.71588	2.52047	3.17748	1.59216	1.41869	1.65546
ENSMUSG00000090260	2810442N19Rik	FALSE	-1.11315	0.462285	-1.77745	0.00945274	0.23913	0.115677	0.129255	0.159761	0.377091	0.221671	0.287906
ENSMUSG00000041815	Poldip3	TRUE	0.207485	1.15467	7.24304	0.00945435	0.23913	145.098	171.026	175.773	139.859	138.256	147.858
ENSMUSG00000006589	Aprt	TRUE	0.235703	1.17748	6.18918	0.00950487	0.240079	69.3485	80.1164	88.5078	68.7563	64.085	69.2594
ENSMUSG00000021135	Slc10a1	TRUE	-0.749831	0.594673	-0.817422	0.00955748	0.240638	0.443429	0.409307	0.408279	0.754182	0.709346	0.665782
ENSMUSG00000028896	Rcc1	TRUE	0.252689	1.19143	7.33701	0.0095661	0.240638	150.766	167.083	194.518	131.626	144.95	153.472
ENSMUSG00000028970	Abcb1b	TRUE	0.624861	1.54206	0.7834	0.00954068	0.240638	2.46778	1.96036	1.84613	1.27792	1.28569	1.49351
ENSMUSG00000028184	Lphn2	TRUE	0.199107	1.14799	8.03117	0.00960161	0.241203	309.147	279.083	282.707	236.709	259.754	262.192
ENSMUSG00000045312	Lhfpl2	TRUE	-0.289638	0.818108	5.52375	0.00966252	0.242403	48.9314	38.9919	38.8575	57.6531	48.4794	48.854
ENSMUSG00000081434	Gm14165	FALSE	-1.21653	0.430318	-0.916624	0.00979876	0.243573	0.366311	0.560104	0.195264	1.38267	0.842349	0.377876
ENSMUSG00000086155	9430041J12Rik	FALSE	-1.02458	0.491552	0.311437	0.00974241	0.243573	1.09893	0.840156	0.390528	1.63406	2.41621	0.701771
ENSMUSG00000020027	Socs2	TRUE	-0.409616	0.752824	4.63513	0.00982964	0.243573	28.8807	22.8565	18.124	33.4354	30.1472	29.2045
ENSMUSG00000047496	Rnf152	TRUE	-0.383641	0.766501	4.11999	0.00980101	0.243573	14.1126	14.4334	19.6329	21.8503	22.5661	18.5159
ENSMUSG00000028932	Psmc2	TRUE	0.20838	1.15539	7.44848	0.0098335	0.243573	167.905	188.367	197.234	158.504	160.224	160.346
ENSMUSG00000061904	Slc25a3	TRUE	0.231268	1.17387	8.45335	0.00981986	0.243573	317.958	392.094	383.339	303.642	311.802	315.977
ENSMUSG00000033790	Tubgcp5	TRUE	0.245569	1.18556	5.67317	0.0098231	0.243573	52.2475	57.1521	45.248	43.0094	44.6888	42.7
ENSMUSG00000024565	Sall3	TRUE	0.353828	1.27795	5.04104	0.00984105	0.243573	45.5575	34.3171	33.7096	26.4802	30.7014	31.6876
ENSMUSG00000020020	Usp44	TRUE	0.491957	1.40635	3.12549	0.00977767	0.243573	10.4302	8.01379	12.7809	6.24296	7.15996	8.79912
ENSMUSG00000065259	Snora30	FALSE	0.832294	1.78051	-0.855196	0.00973979	0.243573	0.559106	0.667816	0.692299	0.314243	0.443341	0.323894
ENSMUSG00000004415	Col26a1	TRUE	-0.296005	0.814505	6.05131	0.00992598	0.244742	58.1085	60.4481	48.4965	79.9433	58.4989	66.5962
ENSMUSG00000037573	Tob1	TRUE	-0.282289	0.822285	4.85915	0.00992808	0.244742	27.3577	28.8023	23.9642	32.7022	32.2309	32.4614
ENSMUSG00000023051	Tarbp2	TRUE	0.221359	1.16583	5.68452	0.009902	0.244742	50.4352	53.77	57.2656	46.8222	45.8858	45.813
ENSMUSG00000021767	Kat6b	TRUE	-0.433888	0.740264	7.0623	0.00996275	0.24527	150.033	132.314	83.2357	176.269	181.881	135.694
ENSMUSG00000047787	Flrt1	TRUE	-0.512045	0.701228	3.46426	0.0100181	0.246085	11.3171	7.77683	10.2602	16.0892	12.4136	13.3876
ENSMUSG00000023026	Dip2b	TRUE	0.200175	1.14884	6.66601	0.0100225	0.246085	104.032	109.457	111.709	92.1569	100.195	90.7623
ENSMUSG00000067575	Rpl35a-ps3	FALSE	-1.6121	0.327121	-1.9838	0.0100363	0.246097	0.385591	0.0215425	0.0532538	0.481839	0.443341	0.503835
ENSMUSG00000002617	Zfp40	TRUE	-0.305573	0.809121	4.61625	0.0100584	0.246311	22.1329	24.86	18.9583	26.7525	28.5512	26.1634
ENSMUSG00000027967	Neurog2	TRUE	-0.520528	0.697117	5.83839	0.0101163	0.24725	55.6986	59.608	28.9168	85.3274	65.6145	55.9077
ENSMUSG00000022580	Rhpn1	TRUE	0.412439	1.33093	4.56203	0.0101369	0.24725	20.0507	23.6321	33.8694	18.8336	19.374	20.0814
ENSMUSG00000064984	Snord73a	FALSE	0.84762	1.79953	-0.476547	0.0101349	0.24725	0.597665	0.904783	0.923066	0.586586	0.443341	0.323894
ENSMUSG00000087221	BC037032	FALSE	-0.728451	0.603552	0.148108	0.0102156	0.248841	1.06037	0.732444	0.621294	1.52931	1.30786	1.16962
ENSMUSG00000015879	Fam184b	TRUE	-0.610906	0.654786	1.78233	0.0102334	0.248946	3.58599	2.34813	2.98221	5.55162	4.41125	3.68879
ENSMUSG00000020241	Col6a2	TRUE	-0.573463	0.672002	4.39154	0.0102494	0.249006	23.1162	15.7475	14.3075	35.9703	21.6794	21.485
ENSMUSG00000074622	Mafb	TRUE	-0.696842	0.616921	2.31242	0.0103081	0.249122	3.77879	4.54546	3.40824	9.40633	4.25608	5.34425
ENSMUSG00000045007	Tubg2	TRUE	-0.637325	0.642904	0.812691	0.0102919	0.249122	1.77372	1.40026	1.01182	2.1578	2.37188	1.97935
ENSMUSG00000034297	Med13	TRUE	-0.223772	0.856324	7.19473	0.0102945	0.249122	150.612	144.442	122.43	153.853	176.317	157.341
ENSMUSG00000053263	Gm12592	FALSE	0.573233	1.48785	0.727119	0.0103063	0.249122	1.92795	1.93882	1.68637	1.25697	1.10835	1.34956
ENSMUSG00000030249	Abcc9	TRUE	-0.697328	0.616713	2.35514	0.0103424	0.249623	3.97158	3.57605	2.8402	7.43708	5.27576	4.13865
ENSMUSG00000025465	Echs1	TRUE	0.200639	1.14921	6.39325	0.0104079	0.250876	76.5397	90.3922	90.922	77.3037	74.4592	72.6243
ENSMUSG00000030621	Me3	TRUE	0.915088	1.88568	0.0536677	0.010475	0.252166	0.751902	1.12021	2.0769	0.565637	0.775847	0.755753
ENSMUSG00000001119	Col6a1	TRUE	-0.708767	0.611843	3.61679	0.0104888	0.252169	13.0137	8.94012	7.42003	24.8461	10.751	12.4159
ENSMUSG00000034432	Cops8	TRUE	0.183255	1.13544	6.67045	0.0105218	0.252633	99.8487	109.522	106.827	90.6695	90.3973	97.3482
ENSMUSG00000042548	Asxl1	TRUE	0.176994	1.13053	7.57935	0.0105606	0.253236	203.226	200.194	209.429	176.416	178.179	187.481
ENSMUSG00000030603	Psmc4	TRUE	0.191837	1.14222	7.61374	0.0106029	0.253263	199.292	201.831	220.542	176.793	176.539	190.918
ENSMUSG00000033020	Polr2f	TRUE	0.260755	1.19811	5.75382	0.0105997	0.253263	50.9751	58.0569	65.4667	49.0428	47.637	48.98
ENSMUSG00000038900	Rpl12	TRUE	0.313592	1.2428	9.60192	0.0106027	0.253263	711.8	803.383	950.278	620.797	637.414	725.577
ENSMUSG00000092029	Gm9027	FALSE	0.861319	1.8167	1.13251	0.010654	0.254153	0.906138	2.73589	2.98221	1.13127	1.06402	1.43953
ENSMUSG00000056592	Zfp658	TRUE	-0.333098	0.79383	3.68548	0.0106877	0.254283	11.2592	12.0853	11.0945	14.6228	14.7189	14.0354
ENSMUSG00000071266	Zfp946	TRUE	-0.261992	0.833935	5.32419	0.0107276	0.254283	37.0553	40.9091	31.6683	41.7314	45.4868	44.1756
ENSMUSG00000025027	Xpnpep1	TRUE	0.181322	1.13392	6.5249	0.0107283	0.254283	105.652	97.6951	96.3361	91.8008	85.0107	87.4694
ENSMUSG00000097451	Rian	FALSE	0.354426	1.27848	8.99118	0.0106882	0.254283	417.035	536.515	604.022	355.346	404.97	457.968
ENSMUSG00000032577	Mapkapk3	TRUE	0.515811	1.4298	2.74143	0.0107183	0.254283	10.1218	7.49678	6.47921	5.44687	5.14276	6.24396
ENSMUSG00000037921	Ddx60	TRUE	-1.4352	0.369795	-2.25925	0.0108388	0.256311	0.115677	0.129255	0.0355025	0.398041	0.199504	0.161947
ENSMUSG00000023828	Slc22a3	TRUE	-1.37703	0.38501	-1.84172	0.0108555	0.256311	0.115677	0.150797	0.0710051	0.293293	0.177337	0.395871
ENSMUSG00000032024	Clmp	TRUE	-0.397126	0.75937	4.77566	0.0108443	0.256311	23.3089	26.2818	16.4377	34.4201	25.8468	26.6313
ENSMUSG00000029185	Fam114a1	TRUE	-0.344081	0.787809	4.24225	0.0108717	0.256367	19.2795	17.1693	15.3193	26.3754	18.975	20.3513
ENSMUSG00000081400	Gm13680	FALSE	-0.659117	0.633266	0.17254	0.0109263	0.256997	0.790461	0.926326	0.940817	1.59216	1.37436	1.24159
ENSMUSG00000096039	D830030K20Rik	TRUE	0.833073	1.78148	-0.636769	0.0109197	0.256997	0.597665	0.861698	0.816558	0.335192	0.487676	0.449853
ENSMUSG00000066809	Gm10180	FALSE	-0.609945	0.655222	0.505946	0.0111795	0.257058	1.29173	1.27101	1.10058	2.074	1.7512	1.76342
ENSMUSG00000015852	Fcrls	TRUE	-0.557508	0.679475	2.07502	0.0111771	0.257058	3.97158	3.36062	2.68044	5.76112	4.65508	4.31859
ENSMUSG00000071324	Armc2	TRUE	-0.533455	0.690898	1.35445	0.0110664	0.257058	2.77625	2.1327	2.13015	3.60332	3.52456	3.07699
ENSMUSG00000022090	Pdlim2	TRUE	-0.492113	0.710983	2.89579	0.0109917	0.257058	6.38152	6.18269	5.55615	10.6005	6.65012	8.22331
ENSMUSG00000018427	Ypel2	TRUE	-0.484262	0.714863	3.36881	0.011146	0.257058	9.96752	9.41405	6.24844	12.9887	13.2337	9.62685
ENSMUSG00000074093	Svip	TRUE	-0.363182	0.777448	4.08774	0.0111599	0.257058	15.5393	16.6523	12.0709	20.342	17.645	18.8938
ENSMUSG00000027175	Tcp11l1	TRUE	-0.285259	0.820594	4.64885	0.0109734	0.257058	26.6829	24.106	22.5441	29.3293	31.0339	29.0065
ENSMUSG00000019539	Rcn3	TRUE	-0.272184	0.828065	5.57863	0.0111273	0.257058	45.2298	40.2198	48.4787	62.4296	46.6617	52.6868
ENSMUSG00000085438	1700020I14Rik	FALSE	-0.218912	0.859213	8.2854	0.0111467	0.257058	309.494	311.849	263.127	334.061	367.441	327.871
ENSMUSG00000019823	Mical1	TRUE	0.228057	1.17126	5.32933	0.011069	0.257058	41.2582	40.7368	45.2657	36.3684	36.3097	36.0062
ENSMUSG00000075040	Zfp408	TRUE	0.244307	1.18452	5.1299	0.0109894	0.257058	38.2891	36.2344	37.0824	31.7385	31.1226	31.3637
ENSMUSG00000079562	Maea	TRUE	0.268984	1.20496	7.11903	0.0110141	0.257058	124.565	138.841	176.022	118.595	116	130.097
ENSMUSG00000042660	Wdr55	TRUE	0.272221	1.20767	5.24335	0.0110148	0.257058	36.9781	39.1426	46.7923	31.5919	33.9156	36.2761
ENSMUSG00000047675	Rps8	TRUE	0.291095	1.22357	9.84859	0.0111532	0.257058	878.356	970.983	1098.45	769.371	780.879	858.913
ENSMUSG00000037369	Kdm6a	TRUE	0.361743	1.28498	6.62357	0.0110474	0.257058	118.839	113.96	119.413	78.854	78.7596	116.422
ENSMUSG00000028982	Slc25a33	TRUE	0.638915	1.55716	1.89051	0.0111378	0.257058	3.35464	3.96381	5.6804	2.57679	2.63788	3.13098
ENSMUSG00000062093	Gm10110	TRUE	0.6451	1.56385	0.867466	0.0111466	0.257058	1.54236	2.56355	2.48518	1.27792	1.39653	1.5295
ENSMUSG00000094497	Gm8210	FALSE	1.86639	3.64619	-3.10159	0.0110821	0.257058	0.308472	0.0646274	0.159761	0.0628485	0.0443341	0.0359882
ENSMUSG00000056158	Car10	TRUE	-1.36525	0.388168	-1.96585	0.0112243	0.257217	0.231354	0.107712	0.106508	0.544687	0.465508	0.161947
ENSMUSG00000031776	Arl2bp	TRUE	0.180353	1.13316	7.64604	0.0112699	0.257217	201.683	214.649	209.997	177.38	190.127	185.213
ENSMUSG00000039768	Dnajc11	TRUE	0.181788	1.13429	7.10866	0.0112445	0.257217	140.162	142.848	160.88	127.101	132.204	132.077
ENSMUSG00000002319	Ipo4	TRUE	0.247269	1.18696	6.61538	0.0112288	0.257217	93.7371	101.013	126.158	87.4014	88.8235	94.1632
ENSMUSG00000039830	Olig2	TRUE	0.930836	1.90638	4.36519	0.0112403	0.257217	19.3374	12.5162	33.8339	6.99714	14.5638	12.9018
ENSMUSG00000047798	Cd300lf	TRUE	1.44871	2.72963	-2.57585	0.0112619	0.257217	0.192795	0.17234	0.195264	0.0628485	0.0443341	0.0899706
ENSMUSG00000045273	Cenph	TRUE	0.235768	1.17753	5.68015	0.0113109	0.257833	49.3749	58.617	57.2478	43.6588	48.9892	47.6664
ENSMUSG00000093104	Gm24980	FALSE	-1.4461	0.367012	-2.19576	0.0113745	0.258964	0.173516	0.0861698	0.0177513	0.209495	0.37684	0.179941
ENSMUSG00000025907	Rb1cc1	TRUE	-0.197427	0.872105	6.20878	0.0114046	0.259329	70.2739	74.5585	63.8335	75.8372	82.927	80.4337
ENSMUSG00000039533	Mmd2	TRUE	-0.723079	0.605803	1.55755	0.0114363	0.259729	1.94723	2.49893	1.3491	3.49857	3.59107	2.46519
ENSMUSG00000018479	1700125H20Rik	TRUE	1.39272	2.62574	-2.76637	0.0114655	0.260073	0.115677	0.193882	0.230766	0.0628485	0.0665012	0.0719765
ENSMUSG00000027831	Veph1	TRUE	-0.619638	0.650834	4.15677	0.0114886	0.260278	23.1933	15.0797	9.55018	30.1464	25.869	17.4723
ENSMUSG00000032334	Loxl1	TRUE	-0.52237	0.696227	3.23427	0.0115202	0.260672	10.5845	6.89359	6.85199	14.8742	9.86435	10.2207
ENSMUSG00000028088	Fmo5	TRUE	-0.716886	0.608409	-0.146752	0.0115571	0.260868	0.674783	0.581646	0.674548	1.15222	1.24136	0.809735
ENSMUSG00000029860	Zyx	TRUE	-0.228075	0.853773	6.23205	0.0115564	0.260868	82.0344	64.6274	71.9814	92.8063	80.5995	82.737
ENSMUSG00000025722	Wdr73	TRUE	0.219071	1.16398	5.67405	0.0116611	0.261617	50.3967	55.0625	56.8218	46.4451	44.6888	48.2602
ENSMUSG00000046079	Lrrc8d	TRUE	0.242548	1.18308	5.41203	0.0116154	0.261617	46.4829	45.433	46.2953	38.6519	39.0362	39.1372
ENSMUSG00000052374	Actn2	TRUE	0.649787	1.56894	1.07167	0.0116586	0.261617	1.92795	2.67126	3.26623	1.42457	1.6182	1.96136
ENSMUSG00000055471	Alk	TRUE	1.37187	2.58806	-2.20765	0.0116429	0.261617	0.173516	0.193882	0.266269	0.104748	0.0443341	0.0899706
ENSMUSG00000073656	Gm10558	FALSE	2.1011	4.29036	-3.36813	0.0116483	0.261617	0.192795	0.0861698	0.0887563	0.041899	0	0.0359882
ENSMUSG00000053226	Dand5	TRUE	-0.597495	0.6609	1.43045	0.0117106	0.2618	2.66057	1.91728	1.61536	3.05863	2.99255	3.31092
ENSMUSG00000047417	Rexo1	TRUE	0.171367	1.12613	6.59443	0.0117118	0.2618	104.63	100.151	103.508	91.9474	92.1485	89.7007
ENSMUSG00000034164	Emid1	TRUE	0.357231	1.28096	4.24308	0.0116925	0.2618	19.588	21.6933	26.9819	15.8588	17.9997	19.4336
ENSMUSG00000027665	Pik3ca	TRUE	-0.17966	0.882911	6.50053	0.0117463	0.262254	91.1536	86.1914	80.5552	95.8859	100.572	95.6387
ENSMUSG00000034903	Cobll1	TRUE	-0.358192	0.780141	3.45548	0.0118092	0.263156	10.9122	10.8359	9.9052	13.282	14.3199	12.9738
ENSMUSG00000034648	Lrrn1	TRUE	-0.311643	0.805724	8.62692	0.0118222	0.263156	402.749	391.103	375.705	463.885	544.711	442.997
ENSMUSG00000022865	Cxadr	TRUE	-0.189345	0.877004	7.88553	0.0118437	0.263156	215.95	231.969	222.938	247.896	260.862	256.164
ENSMUSG00000002524	Puf60	TRUE	0.187527	1.13881	7.8056	0.0118297	0.263156	222.197	235.481	248.198	210.941	197.686	211.197
ENSMUSG00000027750	Postn	TRUE	-0.934327	0.523286	2.06299	0.0118769	0.263577	2.87265	2.77898	2.30766	7.22758	3.30289	4.67847
ENSMUSG00000082193	Rpl5-ps1	FALSE	-1.33446	0.396539	-2.61785	0.0119071	0.263612	0.0963976	0.107712	0.106508	0.41899	0.199504	0.179941
ENSMUSG00000015981	Stk32c	TRUE	0.644806	1.56353	1.33113	0.0118962	0.263612	2.81481	2.4343	2.57393	1.67596	1.59603	1.72744
ENSMUSG00000073940	Hbb-b2	TRUE	-0.854123	0.553201	5.44172	0.0120539	0.264444	44.2272	30.6118	15.1418	65.9072	43.381	53.3526
ENSMUSG00000032231	Anxa2	TRUE	-0.46086	0.726553	6.06695	0.0120593	0.264444	68.2881	63.8088	37.0824	100.453	67.6982	64.6709
ENSMUSG00000068566	Myadm	TRUE	-0.308989	0.807207	5.12954	0.0119933	0.264444	35.3201	30.3533	30.6742	47.1364	35.423	36.816
ENSMUSG00000025103	Btbd1	TRUE	-0.187701	0.878004	6.68236	0.0119606	0.264444	101.487	102.671	92.7148	108.56	113.739	115.756
ENSMUSG00000033222	Ttf2	TRUE	0.197504	1.14671	6.50473	0.0120179	0.264444	88.9172	99.8493	102.07	78.833	86.2742	88.4951
ENSMUSG00000033323	Ctdp1	TRUE	0.209705	1.15645	5.81748	0.0120292	0.264444	60.1907	57.9492	64.7389	50.5093	52.0261	55.6018
ENSMUSG00000005410	Mcm5	TRUE	0.234725	1.17668	8.47374	0.012055	0.264444	347.494	369.819	429.297	318.475	316.59	339.387
ENSMUSG00000020017	Hal	TRUE	1.9394	3.83546	-2.37677	0.0120502	0.264444	0.269913	0.107712	0.42603	0.0628485	0.110835	0.0359882
ENSMUSG00000070999	Ccin	TRUE	-1.30729	0.40408	-2.31916	0.0121449	0.264707	0.0963976	0.0646274	0.0710051	0.230445	0.177337	0.179941
ENSMUSG00000090516	Rps11-ps1	FALSE	-0.910262	0.532089	-0.811388	0.012104	0.264707	0.751902	0.366222	0.319523	1.00558	0.953184	0.755753
ENSMUSG00000051495	Irf2bp2	TRUE	-0.299925	0.812295	4.37656	0.012155	0.264707	17.8143	17.6864	20.3784	26.0612	22.1671	20.6213
ENSMUSG00000022672	Prkdc	TRUE	-0.202341	0.869139	5.93773	0.0121026	0.264707	63.4296	56.5059	55.0999	69.0496	65.5037	66.8302
ENSMUSG00000002833	Hdgfrp2	TRUE	0.162528	1.11925	7.08553	0.0122085	0.264707	141.743	142.87	153.371	129.154	130.076	132.113
ENSMUSG00000009555	Cdk9	TRUE	0.204086	1.15196	6.55232	0.0122043	0.264707	89.2064	102.133	105.247	82.2059	83.459	91.752
ENSMUSG00000006715	Gmnn	TRUE	0.21476	1.16051	6.31844	0.0122223	0.264707	74.6696	87.9579	88.6498	67.7717	72.9297	75.7912
ENSMUSG00000030956	Fam53b	TRUE	0.235101	1.17699	5.98833	0.0121647	0.264707	74.3804	68.3327	65.3602	52.29	65.5037	59.0027
ENSMUSG00000003421	Nosip	TRUE	0.243959	1.18424	4.91772	0.0122221	0.264707	33.0644	32.0983	32.4848	28.1771	26.8	27.477
ENSMUSG00000097971	RP23-81C12.1	FALSE	0.449933	1.36598	4.34445	0.0122289	0.264707	25.8924	22.318	16.8815	18.7498	13.1894	15.6909
ENSMUSG00000097518	AC159277.1	FALSE	0.573303	1.48793	3.46147	0.0121487	0.264707	8.81074	11.1159	17.272	6.36865	8.22398	10.4006
ENSMUSG00000051048	P4ha3	TRUE	-1.07288	0.475368	1.54018	0.0123079	0.265183	2.40994	2.49893	0.585792	5.38403	3.5689	2.59115
ENSMUSG00000024921	Smarca2	TRUE	-0.239654	0.846948	5.39557	0.0123084	0.265183	40.2364	37.57	41.0054	49.2523	43.3366	47.7024
ENSMUSG00000060938	Rpl26	TRUE	0.26303	1.2	9.07893	0.0122934	0.265183	483.01	560.384	617.992	449.179	439.196	496.098
ENSMUSG00000081600	Gm12286	FALSE	0.992929	1.99022	-1.16011	0.0122693	0.265183	0.366311	0.517019	0.497035	0.188546	0.288172	0.215929
ENSMUSG00000048251	Bcl11b	TRUE	-0.510495	0.701981	5.3256	0.0123794	0.266093	47.7168	38.1732	22.0293	53.924	57.9669	41.8363
ENSMUSG00000068922	Msto1	TRUE	0.235909	1.17765	5.04614	0.0123699	0.266093	35.7828	36.2344	37.8279	31.0891	31.2112	30.9859
ENSMUSG00000066632	Pgk1-rs7	TRUE	-1.16228	0.446805	-2.06974	0.0124068	0.266271	0.154236	0.236967	0.0887563	0.460889	0.37684	0.233924
ENSMUSG00000007080	Pole	TRUE	0.179326	1.13235	7.27786	0.0124175	0.266271	168.947	163.593	172.169	145.201	154.815	145.752
ENSMUSG00000085700	Hbb-bh0	FALSE	1.68649	3.21873	-1.10387	0.012431	0.266271	0.192795	2.26196	0.248518	0.272344	0.288172	0.269912
ENSMUSG00000055538	Zcchc24	TRUE	-0.354041	0.782389	5.07047	0.012462	0.266626	33.7777	32.0552	22.7394	43.3445	35.3343	34.4947
ENSMUSG00000064036	Mro	TRUE	-0.711661	0.610617	0.978782	0.0125365	0.26776	1.77372	1.35717	1.52661	2.43014	3.30289	1.92537
ENSMUSG00000097131	AC120136.1	FALSE	-0.489234	0.712403	1.8966	0.012544	0.26776	3.50887	2.56355	3.19523	4.52509	4.30041	4.21062
ENSMUSG00000093126	Bc1	FALSE	-1.2427	0.422581	4.11115	0.0126451	0.269296	42.0101	5.25636	5.71591	31.5709	43.4918	50.3295
ENSMUSG00000030677	Kif22	TRUE	0.174588	1.12864	7.23703	0.0126358	0.269296	155.181	163.076	168.371	140.257	140.584	150.287
ENSMUSG00000040364	Sec1	TRUE	-0.791515	0.577737	-0.437797	0.0127496	0.269398	0.597665	0.560104	0.390528	0.87988	1.08619	0.719765
ENSMUSG00000022594	Lynx1	TRUE	-0.726591	0.60433	0.137172	0.0127638	0.269398	0.80974	0.646274	0.674548	1.55026	0.864516	1.11564
ENSMUSG00000032238	Rora	TRUE	-0.407689	0.75383	3.52155	0.0127103	0.269398	11.5099	9.56485	8.87563	13.5334	14.1204	12.092
ENSMUSG00000052957	Gas1	TRUE	-0.398714	0.758534	7.4314	0.0127263	0.269398	204.151	172.534	122.501	235.85	229.895	192.339
ENSMUSG00000022799	Arhgap31	TRUE	-0.305299	0.809275	5.49217	0.0127666	0.269398	47.4662	39.0996	37.3664	60.984	46.3957	45.777
ENSMUSG00000028070	Apoa1bp	TRUE	-0.258042	0.836222	5.13601	0.0127373	0.269398	30.5388	29.5132	36.0173	41.501	36.2875	37.1579
ENSMUSG00000063253	Scoc	TRUE	-0.21005	0.864507	5.873	0.0126847	0.269398	48.3531	54.287	55.1709	56.7522	62.7106	63.0694
ENSMUSG00000032373	Car12	TRUE	0.857396	1.81177	2.12216	0.0127268	0.269398	4.01014	3.64068	10.5798	2.63964	3.10339	4.31859
ENSMUSG00000087480	Gm15910	FALSE	-0.576676	0.670507	1.67255	0.0128075	0.269645	3.02689	3.05903	2.28991	4.92314	4.16741	3.40089
ENSMUSG00000036752	Tubb4b	TRUE	0.220679	1.16528	8.63367	0.0128009	0.269645	426.598	411.375	467.799	354.78	357.023	408.736
ENSMUSG00000089651	Gm16353	FALSE	1.3323	2.51804	-1.93378	0.0128598	0.270438	0.231354	0.215425	0.177513	0.104748	0.0665012	0.0719765
ENSMUSG00000020657	Dnajc27	TRUE	0.220055	1.16478	5.27303	0.0128948	0.270865	41.2775	42.0724	40.2776	34.3782	37.019	34.7466
ENSMUSG00000030247	Kcnj8	TRUE	-1.16887	0.44477	0.52398	0.0129466	0.271028	1.54236	0.517019	0.319523	2.2835	2.23887	0.845724
ENSMUSG00000078144	Capns2	TRUE	-0.851093	0.554365	-1.30084	0.0129241	0.271028	0.212075	0.215425	0.355025	0.41899	0.509843	0.503835
ENSMUSG00000088219	Gm22077	FALSE	0.610113	1.52638	0.409555	0.0129427	0.271028	1.36885	1.4218	1.89939	0.942728	0.975351	1.15162
ENSMUSG00000074852	Hpse2	TRUE	-1.00093	0.499677	0.282948	0.0129899	0.271317	0.366311	1.03404	0.266269	1.23602	1.01969	1.04366
ENSMUSG00000035551	Igfbpl1	TRUE	-0.287593	0.819268	6.88658	0.0129804	0.271317	117.836	109.586	91.6853	148.616	124.712	116.17
ENSMUSG00000045659	Plekha7	TRUE	0.217273	1.16253	6.08213	0.0130996	0.2733	73.3779	67.6218	84.4783	64.2522	63.021	66.7222
ENSMUSG00000019817	Plagl1	TRUE	-0.253471	0.838876	8.9526	0.0131294	0.273612	513.587	489.962	454.219	539.282	654.926	543.584
ENSMUSG00000024500	Ppp2r2b	TRUE	-0.911235	0.53173	2.97729	0.0132214	0.27522	9.94824	6.41965	2.50293	15.0208	12.8569	7.61151
ENSMUSG00000091509	Gm17066	FALSE	-0.378708	0.769126	3.9241	0.0132537	0.275581	17.4094	14.2827	12.0709	15.9845	20.305	20.5853
ENSMUSG00000029484	Anxa3	TRUE	-0.386171	0.765158	4.25357	0.0133222	0.276383	18.2192	18.5481	13.1359	27.0877	18.4652	19.6316
ENSMUSG00000025056	Nr0b1	TRUE	1.40495	2.64808	-0.187543	0.0133207	0.276383	0.327752	0.646274	2.0414	0.125697	0.487676	0.521829
ENSMUSG00000037475	Thoc2	TRUE	-0.189843	0.876701	7.35472	0.0133416	0.276475	165.361	164.24	146.554	170.131	191.102	181.849
ENSMUSG00000097391	Mirg	FALSE	0.446897	1.36311	4.53499	0.0134091	0.277563	18.3348	22.318	33.7807	15.9845	19.241	19.3977
ENSMUSG00000086681	Gm16178	FALSE	-1.00673	0.497673	-1.53598	0.0135184	0.279032	0.0771181	0.215425	0.266269	0.481839	0.332506	0.323894
ENSMUSG00000026816	Gtf3c5	TRUE	0.198237	1.1473	6.10662	0.0135254	0.279032	65.2419	71.9949	79.2771	62.8904	62.4003	63.4473
ENSMUSG00000029664	Tfpi2	TRUE	0.96898	1.95746	-1.19477	0.0135188	0.279032	0.385591	0.689359	0.497035	0.398041	0.243838	0.161947
ENSMUSG00000025083	Afap1l2	TRUE	-0.649805	0.637367	1.37021	0.0135785	0.279814	1.88939	2.02499	1.59761	3.64522	2.46054	2.53717
ENSMUSG00000019899	Lama2	TRUE	-0.715387	0.609042	4.38979	0.0136091	0.280112	22.0558	20.1637	7.7573	38.0653	23.3863	20.5853
ENSMUSG00000019256	Ahr	TRUE	-0.484355	0.714817	2.09637	0.0136233	0.280112	3.16184	3.59759	3.97628	5.94966	4.47775	4.60649
ENSMUSG00000050549	5730508B09Rik	TRUE	-0.542274	0.686687	1.56519	0.0136933	0.280287	2.75697	2.88669	1.88163	3.98041	3.72407	3.23894
ENSMUSG00000000078	Klf6	TRUE	-0.276889	0.825369	5.53835	0.013687	0.280287	47.5819	44.0974	35.9108	57.1712	51.9596	45.4531
ENSMUSG00000023411	Nfatc4	TRUE	-0.269631	0.829531	5.79016	0.0136669	0.280287	49.5098	49.8923	47.6621	70.2647	51.3389	55.6738
ENSMUSG00000027660	Skil	TRUE	-0.188989	0.87722	6.458	0.0137057	0.280287	78.7762	78.7161	75.1588	85.0969	91.4835	88.621
ENSMUSG00000034579	Pla2g3	TRUE	0.557746	1.47197	0.8214	0.0137077	0.280287	2.15931	1.93882	2.1124	1.31982	1.59603	1.31357
ENSMUSG00000019916	P4ha1	TRUE	-0.267888	0.830535	6.02559	0.0137574	0.280993	55.7178	55.041	73.863	79.4406	76.8089	66.1644
ENSMUSG00000063297	Luzp2	TRUE	-0.999161	0.500291	-0.505446	0.013916	0.28306	0.462709	0.280052	0.585792	1.34077	0.399007	0.935694
ENSMUSG00000035236	Scai	TRUE	-0.195985	0.872977	6.38175	0.0139506	0.28306	77.9664	79.7717	73.1707	83.0648	90.1756	91.2122
ENSMUSG00000020708	Psmc5	TRUE	0.201383	1.1498	7.53705	0.0138812	0.28306	173.844	189.466	212.483	162.631	164.923	173.229
ENSMUSG00000042729	Wdr74	TRUE	0.265137	1.20175	5.47738	0.0139237	0.28306	42.2029	47.5442	54.5851	40.0555	36.9525	43.0779
ENSMUSG00000028680	Plk3	TRUE	0.372644	1.29472	3.97951	0.0139453	0.28306	20.2435	16.3938	15.5146	11.4384	16.049	12.8118
ENSMUSG00000039221	Rpl22l1	TRUE	0.394112	1.31413	6.79208	0.0139234	0.28306	71.662	138.389	113.821	72.6739	88.1363	85.616
ENSMUSG00000026213	Stk11ip	TRUE	0.199551	1.14834	6.03979	0.0140032	0.283503	64.2587	69.5606	76.8807	62.1572	59.3856	61.9537
ENSMUSG00000007589	Tinf2	TRUE	0.212273	1.15851	5.80671	0.0139902	0.283503	57.4337	61.4606	62.804	50.7397	50.4744	55.5838
ENSMUSG00000073007	Fam46d	TRUE	-1.38712	0.382327	-2.3432	0.0141729	0.284469	0.0771181	0.0861698	0.0710051	0.146647	0.199504	0.269912
ENSMUSG00000028801	Stpg1	TRUE	-0.92352	0.527221	-0.866078	0.0141741	0.284469	0.269913	0.301594	0.603543	0.984627	0.53201	0.737759
ENSMUSG00000034227	Foxj1	TRUE	-0.615741	0.652595	3.73766	0.014133	0.284469	13.9777	7.60449	11.5916	23.8824	11.7929	15.187
ENSMUSG00000033454	Zbtb1	TRUE	-0.212467	0.86306	5.5743	0.014146	0.284469	44.1116	45.5623	42.6385	48.3305	54.8635	50.1136
ENSMUSG00000017221	Psmd3	TRUE	0.183464	1.13561	7.42755	0.0141175	0.284469	178.741	179.363	199.861	159.97	160.135	171.232
ENSMUSG00000097195	Snhg5	FALSE	0.208256	1.15529	6.04773	0.0140909	0.284469	65.2419	70.5731	71.1116	55.3067	60.2501	63.5192
ENSMUSG00000028884	Rpa2	TRUE	0.229436	1.17238	7.13172	0.0141604	0.284469	130.677	149.849	160.596	116.919	122.517	136.791
ENSMUSG00000040767	Snrnp25	TRUE	0.276289	1.21108	4.85996	0.0141658	0.284469	26.4901	31.8182	32.9996	25.9145	23.8074	25.6596
ENSMUSG00000042807	Hecw2	TRUE	-0.364906	0.77652	3.59608	0.0142326	0.284813	11.4328	10.0603	10.42	16.4035	12.0589	12.6499
ENSMUSG00000087060	2810442I21Rik	FALSE	-0.313223	0.804842	3.82201	0.0142199	0.284813	11.2785	13.6364	12.4081	15.8588	15.1623	15.331
ENSMUSG00000032633	Flcn	TRUE	0.235083	1.17697	5.29441	0.0142684	0.284813	38.0192	41.9863	42.8693	33.5192	35.024	35.8443
ENSMUSG00000067321	Gm7931	FALSE	0.725967	1.65401	-0.248153	0.0142498	0.284813	0.790461	1.09867	0.692299	0.544687	0.620678	0.395871
ENSMUSG00000065642	Snora69	FALSE	0.861876	1.8174	-0.506679	0.0142592	0.284813	0.520547	0.797071	0.923066	0.230445	0.53201	0.467847
ENSMUSG00000074733	5830428H23Rik	FALSE	-0.289012	0.818462	4.55098	0.014326	0.285653	21.2846	21.8871	19.0471	27.2553	23.4084	25.3177
ENSMUSG00000090340	C030048H21Rik	TRUE	-2.25921	0.208886	-3.25128	0.0143533	0.285869	0.0385591	0.0215425	0	0.209495	0.0665012	0.0359882
ENSMUSG00000032487	Ptgs2	TRUE	-1.24841	0.42091	-2.00899	0.0143678	0.285869	0.173516	0.150797	0.106508	0.502788	0.199504	0.323894
ENSMUSG00000068396	Rpl34-ps1	FALSE	0.694617	1.61845	1.45094	0.0144307	0.286812	2.42922	5.62258	2.64494	2.26255	1.90637	2.41121
ENSMUSG00000003970	Rpl8	TRUE	0.268065	1.20419	9.84056	0.0144918	0.287717	885.74	963.939	1086.75	787.911	781.234	869.35
ENSMUSG00000026701	Prdx6	TRUE	0.221954	1.16631	7.4952	0.0145601	0.288762	169.409	202.542	213.441	161.605	163.26	177.026
ENSMUSG00000018501	Ncor1	TRUE	-0.200596	0.870191	8.34224	0.014578	0.288771	343.214	301.508	318.901	364.794	385.907	356.733
ENSMUSG00000037376	Trmt6	TRUE	0.223839	1.16784	6.07847	0.0145918	0.288771	64.008	73.1582	77.502	56.7313	62.7106	64.365
ENSMUSG00000022514	Il1rap	TRUE	-0.482476	0.715748	2.6005	0.0146458	0.289336	5.68746	4.67471	5.25437	8.94544	5.60827	7.26962
ENSMUSG00000035228	Ccdc106	TRUE	-0.465864	0.724038	2.46057	0.0146517	0.289336	4.06798	4.61009	5.04136	6.4315	6.00728	6.51387
ENSMUSG00000080268	Brms1	TRUE	0.242651	1.18316	5.22733	0.0147046	0.29007	39.5038	39.2934	42.4788	32.3879	35.29	34.8366
ENSMUSG00000094392	Gm3788	FALSE	-1.03164	0.489153	-1.2349	0.0147333	0.290327	0.231354	0.387764	0.248518	0.963678	0.509843	0.3059
ENSMUSG00000004127	Trmt10a	TRUE	0.269523	1.20541	5.02855	0.0147605	0.290551	32.486	35.3081	37.8989	26.124	30.1472	31.3997
ENSMUSG00000033762	Recql4	TRUE	0.245176	1.18524	5.31366	0.0147858	0.290741	41.2775	43.0849	46.0468	33.9801	37.152	38.8853
ENSMUSG00000056004	9330182L06Rik	TRUE	-0.382412	0.767154	2.99626	0.0148661	0.292008	6.4972	7.32444	6.97625	9.21779	8.889	8.99706
ENSMUSG00000030235	Slco1c1	TRUE	-0.95745	0.514966	-1.05212	0.0149457	0.292647	0.385591	0.107712	0.28402	0.607536	0.443341	0.485841
ENSMUSG00000027848	Olfml3	TRUE	-0.45705	0.728474	3.28627	0.0149355	0.292647	10.5266	7.79837	6.60347	14.099	10.0639	10.0587
ENSMUSG00000022476	Polr3h	TRUE	0.262428	1.1995	4.62055	0.0149462	0.292647	24.9092	26.7342	26.2541	20.0696	21.7016	23.1404
ENSMUSG00000092094	Zfp804b	TRUE	-1.16751	0.445189	-1.54991	0.0149712	0.292826	0.327752	0.0430849	0.177513	0.670384	0.266005	0.323894
ENSMUSG00000046185	Zfp84	TRUE	-0.256648	0.83703	4.82703	0.0150756	0.293133	27.936	24.0414	25.4021	32.1785	30.2802	30.0142
ENSMUSG00000064037	Gpn1	TRUE	0.193526	1.14355	6.06628	0.0150494	0.293133	64.143	72.4688	73.721	58.5329	61.3806	63.9871
ENSMUSG00000053137	Mapk11	TRUE	0.204115	1.15198	5.82512	0.0150813	0.293133	58.3013	61.0729	58.3307	47.723	55.0187	51.5172
ENSMUSG00000025967	Eef1b2	TRUE	0.26855	1.2046	9.17327	0.0150374	0.293133	562.172	596.834	687.595	472.851	491.422	568.668
ENSMUSG00000046580	Gm7862	FALSE	0.54167	1.45566	1.38603	0.0150821	0.293133	2.02435	2.97286	3.01771	1.71786	1.8177	1.96136
ENSMUSG00000066687	Zbtb16	TRUE	0.864054	1.82015	4.56884	0.0150297	0.293133	15.4236	19.5821	57.8514	15.0627	12.3027	23.6443
ENSMUSG00000038520	Tbc1d17	TRUE	0.248775	1.1882	4.84665	0.0151129	0.293423	29.4977	31.1719	31.2422	26.5011	25.2261	25.6236
ENSMUSG00000097930	AC132389.1	FALSE	2.22892	4.68781	-3.35776	0.0151473	0.293781	0.192795	0.280052	0.0355025	0.0837981	0	0.0179941
ENSMUSG00000040472	Rabggta	TRUE	0.277006	1.21168	4.24812	0.0151833	0.294171	19.3374	19.9052	20.9997	16.7806	16.7583	16.1947
ENSMUSG00000045438	Cox19	TRUE	0.225324	1.16904	5.24962	0.0152364	0.29489	37.0553	42.7833	38.467	33.624	33.5831	33.9549
ENSMUSG00000064398	Gm23628	FALSE	-1.43972	0.368638	-2.84539	0.0155353	0.295769	0.0578386	0.0861698	0.0532538	0.104748	0.177337	0.251918
ENSMUSG00000064288	Hist1h4k	TRUE	-0.785799	0.580031	-0.701213	0.0155314	0.295769	0.289193	0.344679	0.461533	0.649435	0.665012	0.593806
ENSMUSG00000050896	Rtn4rl2	TRUE	-0.741959	0.597927	0.756512	0.0155058	0.295769	1.73516	1.55106	0.781056	2.17875	2.50488	2.10531
ENSMUSG00000028360	Slc44a5	TRUE	-0.616936	0.652054	2.36756	0.0154239	0.295769	4.54997	4.7178	2.8047	6.93429	6.49495	5.07434
ENSMUSG00000029206	Nsun7	TRUE	-0.57405	0.671728	1.06437	0.0154777	0.295769	1.71588	1.44334	1.77513	3.16338	1.9507	2.24926
ENSMUSG00000040407	Akap9	TRUE	-0.222734	0.85694	7.58204	0.0154054	0.295769	200.854	164.089	180.353	228.832	207.395	200.167
ENSMUSG00000040651	D14Abb1e	TRUE	-0.192987	0.874793	6.35946	0.0155377	0.295769	77.7929	83.6278	68.3424	84.4684	91.4835	86.6237
ENSMUSG00000056211	R3hdm1	TRUE	-0.161508	0.89409	6.95916	0.0155208	0.295769	129.886	119.819	121.756	134.622	144.13	136.755
ENSMUSG00000025651	Uqcrc1	TRUE	0.174993	1.12896	7.31117	0.0154484	0.295769	155.489	166.071	175.169	144.887	142.49	152.59
ENSMUSG00000024493	Lars	TRUE	0.176982	1.13052	6.95214	0.0155381	0.295769	123.003	126.82	140.554	112.206	110.725	122.36
ENSMUSG00000036270	Edc4	TRUE	0.18396	1.136	6.66189	0.0154795	0.295769	99.4245	104.653	116.431	95.3203	91.5057	95.3328
ENSMUSG00000022551	Cyc1	TRUE	0.191159	1.14168	6.9184	0.0153283	0.295769	113.017	127.337	134.555	107.345	105.537	115.468
ENSMUSG00000021764	Ndufs4	TRUE	0.198011	1.14712	6.06309	0.0154894	0.295769	63.2176	71.2625	68.8571	56.6684	57.0359	63.4832
ENSMUSG00000039356	Exosc2	TRUE	0.254859	1.19322	6.07562	0.015485	0.295769	61.386	67.9665	83.8037	54.6154	59.5408	64.4909
ENSMUSG00000081999	Gm13461	FALSE	0.504799	1.41893	1.68091	0.0154061	0.295769	3.33536	4.04998	3.497	2.3673	2.17237	3.09499
ENSMUSG00000073418	C4b	TRUE	2.73577	6.66114	-3.29115	0.0153476	0.295769	0.462709	0.129255	0	0	0.0665012	0.0179941
ENSMUSG00000045102	Poln	TRUE	0.617952	1.53469	0.739357	0.0156158	0.296749	2.31354	1.93882	1.54436	1.29887	1.15269	1.31357
ENSMUSG00000097084	FOXL1	TRUE	1.67717	3.198	-1.17408	0.0156217	0.296749	0.154236	0.280052	1.01182	0.251394	0.110835	0.0899706
ENSMUSG00000071867	Gm6304	FALSE	-1.02578	0.491145	-1.56475	0.0157935	0.297844	0.42415	0.150797	0.28402	0.837981	0.620678	0.323894
ENSMUSG00000025330	Padi4	TRUE	-0.646856	0.638671	0.905139	0.0158111	0.297844	1.67732	1.74494	1.40235	2.2416	2.88172	2.42921
ENSMUSG00000069755	Zfp125	TRUE	-0.507345	0.703516	3.32191	0.0158407	0.297844	5.39827	6.76433	11.2365	9.88817	11.4825	11.9301
ENSMUSG00000020737	Hn1	TRUE	0.185824	1.13747	8.26343	0.0157211	0.297844	299.816	333.779	315.458	274.774	272.81	286.718
ENSMUSG00000047832	Cdca4	TRUE	0.189809	1.14061	6.91652	0.0157564	0.297844	114.752	131.344	129.211	104.475	107.377	117.124
ENSMUSG00000020534	Shmt1	TRUE	0.220456	1.1651	6.39099	0.0157292	0.297844	80.3571	91.4262	99.4603	69.7619	83.6585	79.408
ENSMUSG00000049916	2610318N02Rik	TRUE	0.255046	1.19337	5.94319	0.0158333	0.297844	61.039	62.4947	79.9339	51.2216	56.792	62.4936
ENSMUSG00000049897	Gm711	TRUE	0.837707	1.78721	-1.03119	0.0157061	0.297844	0.501268	0.473934	0.639045	0.251394	0.266005	0.377876
ENSMUSG00000018924	Alox15	TRUE	1.3152	2.48836	-2.23608	0.015786	0.297844	0.443429	0.215425	0.159761	0.146647	0.0886683	0.0899706
ENSMUSG00000033427	Upb1	TRUE	1.44017	2.71353	-2.86547	0.0158062	0.297844	0.115677	0.193882	0.301771	0.0837981	0.0665012	0.0719765
ENSMUSG00000026192	Atic	TRUE	0.226135	1.1697	7.083	0.0158788	0.298257	132.952	146.295	170.022	118.868	131.761	133.48
ENSMUSG00000071647	Eml3	TRUE	0.286181	1.21941	4.99398	0.0159784	0.299823	31.9269	32.3352	42.1237	27.2344	29.061	30.9679
ENSMUSG00000044600	Smim7	TRUE	0.218388	1.16343	6.50649	0.0160054	0.300023	77.1374	98.5783	96.5136	74.8945	78.6488	80.4157
ENSMUSG00000030074	Gxylt2	TRUE	-0.651284	0.636713	0.812415	0.0161002	0.301402	1.38813	1.68031	1.13608	2.95388	1.48519	2.1413
ENSMUSG00000045464	2810002D19Rik	FALSE	-0.34617	0.78667	3.36483	0.0161116	0.301402	9.48553	8.33693	9.26616	12.2136	11.2165	11.0304
ENSMUSG00000006057	Atp5g1	TRUE	0.206009	1.15349	6.28589	0.0161992	0.301626	72.3753	82.7446	88.9871	68.7982	66.6342	76.1511
ENSMUSG00000018882	Mrpl45	TRUE	0.218574	1.16358	5.98125	0.0162052	0.301626	62.5813	67.2125	73.0464	57.4436	55.994	60.8741
ENSMUSG00000029521	Chek2	TRUE	0.229689	1.17258	5.13656	0.0161613	0.301626	37.2866	37.4839	37.5262	29.1617	33.7826	32.8213
ENSMUSG00000047215	Rpl9	TRUE	0.28274	1.2165	9.50896	0.0161883	0.301626	602.755	792.181	825.522	599.051	599.752	626.465
ENSMUSG00000035150	Eif2s3x	TRUE	0.374029	1.29597	7.25243	0.0161894	0.301626	182.249	184.662	192.051	116.856	123.182	191.205
ENSMUSG00000022754	Tmem45a	TRUE	-0.577565	0.670094	0.733402	0.0162862	0.302219	1.11821	1.29255	1.26034	2.17875	1.70686	1.60148
ENSMUSG00000006586	Runx1t1	TRUE	-0.455192	0.729413	4.27702	0.0162742	0.302219	18.7783	18.1818	10.0295	24.3433	20.97	19.0738
ENSMUSG00000010048	Ifrd2	TRUE	0.272641	1.20802	4.95113	0.0162826	0.302219	30.346	31.9475	37.7037	27.3601	26.6892	28.7366
ENSMUSG00000027285	Haus2	TRUE	0.240336	1.18127	5.79893	0.016313	0.302412	56.2769	62.8609	54.5319	41.6476	51.1394	54.1623
ENSMUSG00000029404	Arl6ip4	TRUE	0.224193	1.16812	5.64204	0.0163369	0.302552	50.8787	50.1293	56.9461	41.899	46.9942	46.3528
ENSMUSG00000073682	Gm10563	TRUE	-0.972049	0.509781	-2.03351	0.0163567	0.302553	0.212075	0.215425	0.159761	0.335192	0.421174	0.395871
ENSMUSG00000079084	Ccdc82	TRUE	-0.375551	0.770811	3.65318	0.0163697	0.302553	13.9005	10.5343	9.35492	13.9105	15.4948	14.4313
ENSMUSG00000062963	Ufc1	TRUE	0.192755	1.14294	5.82213	0.0163904	0.302633	57.6651	59.7372	57.4253	51.5777	49.0336	52.3089
ENSMUSG00000024844	Banf1	TRUE	0.192801	1.14298	7.23419	0.0165486	0.304976	144.847	160.448	168.832	134.747	136.859	143.197
ENSMUSG00000020692	Nle1	TRUE	0.302161	1.23299	4.82126	0.0165504	0.304976	25.9695	31.6028	33.8162	22.4579	25.3813	26.2714
ENSMUSG00000031698	Mylk3	TRUE	-0.7798	0.582447	0.939767	0.016603	0.305033	2.06291	1.09867	0.887563	2.63964	1.97287	2.33924
ENSMUSG00000058587	Tmod3	TRUE	-0.202949	0.868773	6.91271	0.0165949	0.305033	123.235	122.103	97.1349	127.897	133.512	132.707
ENSMUSG00000034777	Vax2	TRUE	3.0061	8.03389	-1.83014	0.0165875	0.305033	0.0192795	0.0430849	0.319523	0	0.0443341	0
ENSMUSG00000048747	E130114P18Rik	TRUE	-0.765098	0.588413	4.29904	0.0166678	0.305115	23.9259	19.3451	6.63897	30.9215	34.1151	19.7755
ENSMUSG00000052397	Ezr	TRUE	-0.416854	0.749056	7.44107	0.0167491	0.305115	169.081	114.821	200.181	279.362	165.477	201.48
ENSMUSG00000068699	Flnc	TRUE	-0.40711	0.754133	4.58112	0.0167562	0.305115	25.2755	19.1943	20.4672	36.8083	23.7853	25.5337
ENSMUSG00000034973	Dopey1	TRUE	-0.304017	0.809994	4.80828	0.0166788	0.305115	29.8062	24.623	22.1181	34.441	31.2999	28.7726
ENSMUSG00000042508	Dmtf1	TRUE	-0.161149	0.894313	6.8608	0.0166262	0.305115	112.978	105.429	110.076	117.611	129.434	120.327
ENSMUSG00000032867	Fbxw8	TRUE	0.177603	1.131	6.54964	0.0167421	0.305115	93.1587	97.2857	105.922	90.8999	84.124	87.0375
ENSMUSG00000030091	Nup210	TRUE	0.193098	1.14322	6.9344	0.016712	0.305115	130.426	133.305	153.371	114.761	128.237	121.91
ENSMUSG00000040312	Cchcr1	TRUE	0.224454	1.16834	5.32124	0.0167156	0.305115	42.0679	42.9987	42.6208	37.0597	36.6643	35.5744
ENSMUSG00000021018	Polr2h	TRUE	0.258749	1.19644	5.68345	0.0167484	0.305115	44.9213	53.3391	60.6916	42.2971	43.6248	46.9287
ENSMUSG00000027367	Stard7	TRUE	0.181798	1.1343	7.29458	0.0168041	0.305685	150.785	171.844	161.59	135.501	141.027	150.287
ENSMUSG00000029811	Abp1	TRUE	2.61921	6.14413	-3.48863	0.0168231	0.305731	0.347032	0.0646274	0	0.0209495	0.0221671	0.0179941
ENSMUSG00000019936	Epyc	TRUE	-1.15673	0.448528	-0.66678	0.0170434	0.307448	0.443429	0.581646	0.106508	1.29887	0.465508	0.737759
ENSMUSG00000030157	Clec2d	TRUE	-0.837372	0.559662	-0.879258	0.0170034	0.307448	0.250634	0.452392	0.337274	0.523738	0.798015	0.539824
ENSMUSG00000046080	Clec9a	TRUE	-0.541783	0.686921	1.03578	0.0170416	0.307448	1.34957	1.85265	1.57986	2.45109	2.46054	2.05133
ENSMUSG00000028289	Epha7	TRUE	-0.326741	0.797335	6.3337	0.0170508	0.307448	60.7305	72.5119	88.0108	113.903	73.4395	90.1685
ENSMUSG00000089774	Slc5a3	TRUE	-0.282718	0.822041	4.95193	0.0170497	0.307448	23.6367	29.8578	30.8872	30.9215	35.9328	35.7903
ENSMUSG00000029814	Igf2bp3	TRUE	0.227857	1.17109	7.30806	0.0170035	0.307448	157.379	160.211	190.755	134.307	143.421	156.351
ENSMUSG00000022550	Adck5	TRUE	0.277698	1.21226	4.22201	0.0169402	0.307448	18.4698	20.6161	21.5855	17.1786	16.3371	16.5366
ENSMUSG00000065979	Cpped1	TRUE	0.322836	1.25079	4.15362	0.0169991	0.307448	22.0943	20.9608	15.8164	16.0054	15.9825	15.0611
ENSMUSG00000022770	Dlg1	TRUE	-0.171415	0.887971	7.26606	0.0170677	0.307451	141.396	145.476	156.229	168.916	166.32	163.818
ENSMUSG00000042766	Trim46	TRUE	-0.473046	0.720442	3.82679	0.0171462	0.308459	14.5946	11.676	9.60343	17.43	17.9775	14.3953
ENSMUSG00000038172	Ttc39b	TRUE	-0.420442	0.747195	3.16649	0.0171737	0.308459	9.11922	8.29385	6.24844	10.8099	11.4604	9.39293
ENSMUSG00000085744	Gm12259	FALSE	1.50811	2.84438	-2.89024	0.0171727	0.308459	0.192795	0.280052	0.124259	0.0837981	0.0665012	0.0539824
ENSMUSG00000085331	Gm11274	FALSE	-1.24885	0.420784	-2.45967	0.0172991	0.308648	0.115677	0.0215425	0.106508	0.251394	0.155169	0.197935
ENSMUSG00000021876	Rnase4	TRUE	-0.491549	0.711261	2.05779	0.01739	0.308648	3.50887	3.36062	2.98221	5.86586	4.23391	3.76077
ENSMUSG00000081094	Rpl19-ps11	FALSE	-0.439111	0.737589	2.18015	0.0172743	0.308648	5.14763	3.89919	3.97628	6.09631	5.7191	5.84809
ENSMUSG00000044456	Rin3	TRUE	-0.39318	0.76145	2.9632	0.0173942	0.308648	7.13343	7.17364	6.31945	10.5376	8.48999	8.06136
ENSMUSG00000029005	Draxin	TRUE	-0.364789	0.776582	4.82368	0.017393	0.308648	24.003	19.6467	31.7925	35.7189	27.8862	33.595
ENSMUSG00000062127	Cttnbp2nl	TRUE	-0.172279	0.88744	6.45993	0.0172558	0.308648	88.9557	83.9079	77.9813	92.6806	94.4982	95.4408
ENSMUSG00000001424	Snd1	TRUE	0.172146	1.12673	7.3054	0.0174016	0.308648	158.246	163.27	177.956	148.783	142.224	152.284
ENSMUSG00000036940	Kdm1a	TRUE	0.173432	1.12774	7.76836	0.0172521	0.308648	215.776	229.406	239.766	194.663	207.129	205.583
ENSMUSG00000018921	Pelp1	TRUE	0.190291	1.14099	6.5223	0.0173593	0.308648	95.7036	93.839	110.235	82.583	86.7176	93.4435
ENSMUSG00000027597	Ahcy	TRUE	0.283201	1.21689	7.2927	0.0173397	0.308648	151.865	157.755	208.808	128.064	138.988	158.978
ENSMUSG00000015542	Nat9	TRUE	0.346427	1.27141	3.14784	0.0172936	0.308648	10.5266	10.0603	11.3608	8.21221	8.46782	8.45724
ENSMUSG00000063804	Lin28b	TRUE	0.554238	1.46839	6.70098	0.0173326	0.308648	80.2414	104.502	168.85	59.9994	77.2744	103.52
ENSMUSG00000047415	Gpr68	TRUE	0.888895	1.85176	-1.33626	0.0173501	0.308648	0.520547	0.387764	0.550289	0.146647	0.354673	0.287906
ENSMUSG00000029223	Uchl1	TRUE	0.186494	1.13799	6.66672	0.0174672	0.309516	107.059	109.867	98.2887	92.4293	98.5548	86.0299
ENSMUSG00000031432	Prps1	TRUE	0.214115	1.15999	6.10188	0.0174994	0.309787	69.8883	76.3034	79.9339	57.9045	66.8116	70.1951
ENSMUSG00000002844	Adprh	TRUE	0.175994	1.12974	6.73493	0.0175445	0.310222	104.611	112.689	120.283	101.458	94.4096	102.926
ENSMUSG00000095440	Fignl2	TRUE	0.647614	1.56657	5.12882	0.0175743	0.310222	25.0055	32.4645	58.4727	18.9803	22.6326	32.3894
ENSMUSG00000083116	Gm13410	FALSE	1.81693	3.52331	-1.71814	0.0175631	0.310222	0.134957	0.0646274	1.50886	0.209495	0.110835	0.161947
ENSMUSG00000044313	Mab21l3	TRUE	0.498115	1.41237	1.76482	0.0176169	0.310405	4.74276	3.72685	3.63901	3.22623	2.46054	2.87906
ENSMUSG00000062432	Cyp26c1	TRUE	1.54092	2.9098	-2.0968	0.0176183	0.310405	0.0385591	0.215425	0.28402	0.0837981	0.0221671	0.0719765
ENSMUSG00000072722	Gm6588	TRUE	-1.36059	0.389423	-2.28377	0.0177195	0.311306	0.192795	0.0646274	0.0887563	0.356142	0.37684	0.179941
ENSMUSG00000033022	Cdo1	TRUE	-0.560355	0.678135	3.77262	0.01772	0.311306	14.3632	12.7101	6.67447	21.5989	15.1401	13.0097
ENSMUSG00000022201	Zfr	TRUE	-0.177062	0.884502	7.86036	0.0177109	0.311306	232.974	219.69	214.169	237.63	262.613	253.663
ENSMUSG00000035215	Lsm7	TRUE	0.243854	1.18415	5.23751	0.0177809	0.312078	33.8741	39.3581	42.9936	33.6659	31.1226	33.3611
ENSMUSG00000019863	Qrsl1	TRUE	0.24728	1.18697	4.81733	0.0178266	0.312583	29.1314	30.3102	28.2423	24.6995	25.6251	23.5543
ENSMUSG00000029388	Eif2b1	TRUE	0.211468	1.15787	5.73825	0.0178649	0.312661	52.5174	56.1181	60.088	48.4353	46.8169	50.4555
ENSMUSG00000044518	Foxe3	TRUE	3.83683	14.289	-3.0358	0.017848	0.312661	0	0.0430849	0.0532538	0	0	0
ENSMUSG00000041638	Gcn1l1	TRUE	0.191096	1.14163	7.52572	0.017904	0.312752	177.14	192.266	213.778	168.518	174.787	167.579
ENSMUSG00000001056	Nhp2	TRUE	0.229275	1.17225	6.10876	0.0179031	0.312752	69.6955	73.5675	79.5434	60.4393	62.1343	67.4779
ENSMUSG00000074886	Grk6	TRUE	0.161878	1.11874	7.03496	0.0179809	0.312911	134.398	140.608	142.667	116.982	127.993	128.352
ENSMUSG00000033658	Ddx19b	TRUE	0.177824	1.13118	6.06673	0.0179705	0.312911	71.1993	68.225	69.656	56.8151	65.8362	62.2057
ENSMUSG00000091387	Gcnt4	TRUE	0.709618	1.63537	-0.228903	0.0179612	0.312911	1.07965	0.818613	1.02957	0.398041	0.687179	0.701771
ENSMUSG00000080951	Gm12208	FALSE	0.778706	1.71559	-0.781339	0.0179304	0.312911	0.597665	0.560104	0.550289	0.251394	0.421174	0.323894
ENSMUSG00000054428	Atpif1	TRUE	-0.248776	0.84161	4.99047	0.0180016	0.312977	29.8447	28.8884	29.3783	37.772	34.492	32.4614
ENSMUSG00000060780	Lrrtm1	TRUE	0.600038	1.51576	2.68452	0.01802	0.313002	9.31201	7.32444	4.82834	4.4413	4.18958	5.5062
ENSMUSG00000084593	Gm22345	FALSE	-1.13316	0.455914	-2.0935	0.018128	0.314454	0.154236	0.107712	0.14201	0.251394	0.243838	0.395871
ENSMUSG00000060131	Atp8b4	TRUE	-1.05765	0.480413	-1.06703	0.0181435	0.314454	0.289193	0.301594	0.159761	0.481839	0.554177	0.521829
ENSMUSG00000020460	Rps27a	TRUE	0.270267	1.20603	9.60849	0.0181547	0.314454	722.23	824.258	883.96	621.656	649.052	744.507
ENSMUSG00000022860	Chodl	TRUE	-0.999062	0.500325	0.295506	0.01819	0.314475	0.674783	1.05558	0.603543	0.984627	2.66005	1.02566
ENSMUSG00000000567	Sox9	TRUE	-0.344922	0.78735	6.7134	0.01818	0.314475	122.907	111.224	72.1234	117.464	149.295	122.18
ENSMUSG00000030002	Dusp11	TRUE	-0.163892	0.892614	7.45474	0.0182673	0.315517	167.462	171.176	168.175	183.476	196.334	187.985
ENSMUSG00000061808	Ttr	TRUE	-2.16761	0.22258	-0.740251	0.018389	0.316882	0.501268	0.0215425	0.106508	2.49299	0.155169	0.215929
ENSMUSG00000021573	Tppp	TRUE	-0.504317	0.704994	2.54702	0.0184397	0.316882	5.10907	5.19173	3.94078	6.5572	7.98015	5.66815
ENSMUSG00000020108	Ddit4	TRUE	-0.368386	0.774649	5.96058	0.0184142	0.316882	63.0633	56.0319	46.7568	80.2785	80.9541	52.9027
ENSMUSG00000020048	Hsp90b1	TRUE	-0.236144	0.849012	9.26034	0.0184197	0.316882	563.56	547.415	611.105	662.822	652.953	712.567
ENSMUSG00000027951	Adar	TRUE	0.163134	1.11972	6.49378	0.0184493	0.316882	92.6767	91.3616	95.3775	84.8036	83.4812	81.2974
ENSMUSG00000029363	Rfc5	TRUE	0.184443	1.13638	6.48376	0.0183709	0.316882	89.3221	96.6826	101.005	81.2841	81.3753	89.8626
ENSMUSG00000022394	L3mbtl2	TRUE	0.232066	1.17452	5.54656	0.0185047	0.317288	46.4251	49.2461	55.8277	41.9409	40.7874	46.2449
ENSMUSG00000026520	Pycr2	TRUE	0.238408	1.17969	5.64675	0.0185073	0.317288	44.9984	55.6873	53.8928	42.6951	41.9401	46.3528
ENSMUSG00000091243	Vgll3	TRUE	-0.712275	0.610357	1.1522	0.0185542	0.317502	1.98579	2.00345	1.40235	4.1899	2.81522	1.8354
ENSMUSG00000070713	Gm10282	TRUE	0.339848	1.26562	3.48935	0.0185533	0.317502	11.9919	11.913	10.7218	7.87702	9.59834	9.86078
ENSMUSG00000071516	Hist1h2ai	TRUE	-0.907733	0.533022	-1.13818	0.0186278	0.31752	0.134957	0.409307	0.266269	0.544687	0.421174	0.539824
ENSMUSG00000053835	H2-T24	TRUE	-0.468874	0.722528	2.85148	0.0186584	0.31752	8.79146	5.5795	5.48514	8.90354	10.3964	8.20532
ENSMUSG00000026840	Lamc3	TRUE	-0.430666	0.741919	4.77557	0.0186189	0.31752	27.1456	24.3861	20.2542	42.9256	24.6498	29.1685
ENSMUSG00000034674	Tdg	TRUE	-0.265974	0.831637	7.27541	0.0186453	0.31752	118.01	172.124	114.123	156.723	164.524	164.736
ENSMUSG00000032740	Ccdc88a	TRUE	-0.17869	0.883505	7.17729	0.0186117	0.31752	147.7	140.048	125.75	153.979	156.234	157.754
ENSMUSG00000027540	Ptpn1	TRUE	0.161958	1.1188	6.54742	0.0186345	0.31752	99.4631	97.415	95.2355	85.1807	84.257	91.5901
ENSMUSG00000040280	Ndufa4l2	TRUE	-0.904975	0.534042	-0.390634	0.0187472	0.318737	0.713343	0.710901	0.248518	1.13127	1.21919	0.773747
ENSMUSG00000028099	Polr3c	TRUE	0.181971	1.13443	5.88026	0.0187821	0.319037	62.5235	60.5989	62.7507	51.5358	54.9078	57.3832
ENSMUSG00000052229	Gpr17	TRUE	1.28924	2.44399	0.0389993	0.0188564	0.320004	0.578386	0.344679	1.54436	0.314243	0.354673	0.341888
ENSMUSG00000003868	Ruvbl2	TRUE	0.179672	1.13263	7.23441	0.0188941	0.320349	152.135	150.517	175.453	135.941	139.209	146.994
ENSMUSG00000002343	Armc6	TRUE	0.260548	1.19793	4.20958	0.018916	0.320427	19.4338	19.7329	18.8163	16.1311	15.4726	16.7705
ENSMUSG00000039153	Runx2	TRUE	-0.889776	0.539698	-0.460643	0.01895	0.320606	0.385591	0.323137	0.798807	1.40362	0.576344	0.845724
ENSMUSG00000063904	Dpp3	TRUE	0.169462	1.12464	7.22764	0.0189613	0.320606	148.298	155.084	167.483	141.598	135.153	141.938
ENSMUSG00000047330	Kcne4	TRUE	-1.11389	0.462046	-1.24872	0.0190026	0.320698	0.327752	0.301594	0.0532538	0.712283	0.509843	0.251918
ENSMUSG00000020953	Coch	TRUE	-0.494617	0.70975	1.74524	0.0191956	0.320698	2.79553	3.12366	2.53843	4.1061	3.61323	4.17464
ENSMUSG00000050621	Gm9846	TRUE	-0.468596	0.722668	1.72234	0.0192462	0.320698	3.27752	2.95132	2.92896	4.71364	4.10091	3.86874
ENSMUSG00000061411	8430427H17Rik	TRUE	-0.340432	0.789805	5.68142	0.0191488	0.320698	55.0623	48.5567	33.8339	60.8374	60.0728	53.1006
ENSMUSG00000046785	Epm2aip1	TRUE	-0.16452	0.892225	7.36561	0.0192621	0.320698	153.272	156.872	147.335	162.463	179.531	170.728
ENSMUSG00000000399	Ndufa9	TRUE	0.169245	1.12447	6.36067	0.0190549	0.320698	80.4535	85.0065	91.0995	75.4182	74.9025	77.8426
ENSMUSG00000034032	Rpap1	TRUE	0.174586	1.12864	6.3691	0.0191674	0.320698	91.867	84.7696	91.3658	79.0425	77.2301	81.1895
ENSMUSG00000023104	Rfc2	TRUE	0.174978	1.12895	7.00417	0.0191743	0.320698	120.092	135.007	142.88	116.291	113.939	122.27
ENSMUSG00000069744	Psmb3	TRUE	0.194397	1.14425	6.95604	0.019188	0.320698	107.426	127.467	136.738	109.524	103.808	111.438
ENSMUSG00000015776	Med22	TRUE	0.205167	1.15282	6.46387	0.0191069	0.320698	75.5372	90.8661	97.4722	76.4867	72.4198	79.9659
ENSMUSG00000009640	Dmap1	TRUE	0.213219	1.15927	5.22888	0.0190424	0.320698	38.1927	41.4692	39.1415	35.9284	32.8294	33.703
ENSMUSG00000001642	Akr1b3	TRUE	0.244904	1.18501	6.57039	0.01902	0.320698	89.6691	96.9195	118.081	79.3568	83.8137	93.9293
ENSMUSG00000028234	Rps20	TRUE	0.247164	1.18687	9.2204	0.0192317	0.320698	538.227	630.44	663.702	508.214	499.734	535.901
ENSMUSG00000044702	Palb2	TRUE	0.257282	1.19523	4.82645	0.0192318	0.320698	27.2805	33.2185	32.1475	24.8671	25.9576	26.6673
ENSMUSG00000028540	Dph2	TRUE	0.265445	1.20201	4.7198	0.0192421	0.320698	24.2922	28.4791	28.9346	22.1227	22.1892	23.6443
ENSMUSG00000041658	Rragb	TRUE	0.332165	1.2589	5.65803	0.0191196	0.320698	46.7143	55.0194	68.6441	37.3949	47.8144	50.1316
ENSMUSG00000054667	Irs4	TRUE	1.25761	2.39099	5.06508	0.0191297	0.320698	12.1268	17.8156	94.0462	13.6172	15.3839	22.8525
ENSMUSG00000001833	2014-09-07	TRUE	-0.194516	0.873866	7.95627	0.0192898	0.320871	245.236	264.369	219.388	263.566	292.827	277.757
ENSMUSG00000017969	Ptgis	TRUE	0.343406	1.26875	3.68854	0.019315	0.321001	12.416	14.7997	15.2306	10.2653	11.3939	11.7861
ENSMUSG00000030122	Ptms	TRUE	-0.226182	0.854894	8.33252	0.0193675	0.321584	352.025	268.979	299.979	346.149	367.574	363.625
ENSMUSG00000097411	B430218F22Rik	TRUE	-1.35608	0.390643	-2.61119	0.0194397	0.322494	0.115677	0.0215425	0.0532538	0.125697	0.221671	0.161947
ENSMUSG00000020053	Igf1	TRUE	-0.483343	0.715318	5.02155	0.0195618	0.323433	22.0172	34.5756	17.982	44.9158	27.2877	31.9935
ENSMUSG00000027966	Col11a1	TRUE	-0.193122	0.874711	6.60023	0.0195563	0.323433	95.0674	89.5951	95.6438	120.774	100.195	99.5435
ENSMUSG00000049421	Zfp260	TRUE	-0.156546	0.89717	7.00649	0.0195377	0.323433	117.316	126.282	117.212	130.096	136.372	135.64
ENSMUSG00000039236	Isg20	TRUE	0.800708	1.74196	-0.110724	0.0195664	0.323433	1.46524	0.646274	0.745553	0.523738	0.421174	0.683776
ENSMUSG00000003573	Homer3	TRUE	0.185122	1.13691	6.00584	0.0195862	0.32347	66.4565	62.4947	73.3127	57.0455	58.4767	62.4036
ENSMUSG00000095747	Gm22475	FALSE	-1.26379	0.41645	-2.80909	0.0197492	0.324089	0.0963976	0.0430849	0.0887563	0.230445	0.177337	0.161947
ENSMUSG00000035000	Dpp4	TRUE	-0.999486	0.500178	0.556954	0.0197264	0.324089	1.5038	1.29255	0.319523	2.97483	1.9507	1.29558
ENSMUSG00000028487	Bnc2	TRUE	-0.515089	0.69975	2.6581	0.0197402	0.324089	5.72602	5.90263	3.47925	8.44265	6.40628	6.71181
ENSMUSG00000042408	Zmym6	TRUE	-0.21372	0.862311	5.28203	0.0197992	0.324089	36.8432	37.4193	33.3901	41.4172	42.6273	40.7747
ENSMUSG00000060657	Marf1	TRUE	-0.158084	0.896215	7.15863	0.0197236	0.324089	130.137	135.739	131.501	146.123	154.66	142.639
ENSMUSG00000026260	Ndufa10	TRUE	0.166803	1.12257	6.55571	0.0196889	0.324089	98.1135	100.022	108.176	92.0312	88.9565	91.896
ENSMUSG00000025159	Mms19	TRUE	0.181114	1.13376	6.30392	0.0197906	0.324089	78.2942	83.8648	87.0699	73.3233	76.8311	69.7272
ENSMUSG00000061207	Stk19	TRUE	0.250228	1.18939	4.44735	0.0196922	0.324089	21.6702	22.8565	23.1654	18.1842	19.9725	18.7679
ENSMUSG00000069020	Urm1	TRUE	0.250313	1.18946	4.76594	0.0197379	0.324089	26.3358	27.639	30.6564	23.652	23.1203	24.382
ENSMUSG00000024851	Pitpnm1	TRUE	0.324445	1.25218	4.15508	0.0197938	0.324089	19.3181	18.6989	19.9169	12.025	16.6253	17.5982
ENSMUSG00000027411	Vps16	TRUE	0.167798	1.12334	6.48369	0.0199027	0.325495	89.0329	94.7222	97.2592	83.1277	83.9467	83.0968
ENSMUSG00000022718	Dgcr8	TRUE	0.161569	1.1185	6.60377	0.0199281	0.325622	99.9836	101.594	107.502	87.548	95.0746	93.7314
ENSMUSG00000079638	Rhox2b	TRUE	-2.15371	0.224734	-3.10833	0.0200164	0.325675	0	0.0215425	0.0355025	0.188546	0.0221671	0.0719765
ENSMUSG00000058174	Gm5148	TRUE	-0.780018	0.582359	0.129512	0.0199667	0.325675	0.578386	0.538561	1.26034	1.82261	1.13052	1.16962
ENSMUSG00000030655	Smg1	TRUE	-0.176557	0.884812	8.06784	0.0200539	0.325675	262.452	235.825	252.973	277.728	284.891	286.466
ENSMUSG00000030741	Spns1	TRUE	0.202443	1.15064	5.74812	0.0200356	0.325675	51.8812	53.8346	58.7034	48.2467	46.8169	47.8464
ENSMUSG00000000561	Wdr77	TRUE	0.235598	1.17739	7.23897	0.0200082	0.325675	132.508	165.597	181.613	125.257	138.566	143.611
ENSMUSG00000041346	Wrap53	TRUE	0.245635	1.18561	5.10507	0.0200174	0.325675	33.9898	36.7945	41.9107	30.1464	31.8762	33.0372
ENSMUSG00000036523	Greb1	TRUE	0.941626	1.92069	5.32682	0.0200549	0.325675	23.9645	29.19	103.88	21.2009	22.1006	38.4534
ENSMUSG00000024331	Dsc2	TRUE	0.567212	1.48166	1.53866	0.0201251	0.326529	3.00761	3.81302	4.38456	2.074	2.17237	3.29292
ENSMUSG00000033882	Rbm46	TRUE	-0.551107	0.682496	1.26056	0.0201987	0.327435	2.19787	2.36967	1.40235	3.18433	2.85955	2.68112
ENSMUSG00000031137	Fgf13	TRUE	-0.250519	0.840594	4.8022	0.0202975	0.327981	30.693	25.9371	26.7334	33.7078	33.2063	32.2814
ENSMUSG00000020258	Glyctk	TRUE	0.358483	1.28208	3.52037	0.0203032	0.327981	12.8787	12.7962	14.556	8.88259	11.9702	10.5446
ENSMUSG00000082284	H3f3a-ps1	FALSE	0.592896	1.50827	2.27679	0.0203034	0.327981	2.6413	6.35503	5.6449	3.43572	3.05906	3.20295
ENSMUSG00000079259	Trim71	TRUE	0.635029	1.55297	5.01251	0.0202756	0.327981	23.9066	28.2422	59.4135	19.2107	22.7212	29.9062
ENSMUSG00000024909	Efemp2	TRUE	-0.276142	0.825797	4.53244	0.0203478	0.328411	21.4967	21.0901	19.5796	28.5751	21.7016	24.9758
ENSMUSG00000090334	Gm17149	FALSE	-0.940506	0.52105	-1.46245	0.0204218	0.328889	0.212075	0.17234	0.195264	0.377091	0.487676	0.269912
ENSMUSG00000078193	Gm2000	TRUE	-0.470558	0.721685	2.07911	0.0204045	0.328889	4.56925	3.44679	3.92303	6.57815	5.07626	4.91239
ENSMUSG00000025880	Smad7	TRUE	-0.349383	0.784919	3.36973	0.0204309	0.328889	8.25164	8.40156	9.51468	12.465	10.4629	10.4366
ENSMUSG00000073781	Gm6471	TRUE	-1.39805	0.379441	-2.28225	0.0204699	0.329015	0.0385591	0.0215425	0.177513	0.293293	0.133002	0.233924
ENSMUSG00000052676	Zmat1	TRUE	-0.408829	0.753234	3.25701	0.0204744	0.329015	9.38913	10.125	6.24844	12.7373	11.0835	10.3466
ENSMUSG00000059974	Ntm	TRUE	-0.473582	0.720174	2.72413	0.020526	0.329558	7.49974	4.93322	6.35495	10.2443	8.26832	7.61151
ENSMUSG00000038507	Parp12	TRUE	-0.576712	0.67049	1.49145	0.0205869	0.330249	2.62202	1.89574	2.0414	4.1061	2.79305	2.89705
ENSMUSG00000022414	Tab1	TRUE	0.198309	1.14735	5.53802	0.0206549	0.33074	51.5342	50.2155	46.5083	43.8473	42.3391	43.0059
ENSMUSG00000027628	Aar2	TRUE	0.213892	1.15981	5.59328	0.0206518	0.33074	45.1719	51.0341	53.4668	41.6686	42.8711	44.4995
ENSMUSG00000040749	Siah1b	TRUE	0.255835	1.19403	4.98801	0.0206713	0.33074	31.0979	33.6062	36.1416	25.8726	28.0857	30.482
[truncated: 17,310 more rows]

## Sheet: Magoh_vs_Emx1-Cre.txt
GeneID	GeneName	IsCoding	logFC(Magoh / Emx1-Cre)	fold	logCPM	PValue	FDR	Magoh_1	Magoh_2	Magoh_3	Emx1-Cre_1	Emx1-Cre_2	Emx1-Cre_3
[truncated: 18,464 more rows]

[truncated: 1 more sheets: MagohMos2_vs_Control]
