# Supplementary material for: Haploinsufficiency for Core Exon Junction Complex Components Disrupts Embryonic Neurogenesis and Causes p53-Mediated Microcephaly
Source: PLoS Genet. 2016 Sep 12;12(9):e1006282. doi: 10.1371/journal.pgen.1006282 (PMC5019403; doi:10.1371/journal.pgen.1006282)
Supplement: S4 Table — (XLSX) [file pgen.1006282.s011.xlsx]

## Sheet: Magoh KEGG DAVID
Category	Term	Count	%	PValue	Genes	List Total	Pop Hits	Pop Total	Fold Enrichment	Bonferroni	Benjamini	FDR
KEGG_PATHWAY	mmu03040:Spliceosome	16	3.00752	6.71459e-06	U2AF2, TRA2A, PRPF3, DDX5, RBMX, SRSF3, PRPF19, HNRNPA3, SRSF5, PPIH, SRSF7, SYF2, SNRPB, HNRNPC, HSPA8, PRPF38A	231	130	7708	4.10683	0.00152306	0.00152306	0.00859
KEGG_PATHWAY	mmu00190:Oxidative phosphorylation	14	2.63158	0.000246524	ATP5D, ATP5J2, NDUFB10, UQCRQ, ATP6V0B, ATP6V0C, ATP6V1A, NDUFS6, UQCR11, NDUFV1, ATP5C1, NDUFS3, ATP5H, NDUFS2	231	139	7708	3.3608	0.0544304	0.027596	0.314933
KEGG_PATHWAY	mmu03010:Ribosome	14	2.63158	0.000349276	RPL18, MRPS17, RPL13, MRPS11, RPS9, RPL28, MRPL24, RPS27, RPS28, RPL7, RPL13A, RPL31, RPL7A, UBA52	231	144	7708	3.24411	0.0762368	0.0260869	0.445928
KEGG_PATHWAY	mmu04915:Estrogen signaling pathway	9	1.69173	0.00872202	HSP90AB1, KCNJ5, ADCY3, GNAO1, HSP90AA1, FKBP4, CALM2, HSPA8, AKT2	231	98	7708	3.0644	0.863111	0.391736	10.6023
KEGG_PATHWAY	mmu05202:Transcriptional misregulation in cancer	12	2.25564	0.0107178	DOT1L, FUS, TRP53, CDKN1B, TAF15, UTY, ELK4, PML, H3F3A, H3F3B, DDX5, DDIT3	231	166	7708	2.41214	0.913366	0.386891	12.8778
KEGG_PATHWAY	mmu04110:Cell cycle	10	1.8797	0.0122369	CCNB1, CDC7, TRP53, ANAPC2, CDKN1B, ANAPC5, CDC14B, SKP2, CDK4, ORC3	231	125	7708	2.66944	0.93888	0.37238	14.574
KEGG_PATHWAY	mmu05016:Huntington's disease	13	2.44361	0.0147097	TRP53, ATP5D, NDUFB10, POLR2I, UQCRQ, NDUFS6, UQCR11, NDUFV1, ATP5C1, NDUFS3, ATP5H, NDUFS2, AP2M1	231	197	7708	2.20195	0.9654	0.381561	17.2699
KEGG_PATHWAY	mmu04914:Progesterone-mediated oocyte maturation	8	1.50376	0.0157612	HSP90AB1, CCNB1, ADCY3, ANAPC2, HSP90AA1, ANAPC5, CPEB2, AKT2	231	88	7708	3.03345	0.972848	0.362873	18.3924
KEGG_PATHWAY	mmu05168:Herpes simplex infection	13	2.44361	0.0209167	TRP53, H2-K1, CSNK2B, SKP2, PML, PPP1CC, SRSF3, SRSF5, SRSF7, GTF2I, MED8, IRF3, EEF1D	231	207	7708	2.09557	0.991757	0.413253	23.6954
KEGG_PATHWAY	mmu04120:Ubiquitin mediated proteolysis	10	1.8797	0.0259621	PRPF19, ANAPC2, ANAPC5, UBE4A, UBA3, PPIL2, PML, SKP2, UBE2I, UBOX5	231	142	7708	2.34986	0.997449	0.449609	28.5759
KEGG_PATHWAY	mmu05169:Epstein-Barr virus infection	13	2.44361	0.0261065	H2-K1, TRP53, IRAK1, CDKN1B, PSMD11, POLR2I, SKP2, CSNK2B, PSMD4, IRF3, POLR1C, HSPA8, AKT2	231	214	7708	2.02703	0.997533	0.42068	28.7113
KEGG_PATHWAY	mmu05012:Parkinson's disease	10	1.8797	0.0339625	ATP5D, NDUFS6, NDUFB10, UQCR11, NDUFV1, ATP5C1, NDUFS3, ATP5H, NDUFS2, UQCRQ	231	149	7708	2.23946	0.999608	0.479841	35.7283
KEGG_PATHWAY	mmu05010:Alzheimer's disease	11	2.06767	0.0388535	ATP5D, NDUFS6, NDUFB10, UQCR11, NDUFV1, ATP5C1, NDUFS3, ATP5H, NDUFS2, UQCRQ, CALM2	231	177	7708	2.07372	0.999876	0.499412	39.7693
KEGG_PATHWAY	mmu04932:Non-alcoholic fatty liver disease (NAFLD)	10	1.8797	0.0406277	NDUFS6, NDUFB10, UQCR11, NDUFV1, PRKAB1, NDUFS3, NDUFS2, UQCRQ, DDIT3, AKT2	231	154	7708	2.16675	0.999919	0.489572	41.1764
KEGG_PATHWAY	mmu05215:Prostate cancer	7	1.31579	0.0430225	HSP90AB1, FGFR2, TRP53, HSP90AA1, CDKN1B, CTNNB1, AKT2	231	86	7708	2.716	0.999954	0.485981	43.0275
KEGG_PATHWAY	mmu03050:Proteasome	5	0.93985	0.0443305	PSMB5, PSME1, PSMD11, PSMA4, PSMD4	231	45	7708	3.70755	0.999966	0.474447	44.0157
KEGG_PATHWAY	mmu04921:Oxytocin signaling pathway	10	1.8797	0.0465606	KCNJ5, ADCY3, MYL6, GNAO1, PPP1R12C, PRKAB1, PPP1CC, PLA2G4B, CALM2, CAMK1D	231	158	7708	2.1119	0.99998	0.470943	45.6643
KEGG_PATHWAY	mmu04114:Oocyte meiosis	8	1.50376	0.0477896	ADCY3, PPP2R1A, ANAPC2, ANAPC5, SLK, CPEB2, PPP1CC, CALM2	231	111	7708	2.4049	0.999985	0.46074	46.5536
KEGG_PATHWAY	mmu04919:Thyroid hormone signaling pathway	8	1.50376	0.0517423	TRP53, ITGAV, PFKFB2, MED24, MED13L, CTNNB1, AKT2, MED1	231	113	7708	2.36233	0.999994	0.469933	49.3235
KEGG_PATHWAY	mmu03015:mRNA surveillance pathway	7	1.31579	0.0640461	PPP2R1A, PAPOLA, SMG7, SRRM1, RNPS1, PABPC1, PPP1CC	231	95	7708	2.45869	1	0.528222	57.1212
KEGG_PATHWAY	mmu05213:Endometrial cancer	5	0.93985	0.0687296	TRP53, ILK, CTNNB1, AKT2, AXIN1	231	52	7708	3.20846	1	0.536847	59.7867
KEGG_PATHWAY	mmu04722:Neurotrophin signaling pathway	8	1.50376	0.0720315	MAGED1, TRP53, IRAK1, SH2B3, NGFRAP1, CRK, CALM2, AKT2	231	122	7708	2.18806	1	0.537617	61.5731
KEGG_PATHWAY	mmu05205:Proteoglycans in cancer	11	2.06767	0.0779467	TRP53, ARHGEF1, ITGAV, VEGFA, PPP1R12C, IGF2, DDX5, PPP1CC, FLNA, CTNNB1, AKT2	231	201	7708	1.82611	1	0.551092	64.5917
KEGG_PATHWAY	mmu05200:Pathways in cancer	18	3.38346	0.0846242	FGFR2, TRP53, HSP90AB1, ADCY3, ARHGEF1, HSP90AA1, FGFR3, SKP2, PML, BIRC5, CDK4, CTNNB1, CDKN1B, ITGAV, VEGFA, CRK, AXIN1, AKT2	231	397	7708	1.51291	1	0.566694	67.7358
KEGG_PATHWAY	mmu04270:Vascular smooth muscle contraction	8	1.50376	0.0850894	ADCY3, MYL6, ARHGEF1, PPP1R12C, PLA2G6, PPP1CC, PLA2G4B, CALM2	231	127	7708	2.10192	1	0.554017	67.945
KEGG_PATHWAY	mmu04612:Antigen processing and presentation	6	1.12782	0.0976814	HSP90AB1, H2-K1, HSP90AA1, PSME1, NFYC, HSPA8	231	82	7708	2.44156	1	0.592378	73.153
KEGG_PATHWAY	mmu04150:mTOR signaling pathway	5	0.93985	0.0987263	STK11, VEGFA, STRADA, EIF4E2, AKT2	231	59	7708	2.82779	1	0.582687	73.5481
KEGG_PATHWAY	mmu04068:FoxO signaling pathway	8	1.50376	0.0994155	CCNB1, PRMT1, CDKN1B, STK11, PRKAB1, SKP2, CCNG2, AKT2	231	132	7708	2.0223	1	0.572119	73.8057

## Sheet: Rbm8a KEGG DAVID
Category	Term	Count	%	PValue	Genes	List Total	Pop Hits	Pop Total	Fold Enrichment	Bonferroni	Benjamini	FDR
KEGG_PATHWAY	mmu03040:Spliceosome	11	4.93274	1.5725e-06	SRSF3, PRPF19, PPIH, SRSF5, HNRNPK, U2AF2, TRA2A, ACIN1, DDX5, HNRNPA1, HSPA8	87	130	7708	7.49673	0.000232704	0.000232704	0.00187345
KEGG_PATHWAY	mmu05168:Herpes simplex infection	8	3.58744	0.00814334	SRSF3, H2-K1, SRSF5, HNRNPK, GTF2I, PER3, PPP1CC, SRPK1	87	207	7708	3.42407	0.701847	0.453966	9.28218
KEGG_PATHWAY	mmu05202:Transcriptional misregulation in cancer	7	3.13901	0.0103699	MEN1, DOT1L, TAF15, H3F3A, H3F3B, DDX5, EWSR1	87	166	7708	3.73605	0.786211	0.402054	11.679
KEGG_PATHWAY	mmu04110:Cell cycle	6	2.69058	0.012676	CDC7, MCM7, SMAD4, CDK4, CDC26, TFDP1	87	125	7708	4.25269	0.848633	0.376254	14.1
KEGG_PATHWAY	mmu05205:Proteoglycans in cancer	6	2.69058	0.0734736	HIF1A, ARHGEF1, IGF2, DDX5, PPP1CC, CTNNB1	87	201	7708	2.64471	0.999988	0.89553	59.7147
KEGG_PATHWAY	mmu03010:Ribosome	5	2.24215	0.0768128	RPL3, RPS9, RPL10A, RPL7A, RPS2	87	144	7708	3.07631	0.999993	0.860744	61.4109
KEGG_PATHWAY	mmu04390:Hippo signaling pathway	5	2.24215	0.086258	NF2, SMAD4, PPP1CC, CTNNB1, AXIN1	87	150	7708	2.95326	0.999998	0.85151	65.8607

## Sheet: Eif4a3 KEGG DAVID
Category	Term	Count	%	PValue	Genes	List Total	Pop Hits	Pop Total	Fold Enrichment	Bonferroni	Benjamini	FDR
KEGG_PATHWAY	mmu03040:Spliceosome	19	3.6965	8.4528e-09	U2AF2, TRA2A, DDX5, U2AF1L4, HNRNPA1, SRSF3, HNRNPA3, SF3B1, SRSF5, PPIH, AQR, SRSF7, SRSF6, SNRPB, SYF2, SNRNP70, HNRNPC, HSPA8, PRPF38A	207	130	7708	5.44229	1.68211e-06	1.68211e-06	1.0586e-05
KEGG_PATHWAY	mmu03010:Ribosome	14	2.72374	0.000117424	RPL18, RPL13, MRPS10, RPS9, MRPL24, RPS28, RPS19, MRPL15, RPL7, RPL13A, RPL31, RPL3, RPL7A, UBA52	207	144	7708	3.62024	0.0230978	0.0116164	0.146958
KEGG_PATHWAY	mmu03015:mRNA surveillance pathway	9	1.75097	0.00377135	PPP2R1A, FIP1L1, PAPOLA, PABPC4, SRRM1, RNPS1, PABPC1, PPP1CC, CPSF1	207	95	7708	3.52769	0.528538	0.221697	4.62182
KEGG_PATHWAY	mmu05202:Transcriptional misregulation in cancer	12	2.33463	0.00481715	DOT1L, FUS, FUT8, TAF15, PML, H3F3A, WHSC1, H3F3B, BCL2L1, HMGA2, DDX5, ZBTB17	207	166	7708	2.69181	0.617463	0.213555	5.8682
KEGG_PATHWAY	mmu00190:Oxidative phosphorylation	10	1.94553	0.0119936	ATP6V0C, NDUFS6, ATP5J2, NDUFB6, NDUFB10, NDUFS3, ATP5H, NDUFS2, ATP6V0A2, ATP6V0B	207	139	7708	2.6789	0.909386	0.381359	14.0248
KEGG_PATHWAY	mmu03013:RNA transport	11	2.14008	0.0149901	SUMO3, SENP2, EEF1A1, EIF4A2, EIF4A1, PABPC4, SRRM1, RNPS1, UBE2I, PABPC1, EIF4E2	207	169	7708	2.42369	0.950492	0.394037	17.234
KEGG_PATHWAY	mmu05168:Herpes simplex infection	11	2.14008	0.0505851	SRSF3, H2-K1, SRSF5, SRSF7, SRSF6, MED8, PML, HCFC1, EEF1D, PPP1CC, SRPK1	207	207	7708	1.97876	0.999967	0.771384	47.8005
KEGG_PATHWAY	mmu03008:Ribosome biogenesis in eukaryotes	6	1.16732	0.0679052	DKC1, EMG1, RRP7A, TCOF1, REXO1, NOP56	207	82	7708	2.72464	0.999999	0.826092	58.5497
KEGG_PATHWAY	mmu04141:Protein processing in endoplasmic reticulum	9	1.75097	0.0764756	HSP90AB1, RRBP1, NSFL1C, UBE2J2, UGGT2, SSR4, CANX, HSPA8, SEC61G	207	166	7708	2.01886	1	0.827803	63.0779

## Sheet: Magoh Splicing DAVID  GO
Category	Term	Count	%	P-Value	Fold Enrichment
GOTERM_CC_FAT	non-membrane-bounded organelle	103	1.8	1.5e-12	2
GOTERM_CC_FAT	intracellular non-membrane-bounded organelle	103	1.8	1.5e-12	2
GOTERM_MF_FAT	nucleotide binding	111	2	2.1e-10	1.8
GOTERM_MF_FAT	RNA binding	50	0.9	9.3e-10	2.6
GOTERM_BP_FAT	translation	32	0.6	4.1e-09	3.4
GOTERM_BP_FAT	cell cycle	46	0.8	9.2e-09	2.6
GOTERM_CC_FAT	nuclear lumen	53	0.9	5.9e-08	2.2
GOTERM_CC_FAT	ribonucleoprotein complex	35	0.6	9.5e-08	2.8
GOTERM_CC_FAT	intracellular organelle lumen	61	1.1	2.2e-07	2
GOTERM_CC_FAT	organelle lumen	61	1.1	2.4e-07	2
GOTERM_CC_FAT	chromosome	30	0.5	3.7e-07	2.9
GOTERM_CC_FAT	membrane-enclosed lumen	61	1.1	7.3e-07	1.9
GOTERM_CC_FAT	organelle inner membrane	26	0.5	1.1e-06	3.1
GOTERM_CC_FAT	mitochondrial inner membrane	25	0.4	1.5e-06	3.1
GOTERM_BP_FAT	cell cycle process	31	0.5	1.5e-06	2.7
GOTERM_BP_FAT	RNA splicing	21	0.4	1.7e-06	3.6
GOTERM_BP_FAT	mRNA metabolic process	26	0.5	2.7e-06	2.9
GOTERM_CC_FAT	organelle envelope	35	0.6	3.4e-06	2.4
GOTERM_CC_FAT	envelope	35	0.6	3.7e-06	2.4
GOTERM_MF_FAT	ATPase activity	24	0.4	5.1e-06	3
GOTERM_CC_FAT	chromosomal part	25	0.4	5.1e-06	2.9
GOTERM_MF_FAT	ATPase activity, coupled	21	0.4	5.4e-06	3.3
GOTERM_CC_FAT	mitochondrial membrane	27	0.5	6.8e-06	2.7
GOTERM_CC_FAT	mitochondrial envelope	28	0.5	7e-06	2.7
GOTERM_BP_FAT	cell division	24	0.4	8.3e-06	2.9
GOTERM_BP_FAT	mitotic cell cycle	22	0.4	9.5e-06	3.1
GOTERM_MF_FAT	ATP binding	69	1.2	1.5e-05	1.7
GOTERM_MF_FAT	adenyl ribonucleotide binding	69	1.2	2.2e-05	1.7
GOTERM_BP_FAT	posttranscriptional regulation of gene expression	16	0.3	2.7e-05	3.7
GOTERM_BP_FAT	mRNA processing	22	0.4	2.8e-05	2.9
GOTERM_MF_FAT	protein methyltransferase activity	9	0.2	3.3e-05	7
GOTERM_CC_FAT	chromatin	16	0.3	3.8e-05	3.6
GOTERM_BP_FAT	mitosis	18	0.3	4.1e-05	3.2
GOTERM_BP_FAT	nuclear division	18	0.3	4.1e-05	3.2
GOTERM_BP_FAT	M phase of mitotic cell cycle	18	0.3	5.4e-05	3.2
GOTERM_BP_FAT	chromosome organization	28	0.5	5.5e-05	2.4
GOTERM_MF_FAT	adenyl nucleotide binding	70	1.2	5.8e-05	1.6
GOTERM_BP_FAT	organelle fission	18	0.3	6.5e-05	3.1
GOTERM_MF_FAT	helicase activity	14	0.2	7.4e-05	3.8
GOTERM_MF_FAT	purine nucleoside binding	70	1.2	7.7e-05	1.6
GOTERM_CC_FAT	mitochondrial part	31	0.5	7.8e-05	2.2
GOTERM_BP_FAT	DNA repair	19	0.3	9e-05	2.9
GOTERM_MF_FAT	nucleoside binding	70	1.2	9.2e-05	1.6
GOTERM_BP_FAT	cell cycle phase	24	0.4	9.5e-05	2.5
GOTERM_MF_FAT	translation factor activity, nucleic acid binding	12	0.2	9.9e-05	4.3
GOTERM_MF_FAT	ribonucleotide binding	78	1.4	0.0001	1.5
GOTERM_MF_FAT	purine ribonucleotide binding	78	1.4	0.0001	1.5
GOTERM_CC_FAT	spliceosome	13	0.2	0.00013	3.9
GOTERM_MF_FAT	purine NTP-dependent helicase activity	11	0.2	0.00015	4.5
GOTERM_MF_FAT	ATP-dependent helicase activity	11	0.2	0.00015	4.5
GOTERM_CC_FAT	spindle	12	0.2	0.00016	4.1
GOTERM_CC_FAT	nucleoplasm	33	0.6	0.00016	2
GOTERM_CC_FAT	ribosome	16	0.3	0.00021	3.1
GOTERM_MF_FAT	purine nucleotide binding	79	1.4	0.00022	1.5
GOTERM_MF_FAT	DNA binding	76	1.3	0.00022	1.5
GOTERM_BP_FAT	M phase	21	0.4	0.00024	2.5
GOTERM_BP_FAT	response to DNA damage stimulus	21	0.4	0.00029	2.5
GOTERM_BP_FAT	cellular response to stress	26	0.5	0.00034	2.2
GOTERM_MF_FAT	histone methyltransferase activity	7	0.1	0.00034	7.3
GOTERM_MF_FAT	structural constituent of ribosome	14	0.2	0.00036	3.3
GOTERM_CC_FAT	mitochondrion	57	1	0.00037	1.6
GOTERM_CC_FAT	heterochromatin	8	0.1	0.0004	5.8
GOTERM_CC_FAT	cytosol	30	0.5	0.0004	2
GOTERM_MF_FAT	ubiquitin-ubiquitin ligase activity	4	0.1	0.00042	23.5
GOTERM_BP_FAT	RNA processing	27	0.5	0.00046	2.1
GOTERM_MF_FAT	chromatin binding	14	0.2	0.00046	3.2
GOTERM_MF_FAT	transcription factor binding	20	0.4	0.00056	2.4
GOTERM_CC_FAT	nuclear chromatin	8	0.1	0.00064	5.4
GOTERM_BP_FAT	generation of precursor metabolites and energy	19	0.3	0.00065	2.5
GOTERM_CC_FAT	nucleoplasm part	28	0.5	0.00067	2
GOTERM_CC_FAT	nucleolus	20	0.4	0.00072	2.4
GOTERM_CC_FAT	proton-transporting two-sector ATPase complex	7	0.1	0.00083	6.2
GOTERM_BP_FAT	protein modification by small protein conjugation or removal	11	0.2	0.0009	3.6
GOTERM_BP_FAT	chromatin organization	21	0.4	0.00095	2.3
GOTERM_BP_FAT	ribonucleotide metabolic process	12	0.2	0.0011	3.3
GOTERM_BP_FAT	purine ribonucleotide biosynthetic process	11	0.2	0.0011	3.5
GOTERM_BP_FAT	protein polyubiquitination	5	0.1	0.0013	10.1
GOTERM_MF_FAT	N-methyltransferase activity	7	0.1	0.0014	5.6
GOTERM_CC_FAT	proton-transporting ATP synthase complex	5	0.1	0.0014	9.8
GOTERM_BP_FAT	ribonucleotide biosynthetic process	11	0.2	0.0015	3.4
GOTERM_BP_FAT	chromatin modification	17	0.3	0.0015	2.5
GOTERM_MF_FAT	identical protein binding	19	0.3	0.0015	2.3
GOTERM_MF_FAT	transcription cofactor activity	14	0.2	0.0018	2.7
GOTERM_BP_FAT	protein modification by small protein conjugation	9	0.2	0.0021	3.9
GOTERM_MF_FAT	transcription coactivator activity	10	0.2	0.0021	3.5
GOTERM_MF_FAT	hydrogen ion transmembrane transporter activity	9	0.2	0.0022	3.9
GOTERM_BP_FAT	purine nucleotide biosynthetic process	12	0.2	0.0022	3
GOTERM_BP_FAT	nucleobase, nucleoside, nucleotide and nucleic acid biosynthetic process	14	0.2	0.0023	2.7
GOTERM_BP_FAT	nucleobase, nucleoside and nucleotide biosynthetic process	14	0.2	0.0023	2.7
GOTERM_CC_FAT	nuclear heterochromatin	6	0.1	0.0023	6.4
GOTERM_BP_FAT	regulation of epithelial cell proliferation	8	0.1	0.0023	4.3
GOTERM_BP_FAT	purine ribonucleotide metabolic process	11	0.2	0.0025	3.2
GOTERM_BP_FAT	regulation of transcription	87	1.5	0.0029	1.3
GOTERM_BP_FAT	DNA metabolic process	24	0.4	0.003	2
GOTERM_BP_FAT	protein ubiquitination	8	0.1	0.003	4.1
GOTERM_MF_FAT	monovalent inorganic cation transmembrane transporter activity	9	0.2	0.0032	3.6
GOTERM_BP_FAT	response to UV	6	0.1	0.0032	5.9
GOTERM_BP_FAT	protein catabolic process	29	0.5	0.0035	1.8
GOTERM_CC_FAT	organelle membrane	36	0.6	0.0035	1.7
GOTERM_BP_FAT	response to protein stimulus	9	0.2	0.0038	3.5
GOTERM_BP_FAT	proton transport	7	0.1	0.0039	4.6
GOTERM_BP_FAT	modification-dependent macromolecule catabolic process	27	0.5	0.0039	1.8
GOTERM_BP_FAT	modification-dependent protein catabolic process	27	0.5	0.0039	1.8
GOTERM_BP_FAT	protein folding	11	0.2	0.004	3
GOTERM_BP_FAT	ATP synthesis coupled proton transport	6	0.1	0.0041	5.6
GOTERM_BP_FAT	energy coupled proton transport, down electrochemical gradient	6	0.1	0.0041	5.6
GOTERM_BP_FAT	hydrogen transport	7	0.1	0.0043	4.5
GOTERM_BP_FAT	transcription	71	1.3	0.0045	1.4
GOTERM_BP_FAT	nucleotide biosynthetic process	13	0.2	0.005	2.6
GOTERM_BP_FAT	macromolecule catabolic process	32	0.6	0.0053	1.7
GOTERM_CC_FAT	ubiquitin ligase complex	7	0.1	0.0053	4.3
GOTERM_BP_FAT	oxidative phosphorylation	7	0.1	0.0056	4.3
GOTERM_MF_FAT	tubulin binding	8	0.1	0.0056	3.7
GOTERM_BP_FAT	purine ribonucleoside triphosphate biosynthetic process	9	0.2	0.0057	3.3
GOTERM_BP_FAT	ribonucleoside triphosphate biosynthetic process	9	0.2	0.0057	3.3
GOTERM_BP_FAT	purine nucleoside triphosphate biosynthetic process	9	0.2	0.0061	3.3
GOTERM_CC_FAT	Srb-mediator complex	5	0.1	0.0063	6.6
GOTERM_BP_FAT	mammary gland duct morphogenesis	5	0.1	0.0064	6.6
GOTERM_BP_FAT	phosphorylation	34	0.6	0.0065	1.6
GOTERM_BP_FAT	nucleoside triphosphate biosynthetic process	9	0.2	0.0065	3.2
GOTERM_CC_FAT	nuclear chromosome part	9	0.2	0.0065	3.2
GOTERM_BP_FAT	ion transmembrane transport	6	0.1	0.0072	4.9
GOTERM_BP_FAT	purine nucleotide metabolic process	12	0.2	0.0072	2.6
GOTERM_BP_FAT	proteolysis involved in cellular protein catabolic process	27	0.5	0.0074	1.7
GOTERM_CC_FAT	respiratory chain	7	0.1	0.0079	4
GOTERM_BP_FAT	protein amino acid alkylation	6	0.1	0.0079	4.8
GOTERM_BP_FAT	protein amino acid methylation	6	0.1	0.0079	4.8
GOTERM_BP_FAT	cellular protein catabolic process	27	0.5	0.0079	1.7
GOTERM_MF_FAT	translation initiation factor activity	7	0.1	0.008	4
GOTERM_BP_FAT	regulation of translation	9	0.2	0.0088	3.1
GOTERM_BP_FAT	purine ribonucleoside triphosphate metabolic process	9	0.2	0.0093	3
GOTERM_BP_FAT	transcription, DNA-dependent	10	0.2	0.0094	2.8
GOTERM_BP_FAT	ribonucleoside triphosphate metabolic process	9	0.2	0.0098	3
GOTERM_BP_FAT	ATP biosynthetic process	8	0.1	0.0099	3.3
GOTERM_MF_FAT	translation elongation factor activity	5	0.1	0.011	5.7
GOTERM_MF_FAT	protein phosphatase binding	4	0.1	0.011	8.3
GOTERM_BP_FAT	RNA biosynthetic process	10	0.2	0.011	2.7
GOTERM_CC_FAT	pronucleus	4	0.1	0.012	8.2
GOTERM_BP_FAT	cellular macromolecule catabolic process	29	0.5	0.012	1.6
GOTERM_BP_FAT	purine nucleoside triphosphate metabolic process	9	0.2	0.012	2.9
GOTERM_CC_FAT	perinuclear region of cytoplasm	12	0.2	0.013	2.4
GOTERM_BP_FAT	mammary gland morphogenesis	5	0.1	0.015	5.2
GOTERM_BP_FAT	nitrogen compound biosynthetic process	17	0.3	0.016	1.9
GOTERM_BP_FAT	regulation of binding	8	0.1	0.016	3
GOTERM_BP_FAT	ATP metabolic process	8	0.1	0.016	3
GOTERM_CC_FAT	nuclear chromosome	9	0.2	0.016	2.8
GOTERM_BP_FAT	branching involved in mammary gland duct morphogenesis	4	0.1	0.017	7.2
GOTERM_CC_FAT	cytoskeleton	43	0.8	0.017	1.4
GOTERM_BP_FAT	cell cycle checkpoint	6	0.1	0.017	3.9
GOTERM_MF_FAT	phosphatase binding	4	0.1	0.018	7
GOTERM_BP_FAT	nucleoside triphosphate metabolic process	9	0.2	0.019	2.7
GOTERM_CC_FAT	microtubule cytoskeleton	21	0.4	0.019	1.7
GOTERM_CC_FAT	proteasome complex	6	0.1	0.019	3.8
GOTERM_BP_FAT	phosphate metabolic process	37	0.7	0.02	1.5
GOTERM_BP_FAT	phosphorus metabolic process	37	0.7	0.02	1.5
GOTERM_BP_FAT	response to unfolded protein	6	0.1	0.02	3.8
GOTERM_CC_FAT	proton-transporting two-sector ATPase complex, proton-transporting domain	4	0.1	0.02	6.7
GOTERM_BP_FAT	regulation of DNA binding	7	0.1	0.021	3.2
GOTERM_BP_FAT	ER overload response	3	0.1	0.021	12.8
GOTERM_CC_FAT	vacuole	12	0.2	0.022	2.2
GOTERM_BP_FAT	ubiquitin-dependent protein catabolic process	10	0.2	0.022	2.4
GOTERM_CC_FAT	mediator complex	3	0.1	0.023	12.4
GOTERM_BP_FAT	regulation of cell cycle	13	0.2	0.023	2.1
GOTERM_MF_FAT	RNA polymerase II transcription mediator activity	4	0.1	0.023	6.4
GOTERM_BP_FAT	cell cycle arrest	6	0.1	0.025	3.6
GOTERM_BP_FAT	negative regulation of transcription factor activity	4	0.1	0.025	6.2
GOTERM_BP_FAT	lysosome organization	4	0.1	0.025	6.2
GOTERM_CC_FAT	nuclear matrix	5	0.1	0.026	4.4
GOTERM_MF_FAT	NF-kappaB binding	4	0.1	0.026	6.1
GOTERM_BP_FAT	ribonucleoside metabolic process	5	0.1	0.026	4.4
GOTERM_CC_FAT	melanosome	7	0.1	0.027	3.1
GOTERM_CC_FAT	pigment granule	7	0.1	0.027	3.1
GOTERM_MF_FAT	inorganic cation transmembrane transporter activity	9	0.2	0.028	2.5
GOTERM_CC_FAT	lateral plasma membrane	3	0.1	0.028	11.1
GOTERM_BP_FAT	regulation of transcription factor activity	6	0.1	0.028	3.5
GOTERM_CC_FAT	centrosome	10	0.2	0.029	2.3
GOTERM_MF_FAT	microtubule binding	6	0.1	0.029	3.5
GOTERM_CC_FAT	microtubule	13	0.2	0.029	2
GOTERM_CC_FAT	chromosome, centromeric region	8	0.1	0.03	2.7
GOTERM_CC_FAT	cell leading edge	8	0.1	0.031	2.7
GOTERM_BP_FAT	purine ribonucleoside metabolic process	4	0.1	0.032	5.7
GOTERM_BP_FAT	mitotic cell cycle checkpoint	4	0.1	0.032	5.7
GOTERM_BP_FAT	purine nucleoside metabolic process	4	0.1	0.032	5.7
GOTERM_BP_FAT	regulation of epithelial cell proliferation involved in prostate gland development	3	0.1	0.033	10.3
GOTERM_BP_FAT	embryonic hemopoiesis	3	0.1	0.033	10.3
GOTERM_BP_FAT	G1/S transition checkpoint	3	0.1	0.033	10.3
GOTERM_BP_FAT	anatomical structure homeostasis	7	0.1	0.034	2.9
GOTERM_BP_FAT	nucleotide-excision repair	4	0.1	0.035	5.5
GOTERM_BP_FAT	regulation of protein stability	4	0.1	0.035	5.5
GOTERM_BP_FAT	histone methylation	4	0.1	0.035	5.5
GOTERM_BP_FAT	ER-nuclear signaling pathway	4	0.1	0.035	5.5
GOTERM_BP_FAT	regulation of cellular protein metabolic process	15	0.3	0.035	1.8
GOTERM_MF_FAT	histone-lysine N-methyltransferase activity	4	0.1	0.036	5.4
GOTERM_MF_FAT	lysine N-methyltransferase activity	4	0.1	0.036	5.4
GOTERM_MF_FAT	protein-lysine N-methyltransferase activity	4	0.1	0.036	5.4
GOTERM_BP_FAT	Wnt receptor signaling pathway	9	0.2	0.036	2.4
GOTERM_MF_FAT	hydrogen ion transporting ATP synthase activity, rotational mechanism	3	0.1	0.037	9.6
GOTERM_BP_FAT	chromosome segregation	6	0.1	0.038	3.2
GOTERM_BP_FAT	negative regulation of DNA binding	4	0.1	0.039	5.3
GOTERM_BP_FAT	response to endoplasmic reticulum stress	4	0.1	0.039	5.3
GOTERM_BP_FAT	mammary gland development	7	0.1	0.039	2.8
GOTERM_BP_FAT	protein targeting	9	0.2	0.041	2.3
GOTERM_CC_FAT	nuclear periphery	5	0.1	0.042	3.8
GOTERM_BP_FAT	negative regulation of epithelial cell proliferation	4	0.1	0.043	5.1
GOTERM_CC_FAT	cytoskeletal part	30	0.5	0.043	1.4
GOTERM_BP_FAT	amino acid activation	5	0.1	0.044	3.7
GOTERM_BP_FAT	tRNA aminoacylation	5	0.1	0.044	3.7
GOTERM_BP_FAT	tRNA aminoacylation for protein translation	5	0.1	0.044	3.7
GOTERM_CC_FAT	chromatin remodeling complex	5	0.1	0.045	3.7
GOTERM_MF_FAT	ATPase activity, coupled to transmembrane movement of ions	6	0.1	0.045	3.1
GOTERM_CC_FAT	proton-transporting ATP synthase complex, coupling factor F(o)	3	0.1	0.046	8.6
GOTERM_MF_FAT	ligase activity, forming carbon-oxygen bonds	5	0.1	0.046	3.7
GOTERM_MF_FAT	ligase activity, forming aminoacyl-tRNA and related compounds	5	0.1	0.046	3.7
GOTERM_MF_FAT	aminoacyl-tRNA ligase activity	5	0.1	0.046	3.7
GOTERM_MF_FAT	acid-amino acid ligase activity	10	0.2	0.046	2.1
GOTERM_BP_FAT	tRNA metabolic process	8	0.1	0.047	2.4
GOTERM_MF_FAT	cytoskeletal protein binding	19	0.3	0.047	1.6
GOTERM_MF_FAT	unfolded protein binding	6	0.1	0.048	3
GOTERM_MF_FAT	ligase activity, forming carbon-nitrogen bonds	11	0.2	0.048	2
GOTERM_BP_FAT	intracellular transport	20	0.4	0.049	1.6
GOTERM_CC_FAT	cell-cell adherens junction	4	0.1	0.05	4.8
GOTERM_MF_FAT	general RNA polymerase II transcription factor activity	4	0.1	0.052	4.7
GOTERM_BP_FAT	branching morphogenesis of a tube	7	0.1	0.054	2.6
GOTERM_BP_FAT	positive regulation of cellular biosynthetic process	24	0.4	0.054	1.5
GOTERM_BP_FAT	cellular protein localization	15	0.3	0.056	1.7
GOTERM_BP_FAT	membrane organization	14	0.2	0.056	1.8
GOTERM_MF_FAT	nitric-oxide synthase regulator activity	2	0	0.056	35.2
GOTERM_BP_FAT	DNA damage checkpoint	4	0.1	0.056	4.6
GOTERM_BP_FAT	negative regulation of binding	4	0.1	0.056	4.6
GOTERM_BP_FAT	biopolymer methylation	6	0.1	0.056	2.9
GOTERM_BP_FAT	tissue homeostasis	5	0.1	0.057	3.4
GOTERM_BP_FAT	positive regulation of nitrogen compound metabolic process	23	0.4	0.057	1.5
GOTERM_BP_FAT	regulation of oxygen and reactive oxygen species metabolic process	2	0	0.057	34.2
GOTERM_BP_FAT	cellular macromolecule localization	15	0.3	0.058	1.7
GOTERM_BP_FAT	positive regulation of biosynthetic process	24	0.4	0.059	1.5
GOTERM_MF_FAT	protein dimerization activity	16	0.3	0.06	1.7
GOTERM_BP_FAT	positive regulation of epithelial cell proliferation	4	0.1	0.061	4.4
GOTERM_MF_FAT	enzyme binding	12	0.2	0.061	1.8
GOTERM_BP_FAT	positive regulation of transcription	21	0.4	0.064	1.5
GOTERM_MF_FAT	small conjugating protein ligase activity	8	0.1	0.064	2.3
GOTERM_BP_FAT	transcription from RNA polymerase II promoter	6	0.1	0.065	2.8
GOTERM_MF_FAT	transcription activator activity	13	0.2	0.065	1.8
GOTERM_BP_FAT	intracellular receptor-mediated signaling pathway	4	0.1	0.065	4.3
GOTERM_MF_FAT	single-stranded DNA binding	4	0.1	0.066	4.3
GOTERM_MF_FAT	proton-transporting ATPase activity, rotational mechanism	3	0.1	0.066	7
GOTERM_BP_FAT	response to light stimulus	7	0.1	0.067	2.4
GOTERM_BP_FAT	morphogenesis of an epithelium	10	0.2	0.067	2
GOTERM_MF_FAT	protein kinase activity	24	0.4	0.068	1.5
GOTERM_BP_FAT	regulation of cellular response to stress	6	0.1	0.068	2.7
GOTERM_CC_FAT	microtubule organizing center	10	0.2	0.069	2
GOTERM_BP_FAT	spindle assembly	3	0.1	0.069	6.8
GOTERM_BP_FAT	mammary gland alveolus development	3	0.1	0.069	6.8
GOTERM_BP_FAT	neuroblast proliferation	3	0.1	0.069	6.8
GOTERM_MF_FAT	RNA polymerase II transcription factor activity	7	0.1	0.069	2.4
GOTERM_BP_FAT	macromolecular complex assembly	16	0.3	0.07	1.6
GOTERM_BP_FAT	DNA integrity checkpoint	4	0.1	0.07	4.1
GOTERM_MF_FAT	ribonucleoprotein binding	4	0.1	0.071	4.1
GOTERM_MF_FAT	nuclear hormone receptor binding	4	0.1	0.071	4.1
GOTERM_BP_FAT	macromolecular complex subunit organization	17	0.3	0.072	1.6
GOTERM_BP_FAT	blastocyst development	5	0.1	0.072	3.2
GOTERM_BP_FAT	morphogenesis of a branching structure	8	0.1	0.073	2.2
GOTERM_BP_FAT	sensory organ development	13	0.2	0.074	1.7
GOTERM_CC_FAT	spindle microtubule	3	0.1	0.075	6.5
GOTERM_CC_FAT	proton-transporting two-sector ATPase complex, catalytic domain	3	0.1	0.075	6.5
GOTERM_MF_FAT	peptidyl-prolyl cis-trans isomerase activity	4	0.1	0.076	4
GOTERM_BP_FAT	vacuole organization	4	0.1	0.076	4
GOTERM_BP_FAT	protein stabilization	3	0.1	0.078	6.4
GOTERM_CC_FAT	ESC/E(Z) complex	2	0	0.078	24.7
GOTERM_BP_FAT	positive regulation of gene expression	21	0.4	0.079	1.5
GOTERM_BP_FAT	nucleoside metabolic process	5	0.1	0.08	3.1
GOTERM_BP_FAT	methylation	6	0.1	0.08	2.6
GOTERM_BP_FAT	regulation of nucleocytoplasmic transport	4	0.1	0.081	3.9
GOTERM_MF_FAT	ribosome binding	3	0.1	0.082	6.2
GOTERM_MF_FAT	TPR domain binding	2	0	0.083	23.5
GOTERM_MF_FAT	Hsp90 protein binding	2	0	0.083	23.5
GOTERM_CC_FAT	proton-transporting V-type ATPase complex	3	0.1	0.083	6.2
GOTERM_BP_FAT	DNA damage response, signal transduction	5	0.1	0.084	3
GOTERM_MF_FAT	cis-trans isomerase activity	4	0.1	0.086	3.8
GOTERM_BP_FAT	nuclear import	5	0.1	0.088	3
GOTERM_CC_FAT	lamellipodium	5	0.1	0.089	2.9
GOTERM_MF_FAT	phosphoprotein binding	3	0.1	0.091	5.9
GOTERM_BP_FAT	regulation of transcription from RNA polymerase II promoter	25	0.4	0.091	1.4
GOTERM_BP_FAT	negative regulation of molecular function	8	0.1	0.091	2.1
GOTERM_BP_FAT	in utero embryonic development	13	0.2	0.092	1.7
GOTERM_MF_FAT	protein serine/threonine kinase activity	18	0.3	0.092	1.5
GOTERM_MF_FAT	DNA-dependent ATPase activity	4	0.1	0.092	3.7
GOTERM_CC_FAT	cytoplasmic membrane-bounded vesicle	17	0.3	0.093	1.5
GOTERM_BP_FAT	response to extracellular stimulus	8	0.1	0.094	2.1
GOTERM_CC_FAT	nuclear speck	6	0.1	0.095	2.5
GOTERM_BP_FAT	centrosome organization	3	0.1	0.095	5.7
GOTERM_MF_FAT	protein domain specific binding	10	0.2	0.095	1.8
GOTERM_BP_FAT	positive regulation of macromolecule biosynthetic process	22	0.4	0.096	1.4
GOTERM_BP_FAT	cytoskeleton organization	15	0.3	0.096	1.6
GOTERM_MF_FAT	hormone receptor binding	4	0.1	0.097	3.6
GOTERM_MF_FAT	protein homodimerization activity	10	0.2	0.098	1.8
GOTERM_BP_FAT	gland morphogenesis	6	0.1	0.098	2.4

## Sheet: Eif4a3 Splicing DAVID GO
Category	Term	Count	%	P-Value	Fold Enrichment
GOTERM_MF_FAT	RNA binding	69	1.3	2.6e-22	3.9
GOTERM_BP_FAT	mRNA metabolic process	40	0.7	8.1e-16	4.7
GOTERM_BP_FAT	mRNA processing	37	0.7	1.6e-15	5.1
GOTERM_BP_FAT	RNA processing	47	0.9	5.2e-15	3.9
GOTERM_BP_FAT	RNA splicing	32	0.6	6.4e-15	5.7
GOTERM_CC_FAT	ribonucleoprotein complex	45	0.8	2.1e-14	3.8
GOTERM_MF_FAT	nucleotide binding	111	2.1	2.8e-12	1.9
GOTERM_CC_FAT	spliceosome	19	0.4	2e-09	6
GOTERM_CC_FAT	nuclear lumen	54	1	2.6e-09	2.4
GOTERM_CC_FAT	organelle lumen	63	1.2	3.9e-09	2.2
GOTERM_CC_FAT	intracellular non-membrane-bounded organelle	89	1.6	6.3e-09	1.8
GOTERM_CC_FAT	non-membrane-bounded organelle	89	1.6	6.3e-09	1.8
GOTERM_CC_FAT	intracellular organelle lumen	62	1.1	8.9e-09	2.2
GOTERM_CC_FAT	membrane-enclosed lumen	63	1.2	1.4e-08	2.1
GOTERM_BP_FAT	translation	29	0.5	7.8e-08	3.3
GOTERM_CC_FAT	nucleolus	24	0.4	3.9e-06	3.1
GOTERM_CC_FAT	nucleoplasm	34	0.6	2.1e-05	2.2
GOTERM_MF_FAT	adenyl ribonucleotide binding	65	1.2	3.5e-05	1.7
GOTERM_MF_FAT	ATP binding	64	1.2	4.5e-05	1.7
GOTERM_CC_FAT	chromatin	15	0.3	7.6e-05	3.6
GOTERM_MF_FAT	adenyl nucleotide binding	66	1.2	8.5e-05	1.6
GOTERM_MF_FAT	purine ribonucleotide binding	74	1.4	0.00011	1.5
GOTERM_MF_FAT	ribonucleotide binding	74	1.4	0.00011	1.5
GOTERM_CC_FAT	ribosome	16	0.3	0.00011	3.3
GOTERM_BP_FAT	chromatin modification	19	0.4	0.00011	2.9
GOTERM_MF_FAT	purine nucleoside binding	66	1.2	0.00011	1.6
GOTERM_MF_FAT	nucleoside binding	66	1.2	0.00013	1.6
GOTERM_BP_FAT	chromosome organization	26	0.5	0.00017	2.3
GOTERM_MF_FAT	structural constituent of ribosome	14	0.3	0.00019	3.5
GOTERM_BP_FAT	chromatin organization	22	0.4	0.0002	2.5
GOTERM_CC_FAT	nuclear heterochromatin	7	0.1	0.00022	7.9
GOTERM_MF_FAT	purine nucleotide binding	75	1.4	0.00023	1.5
GOTERM_CC_FAT	chromosome	23	0.4	0.00024	2.4
GOTERM_CC_FAT	nuclear body	13	0.2	0.00025	3.6
GOTERM_MF_FAT	translation factor activity, nucleic acid binding	11	0.2	0.00027	4.2
GOTERM_CC_FAT	heterochromatin	8	0.1	0.00027	6.2
GOTERM_CC_FAT	nuclear speck	10	0.2	0.00044	4.4
GOTERM_BP_FAT	ribonucleoprotein complex biogenesis	13	0.2	0.00044	3.4
GOTERM_CC_FAT	nuclear chromatin	8	0.1	0.00044	5.7
GOTERM_BP_FAT	cell cycle	33	0.6	0.00045	1.9
GOTERM_CC_FAT	chromosomal part	20	0.4	0.00046	2.5
GOTERM_BP_FAT	nuclear mRNA splicing, via spliceosome	7	0.1	0.0005	6.8
GOTERM_BP_FAT	RNA splicing, via transesterification reactions with bulged adenosine as nucleophile	7	0.1	0.0005	6.8
GOTERM_BP_FAT	RNA splicing, via transesterification reactions	7	0.1	0.0005	6.8
GOTERM_BP_FAT	ribonucleotide metabolic process	12	0.2	0.00073	3.4
GOTERM_BP_FAT	purine ribonucleotide biosynthetic process	11	0.2	0.00079	3.7
GOTERM_MF_FAT	chromatin binding	13	0.2	0.00088	3.1
GOTERM_MF_FAT	N-methyltransferase activity	7	0.1	0.001	6
GOTERM_BP_FAT	ribonucleotide biosynthetic process	11	0.2	0.001	3.6
GOTERM_BP_FAT	purine ribonucleoside triphosphate biosynthetic process	10	0.2	0.0011	3.9
GOTERM_BP_FAT	ribonucleoside triphosphate biosynthetic process	10	0.2	0.0011	3.9
GOTERM_MF_FAT	DNA binding	69	1.3	0.0011	1.5
GOTERM_BP_FAT	purine nucleoside triphosphate biosynthetic process	10	0.2	0.0012	3.8
GOTERM_MF_FAT	translation elongation factor activity	6	0.1	0.0012	7.3
GOTERM_CC_FAT	organelle envelope	27	0.5	0.0012	2
GOTERM_BP_FAT	nucleoside triphosphate biosynthetic process	10	0.2	0.0013	3.8
GOTERM_CC_FAT	envelope	27	0.5	0.0013	2
GOTERM_BP_FAT	purine nucleotide biosynthetic process	12	0.2	0.0015	3.1
GOTERM_CC_FAT	cytosol	27	0.5	0.0016	1.9
GOTERM_BP_FAT	purine ribonucleotide metabolic process	11	0.2	0.0018	3.3
GOTERM_BP_FAT	purine ribonucleoside triphosphate metabolic process	10	0.2	0.002	3.5
GOTERM_CC_FAT	proton-transporting two-sector ATPase complex, proton-transporting domain	5	0.1	0.002	9
GOTERM_BP_FAT	ribonucleoside triphosphate metabolic process	10	0.2	0.0021	3.5
GOTERM_CC_FAT	organelle membrane	35	0.6	0.0024	1.7
GOTERM_MF_FAT	ATPase activity, coupled	15	0.3	0.0026	2.5
GOTERM_BP_FAT	purine nucleoside triphosphate metabolic process	10	0.2	0.0028	3.4
GOTERM_MF_FAT	mRNA binding	7	0.1	0.003	4.9
GOTERM_BP_FAT	cell cycle process	22	0.4	0.0033	2
GOTERM_MF_FAT	ATPase activity	17	0.3	0.0035	2.3
GOTERM_CC_FAT	mitochondrial part	25	0.5	0.0036	1.9
GOTERM_MF_FAT	structure-specific DNA binding	8	0.1	0.004	4
GOTERM_BP_FAT	ribosome biogenesis	10	0.2	0.004	3.2
GOTERM_BP_FAT	ribonucleoside metabolic process	6	0.1	0.0043	5.5
GOTERM_BP_FAT	ncRNA metabolic process	14	0.3	0.0043	2.5
GOTERM_BP_FAT	nucleobase, nucleoside and nucleotide biosynthetic process	13	0.2	0.0043	2.6
GOTERM_BP_FAT	nucleobase, nucleoside, nucleotide and nucleic acid biosynthetic process	13	0.2	0.0043	2.6
GOTERM_BP_FAT	nucleoside triphosphate metabolic process	10	0.2	0.0048	3.1
GOTERM_CC_FAT	mitochondrial envelope	20	0.4	0.0051	2
GOTERM_MF_FAT	transcription coactivator activity	9	0.2	0.0051	3.4
GOTERM_BP_FAT	purine nucleotide metabolic process	12	0.2	0.0051	2.7
GOTERM_BP_FAT	cell division	17	0.3	0.0054	2.2
GOTERM_CC_FAT	mitochondrial membrane	19	0.4	0.0058	2
GOTERM_CC_FAT	ribosomal subunit	7	0.1	0.0063	4.2
GOTERM_MF_FAT	protein methyltransferase activity	6	0.1	0.0066	5
GOTERM_BP_FAT	ATP biosynthetic process	8	0.1	0.0078	3.5
GOTERM_MF_FAT	transcription cofactor activity	12	0.2	0.0087	2.5
GOTERM_BP_FAT	synaptogenesis	4	0.1	0.0091	9
GOTERM_BP_FAT	nucleotide biosynthetic process	12	0.2	0.0095	2.5
GOTERM_MF_FAT	transcription factor binding	16	0.3	0.01	2.1
GOTERM_CC_FAT	nucleoplasm part	23	0.4	0.011	1.8
GOTERM_CC_FAT	nuclear chromosome	9	0.2	0.012	2.9
GOTERM_MF_FAT	nuclear hormone receptor binding	5	0.1	0.012	5.5
GOTERM_MF_FAT	histone methyltransferase activity	5	0.1	0.012	5.5
GOTERM_CC_FAT	chaperonin-containing T-complex	3	0.1	0.012	16.9
GOTERM_BP_FAT	ATP metabolic process	8	0.1	0.013	3.2
GOTERM_BP_FAT	cytoskeleton-dependent intracellular transport	5	0.1	0.013	5.4
GOTERM_BP_FAT	microtubule-based transport	4	0.1	0.013	8
GOTERM_CC_FAT	Golgi apparatus part	13	0.2	0.013	2.3
GOTERM_BP_FAT	biopolymer methylation	7	0.1	0.014	3.5
GOTERM_BP_FAT	vesicle transport along microtubule	3	0.1	0.015	15.4
GOTERM_BP_FAT	mRNA splice site selection	3	0.1	0.015	15.4
GOTERM_MF_FAT	RNA methyltransferase activity	4	0.1	0.015	7.5
GOTERM_CC_FAT	sex chromatin	4	0.1	0.015	7.5
GOTERM_CC_FAT	nuclear chromosome part	8	0.1	0.015	3.1
GOTERM_CC_FAT	sex chromosome	4	0.1	0.017	7.2
GOTERM_MF_FAT	protein serine/threonine kinase activity	20	0.4	0.018	1.8
GOTERM_MF_FAT	hormone receptor binding	5	0.1	0.019	4.8
GOTERM_BP_FAT	nucleoside metabolic process	6	0.1	0.019	3.8
GOTERM_MF_FAT	single-stranded RNA binding	4	0.1	0.02	6.8
GOTERM_CC_FAT	centrosome	10	0.2	0.02	2.5
GOTERM_CC_FAT	proton-transporting two-sector ATPase complex	5	0.1	0.021	4.7
GOTERM_CC_FAT	cytosolic part	6	0.1	0.021	3.8
GOTERM_MF_FAT	helicase activity	9	0.2	0.022	2.6
GOTERM_BP_FAT	nitrogen compound biosynthetic process	16	0.3	0.022	1.9
GOTERM_BP_FAT	organelle fission	12	0.2	0.022	2.2
GOTERM_BP_FAT	methylation	7	0.1	0.023	3.2
GOTERM_BP_FAT	transcription	64	1.2	0.023	1.3
GOTERM_BP_FAT	protein folding	9	0.2	0.025	2.5
GOTERM_CC_FAT	organelle inner membrane	15	0.3	0.027	1.9
GOTERM_MF_FAT	poly(A) RNA binding	3	0.1	0.028	11.3
GOTERM_BP_FAT	positive regulation of cell proliferation	15	0.3	0.028	1.9
GOTERM_BP_FAT	purine nucleoside metabolic process	4	0.1	0.028	6
GOTERM_BP_FAT	purine ribonucleoside metabolic process	4	0.1	0.028	6
GOTERM_BP_FAT	RNA modification	5	0.1	0.029	4.3
GOTERM_BP_FAT	metallo-sulfur cluster assembly	3	0.1	0.03	10.8
GOTERM_BP_FAT	iron-sulfur cluster assembly	3	0.1	0.03	10.8
GOTERM_MF_FAT	lysine N-methyltransferase activity	4	0.1	0.031	5.8
GOTERM_MF_FAT	histone-lysine N-methyltransferase activity	4	0.1	0.031	5.8
GOTERM_MF_FAT	protein-lysine N-methyltransferase activity	4	0.1	0.031	5.8
GOTERM_BP_FAT	generation of precursor metabolites and energy	14	0.3	0.031	1.9
GOTERM_BP_FAT	protein amino acid alkylation	5	0.1	0.031	4.2
GOTERM_BP_FAT	protein amino acid methylation	5	0.1	0.031	4.2
GOTERM_BP_FAT	ncRNA processing	10	0.2	0.033	2.3
GOTERM_MF_FAT	poly-purine tract binding	3	0.1	0.033	10.2
GOTERM_CC_FAT	mitochondrial membrane part	5	0.1	0.035	4
GOTERM_CC_FAT	pore complex	6	0.1	0.037	3.2
GOTERM_CC_FAT	mitochondrial inner membrane	14	0.3	0.038	1.9
GOTERM_MF_FAT	unfolded protein binding	6	0.1	0.038	3.2
GOTERM_CC_FAT	Golgi apparatus	26	0.5	0.04	1.5
GOTERM_BP_FAT	nuclear division	11	0.2	0.04	2.1
GOTERM_BP_FAT	mitosis	11	0.2	0.04	2.1
GOTERM_BP_FAT	mitotic cell cycle	13	0.2	0.04	1.9
GOTERM_BP_FAT	cellular macromolecular complex assembly	12	0.2	0.04	2
GOTERM_CC_FAT	proton-transporting ATP synthase complex, coupling factor F(o)	3	0.1	0.041	9.1
GOTERM_BP_FAT	phosphatidylcholine metabolic process	3	0.1	0.042	9
GOTERM_BP_FAT	M phase of mitotic cell cycle	11	0.2	0.045	2
GOTERM_BP_FAT	one-carbon metabolic process	8	0.1	0.045	2.5
GOTERM_BP_FAT	phosphorylation	29	0.5	0.045	1.4
GOTERM_BP_FAT	cell aging	4	0.1	0.046	4.9
GOTERM_BP_FAT	response to radiation	9	0.2	0.046	2.3
GOTERM_BP_FAT	synapse organization	5	0.1	0.047	3.7
GOTERM_BP_FAT	neuron maturation	3	0.1	0.049	8.3
GOTERM_CC_FAT	microtubule organizing center	10	0.2	0.051	2.1
GOTERM_CC_FAT	mitochondrion	44	0.8	0.051	1.3
GOTERM_CC_FAT	mitochondrial outer membrane	6	0.1	0.052	3
GOTERM_BP_FAT	reproductive cellular process	10	0.2	0.053	2.1
GOTERM_BP_FAT	M phase	14	0.3	0.053	1.8
GOTERM_BP_FAT	regulation of transcription	75	1.4	0.054	1.2
GOTERM_BP_FAT	regulation of oxygen and reactive oxygen species metabolic process	2	0	0.055	35.9
GOTERM_BP_FAT	negative regulation of retinoic acid receptor signaling pathway	2	0	0.055	35.9
GOTERM_BP_FAT	rRNA processing	6	0.1	0.055	2.9
GOTERM_BP_FAT	proton transport	5	0.1	0.056	3.4
GOTERM_MF_FAT	single-stranded DNA binding	4	0.1	0.056	4.5
GOTERM_BP_FAT	rRNA metabolic process	6	0.1	0.058	2.9
GOTERM_CC_FAT	spindle	7	0.1	0.058	2.5
GOTERM_CC_FAT	proteasome complex	5	0.1	0.059	3.4
GOTERM_BP_FAT	hydrogen transport	5	0.1	0.059	3.4
GOTERM_BP_FAT	phosphate metabolic process	33	0.6	0.061	1.4
GOTERM_BP_FAT	phosphorus metabolic process	33	0.6	0.061	1.4
GOTERM_MF_FAT	ribonucleoprotein binding	4	0.1	0.061	4.4
GOTERM_CC_FAT	cytoplasmic membrane-bounded vesicle	17	0.3	0.061	1.6
GOTERM_BP_FAT	protein catabolic process	23	0.4	0.062	1.5
GOTERM_BP_FAT	DNA packaging	7	0.1	0.063	2.5
GOTERM_BP_FAT	blastocyst development	5	0.1	0.063	3.3
GOTERM_BP_FAT	spliceosome assembly	3	0.1	0.064	7.2
GOTERM_BP_FAT	neuroblast proliferation	3	0.1	0.064	7.2
GOTERM_CC_FAT	melanosome	6	0.1	0.064	2.8
GOTERM_CC_FAT	pigment granule	6	0.1	0.064	2.8
GOTERM_MF_FAT	ATPase activity, coupled to transmembrane movement of ions, phosphorylative mechanism	5	0.1	0.064	3.3
GOTERM_CC_FAT	microtubule cytoskeleton	18	0.3	0.065	1.6
GOTERM_MF_FAT	double-stranded DNA binding	4	0.1	0.065	4.3
GOTERM_CC_FAT	membrane-bounded vesicle	17	0.3	0.068	1.6
GOTERM_BP_FAT	ribonucleoprotein complex assembly	4	0.1	0.068	4.2
GOTERM_CC_FAT	organelle outer membrane	6	0.1	0.069	2.7
GOTERM_BP_FAT	oxidative phosphorylation	5	0.1	0.07	3.2
GOTERM_MF_FAT	protein phosphatase binding	3	0.1	0.074	6.6
GOTERM_BP_FAT	cell cycle arrest	5	0.1	0.074	3.1
GOTERM_BP_FAT	regulation of cell proliferation	22	0.4	0.074	1.5
GOTERM_BP_FAT	cell cycle phase	15	0.3	0.075	1.6
GOTERM_CC_FAT	pronucleus	3	0.1	0.075	6.6
GOTERM_CC_FAT	cytosolic ribosome	3	0.1	0.075	6.6
GOTERM_CC_FAT	large ribosomal subunit	4	0.1	0.075	4
GOTERM_BP_FAT	regulation of cell cycle	11	0.2	0.076	1.8
GOTERM_CC_FAT	outer membrane	6	0.1	0.078	2.6
GOTERM_BP_FAT	membrane organization	13	0.2	0.078	1.7
GOTERM_MF_FAT	ATP-dependent helicase activity	6	0.1	0.079	2.6
GOTERM_MF_FAT	purine NTP-dependent helicase activity	6	0.1	0.079	2.6
GOTERM_BP_FAT	protein polyubiquitination	3	0.1	0.08	6.3
GOTERM_BP_FAT	cellular macromolecular complex subunit organization	12	0.2	0.081	1.8
GOTERM_BP_FAT	regulation of retinoic acid receptor signaling pathway	2	0	0.081	23.9
GOTERM_MF_FAT	phosphoprotein binding	3	0.1	0.081	6.3
GOTERM_CC_FAT	respiratory chain	5	0.1	0.082	3
GOTERM_CC_FAT	proton-transporting ATP synthase complex	3	0.1	0.082	6.2
GOTERM_MF_FAT	translation initiation factor activity	5	0.1	0.082	3
GOTERM_BP_FAT	ATP synthesis coupled proton transport	4	0.1	0.083	3.9
GOTERM_BP_FAT	energy coupled proton transport, down electrochemical gradient	4	0.1	0.083	3.9
GOTERM_MF_FAT	transcription activator activity	12	0.2	0.085	1.7
GOTERM_BP_FAT	ethanolamine and derivative metabolic process	3	0.1	0.088	6
GOTERM_BP_FAT	macromolecular complex assembly	15	0.3	0.09	1.6
GOTERM_BP_FAT	positive regulation of cellular biosynthetic process	22	0.4	0.092	1.4
GOTERM_BP_FAT	intracellular transport	18	0.3	0.095	1.5
GOTERM_BP_FAT	tRNA metabolic process	7	0.1	0.095	2.2
GOTERM_MF_FAT	protein kinase activity	22	0.4	0.097	1.4
GOTERM_CC_FAT	eukaryotic translation elongation factor 1 complex	2	0	0.097	19.7
GOTERM_CC_FAT	Barr body	2	0	0.097	19.7
GOTERM_MF_FAT	phosphatase binding	3	0.1	0.098	5.6
GOTERM_BP_FAT	positive regulation of biosynthetic process	22	0.4	0.098	1.4
GOTERM_MF_FAT	protein transporter activity	5	0.1	0.098	2.8

## Sheet: Rbm8a Splaicing DAVID Bayes=20
Category	Term	Count	%	P-Value	Fold Enrichment
GOTERM_BP_FAT	mRNA metabolic process	23	0.9	2.9e-11	6
GOTERM_BP_FAT	RNA splicing	19	0.8	7.1e-11	7.5
GOTERM_BP_FAT	mRNA processing	21	0.9	1.1e-10	6.3
GOTERM_BP_FAT	RNA processing	22	0.9	1.4e-07	4
GOTERM_BP_FAT	chromosome organization	16	0.7	0.00018	3.1
GOTERM_BP_FAT	chromatin organization	12	0.5	0.0021	3
GOTERM_BP_FAT	positive regulation of cell differentiation	8	0.3	0.0067	3.6
GOTERM_BP_FAT	translation	11	0.5	0.0072	2.7
GOTERM_BP_FAT	tissue morphogenesis	9	0.4	0.011	3
GOTERM_BP_FAT	positive regulation of osteoblast differentiation	3	0.1	0.013	16.9
GOTERM_BP_FAT	formation of primary germ layer	4	0.2	0.014	7.9
GOTERM_BP_FAT	gastrulation	5	0.2	0.014	5.3
GOTERM_BP_FAT	negative regulation of transcription, DNA-dependent	10	0.4	0.016	2.6
GOTERM_BP_FAT	negative regulation of RNA metabolic process	10	0.4	0.017	2.5
GOTERM_BP_FAT	positive regulation of developmental process	8	0.3	0.019	3
GOTERM_BP_FAT	negative regulation of transcription	11	0.5	0.019	2.3
GOTERM_BP_FAT	transcription	33	1.4	0.021	1.5
GOTERM_BP_FAT	Wnt receptor signaling pathway	6	0.2	0.024	3.6
GOTERM_BP_FAT	phosphate metabolic process	19	0.8	0.025	1.7
GOTERM_BP_FAT	phosphorus metabolic process	19	0.8	0.025	1.7
GOTERM_BP_FAT	regulation of myeloid cell differentiation	4	0.2	0.026	6.2
GOTERM_BP_FAT	regulation of transcription	39	1.6	0.028	1.4
GOTERM_BP_FAT	negative regulation of nucleobase, nucleoside, nucleotide and nucleic acid metabolic process	11	0.5	0.029	2.2
GOTERM_BP_FAT	chromatin modification	8	0.3	0.03	2.7
GOTERM_BP_FAT	negative regulation of nitrogen compound metabolic process	11	0.5	0.03	2.2
GOTERM_BP_FAT	chromosome condensation	3	0.1	0.031	10.8
GOTERM_BP_FAT	embryonic hindlimb morphogenesis	3	0.1	0.031	10.8
GOTERM_BP_FAT	protein amino acid phosphorylation	15	0.6	0.031	1.9
GOTERM_BP_FAT	negative regulation of gene expression	11	0.5	0.035	2.1
GOTERM_BP_FAT	S phase of mitotic cell cycle	2	0.1	0.037	52.7
GOTERM_BP_FAT	S phase	2	0.1	0.037	52.7
GOTERM_BP_FAT	phosphorylation	16	0.7	0.037	1.8
GOTERM_BP_FAT	regulation of translation	5	0.2	0.037	4
GOTERM_BP_FAT	embryonic morphogenesis	10	0.4	0.038	2.2
GOTERM_BP_FAT	DNA packaging	5	0.2	0.039	3.9
GOTERM_BP_FAT	negative regulation of macromolecule biosynthetic process	11	0.5	0.039	2.1
GOTERM_BP_FAT	positive regulation of myeloid cell differentiation	3	0.1	0.039	9.5
GOTERM_BP_FAT	posttranscriptional regulation of gene expression	6	0.2	0.039	3.2
GOTERM_BP_FAT	hemopoiesis	8	0.3	0.039	2.5
GOTERM_BP_FAT	chordate embryonic development	11	0.5	0.04	2.1
GOTERM_BP_FAT	regulation of osteoblast differentiation	3	0.1	0.042	9.1
GOTERM_BP_FAT	embryonic development ending in birth or egg hatching	11	0.5	0.043	2
GOTERM_BP_FAT	negative regulation of cellular biosynthetic process	11	0.5	0.045	2
GOTERM_BP_FAT	intracellular transport	11	0.5	0.046	2
GOTERM_BP_FAT	negative regulation of biosynthetic process	11	0.5	0.048	2
GOTERM_BP_FAT	chromatin assembly or disassembly	5	0.2	0.049	3.6
GOTERM_BP_FAT	tube development	8	0.3	0.05	2.4
GOTERM_BP_FAT	RNA transport	4	0.2	0.05	4.8
GOTERM_BP_FAT	establishment of RNA localization	4	0.2	0.05	4.8
GOTERM_BP_FAT	nucleic acid transport	4	0.2	0.05	4.8
GOTERM_BP_FAT	regulation of myeloid leukocyte differentiation	3	0.1	0.051	8.2
GOTERM_BP_FAT	RNA localization	4	0.2	0.052	4.7
GOTERM_BP_FAT	T cell differentiation in the thymus	3	0.1	0.061	7.4
GOTERM_BP_FAT	regulation of cellular protein metabolic process	8	0.3	0.064	2.3
GOTERM_BP_FAT	hemopoietic or lymphoid organ development	8	0.3	0.065	2.2
GOTERM_BP_FAT	tube morphogenesis	6	0.2	0.065	2.8
GOTERM_BP_FAT	nucleobase, nucleoside, nucleotide and nucleic acid transport	4	0.2	0.066	4.3
GOTERM_BP_FAT	morphogenesis of an epithelium	6	0.2	0.068	2.7
GOTERM_BP_FAT	hindlimb morphogenesis	3	0.1	0.068	7
GOTERM_BP_FAT	positive regulation of macromolecule biosynthetic process	12	0.5	0.071	1.8
GOTERM_BP_FAT	dorsal/ventral axis specification	2	0.1	0.073	26.3
GOTERM_BP_FAT	mesoderm formation	3	0.1	0.075	6.6
GOTERM_BP_FAT	protein folding	5	0.2	0.076	3.1
GOTERM_BP_FAT	positive regulation of transcription	11	0.5	0.077	1.8
GOTERM_BP_FAT	circadian rhythm	3	0.1	0.079	6.4
GOTERM_BP_FAT	immune system development	8	0.3	0.079	2.1
GOTERM_BP_FAT	mesoderm morphogenesis	3	0.1	0.082	6.2
GOTERM_BP_FAT	cellular protein localization	8	0.3	0.084	2.1
GOTERM_BP_FAT	cell cycle	13	0.5	0.085	1.7
GOTERM_BP_FAT	positive regulation of epithelial cell differentiation	2	0.1	0.085	22.6
GOTERM_BP_FAT	regulation of protein kinase activity	6	0.2	0.086	2.5
GOTERM_BP_FAT	cellular macromolecule localization	8	0.3	0.086	2.1
GOTERM_BP_FAT	positive regulation of gene expression	11	0.5	0.089	1.8
GOTERM_BP_FAT	positive regulation of cellular biosynthetic process	12	0.5	0.089	1.7
GOTERM_BP_FAT	positive regulation of biosynthetic process	12	0.5	0.093	1.7
GOTERM_BP_FAT	exocrine system development	3	0.1	0.094	5.8
GOTERM_BP_FAT	regulation of kinase activity	6	0.2	0.095	2.5
GOTERM_BP_FAT	cell morphogenesis	8	0.3	0.096	2
GOTERM_BP_FAT	glial cell fate commitment	2	0.1	0.096	19.8
GOTERM_CC_FAT	nuclear lumen	28	1.2	5.7e-07	2.9
GOTERM_CC_FAT	intracellular organelle lumen	31	1.3	2.5e-06	2.5
GOTERM_CC_FAT	organelle lumen	31	1.3	2.6e-06	2.5
GOTERM_CC_FAT	membrane-enclosed lumen	31	1.3	5.1e-06	2.4
GOTERM_CC_FAT	ribonucleoprotein complex	17	0.7	3.4e-05	3.4
GOTERM_CC_FAT	nucleoplasm	19	0.8	6.9e-05	2.9
GOTERM_CC_FAT	non-membrane-bounded organelle	38	1.6	0.00018	1.8
GOTERM_CC_FAT	intracellular non-membrane-bounded organelle	38	1.6	0.00018	1.8
GOTERM_CC_FAT	spliceosome	8	0.3	0.00037	6
GOTERM_CC_FAT	lamellipodium	6	0.2	0.00056	8.8
GOTERM_CC_FAT	cell leading edge	7	0.3	0.0013	5.8
GOTERM_CC_FAT	chromocenter	3	0.1	0.0017	46.3
GOTERM_CC_FAT	nucleoplasm part	14	0.6	0.0034	2.5
GOTERM_CC_FAT	nucleolus	10	0.4	0.0061	3
GOTERM_CC_FAT	perinuclear region of cytoplasm	7	0.3	0.016	3.4
GOTERM_CC_FAT	heterochromatin	4	0.2	0.017	7.3
GOTERM_CC_FAT	nuclear chromatin	4	0.2	0.021	6.7
GOTERM_CC_FAT	actin cytoskeleton	7	0.3	0.023	3.2
GOTERM_CC_FAT	AP-type membrane coat adaptor complex	3	0.1	0.029	11.1
GOTERM_CC_FAT	clathrin adaptor complex	3	0.1	0.029	11.1
GOTERM_CC_FAT	Golgi apparatus	14	0.6	0.031	1.9
GOTERM_CC_FAT	chromatin	6	0.2	0.032	3.4
GOTERM_CC_FAT	Golgi apparatus part	7	0.3	0.035	2.9
GOTERM_CC_FAT	cell projection	12	0.5	0.045	1.9
GOTERM_CC_FAT	cell cortex	5	0.2	0.046	3.7
GOTERM_CC_FAT	clathrin coat	3	0.1	0.051	8.2
GOTERM_CC_FAT	nuclear heterochromatin	3	0.1	0.054	7.9
GOTERM_CC_FAT	ribosome	6	0.2	0.056	2.9
GOTERM_CC_FAT	nuclear speck	4	0.2	0.072	4.1
GOTERM_CC_FAT	centromeric heterochromatin	2	0.1	0.073	26.5
GOTERM_CC_FAT	trans-Golgi network	3	0.1	0.09	5.9
GOTERM_CC_FAT	ruffle	3	0.1	0.09	5.9
GOTERM_CC_FAT	cytoplasmic vesicle	10	0.4	0.095	1.8
GOTERM_CC_FAT	nuclear chromosome part	4	0.2	0.099	3.6
GOTERM_MF_FAT	RNA binding	33	1.4	5.3e-11	3.9
GOTERM_MF_FAT	nucleotide binding	51	2.1	8.9e-06	1.8
GOTERM_MF_FAT	chromatin binding	9	0.4	0.00076	4.6
GOTERM_MF_FAT	DNA binding	38	1.6	0.0012	1.7
GOTERM_MF_FAT	ATPase activity, coupled	10	0.4	0.002	3.5
GOTERM_MF_FAT	profilin binding	3	0.1	0.0023	39.5
GOTERM_MF_FAT	cytoskeletal protein binding	13	0.5	0.0061	2.5
GOTERM_MF_FAT	single-stranded DNA binding	4	0.2	0.0081	9.6
GOTERM_MF_FAT	enzyme binding	9	0.4	0.0084	3.1
GOTERM_MF_FAT	ATPase activity	10	0.4	0.0091	2.8
GOTERM_MF_FAT	structure-specific DNA binding	5	0.2	0.015	5.2
GOTERM_MF_FAT	ATP binding	28	1.2	0.022	1.5
GOTERM_MF_FAT	ATP-dependent helicase activity	5	0.2	0.023	4.6
GOTERM_MF_FAT	purine NTP-dependent helicase activity	5	0.2	0.023	4.6
GOTERM_MF_FAT	helicase activity	6	0.2	0.023	3.7
GOTERM_MF_FAT	adenyl ribonucleotide binding	28	1.2	0.026	1.5
GOTERM_MF_FAT	adenyl nucleotide binding	29	1.2	0.027	1.5
GOTERM_MF_FAT	actin binding	9	0.4	0.029	2.5
GOTERM_MF_FAT	purine nucleoside binding	29	1.2	0.03	1.5
GOTERM_MF_FAT	nucleoside binding	29	1.2	0.032	1.5
GOTERM_MF_FAT	protein serine/threonine kinase activity	11	0.5	0.04	2.1
GOTERM_MF_FAT	transcription repressor activity	7	0.3	0.05	2.6
GOTERM_MF_FAT	cyclin-dependent protein kinase activity	3	0.1	0.054	7.9
GOTERM_MF_FAT	purine ribonucleotide binding	31	1.3	0.061	1.4
GOTERM_MF_FAT	ribonucleotide binding	31	1.3	0.061	1.4
GOTERM_MF_FAT	histone demethylase activity	2	0.1	0.061	31.6
GOTERM_MF_FAT	purine nucleotide binding	32	1.3	0.063	1.4
GOTERM_MF_FAT	demethylase activity	2	0.1	0.096	19.8

## Sheet: In all 3 ALL
term	pvalue	fold	mutant			Column Labels																	Eif4a3		Magoh		Rbm8a
non-membrane-bounded organelle	1.5e-12	2	Magoh			Eif4a3			Magoh			Rbm8a			(blank)			Total Average of pvalue	Total Average of fold	Total Count of pvalue2		Row Labels	Average of pvalue	Average of fold	Average of pvalue	Average of fold	Average of pvalue	Average of fold	Total Count of pvalue2
intracellular non-membrane-bounded organelle	1.5e-12	2	Magoh		Row Labels	Average of pvalue	Average of fold	Count of pvalue2	Average of pvalue	Average of fold	Count of pvalue2	Average of pvalue	Average of fold	Count of pvalue2	Average of pvalue	Average of fold	Count of pvalue2					adenyl nucleotide binding	8.5e-05	1.6	5.8e-05	1.6	0.027	1.5	3
nucleotide binding	2.1e-10	1.8	Magoh		acid-amino acid ligase activity				0.046	2.1	1							0.046	2.1	1		adenyl ribonucleotide binding	3.5e-05	1.7	2.2e-05	1.7	0.026	1.5	3
RNA binding	9.3e-10	2.6	Magoh		actin binding							0.029	2.5	1				0.029	2.5	1		ATP binding	4.5e-05	1.7	1.5e-05	1.7	0.022	1.5	3
translation	4.1e-09	3.4	Magoh		actin cytoskeleton							0.023	3.2	1				0.023	3.2	1		ATPase activity	0.0035	2.3	5.1e-06	3	0.0091	2.8	3
cell cycle	9.2e-09	2.6	Magoh		adenyl nucleotide binding	8.5e-05	1.6	1	5.8e-05	1.6	1	0.027	1.5	1				0.00904767	1.56667	3		ATPase activity, coupled	0.0026	2.5	5.4e-06	3.3	0.002	3.5	3
nuclear lumen	5.9e-08	2.2	Magoh		adenyl ribonucleotide binding	3.5e-05	1.7	1	2.2e-05	1.7	1	0.026	1.5	1				0.00868567	1.63333	3		ATP-dependent helicase activity	0.079	2.6	0.00015	4.5	0.023	4.6	3
ribonucleoprotein complex	9.5e-08	2.8	Magoh		amino acid activation				0.044	3.7	1							0.044	3.7	1		cell cycle	0.00045	1.9	9.2e-09	2.6	0.085	1.7	3
intracellular organelle lumen	2.2e-07	2	Magoh		aminoacyl-tRNA ligase activity				0.046	3.7	1							0.046	3.7	1		chromatin	7.6e-05	3.6	3.8e-05	3.6	0.032	3.4	3
organelle lumen	2.4e-07	2	Magoh		anatomical structure homeostasis				0.034	2.9	1							0.034	2.9	1		chromatin binding	0.00088	3.1	0.00046	3.2	0.00076	4.6	3
chromosome	3.7e-07	2.9	Magoh		AP-type membrane coat adaptor complex							0.029	11.1	1				0.029	11.1	1		chromatin modification	0.00011	2.9	0.0015	2.5	0.03	2.7	3
membrane-enclosed lumen	7.3e-07	1.9	Magoh		ATP binding	4.5e-05	1.7	1	1.5e-05	1.7	1	0.022	1.5	1				0.00735333	1.63333	3		chromatin organization	0.0002	2.5	0.00095	2.3	0.0021	3	3
organelle inner membrane	1.1e-06	3.1	Magoh		ATP biosynthetic process	0.0078	3.5	1	0.0099	3.3	1							0.00885	3.4	2		chromosome organization	0.00017	2.3	5.5e-05	2.4	0.00018	3.1	3
mitochondrial inner membrane	1.5e-06	3.1	Magoh		ATP metabolic process	0.013	3.2	1	0.016	3	1							0.0145	3.1	2		DNA binding	0.0011	1.5	0.00022	1.5	0.0012	1.7	3
cell cycle process	1.5e-06	2.7	Magoh		ATP synthesis coupled proton transport	0.083	3.9	1	0.0041	5.6	1							0.04355	4.75	2		helicase activity	0.022	2.6	7.4e-05	3.8	0.023	3.7	3
RNA splicing	1.7e-06	3.6	Magoh		ATPase activity	0.0035	2.3	1	5.1e-06	3	1	0.0091	2.8	1				0.0042017	2.7	3		heterochromatin	0.00027	6.2	0.0004	5.8	0.017	7.3	3
mRNA metabolic process	2.7e-06	2.9	Magoh		ATPase activity, coupled	0.0026	2.5	1	5.4e-06	3.3	1	0.002	3.5	1				0.00153513	3.1	3		intracellular non-membrane-bounded organelle	6.3e-09	1.8	1.5e-12	2	0.00018	1.8	3
organelle envelope	3.4e-06	2.4	Magoh		ATPase activity, coupled to transmembrane movement of ions				0.045	3.1	1							0.045	3.1	1		intracellular organelle lumen	8.9e-09	2.2	2.2e-07	2	2.5e-06	2.5	3
envelope	3.7e-06	2.4	Magoh		ATPase activity, coupled to transmembrane movement of ions, phosphorylative mechanism	0.064	3.3	1										0.064	3.3	1		intracellular transport	0.095	1.5	0.049	1.6	0.046	2	3
ATPase activity	5.1e-06	3	Magoh		ATP-dependent helicase activity	0.079	2.6	1	0.00015	4.5	1	0.023	4.6	1				0.03405	3.9	3		membrane-enclosed lumen	1.4e-08	2.1	7.3e-07	1.9	5.1e-06	2.4	3
chromosomal part	5.1e-06	2.9	Magoh		Barr body	0.097	19.7	1										0.097	19.7	1		mRNA metabolic process	8.1e-16	4.7	2.7e-06	2.9	2.9e-11	6	3
ATPase activity, coupled	5.4e-06	3.3	Magoh		biopolymer methylation	0.014	3.5	1	0.056	2.9	1							0.035	3.2	2		mRNA processing	1.6e-15	5.1	2.8e-05	2.9	1.1e-10	6.3	3
mitochondrial membrane	6.8e-06	2.7	Magoh		blastocyst development	0.063	3.3	1	0.072	3.2	1							0.0675	3.25	2		non-membrane-bounded organelle	6.3e-09	1.8	1.5e-12	2	0.00018	1.8	3
mitochondrial envelope	7e-06	2.7	Magoh		branching involved in mammary gland duct morphogenesis				0.017	7.2	1							0.017	7.2	1		nuclear chromatin	0.00044	5.7	0.00064	5.4	0.021	6.7	3
cell division	8.3e-06	2.9	Magoh		branching morphogenesis of a tube				0.054	2.6	1							0.054	2.6	1		nuclear chromosome part	0.015	3.1	0.0065	3.2	0.099	3.6	3
mitotic cell cycle	9.5e-06	3.1	Magoh		cell aging	0.046	4.9	1										0.046	4.9	1		nuclear heterochromatin	0.00022	7.9	0.0023	6.4	0.054	7.9	3
ATP binding	1.5e-05	1.7	Magoh		cell cortex							0.046	3.7	1				0.046	3.7	1		nuclear lumen	2.6e-09	2.4	5.9e-08	2.2	5.7e-07	2.9	3
adenyl ribonucleotide binding	2.2e-05	1.7	Magoh		cell cycle	0.00045	1.9	1	9.2e-09	2.6	1	0.085	1.7	1				0.0284833	2.06667	3		nuclear speck	0.00044	4.4	0.095	2.5	0.072	4.1	3
posttranscriptional regulation of gene expression	2.7e-05	3.7	Magoh		cell cycle arrest	0.074	3.1	1	0.025	3.6	1							0.0495	3.35	2		nucleolus	3.9e-06	3.1	0.00072	2.4	0.0061	3	3
mRNA processing	2.8e-05	2.9	Magoh		cell cycle checkpoint				0.017	3.9	1							0.017	3.9	1		nucleoplasm	2.1e-05	2.2	0.00016	2	6.9e-05	2.9	3
protein methyltransferase activity	3.3e-05	7	Magoh		cell cycle phase	0.075	1.6	1	9.5e-05	2.5	1							0.0375475	2.05	2		nucleoplasm part	0.011	1.8	0.00067	2	0.0034	2.5	3
chromatin	3.8e-05	3.6	Magoh		cell cycle process	0.0033	2	1	1.5e-06	2.7	1							0.00165075	2.35	2		nucleoside binding	0.00013	1.6	9.2e-05	1.6	0.032	1.5	3
mitosis	4.1e-05	3.2	Magoh		cell division	0.0054	2.2	1	8.3e-06	2.9	1							0.00270415	2.55	2		nucleotide binding	2.8e-12	1.9	2.1e-10	1.8	8.9e-06	1.8	3
nuclear division	4.1e-05	3.2	Magoh		cell leading edge				0.031	2.7	1	0.0013	5.8	1				0.01615	4.25	2		organelle lumen	3.9e-09	2.2	2.4e-07	2	2.6e-06	2.5	3
M phase of mitotic cell cycle	5.4e-05	3.2	Magoh		cell morphogenesis							0.096	2	1				0.096	2	1		phosphate metabolic process	0.061	1.4	0.02	1.5	0.025	1.7	3
chromosome organization	5.5e-05	2.4	Magoh		cell projection							0.045	1.9	1				0.045	1.9	1		phosphorus metabolic process	0.061	1.4	0.02	1.5	0.025	1.7	3
adenyl nucleotide binding	5.8e-05	1.6	Magoh		cell-cell adherens junction				0.05	4.8	1							0.05	4.8	1		phosphorylation	0.045	1.4	0.0065	1.6	0.037	1.8	3
organelle fission	6.5e-05	3.1	Magoh		cellular macromolecular complex assembly	0.04	2	1										0.04	2	1		positive regulation of biosynthetic process	0.098	1.4	0.059	1.5	0.093	1.7	3
helicase activity	7.4e-05	3.8	Magoh		cellular macromolecular complex subunit organization	0.081	1.8	1										0.081	1.8	1		positive regulation of cellular biosynthetic process	0.092	1.4	0.054	1.5	0.089	1.7	3
purine nucleoside binding	7.7e-05	1.6	Magoh		cellular macromolecule catabolic process				0.012	1.6	1							0.012	1.6	1		protein folding	0.025	2.5	0.004	3	0.076	3.1	3
mitochondrial part	7.8e-05	2.2	Magoh		cellular macromolecule localization				0.058	1.7	1	0.086	2.1	1				0.072	1.9	2		protein serine/threonine kinase activity	0.018	1.8	0.092	1.5	0.04	2.1	3
DNA repair	9e-05	2.9	Magoh		cellular protein catabolic process				0.0079	1.7	1							0.0079	1.7	1		purine NTP-dependent helicase activity	0.079	2.6	0.00015	4.5	0.023	4.6	3
nucleoside binding	9.2e-05	1.6	Magoh		cellular protein localization				0.056	1.7	1	0.084	2.1	1				0.07	1.9	2		purine nucleoside binding	0.00011	1.6	7.7e-05	1.6	0.03	1.5	3
cell cycle phase	9.5e-05	2.5	Magoh		cellular response to stress				0.00034	2.2	1							0.00034	2.2	1		purine nucleotide binding	0.00023	1.5	0.00022	1.5	0.063	1.4	3
translation factor activity, nucleic acid binding	9.9e-05	4.3	Magoh		centromeric heterochromatin							0.073	26.5	1				0.073	26.5	1		purine ribonucleotide binding	0.00011	1.5	0.0001	1.5	0.061	1.4	3
ribonucleotide binding	0.0001	1.5	Magoh		centrosome	0.02	2.5	1	0.029	2.3	1							0.0245	2.4	2		regulation of transcription	0.054	1.2	0.0029	1.3	0.028	1.4	3
purine ribonucleotide binding	0.0001	1.5	Magoh		centrosome organization				0.095	5.7	1							0.095	5.7	1		ribonucleoprotein complex	2.1e-14	3.8	9.5e-08	2.8	3.4e-05	3.4	3
spliceosome	0.00013	3.9	Magoh		chaperonin-containing T-complex	0.012	16.9	1										0.012	16.9	1		ribonucleotide binding	0.00011	1.5	0.0001	1.5	0.061	1.4	3
purine NTP-dependent helicase activity	0.00015	4.5	Magoh		chordate embryonic development							0.04	2.1	1				0.04	2.1	1		ribosome	0.00011	3.3	0.00021	3.1	0.056	2.9	3
ATP-dependent helicase activity	0.00015	4.5	Magoh		chromatin	7.6e-05	3.6	1	3.8e-05	3.6	1	0.032	3.4	1				0.0107047	3.53333	3		RNA binding	2.6e-22	3.9	9.3e-10	2.6	5.3e-11	3.9	3
spindle	0.00016	4.1	Magoh		chromatin assembly or disassembly							0.049	3.6	1				0.049	3.6	1		RNA processing	5.2e-15	3.9	0.00046	2.1	1.4e-07	4	3
nucleoplasm	0.00016	2	Magoh		chromatin binding	0.00088	3.1	1	0.00046	3.2	1	0.00076	4.6	1				0.0007	3.63333	3		RNA splicing	6.4e-15	5.7	1.7e-06	3.6	7.1e-11	7.5	3
ribosome	0.00021	3.1	Magoh		chromatin modification	0.00011	2.9	1	0.0015	2.5	1	0.03	2.7	1				0.0105367	2.7	3		single-stranded DNA binding	0.056	4.5	0.066	4.3	0.0081	9.6	3
purine nucleotide binding	0.00022	1.5	Magoh		chromatin organization	0.0002	2.5	1	0.00095	2.3	1	0.0021	3	1				0.00108333	2.6	3		spliceosome	2e-09	6	0.00013	3.9	0.00037	6	3
DNA binding	0.00022	1.5	Magoh		chromatin remodeling complex				0.045	3.7	1							0.045	3.7	1		transcription	0.023	1.3	0.0045	1.4	0.021	1.5	3
M phase	0.00024	2.5	Magoh		chromocenter							0.0017	46.3	1				0.0017	46.3	1		translation	7.8e-08	3.3	4.1e-09	3.4	0.0072	2.7	3
response to DNA damage stimulus	0.00029	2.5	Magoh		chromosomal part	0.00046	2.5	1	5.1e-06	2.9	1							0.00023255	2.7	2		ATP biosynthetic process	0.0078	3.5	0.0099	3.3			2
cellular response to stress	0.00034	2.2	Magoh		chromosome	0.00024	2.4	1	3.7e-07	2.9	1							0.000120185	2.65	2		ATP metabolic process	0.013	3.2	0.016	3			2
histone methyltransferase activity	0.00034	7.3	Magoh		chromosome condensation							0.031	10.8	1				0.031	10.8	1		ATP synthesis coupled proton transport	0.083	3.9	0.0041	5.6			2
structural constituent of ribosome	0.00036	3.3	Magoh		chromosome organization	0.00017	2.3	1	5.5e-05	2.4	1	0.00018	3.1	1				0.000135	2.6	3		biopolymer methylation	0.014	3.5	0.056	2.9			2
mitochondrion	0.00037	1.6	Magoh		chromosome segregation				0.038	3.2	1							0.038	3.2	1		blastocyst development	0.063	3.3	0.072	3.2			2
heterochromatin	0.0004	5.8	Magoh		chromosome, centromeric region				0.03	2.7	1							0.03	2.7	1		cell cycle arrest	0.074	3.1	0.025	3.6			2
cytosol	0.0004	2	Magoh		circadian rhythm							0.079	6.4	1				0.079	6.4	1		cell cycle phase	0.075	1.6	9.5e-05	2.5			2
ubiquitin-ubiquitin ligase activity	0.00042	23.5	Magoh		cis-trans isomerase activity				0.086	3.8	1							0.086	3.8	1		cell cycle process	0.0033	2	1.5e-06	2.7			2
RNA processing	0.00046	2.1	Magoh		clathrin adaptor complex							0.029	11.1	1				0.029	11.1	1		cell division	0.0054	2.2	8.3e-06	2.9			2
chromatin binding	0.00046	3.2	Magoh		clathrin coat							0.051	8.2	1				0.051	8.2	1		cell leading edge			0.031	2.7	0.0013	5.8	2
transcription factor binding	0.00056	2.4	Magoh		cyclin-dependent protein kinase activity							0.054	7.9	1				0.054	7.9	1		cellular macromolecule localization			0.058	1.7	0.086	2.1	2
nuclear chromatin	0.00064	5.4	Magoh		cytoplasmic membrane-bounded vesicle	0.061	1.6	1	0.093	1.5	1							0.077	1.55	2		cellular protein localization			0.056	1.7	0.084	2.1	2
generation of precursor metabolites and energy	0.00065	2.5	Magoh		cytoplasmic vesicle							0.095	1.8	1				0.095	1.8	1		centrosome	0.02	2.5	0.029	2.3			2
nucleoplasm part	0.00067	2	Magoh		cytoskeletal part				0.043	1.4	1							0.043	1.4	1		chromosomal part	0.00046	2.5	5.1e-06	2.9			2
nucleolus	0.00072	2.4	Magoh		cytoskeletal protein binding				0.047	1.6	1	0.0061	2.5	1				0.02655	2.05	2		chromosome	0.00024	2.4	3.7e-07	2.9			2
proton-transporting two-sector ATPase complex	0.00083	6.2	Magoh		cytoskeleton				0.017	1.4	1							0.017	1.4	1		cytoplasmic membrane-bounded vesicle	0.061	1.6	0.093	1.5			2
protein modification by small protein conjugation or removal	0.0009	3.6	Magoh		cytoskeleton organization				0.096	1.6	1							0.096	1.6	1		cytoskeletal protein binding			0.047	1.6	0.0061	2.5	2
chromatin organization	0.00095	2.3	Magoh		cytoskeleton-dependent intracellular transport	0.013	5.4	1										0.013	5.4	1		cytosol	0.0016	1.9	0.0004	2			2
ribonucleotide metabolic process	0.0011	3.3	Magoh		cytosol	0.0016	1.9	1	0.0004	2	1							0.001	1.95	2		DNA packaging	0.063	2.5			0.039	3.9	2
purine ribonucleotide biosynthetic process	0.0011	3.5	Magoh		cytosolic part	0.021	3.8	1										0.021	3.8	1		energy coupled proton transport, down electrochemical gradient	0.083	3.9	0.0041	5.6			2
protein polyubiquitination	0.0013	10.1	Magoh		cytosolic ribosome	0.075	6.6	1										0.075	6.6	1		envelope	0.0013	2	3.7e-06	2.4			2
N-methyltransferase activity	0.0014	5.6	Magoh		demethylase activity							0.096	19.8	1				0.096	19.8	1		enzyme binding			0.061	1.8	0.0084	3.1	2
proton-transporting ATP synthase complex	0.0014	9.8	Magoh		DNA binding	0.0011	1.5	1	0.00022	1.5	1	0.0012	1.7	1				0.00084	1.56667	3		generation of precursor metabolites and energy	0.031	1.9	0.00065	2.5			2
ribonucleotide biosynthetic process	0.0015	3.4	Magoh		DNA damage checkpoint				0.056	4.6	1							0.056	4.6	1		Golgi apparatus	0.04	1.5			0.031	1.9	2
chromatin modification	0.0015	2.5	Magoh		DNA damage response, signal transduction				0.084	3	1							0.084	3	1		Golgi apparatus part	0.013	2.3			0.035	2.9	2
identical protein binding	0.0015	2.3	Magoh		DNA integrity checkpoint				0.07	4.1	1							0.07	4.1	1		histone methyltransferase activity	0.012	5.5	0.00034	7.3			2
transcription cofactor activity	0.0018	2.7	Magoh		DNA metabolic process				0.003	2	1							0.003	2	1		histone-lysine N-methyltransferase activity	0.031	5.8	0.036	5.4			2
protein modification by small protein conjugation	0.0021	3.9	Magoh		DNA packaging	0.063	2.5	1				0.039	3.9	1				0.051	3.2	2		hormone receptor binding	0.019	4.8	0.097	3.6			2
transcription coactivator activity	0.0021	3.5	Magoh		DNA repair				9e-05	2.9	1							9e-05	2.9	1		hydrogen transport	0.059	3.4	0.0043	4.5			2
hydrogen ion transmembrane transporter activity	0.0022	3.9	Magoh		DNA-dependent ATPase activity				0.092	3.7	1							0.092	3.7	1		lamellipodium			0.089	2.9	0.00056	8.8	2
purine nucleotide biosynthetic process	0.0022	3	Magoh		dorsal/ventral axis specification							0.073	26.3	1				0.073	26.3	1		lysine N-methyltransferase activity	0.031	5.8	0.036	5.4			2
nucleobase, nucleoside, nucleotide and nucleic acid biosynthetic process	0.0023	2.7	Magoh		double-stranded DNA binding	0.065	4.3	1										0.065	4.3	1		M phase	0.053	1.8	0.00024	2.5			2
nucleobase, nucleoside and nucleotide biosynthetic process	0.0023	2.7	Magoh		embryonic development ending in birth or egg hatching							0.043	2	1				0.043	2	1		M phase of mitotic cell cycle	0.045	2	5.4e-05	3.2			2
nuclear heterochromatin	0.0023	6.4	Magoh		embryonic hemopoiesis				0.033	10.3	1							0.033	10.3	1		macromolecular complex assembly	0.09	1.6	0.07	1.6			2
regulation of epithelial cell proliferation	0.0023	4.3	Magoh		embryonic hindlimb morphogenesis							0.031	10.8	1				0.031	10.8	1		melanosome	0.064	2.8	0.027	3.1			2
purine ribonucleotide metabolic process	0.0025	3.2	Magoh		embryonic morphogenesis							0.038	2.2	1				0.038	2.2	1		membrane organization	0.078	1.7	0.056	1.8			2
regulation of transcription	0.0029	1.3	Magoh		energy coupled proton transport, down electrochemical gradient	0.083	3.9	1	0.0041	5.6	1							0.04355	4.75	2		methylation	0.023	3.2	0.08	2.6			2
DNA metabolic process	0.003	2	Magoh		envelope	0.0013	2	1	3.7e-06	2.4	1							0.00065185	2.2	2		microtubule cytoskeleton	0.065	1.6	0.019	1.7			2
protein ubiquitination	0.003	4.1	Magoh		enzyme binding				0.061	1.8	1	0.0084	3.1	1				0.0347	2.45	2		microtubule organizing center	0.051	2.1	0.069	2			2
monovalent inorganic cation transmembrane transporter activity	0.0032	3.6	Magoh		ER overload response				0.021	12.8	1							0.021	12.8	1		mitochondrial envelope	0.0051	2	7e-06	2.7			2
response to UV	0.0032	5.9	Magoh		ER-nuclear signaling pathway				0.035	5.5	1							0.035	5.5	1		mitochondrial inner membrane	0.038	1.9	1.5e-06	3.1			2
protein catabolic process	0.0035	1.8	Magoh		ESC/E(Z) complex				0.078	24.7	1							0.078	24.7	1		mitochondrial membrane	0.0058	2	6.8e-06	2.7			2
organelle membrane	0.0035	1.7	Magoh		establishment of RNA localization							0.05	4.8	1				0.05	4.8	1		mitochondrial part	0.0036	1.9	7.8e-05	2.2			2
response to protein stimulus	0.0038	3.5	Magoh		ethanolamine and derivative metabolic process	0.088	6	1										0.088	6	1		mitochondrion	0.051	1.3	0.00037	1.6			2
proton transport	0.0039	4.6	Magoh		eukaryotic translation elongation factor 1 complex	0.097	19.7	1										0.097	19.7	1		mitosis	0.04	2.1	4.1e-05	3.2			2
modification-dependent macromolecule catabolic process	0.0039	1.8	Magoh		exocrine system development							0.094	5.8	1				0.094	5.8	1		mitotic cell cycle	0.04	1.9	9.5e-06	3.1			2
modification-dependent protein catabolic process	0.0039	1.8	Magoh		formation of primary germ layer							0.014	7.9	1				0.014	7.9	1		morphogenesis of an epithelium			0.067	2	0.068	2.7	2
protein folding	0.004	3	Magoh		G1/S transition checkpoint				0.033	10.3	1							0.033	10.3	1		neuroblast proliferation	0.064	7.2	0.069	6.8			2
ATP synthesis coupled proton transport	0.0041	5.6	Magoh		gastrulation							0.014	5.3	1				0.014	5.3	1		nitrogen compound biosynthetic process	0.022	1.9	0.016	1.9			2
energy coupled proton transport, down electrochemical gradient	0.0041	5.6	Magoh		general RNA polymerase II transcription factor activity				0.052	4.7	1							0.052	4.7	1		N-methyltransferase activity	0.001	6	0.0014	5.6			2
hydrogen transport	0.0043	4.5	Magoh		generation of precursor metabolites and energy	0.031	1.9	1	0.00065	2.5	1							0.015825	2.2	2		nuclear chromosome	0.012	2.9	0.016	2.8			2
transcription	0.0045	1.4	Magoh		gland morphogenesis				0.098	2.4	1							0.098	2.4	1		nuclear division	0.04	2.1	4.1e-05	3.2			2
nucleotide biosynthetic process	0.005	2.6	Magoh		glial cell fate commitment							0.096	19.8	1				0.096	19.8	1		nuclear hormone receptor binding	0.012	5.5	0.071	4.1			2
macromolecule catabolic process	0.0053	1.7	Magoh		Golgi apparatus	0.04	1.5	1				0.031	1.9	1				0.0355	1.7	2		nucleobase, nucleoside and nucleotide biosynthetic process	0.0043	2.6	0.0023	2.7			2
ubiquitin ligase complex	0.0053	4.3	Magoh		Golgi apparatus part	0.013	2.3	1				0.035	2.9	1				0.024	2.6	2		nucleobase, nucleoside, nucleotide and nucleic acid biosynthetic process	0.0043	2.6	0.0023	2.7			2
oxidative phosphorylation	0.0056	4.3	Magoh		helicase activity	0.022	2.6	1	7.4e-05	3.8	1	0.023	3.7	1				0.0150247	3.36667	3		nucleoside metabolic process	0.019	3.8	0.08	3.1			2
tubulin binding	0.0056	3.7	Magoh		hemopoiesis							0.039	2.5	1				0.039	2.5	1		nucleoside triphosphate biosynthetic process	0.0013	3.8	0.0065	3.2			2
purine ribonucleoside triphosphate biosynthetic process	0.0057	3.3	Magoh		hemopoietic or lymphoid organ development							0.065	2.2	1				0.065	2.2	1		nucleoside triphosphate metabolic process	0.0048	3.1	0.019	2.7			2
ribonucleoside triphosphate biosynthetic process	0.0057	3.3	Magoh		heterochromatin	0.00027	6.2	1	0.0004	5.8	1	0.017	7.3	1				0.00589	6.43333	3		nucleotide biosynthetic process	0.0095	2.5	0.005	2.6			2
purine nucleoside triphosphate biosynthetic process	0.0061	3.3	Magoh		hindlimb morphogenesis							0.068	7	1				0.068	7	1		organelle envelope	0.0012	2	3.4e-06	2.4			2
Srb-mediator complex	0.0063	6.6	Magoh		histone demethylase activity							0.061	31.6	1				0.061	31.6	1		organelle fission	0.022	2.2	6.5e-05	3.1			2
mammary gland duct morphogenesis	0.0064	6.6	Magoh		histone methylation				0.035	5.5	1							0.035	5.5	1		organelle inner membrane	0.027	1.9	1.1e-06	3.1			2
phosphorylation	0.0065	1.6	Magoh		histone methyltransferase activity	0.012	5.5	1	0.00034	7.3	1							0.00617	6.4	2		organelle membrane	0.0024	1.7	0.0035	1.7			2
nucleoside triphosphate biosynthetic process	0.0065	3.2	Magoh		histone-lysine N-methyltransferase activity	0.031	5.8	1	0.036	5.4	1							0.0335	5.6	2		oxidative phosphorylation	0.07	3.2	0.0056	4.3			2
nuclear chromosome part	0.0065	3.2	Magoh		hormone receptor binding	0.019	4.8	1	0.097	3.6	1							0.058	4.2	2		perinuclear region of cytoplasm			0.013	2.4	0.016	3.4	2
ion transmembrane transport	0.0072	4.9	Magoh		Hsp90 protein binding				0.083	23.5	1							0.083	23.5	1		phosphatase binding	0.098	5.6	0.018	7			2
purine nucleotide metabolic process	0.0072	2.6	Magoh		hydrogen ion transmembrane transporter activity				0.0022	3.9	1							0.0022	3.9	1		phosphoprotein binding	0.081	6.3	0.091	5.9			2
proteolysis involved in cellular protein catabolic process	0.0074	1.7	Magoh		hydrogen ion transporting ATP synthase activity, rotational mechanism				0.037	9.6	1							0.037	9.6	1		pigment granule	0.064	2.8	0.027	3.1			2
respiratory chain	0.0079	4	Magoh		hydrogen transport	0.059	3.4	1	0.0043	4.5	1							0.03165	3.95	2		positive regulation of gene expression			0.079	1.5	0.089	1.8	2
protein amino acid alkylation	0.0079	4.8	Magoh		identical protein binding				0.0015	2.3	1							0.0015	2.3	1		positive regulation of macromolecule biosynthetic process			0.096	1.4	0.071	1.8	2
protein amino acid methylation	0.0079	4.8	Magoh		immune system development							0.079	2.1	1				0.079	2.1	1		positive regulation of transcription			0.064	1.5	0.077	1.8	2
cellular protein catabolic process	0.0079	1.7	Magoh		in utero embryonic development				0.092	1.7	1							0.092	1.7	1		posttranscriptional regulation of gene expression			2.7e-05	3.7	0.039	3.2	2
translation initiation factor activity	0.008	4	Magoh		inorganic cation transmembrane transporter activity				0.028	2.5	1							0.028	2.5	1		pronucleus	0.075	6.6	0.012	8.2			2
regulation of translation	0.0088	3.1	Magoh		intracellular non-membrane-bounded organelle	6.3e-09	1.8	1	1.5e-12	2	1	0.00018	1.8	1				6.00021e-05	1.86667	3		proteasome complex	0.059	3.4	0.019	3.8			2
purine ribonucleoside triphosphate metabolic process	0.0093	3	Magoh		intracellular organelle lumen	8.9e-09	2.2	1	2.2e-07	2	1	2.5e-06	2.5	1				9.09633e-07	2.23333	3		protein amino acid alkylation	0.031	4.2	0.0079	4.8			2
transcription, DNA-dependent	0.0094	2.8	Magoh		intracellular receptor-mediated signaling pathway				0.065	4.3	1							0.065	4.3	1		protein amino acid methylation	0.031	4.2	0.0079	4.8			2
ribonucleoside triphosphate metabolic process	0.0098	3	Magoh		intracellular transport	0.095	1.5	1	0.049	1.6	1	0.046	2	1				0.0633333	1.7	3		protein catabolic process	0.062	1.5	0.0035	1.8			2
ATP biosynthetic process	0.0099	3.3	Magoh		ion transmembrane transport				0.0072	4.9	1							0.0072	4.9	1		protein kinase activity	0.097	1.4	0.068	1.5			2
translation elongation factor activity	0.011	5.7	Magoh		iron-sulfur cluster assembly	0.03	10.8	1										0.03	10.8	1		protein methyltransferase activity	0.0066	5	3.3e-05	7			2
protein phosphatase binding	0.011	8.3	Magoh		lamellipodium				0.089	2.9	1	0.00056	8.8	1				0.04478	5.85	2		protein phosphatase binding	0.074	6.6	0.011	8.3			2
RNA biosynthetic process	0.011	2.7	Magoh		large ribosomal subunit	0.075	4	1										0.075	4	1		protein polyubiquitination	0.08	6.3	0.0013	10.1			2
pronucleus	0.012	8.2	Magoh		lateral plasma membrane				0.028	11.1	1							0.028	11.1	1		protein-lysine N-methyltransferase activity	0.031	5.8	0.036	5.4			2
cellular macromolecule catabolic process	0.012	1.6	Magoh		ligase activity, forming aminoacyl-tRNA and related compounds				0.046	3.7	1							0.046	3.7	1		proton transport	0.056	3.4	0.0039	4.6			2
purine nucleoside triphosphate metabolic process	0.012	2.9	Magoh		ligase activity, forming carbon-nitrogen bonds				0.048	2	1							0.048	2	1		proton-transporting ATP synthase complex	0.082	6.2	0.0014	9.8			2
perinuclear region of cytoplasm	0.013	2.4	Magoh		ligase activity, forming carbon-oxygen bonds				0.046	3.7	1							0.046	3.7	1		proton-transporting ATP synthase complex, coupling factor F(o)	0.041	9.1	0.046	8.6			2
mammary gland morphogenesis	0.015	5.2	Magoh		lysine N-methyltransferase activity	0.031	5.8	1	0.036	5.4	1							0.0335	5.6	2		proton-transporting two-sector ATPase complex	0.021	4.7	0.00083	6.2			2
nitrogen compound biosynthetic process	0.016	1.9	Magoh		lysosome organization				0.025	6.2	1							0.025	6.2	1		proton-transporting two-sector ATPase complex, proton-transporting domain	0.002	9	0.02	6.7			2
regulation of binding	0.016	3	Magoh		M phase	0.053	1.8	1	0.00024	2.5	1							0.02662	2.15	2		purine nucleoside metabolic process	0.028	6	0.032	5.7			2
ATP metabolic process	0.016	3	Magoh		M phase of mitotic cell cycle	0.045	2	1	5.4e-05	3.2	1							0.022527	2.6	2		purine nucleoside triphosphate biosynthetic process	0.0012	3.8	0.0061	3.3			2
nuclear chromosome	0.016	2.8	Magoh		macromolecular complex assembly	0.09	1.6	1	0.07	1.6	1							0.08	1.6	2		purine nucleoside triphosphate metabolic process	0.0028	3.4	0.012	2.9			2
branching involved in mammary gland duct morphogenesis	0.017	7.2	Magoh		macromolecular complex subunit organization				0.072	1.6	1							0.072	1.6	1		purine nucleotide biosynthetic process	0.0015	3.1	0.0022	3			2
cytoskeleton	0.017	1.4	Magoh		macromolecule catabolic process				0.0053	1.7	1							0.0053	1.7	1		purine nucleotide metabolic process	0.0051	2.7	0.0072	2.6			2
cell cycle checkpoint	0.017	3.9	Magoh		mammary gland alveolus development				0.069	6.8	1							0.069	6.8	1		purine ribonucleoside metabolic process	0.028	6	0.032	5.7			2
phosphatase binding	0.018	7	Magoh		mammary gland development				0.039	2.8	1							0.039	2.8	1		purine ribonucleoside triphosphate biosynthetic process	0.0011	3.9	0.0057	3.3			2
nucleoside triphosphate metabolic process	0.019	2.7	Magoh		mammary gland duct morphogenesis				0.0064	6.6	1							0.0064	6.6	1		purine ribonucleoside triphosphate metabolic process	0.002	3.5	0.0093	3			2
microtubule cytoskeleton	0.019	1.7	Magoh		mammary gland morphogenesis				0.015	5.2	1							0.015	5.2	1		purine ribonucleotide biosynthetic process	0.00079	3.7	0.0011	3.5			2
proteasome complex	0.019	3.8	Magoh		mediator complex				0.023	12.4	1							0.023	12.4	1		purine ribonucleotide metabolic process	0.0018	3.3	0.0025	3.2			2
phosphate metabolic process	0.02	1.5	Magoh		melanosome	0.064	2.8	1	0.027	3.1	1							0.0455	2.95	2		regulation of cell cycle	0.076	1.8	0.023	2.1			2
phosphorus metabolic process	0.02	1.5	Magoh		membrane organization	0.078	1.7	1	0.056	1.8	1							0.067	1.75	2		regulation of cellular protein metabolic process			0.035	1.8	0.064	2.3	2
response to unfolded protein	0.02	3.8	Magoh		membrane-bounded vesicle	0.068	1.6	1										0.068	1.6	1		regulation of oxygen and reactive oxygen species metabolic process	0.055	35.9	0.057	34.2			2
proton-transporting two-sector ATPase complex, proton-transporting domain	0.02	6.7	Magoh		membrane-enclosed lumen	1.4e-08	2.1	1	7.3e-07	1.9	1	5.1e-06	2.4	1				1.948e-06	2.13333	3		regulation of translation			0.0088	3.1	0.037	4	2
regulation of DNA binding	0.021	3.2	Magoh		mesoderm formation							0.075	6.6	1				0.075	6.6	1		respiratory chain	0.082	3	0.0079	4			2
ER overload response	0.021	12.8	Magoh		mesoderm morphogenesis							0.082	6.2	1				0.082	6.2	1		ribonucleoprotein binding	0.061	4.4	0.071	4.1			2
vacuole	0.022	2.2	Magoh		metallo-sulfur cluster assembly	0.03	10.8	1										0.03	10.8	1		ribonucleoside metabolic process	0.0043	5.5	0.026	4.4			2
ubiquitin-dependent protein catabolic process	0.022	2.4	Magoh		methylation	0.023	3.2	1	0.08	2.6	1							0.0515	2.9	2		ribonucleoside triphosphate biosynthetic process	0.0011	3.9	0.0057	3.3			2
mediator complex	0.023	12.4	Magoh		microtubule				0.029	2	1							0.029	2	1		ribonucleoside triphosphate metabolic process	0.0021	3.5	0.0098	3			2
regulation of cell cycle	0.023	2.1	Magoh		microtubule binding				0.029	3.5	1							0.029	3.5	1		ribonucleotide biosynthetic process	0.001	3.6	0.0015	3.4			2
RNA polymerase II transcription mediator activity	0.023	6.4	Magoh		microtubule cytoskeleton	0.065	1.6	1	0.019	1.7	1							0.042	1.65	2		ribonucleotide metabolic process	0.00073	3.4	0.0011	3.3			2
cell cycle arrest	0.025	3.6	Magoh		microtubule organizing center	0.051	2.1	1	0.069	2	1							0.06	2.05	2		spindle	0.058	2.5	0.00016	4.1			2
negative regulation of transcription factor activity	0.025	6.2	Magoh		microtubule-based transport	0.013	8	1										0.013	8	1		structural constituent of ribosome	0.00019	3.5	0.00036	3.3			2
lysosome organization	0.025	6.2	Magoh		mitochondrial envelope	0.0051	2	1	7e-06	2.7	1							0.0025535	2.35	2		structure-specific DNA binding	0.004	4			0.015	5.2	2
nuclear matrix	0.026	4.4	Magoh		mitochondrial inner membrane	0.038	1.9	1	1.5e-06	3.1	1							0.0190008	2.5	2		transcription activator activity	0.085	1.7	0.065	1.8			2
NF-kappaB binding	0.026	6.1	Magoh		mitochondrial membrane	0.0058	2	1	6.8e-06	2.7	1							0.0029034	2.35	2		transcription coactivator activity	0.0051	3.4	0.0021	3.5			2
ribonucleoside metabolic process	0.026	4.4	Magoh		mitochondrial membrane part	0.035	4	1										0.035	4	1		transcription cofactor activity	0.0087	2.5	0.0018	2.7			2
melanosome	0.027	3.1	Magoh		mitochondrial outer membrane	0.052	3	1										0.052	3	1		transcription factor binding	0.01	2.1	0.00056	2.4			2
pigment granule	0.027	3.1	Magoh		mitochondrial part	0.0036	1.9	1	7.8e-05	2.2	1							0.001839	2.05	2		translation elongation factor activity	0.0012	7.3	0.011	5.7			2
inorganic cation transmembrane transporter activity	0.028	2.5	Magoh		mitochondrion	0.051	1.3	1	0.00037	1.6	1							0.025685	1.45	2		translation factor activity, nucleic acid binding	0.00027	4.2	9.9e-05	4.3			2
lateral plasma membrane	0.028	11.1	Magoh		mitosis	0.04	2.1	1	4.1e-05	3.2	1							0.0200205	2.65	2		translation initiation factor activity	0.082	3	0.008	4			2
regulation of transcription factor activity	0.028	3.5	Magoh		mitotic cell cycle	0.04	1.9	1	9.5e-06	3.1	1							0.0200048	2.5	2		tRNA metabolic process	0.095	2.2	0.047	2.4			2
centrosome	0.029	2.3	Magoh		mitotic cell cycle checkpoint				0.032	5.7	1							0.032	5.7	1		unfolded protein binding	0.038	3.2	0.048	3			2
microtubule binding	0.029	3.5	Magoh		modification-dependent macromolecule catabolic process				0.0039	1.8	1							0.0039	1.8	1		Wnt receptor signaling pathway			0.036	2.4	0.024	3.6	2
microtubule	0.029	2	Magoh		modification-dependent protein catabolic process				0.0039	1.8	1							0.0039	1.8	1		acid-amino acid ligase activity			0.046	2.1			1
chromosome, centromeric region	0.03	2.7	Magoh		monovalent inorganic cation transmembrane transporter activity				0.0032	3.6	1							0.0032	3.6	1		actin binding					0.029	2.5	1
cell leading edge	0.031	2.7	Magoh		morphogenesis of a branching structure				0.073	2.2	1							0.073	2.2	1		actin cytoskeleton					0.023	3.2	1
purine ribonucleoside metabolic process	0.032	5.7	Magoh		morphogenesis of an epithelium				0.067	2	1	0.068	2.7	1				0.0675	2.35	2		amino acid activation			0.044	3.7			1
mitotic cell cycle checkpoint	0.032	5.7	Magoh		mRNA binding	0.003	4.9	1										0.003	4.9	1		aminoacyl-tRNA ligase activity			0.046	3.7			1
purine nucleoside metabolic process	0.032	5.7	Magoh		mRNA metabolic process	8.1e-16	4.7	1	2.7e-06	2.9	1	2.9e-11	6	1				9.0001e-07	4.53333	3		anatomical structure homeostasis			0.034	2.9			1
regulation of epithelial cell proliferation involved in prostate gland development	0.033	10.3	Magoh		mRNA processing	1.6e-15	5.1	1	2.8e-05	2.9	1	1.1e-10	6.3	1				9.33337e-06	4.76667	3		AP-type membrane coat adaptor complex					0.029	11.1	1
embryonic hemopoiesis	0.033	10.3	Magoh		mRNA splice site selection	0.015	15.4	1										0.015	15.4	1		ATPase activity, coupled to transmembrane movement of ions			0.045	3.1			1
G1/S transition checkpoint	0.033	10.3	Magoh		ncRNA metabolic process	0.0043	2.5	1										0.0043	2.5	1		ATPase activity, coupled to transmembrane movement of ions, phosphorylative mechanism	0.064	3.3					1
anatomical structure homeostasis	0.034	2.9	Magoh		ncRNA processing	0.033	2.3	1										0.033	2.3	1		Barr body	0.097	19.7					1
nucleotide-excision repair	0.035	5.5	Magoh		negative regulation of binding				0.056	4.6	1							0.056	4.6	1		branching involved in mammary gland duct morphogenesis			0.017	7.2			1
regulation of protein stability	0.035	5.5	Magoh		negative regulation of biosynthetic process							0.048	2	1				0.048	2	1		branching morphogenesis of a tube			0.054	2.6			1
histone methylation	0.035	5.5	Magoh		negative regulation of cellular biosynthetic process							0.045	2	1				0.045	2	1		cell aging	0.046	4.9					1
ER-nuclear signaling pathway	0.035	5.5	Magoh		negative regulation of DNA binding				0.039	5.3	1							0.039	5.3	1		cell cortex					0.046	3.7	1
regulation of cellular protein metabolic process	0.035	1.8	Magoh		negative regulation of epithelial cell proliferation				0.043	5.1	1							0.043	5.1	1		cell cycle checkpoint			0.017	3.9			1
histone-lysine N-methyltransferase activity	0.036	5.4	Magoh		negative regulation of gene expression							0.035	2.1	1				0.035	2.1	1		cell morphogenesis					0.096	2	1
lysine N-methyltransferase activity	0.036	5.4	Magoh		negative regulation of macromolecule biosynthetic process							0.039	2.1	1				0.039	2.1	1		cell projection					0.045	1.9	1
protein-lysine N-methyltransferase activity	0.036	5.4	Magoh		negative regulation of molecular function				0.091	2.1	1							0.091	2.1	1		cell-cell adherens junction			0.05	4.8			1
Wnt receptor signaling pathway	0.036	2.4	Magoh		negative regulation of nitrogen compound metabolic process							0.03	2.2	1				0.03	2.2	1		cellular macromolecular complex assembly	0.04	2					1
hydrogen ion transporting ATP synthase activity, rotational mechanism	0.037	9.6	Magoh		negative regulation of nucleobase, nucleoside, nucleotide and nucleic acid metabolic process							0.029	2.2	1				0.029	2.2	1		cellular macromolecular complex subunit organization	0.081	1.8					1
chromosome segregation	0.038	3.2	Magoh		negative regulation of retinoic acid receptor signaling pathway	0.055	35.9	1										0.055	35.9	1		cellular macromolecule catabolic process			0.012	1.6			1
negative regulation of DNA binding	0.039	5.3	Magoh		negative regulation of RNA metabolic process							0.017	2.5	1				0.017	2.5	1		cellular protein catabolic process			0.0079	1.7			1
response to endoplasmic reticulum stress	0.039	5.3	Magoh		negative regulation of transcription							0.019	2.3	1				0.019	2.3	1		cellular response to stress			0.00034	2.2			1
mammary gland development	0.039	2.8	Magoh		negative regulation of transcription factor activity				0.025	6.2	1							0.025	6.2	1		centromeric heterochromatin					0.073	26.5	1
protein targeting	0.041	2.3	Magoh		negative regulation of transcription, DNA-dependent							0.016	2.6	1				0.016	2.6	1		centrosome organization			0.095	5.7			1
nuclear periphery	0.042	3.8	Magoh		neuroblast proliferation	0.064	7.2	1	0.069	6.8	1							0.0665	7	2		chaperonin-containing T-complex	0.012	16.9					1
negative regulation of epithelial cell proliferation	0.043	5.1	Magoh		neuron maturation	0.049	8.3	1										0.049	8.3	1		chordate embryonic development					0.04	2.1	1
cytoskeletal part	0.043	1.4	Magoh		NF-kappaB binding				0.026	6.1	1							0.026	6.1	1		chromatin assembly or disassembly					0.049	3.6	1
amino acid activation	0.044	3.7	Magoh		nitric-oxide synthase regulator activity				0.056	35.2	1							0.056	35.2	1		chromatin remodeling complex			0.045	3.7			1
tRNA aminoacylation	0.044	3.7	Magoh		nitrogen compound biosynthetic process	0.022	1.9	1	0.016	1.9	1							0.019	1.9	2		chromocenter					0.0017	46.3	1
tRNA aminoacylation for protein translation	0.044	3.7	Magoh		N-methyltransferase activity	0.001	6	1	0.0014	5.6	1							0.0012	5.8	2		chromosome condensation					0.031	10.8	1
chromatin remodeling complex	0.045	3.7	Magoh		non-membrane-bounded organelle	6.3e-09	1.8	1	1.5e-12	2	1	0.00018	1.8	1				6.00021e-05	1.86667	3		chromosome segregation			0.038	3.2			1
ATPase activity, coupled to transmembrane movement of ions	0.045	3.1	Magoh		nuclear body	0.00025	3.6	1										0.00025	3.6	1		chromosome, centromeric region			0.03	2.7			1
proton-transporting ATP synthase complex, coupling factor F(o)	0.046	8.6	Magoh		nuclear chromatin	0.00044	5.7	1	0.00064	5.4	1	0.021	6.7	1				0.00736	5.93333	3		circadian rhythm					0.079	6.4	1
ligase activity, forming carbon-oxygen bonds	0.046	3.7	Magoh		nuclear chromosome	0.012	2.9	1	0.016	2.8	1							0.014	2.85	2		cis-trans isomerase activity			0.086	3.8			1
ligase activity, forming aminoacyl-tRNA and related compounds	0.046	3.7	Magoh		nuclear chromosome part	0.015	3.1	1	0.0065	3.2	1	0.099	3.6	1				0.0401667	3.3	3		clathrin adaptor complex					0.029	11.1	1
aminoacyl-tRNA ligase activity	0.046	3.7	Magoh		nuclear division	0.04	2.1	1	4.1e-05	3.2	1							0.0200205	2.65	2		clathrin coat					0.051	8.2	1
acid-amino acid ligase activity	0.046	2.1	Magoh		nuclear heterochromatin	0.00022	7.9	1	0.0023	6.4	1	0.054	7.9	1				0.01884	7.4	3		cyclin-dependent protein kinase activity					0.054	7.9	1
tRNA metabolic process	0.047	2.4	Magoh		nuclear hormone receptor binding	0.012	5.5	1	0.071	4.1	1							0.0415	4.8	2		cytoplasmic vesicle					0.095	1.8	1
cytoskeletal protein binding	0.047	1.6	Magoh		nuclear import				0.088	3	1							0.088	3	1		cytoskeletal part			0.043	1.4			1
unfolded protein binding	0.048	3	Magoh		nuclear lumen	2.6e-09	2.4	1	5.9e-08	2.2	1	5.7e-07	2.9	1				2.10533e-07	2.5	3		cytoskeleton			0.017	1.4			1
ligase activity, forming carbon-nitrogen bonds	0.048	2	Magoh		nuclear matrix				0.026	4.4	1							0.026	4.4	1		cytoskeleton organization			0.096	1.6			1
intracellular transport	0.049	1.6	Magoh		nuclear mRNA splicing, via spliceosome	0.0005	6.8	1										0.0005	6.8	1		cytoskeleton-dependent intracellular transport	0.013	5.4					1
cell-cell adherens junction	0.05	4.8	Magoh		nuclear periphery				0.042	3.8	1							0.042	3.8	1		cytosolic part	0.021	3.8					1
general RNA polymerase II transcription factor activity	0.052	4.7	Magoh		nuclear speck	0.00044	4.4	1	0.095	2.5	1	0.072	4.1	1				0.0558133	3.66667	3		cytosolic ribosome	0.075	6.6					1
branching morphogenesis of a tube	0.054	2.6	Magoh		nucleic acid transport							0.05	4.8	1				0.05	4.8	1		demethylase activity					0.096	19.8	1
positive regulation of cellular biosynthetic process	0.054	1.5	Magoh		nucleobase, nucleoside and nucleotide biosynthetic process	0.0043	2.6	1	0.0023	2.7	1							0.0033	2.65	2		DNA damage checkpoint			0.056	4.6			1
cellular protein localization	0.056	1.7	Magoh		nucleobase, nucleoside, nucleotide and nucleic acid biosynthetic process	0.0043	2.6	1	0.0023	2.7	1							0.0033	2.65	2		DNA damage response, signal transduction			0.084	3			1
membrane organization	0.056	1.8	Magoh		nucleobase, nucleoside, nucleotide and nucleic acid transport							0.066	4.3	1				0.066	4.3	1		DNA integrity checkpoint			0.07	4.1			1
nitric-oxide synthase regulator activity	0.056	35.2	Magoh		nucleolus	3.9e-06	3.1	1	0.00072	2.4	1	0.0061	3	1				0.00227463	2.83333	3		DNA metabolic process			0.003	2			1
DNA damage checkpoint	0.056	4.6	Magoh		nucleoplasm	2.1e-05	2.2	1	0.00016	2	1	6.9e-05	2.9	1				8.33333e-05	2.36667	3		DNA repair			9e-05	2.9			1
negative regulation of binding	0.056	4.6	Magoh		nucleoplasm part	0.011	1.8	1	0.00067	2	1	0.0034	2.5	1				0.00502333	2.1	3		DNA-dependent ATPase activity			0.092	3.7			1
biopolymer methylation	0.056	2.9	Magoh		nucleoside binding	0.00013	1.6	1	9.2e-05	1.6	1	0.032	1.5	1				0.0107407	1.56667	3		dorsal/ventral axis specification					0.073	26.3	1
tissue homeostasis	0.057	3.4	Magoh		nucleoside metabolic process	0.019	3.8	1	0.08	3.1	1							0.0495	3.45	2		double-stranded DNA binding	0.065	4.3					1
positive regulation of nitrogen compound metabolic process	0.057	1.5	Magoh		nucleoside triphosphate biosynthetic process	0.0013	3.8	1	0.0065	3.2	1							0.0039	3.5	2		embryonic development ending in birth or egg hatching					0.043	2	1
regulation of oxygen and reactive oxygen species metabolic process	0.057	34.2	Magoh		nucleoside triphosphate metabolic process	0.0048	3.1	1	0.019	2.7	1							0.0119	2.9	2		embryonic hemopoiesis			0.033	10.3			1
cellular macromolecule localization	0.058	1.7	Magoh		nucleotide binding	2.8e-12	1.9	1	2.1e-10	1.8	1	8.9e-06	1.8	1				2.96674e-06	1.83333	3		embryonic hindlimb morphogenesis					0.031	10.8	1
positive regulation of biosynthetic process	0.059	1.5	Magoh		nucleotide biosynthetic process	0.0095	2.5	1	0.005	2.6	1							0.00725	2.55	2		embryonic morphogenesis					0.038	2.2	1
protein dimerization activity	0.06	1.7	Magoh		nucleotide-excision repair				0.035	5.5	1							0.035	5.5	1		ER overload response			0.021	12.8			1
positive regulation of epithelial cell proliferation	0.061	4.4	Magoh		one-carbon metabolic process	0.045	2.5	1										0.045	2.5	1		ER-nuclear signaling pathway			0.035	5.5			1
enzyme binding	0.061	1.8	Magoh		organelle envelope	0.0012	2	1	3.4e-06	2.4	1							0.0006017	2.2	2		ESC/E(Z) complex			0.078	24.7			1
positive regulation of transcription	0.064	1.5	Magoh		organelle fission	0.022	2.2	1	6.5e-05	3.1	1							0.0110325	2.65	2		establishment of RNA localization					0.05	4.8	1
small conjugating protein ligase activity	0.064	2.3	Magoh		organelle inner membrane	0.027	1.9	1	1.1e-06	3.1	1							0.0135006	2.5	2		ethanolamine and derivative metabolic process	0.088	6					1
transcription from RNA polymerase II promoter	0.065	2.8	Magoh		organelle lumen	3.9e-09	2.2	1	2.4e-07	2	1	2.6e-06	2.5	1				9.47967e-07	2.23333	3		eukaryotic translation elongation factor 1 complex	0.097	19.7					1
transcription activator activity	0.065	1.8	Magoh		organelle membrane	0.0024	1.7	1	0.0035	1.7	1							0.00295	1.7	2		exocrine system development					0.094	5.8	1
intracellular receptor-mediated signaling pathway	0.065	4.3	Magoh		organelle outer membrane	0.069	2.7	1										0.069	2.7	1		formation of primary germ layer					0.014	7.9	1
single-stranded DNA binding	0.066	4.3	Magoh		outer membrane	0.078	2.6	1										0.078	2.6	1		G1/S transition checkpoint			0.033	10.3			1
proton-transporting ATPase activity, rotational mechanism	0.066	7	Magoh		oxidative phosphorylation	0.07	3.2	1	0.0056	4.3	1							0.0378	3.75	2		gastrulation					0.014	5.3	1
response to light stimulus	0.067	2.4	Magoh		peptidyl-prolyl cis-trans isomerase activity				0.076	4	1							0.076	4	1		general RNA polymerase II transcription factor activity			0.052	4.7			1
morphogenesis of an epithelium	0.067	2	Magoh		perinuclear region of cytoplasm				0.013	2.4	1	0.016	3.4	1				0.0145	2.9	2		gland morphogenesis			0.098	2.4			1
protein kinase activity	0.068	1.5	Magoh		phosphatase binding	0.098	5.6	1	0.018	7	1							0.058	6.3	2		glial cell fate commitment					0.096	19.8	1
regulation of cellular response to stress	0.068	2.7	Magoh		phosphate metabolic process	0.061	1.4	1	0.02	1.5	1	0.025	1.7	1				0.0353333	1.53333	3		hemopoiesis					0.039	2.5	1
microtubule organizing center	0.069	2	Magoh		phosphatidylcholine metabolic process	0.042	9	1										0.042	9	1		hemopoietic or lymphoid organ development					0.065	2.2	1
spindle assembly	0.069	6.8	Magoh		phosphoprotein binding	0.081	6.3	1	0.091	5.9	1							0.086	6.1	2		hindlimb morphogenesis					0.068	7	1
mammary gland alveolus development	0.069	6.8	Magoh		phosphorus metabolic process	0.061	1.4	1	0.02	1.5	1	0.025	1.7	1				0.0353333	1.53333	3		histone demethylase activity					0.061	31.6	1
neuroblast proliferation	0.069	6.8	Magoh		phosphorylation	0.045	1.4	1	0.0065	1.6	1	0.037	1.8	1				0.0295	1.6	3		histone methylation			0.035	5.5			1
RNA polymerase II transcription factor activity	0.069	2.4	Magoh		pigment granule	0.064	2.8	1	0.027	3.1	1							0.0455	2.95	2		Hsp90 protein binding			0.083	23.5			1
macromolecular complex assembly	0.07	1.6	Magoh		poly(A) RNA binding	0.028	11.3	1										0.028	11.3	1		hydrogen ion transmembrane transporter activity			0.0022	3.9			1
DNA integrity checkpoint	0.07	4.1	Magoh		poly-purine tract binding	0.033	10.2	1										0.033	10.2	1		hydrogen ion transporting ATP synthase activity, rotational mechanism			0.037	9.6			1
ribonucleoprotein binding	0.071	4.1	Magoh		pore complex	0.037	3.2	1										0.037	3.2	1		identical protein binding			0.0015	2.3			1
nuclear hormone receptor binding	0.071	4.1	Magoh		positive regulation of biosynthetic process	0.098	1.4	1	0.059	1.5	1	0.093	1.7	1				0.0833333	1.53333	3		immune system development					0.079	2.1	1
macromolecular complex subunit organization	0.072	1.6	Magoh		positive regulation of cell differentiation							0.0067	3.6	1				0.0067	3.6	1		in utero embryonic development			0.092	1.7			1
blastocyst development	0.072	3.2	Magoh		positive regulation of cell proliferation	0.028	1.9	1										0.028	1.9	1		inorganic cation transmembrane transporter activity			0.028	2.5			1
morphogenesis of a branching structure	0.073	2.2	Magoh		positive regulation of cellular biosynthetic process	0.092	1.4	1	0.054	1.5	1	0.089	1.7	1				0.0783333	1.53333	3		intracellular receptor-mediated signaling pathway			0.065	4.3			1
sensory organ development	0.074	1.7	Magoh		positive regulation of developmental process							0.019	3	1				0.019	3	1		ion transmembrane transport			0.0072	4.9			1
spindle microtubule	0.075	6.5	Magoh		positive regulation of epithelial cell differentiation							0.085	22.6	1				0.085	22.6	1		iron-sulfur cluster assembly	0.03	10.8					1
proton-transporting two-sector ATPase complex, catalytic domain	0.075	6.5	Magoh		positive regulation of epithelial cell proliferation				0.061	4.4	1							0.061	4.4	1		large ribosomal subunit	0.075	4					1
peptidyl-prolyl cis-trans isomerase activity	0.076	4	Magoh		positive regulation of gene expression				0.079	1.5	1	0.089	1.8	1				0.084	1.65	2		lateral plasma membrane			0.028	11.1			1
vacuole organization	0.076	4	Magoh		positive regulation of macromolecule biosynthetic process				0.096	1.4	1	0.071	1.8	1				0.0835	1.6	2		ligase activity, forming aminoacyl-tRNA and related compounds			0.046	3.7			1
protein stabilization	0.078	6.4	Magoh		positive regulation of myeloid cell differentiation							0.039	9.5	1				0.039	9.5	1		ligase activity, forming carbon-nitrogen bonds			0.048	2			1
ESC/E(Z) complex	0.078	24.7	Magoh		positive regulation of nitrogen compound metabolic process				0.057	1.5	1							0.057	1.5	1		ligase activity, forming carbon-oxygen bonds			0.046	3.7			1
positive regulation of gene expression	0.079	1.5	Magoh		positive regulation of osteoblast differentiation							0.013	16.9	1				0.013	16.9	1		lysosome organization			0.025	6.2			1
nucleoside metabolic process	0.08	3.1	Magoh		positive regulation of transcription				0.064	1.5	1	0.077	1.8	1				0.0705	1.65	2		macromolecular complex subunit organization			0.072	1.6			1
methylation	0.08	2.6	Magoh		posttranscriptional regulation of gene expression				2.7e-05	3.7	1	0.039	3.2	1				0.0195135	3.45	2		macromolecule catabolic process			0.0053	1.7			1
regulation of nucleocytoplasmic transport	0.081	3.9	Magoh		profilin binding							0.0023	39.5	1				0.0023	39.5	1		mammary gland alveolus development			0.069	6.8			1
ribosome binding	0.082	6.2	Magoh		pronucleus	0.075	6.6	1	0.012	8.2	1							0.0435	7.4	2		mammary gland development			0.039	2.8			1
TPR domain binding	0.083	23.5	Magoh		proteasome complex	0.059	3.4	1	0.019	3.8	1							0.039	3.6	2		mammary gland duct morphogenesis			0.0064	6.6			1
Hsp90 protein binding	0.083	23.5	Magoh		protein amino acid alkylation	0.031	4.2	1	0.0079	4.8	1							0.01945	4.5	2		mammary gland morphogenesis			0.015	5.2			1
proton-transporting V-type ATPase complex	0.083	6.2	Magoh		protein amino acid methylation	0.031	4.2	1	0.0079	4.8	1							0.01945	4.5	2		mediator complex			0.023	12.4			1
DNA damage response, signal transduction	0.084	3	Magoh		protein amino acid phosphorylation							0.031	1.9	1				0.031	1.9	1		membrane-bounded vesicle	0.068	1.6					1
cis-trans isomerase activity	0.086	3.8	Magoh		protein catabolic process	0.062	1.5	1	0.0035	1.8	1							0.03275	1.65	2		mesoderm formation					0.075	6.6	1
nuclear import	0.088	3	Magoh		protein dimerization activity				0.06	1.7	1							0.06	1.7	1		mesoderm morphogenesis					0.082	6.2	1
lamellipodium	0.089	2.9	Magoh		protein domain specific binding				0.095	1.8	1							0.095	1.8	1		metallo-sulfur cluster assembly	0.03	10.8					1
phosphoprotein binding	0.091	5.9	Magoh		protein folding	0.025	2.5	1	0.004	3	1	0.076	3.1	1				0.035	2.86667	3		microtubule			0.029	2			1
regulation of transcription from RNA polymerase II promoter	0.091	1.4	Magoh		protein homodimerization activity				0.098	1.8	1							0.098	1.8	1		microtubule binding			0.029	3.5			1
negative regulation of molecular function	0.091	2.1	Magoh		protein kinase activity	0.097	1.4	1	0.068	1.5	1							0.0825	1.45	2		microtubule-based transport	0.013	8					1
in utero embryonic development	0.092	1.7	Magoh		protein methyltransferase activity	0.0066	5	1	3.3e-05	7	1							0.0033165	6	2		mitochondrial membrane part	0.035	4					1
protein serine/threonine kinase activity	0.092	1.5	Magoh		protein modification by small protein conjugation				0.0021	3.9	1							0.0021	3.9	1		mitochondrial outer membrane	0.052	3					1
DNA-dependent ATPase activity	0.092	3.7	Magoh		protein modification by small protein conjugation or removal				0.0009	3.6	1							0.0009	3.6	1		mitotic cell cycle checkpoint			0.032	5.7			1
cytoplasmic membrane-bounded vesicle	0.093	1.5	Magoh		protein phosphatase binding	0.074	6.6	1	0.011	8.3	1							0.0425	7.45	2		modification-dependent macromolecule catabolic process			0.0039	1.8			1
response to extracellular stimulus	0.094	2.1	Magoh		protein polyubiquitination	0.08	6.3	1	0.0013	10.1	1							0.04065	8.2	2		modification-dependent protein catabolic process			0.0039	1.8			1
nuclear speck	0.095	2.5	Magoh		protein serine/threonine kinase activity	0.018	1.8	1	0.092	1.5	1	0.04	2.1	1				0.05	1.8	3		monovalent inorganic cation transmembrane transporter activity			0.0032	3.6			1
centrosome organization	0.095	5.7	Magoh		protein stabilization				0.078	6.4	1							0.078	6.4	1		morphogenesis of a branching structure			0.073	2.2			1
protein domain specific binding	0.095	1.8	Magoh		protein targeting				0.041	2.3	1							0.041	2.3	1		mRNA binding	0.003	4.9					1
positive regulation of macromolecule biosynthetic process	0.096	1.4	Magoh		protein transporter activity	0.098	2.8	1										0.098	2.8	1		mRNA splice site selection	0.015	15.4					1
cytoskeleton organization	0.096	1.6	Magoh		protein ubiquitination				0.003	4.1	1							0.003	4.1	1		ncRNA metabolic process	0.0043	2.5					1
hormone receptor binding	0.097	3.6	Magoh		protein-lysine N-methyltransferase activity	0.031	5.8	1	0.036	5.4	1							0.0335	5.6	2		ncRNA processing	0.033	2.3					1
protein homodimerization activity	0.098	1.8	Magoh		proteolysis involved in cellular protein catabolic process				0.0074	1.7	1							0.0074	1.7	1		negative regulation of binding			0.056	4.6			1
gland morphogenesis	0.098	2.4	Magoh		proton transport	0.056	3.4	1	0.0039	4.6	1							0.02995	4	2		negative regulation of biosynthetic process					0.048	2	1
mRNA metabolic process	2.9e-11	6	Rbm8a		proton-transporting ATP synthase complex	0.082	6.2	1	0.0014	9.8	1							0.0417	8	2		negative regulation of cellular biosynthetic process					0.045	2	1
RNA binding	5.3e-11	3.9	Rbm8a		proton-transporting ATP synthase complex, coupling factor F(o)	0.041	9.1	1	0.046	8.6	1							0.0435	8.85	2		negative regulation of DNA binding			0.039	5.3			1
RNA splicing	7.1e-11	7.5	Rbm8a		proton-transporting ATPase activity, rotational mechanism				0.066	7	1							0.066	7	1		negative regulation of epithelial cell proliferation			0.043	5.1			1
mRNA processing	1.1e-10	6.3	Rbm8a		proton-transporting two-sector ATPase complex	0.021	4.7	1	0.00083	6.2	1							0.010915	5.45	2		negative regulation of gene expression					0.035	2.1	1
RNA processing	1.4e-07	4	Rbm8a		proton-transporting two-sector ATPase complex, catalytic domain				0.075	6.5	1							0.075	6.5	1		negative regulation of macromolecule biosynthetic process					0.039	2.1	1
nuclear lumen	5.7e-07	2.9	Rbm8a		proton-transporting two-sector ATPase complex, proton-transporting domain	0.002	9	1	0.02	6.7	1							0.011	7.85	2		negative regulation of molecular function			0.091	2.1			1
intracellular organelle lumen	2.5e-06	2.5	Rbm8a		proton-transporting V-type ATPase complex				0.083	6.2	1							0.083	6.2	1		negative regulation of nitrogen compound metabolic process					0.03	2.2	1
organelle lumen	2.6e-06	2.5	Rbm8a		purine NTP-dependent helicase activity	0.079	2.6	1	0.00015	4.5	1	0.023	4.6	1				0.03405	3.9	3		negative regulation of nucleobase, nucleoside, nucleotide and nucleic acid metabolic process					0.029	2.2	1
membrane-enclosed lumen	5.1e-06	2.4	Rbm8a		purine nucleoside binding	0.00011	1.6	1	7.7e-05	1.6	1	0.03	1.5	1				0.0100623	1.56667	3		negative regulation of retinoic acid receptor signaling pathway	0.055	35.9					1
nucleotide binding	8.9e-06	1.8	Rbm8a		purine nucleoside metabolic process	0.028	6	1	0.032	5.7	1							0.03	5.85	2		negative regulation of RNA metabolic process					0.017	2.5	1
ribonucleoprotein complex	3.4e-05	3.4	Rbm8a		purine nucleoside triphosphate biosynthetic process	0.0012	3.8	1	0.0061	3.3	1							0.00365	3.55	2		negative regulation of transcription					0.019	2.3	1
nucleoplasm	6.9e-05	2.9	Rbm8a		purine nucleoside triphosphate metabolic process	0.0028	3.4	1	0.012	2.9	1							0.0074	3.15	2		negative regulation of transcription factor activity			0.025	6.2			1
chromosome organization	0.00018	3.1	Rbm8a		purine nucleotide binding	0.00023	1.5	1	0.00022	1.5	1	0.063	1.4	1				0.02115	1.46667	3		negative regulation of transcription, DNA-dependent					0.016	2.6	1
non-membrane-bounded organelle	0.00018	1.8	Rbm8a		purine nucleotide biosynthetic process	0.0015	3.1	1	0.0022	3	1							0.00185	3.05	2		neuron maturation	0.049	8.3					1
intracellular non-membrane-bounded organelle	0.00018	1.8	Rbm8a		purine nucleotide metabolic process	0.0051	2.7	1	0.0072	2.6	1							0.00615	2.65	2		NF-kappaB binding			0.026	6.1			1
spliceosome	0.00037	6	Rbm8a		purine ribonucleoside metabolic process	0.028	6	1	0.032	5.7	1							0.03	5.85	2		nitric-oxide synthase regulator activity			0.056	35.2			1
lamellipodium	0.00056	8.8	Rbm8a		purine ribonucleoside triphosphate biosynthetic process	0.0011	3.9	1	0.0057	3.3	1							0.0034	3.6	2		nuclear body	0.00025	3.6					1
chromatin binding	0.00076	4.6	Rbm8a		purine ribonucleoside triphosphate metabolic process	0.002	3.5	1	0.0093	3	1							0.00565	3.25	2		nuclear import			0.088	3			1
DNA binding	0.0012	1.7	Rbm8a		purine ribonucleotide binding	0.00011	1.5	1	0.0001	1.5	1	0.061	1.4	1				0.0204033	1.46667	3		nuclear matrix			0.026	4.4			1
cell leading edge	0.0013	5.8	Rbm8a		purine ribonucleotide biosynthetic process	0.00079	3.7	1	0.0011	3.5	1							0.000945	3.6	2		nuclear mRNA splicing, via spliceosome	0.0005	6.8					1
chromocenter	0.0017	46.3	Rbm8a		purine ribonucleotide metabolic process	0.0018	3.3	1	0.0025	3.2	1							0.00215	3.25	2		nuclear periphery			0.042	3.8			1
ATPase activity, coupled	0.002	3.5	Rbm8a		regulation of binding				0.016	3	1							0.016	3	1		nucleic acid transport					0.05	4.8	1
chromatin organization	0.0021	3	Rbm8a		regulation of cell cycle	0.076	1.8	1	0.023	2.1	1							0.0495	1.95	2		nucleobase, nucleoside, nucleotide and nucleic acid transport					0.066	4.3	1
profilin binding	0.0023	39.5	Rbm8a		regulation of cell proliferation	0.074	1.5	1										0.074	1.5	1		nucleotide-excision repair			0.035	5.5			1
nucleoplasm part	0.0034	2.5	Rbm8a		regulation of cellular protein metabolic process				0.035	1.8	1	0.064	2.3	1				0.0495	2.05	2		one-carbon metabolic process	0.045	2.5					1
cytoskeletal protein binding	0.0061	2.5	Rbm8a		regulation of cellular response to stress				0.068	2.7	1							0.068	2.7	1		organelle outer membrane	0.069	2.7					1
nucleolus	0.0061	3	Rbm8a		regulation of DNA binding				0.021	3.2	1							0.021	3.2	1		outer membrane	0.078	2.6					1
positive regulation of cell differentiation	0.0067	3.6	Rbm8a		regulation of epithelial cell proliferation				0.0023	4.3	1							0.0023	4.3	1		peptidyl-prolyl cis-trans isomerase activity			0.076	4			1
translation	0.0072	2.7	Rbm8a		regulation of epithelial cell proliferation involved in prostate gland development				0.033	10.3	1							0.033	10.3	1		phosphatidylcholine metabolic process	0.042	9					1
single-stranded DNA binding	0.0081	9.6	Rbm8a		regulation of kinase activity							0.095	2.5	1				0.095	2.5	1		poly(A) RNA binding	0.028	11.3					1
enzyme binding	0.0084	3.1	Rbm8a		regulation of myeloid cell differentiation							0.026	6.2	1				0.026	6.2	1		poly-purine tract binding	0.033	10.2					1
ATPase activity	0.0091	2.8	Rbm8a		regulation of myeloid leukocyte differentiation							0.051	8.2	1				0.051	8.2	1		pore complex	0.037	3.2					1
tissue morphogenesis	0.011	3	Rbm8a		regulation of nucleocytoplasmic transport				0.081	3.9	1							0.081	3.9	1		positive regulation of cell differentiation					0.0067	3.6	1
positive regulation of osteoblast differentiation	0.013	16.9	Rbm8a		regulation of osteoblast differentiation							0.042	9.1	1				0.042	9.1	1		positive regulation of cell proliferation	0.028	1.9					1
formation of primary germ layer	0.014	7.9	Rbm8a		regulation of oxygen and reactive oxygen species metabolic process	0.055	35.9	1	0.057	34.2	1							0.056	35.05	2		positive regulation of developmental process					0.019	3	1
gastrulation	0.014	5.3	Rbm8a		regulation of protein kinase activity							0.086	2.5	1				0.086	2.5	1		positive regulation of epithelial cell differentiation					0.085	22.6	1
structure-specific DNA binding	0.015	5.2	Rbm8a		regulation of protein stability				0.035	5.5	1							0.035	5.5	1		positive regulation of epithelial cell proliferation			0.061	4.4			1
negative regulation of transcription, DNA-dependent	0.016	2.6	Rbm8a		regulation of retinoic acid receptor signaling pathway	0.081	23.9	1										0.081	23.9	1		positive regulation of myeloid cell differentiation					0.039	9.5	1
perinuclear region of cytoplasm	0.016	3.4	Rbm8a		regulation of transcription	0.054	1.2	1	0.0029	1.3	1	0.028	1.4	1				0.0283	1.3	3		positive regulation of nitrogen compound metabolic process			0.057	1.5			1
negative regulation of RNA metabolic process	0.017	2.5	Rbm8a		regulation of transcription factor activity				0.028	3.5	1							0.028	3.5	1		positive regulation of osteoblast differentiation					0.013	16.9	1
heterochromatin	0.017	7.3	Rbm8a		regulation of transcription from RNA polymerase II promoter				0.091	1.4	1							0.091	1.4	1		profilin binding					0.0023	39.5	1
positive regulation of developmental process	0.019	3	Rbm8a		regulation of translation				0.0088	3.1	1	0.037	4	1				0.0229	3.55	2		protein amino acid phosphorylation					0.031	1.9	1
negative regulation of transcription	0.019	2.3	Rbm8a		reproductive cellular process	0.053	2.1	1										0.053	2.1	1		protein dimerization activity			0.06	1.7			1
nuclear chromatin	0.021	6.7	Rbm8a		respiratory chain	0.082	3	1	0.0079	4	1							0.04495	3.5	2		protein domain specific binding			0.095	1.8			1
transcription	0.021	1.5	Rbm8a		response to DNA damage stimulus				0.00029	2.5	1							0.00029	2.5	1		protein homodimerization activity			0.098	1.8			1
ATP binding	0.022	1.5	Rbm8a		response to endoplasmic reticulum stress				0.039	5.3	1							0.039	5.3	1		protein modification by small protein conjugation			0.0021	3.9			1
actin cytoskeleton	0.023	3.2	Rbm8a		response to extracellular stimulus				0.094	2.1	1							0.094	2.1	1		protein modification by small protein conjugation or removal			0.0009	3.6			1
ATP-dependent helicase activity	0.023	4.6	Rbm8a		response to light stimulus				0.067	2.4	1							0.067	2.4	1		protein stabilization			0.078	6.4			1
purine NTP-dependent helicase activity	0.023	4.6	Rbm8a		response to protein stimulus				0.0038	3.5	1							0.0038	3.5	1		protein targeting			0.041	2.3			1
helicase activity	0.023	3.7	Rbm8a		response to radiation	0.046	2.3	1										0.046	2.3	1		protein transporter activity	0.098	2.8					1
Wnt receptor signaling pathway	0.024	3.6	Rbm8a		response to unfolded protein				0.02	3.8	1							0.02	3.8	1		protein ubiquitination			0.003	4.1			1
phosphate metabolic process	0.025	1.7	Rbm8a		response to UV				0.0032	5.9	1							0.0032	5.9	1		proteolysis involved in cellular protein catabolic process			0.0074	1.7			1
phosphorus metabolic process	0.025	1.7	Rbm8a		ribonucleoprotein binding	0.061	4.4	1	0.071	4.1	1							0.066	4.25	2		proton-transporting ATPase activity, rotational mechanism			0.066	7			1
adenyl ribonucleotide binding	0.026	1.5	Rbm8a		ribonucleoprotein complex	2.1e-14	3.8	1	9.5e-08	2.8	1	3.4e-05	3.4	1				1.1365e-05	3.33333	3		proton-transporting two-sector ATPase complex, catalytic domain			0.075	6.5			1
regulation of myeloid cell differentiation	0.026	6.2	Rbm8a		ribonucleoprotein complex assembly	0.068	4.2	1										0.068	4.2	1		proton-transporting V-type ATPase complex			0.083	6.2			1
adenyl nucleotide binding	0.027	1.5	Rbm8a		ribonucleoprotein complex biogenesis	0.00044	3.4	1										0.00044	3.4	1		regulation of binding			0.016	3			1
regulation of transcription	0.028	1.4	Rbm8a		ribonucleoside metabolic process	0.0043	5.5	1	0.026	4.4	1							0.01515	4.95	2		regulation of cell proliferation	0.074	1.5					1
negative regulation of nucleobase, nucleoside, nucleotide and nucleic acid metabolic process	0.029	2.2	Rbm8a		ribonucleoside triphosphate biosynthetic process	0.0011	3.9	1	0.0057	3.3	1							0.0034	3.6	2		regulation of cellular response to stress			0.068	2.7			1
AP-type membrane coat adaptor complex	0.029	11.1	Rbm8a		ribonucleoside triphosphate metabolic process	0.0021	3.5	1	0.0098	3	1							0.00595	3.25	2		regulation of DNA binding			0.021	3.2			1
clathrin adaptor complex	0.029	11.1	Rbm8a		ribonucleotide binding	0.00011	1.5	1	0.0001	1.5	1	0.061	1.4	1				0.0204033	1.46667	3		regulation of epithelial cell proliferation			0.0023	4.3			1
actin binding	0.029	2.5	Rbm8a		ribonucleotide biosynthetic process	0.001	3.6	1	0.0015	3.4	1							0.00125	3.5	2		regulation of epithelial cell proliferation involved in prostate gland development			0.033	10.3			1
chromatin modification	0.03	2.7	Rbm8a		ribonucleotide metabolic process	0.00073	3.4	1	0.0011	3.3	1							0.000915	3.35	2		regulation of kinase activity					0.095	2.5	1
purine nucleoside binding	0.03	1.5	Rbm8a		ribosomal subunit	0.0063	4.2	1										0.0063	4.2	1		regulation of myeloid cell differentiation					0.026	6.2	1
negative regulation of nitrogen compound metabolic process	0.03	2.2	Rbm8a		ribosome	0.00011	3.3	1	0.00021	3.1	1	0.056	2.9	1				0.0187733	3.1	3		regulation of myeloid leukocyte differentiation					0.051	8.2	1
chromosome condensation	0.031	10.8	Rbm8a		ribosome binding				0.082	6.2	1							0.082	6.2	1		regulation of nucleocytoplasmic transport			0.081	3.9			1
embryonic hindlimb morphogenesis	0.031	10.8	Rbm8a		ribosome biogenesis	0.004	3.2	1										0.004	3.2	1		regulation of osteoblast differentiation					0.042	9.1	1
Golgi apparatus	0.031	1.9	Rbm8a		RNA binding	2.6e-22	3.9	1	9.3e-10	2.6	1	5.3e-11	3.9	1				3.27667e-10	3.46667	3		regulation of protein kinase activity					0.086	2.5	1
protein amino acid phosphorylation	0.031	1.9	Rbm8a		RNA biosynthetic process				0.011	2.7	1							0.011	2.7	1		regulation of protein stability			0.035	5.5			1
nucleoside binding	0.032	1.5	Rbm8a		RNA localization							0.052	4.7	1				0.052	4.7	1		regulation of retinoic acid receptor signaling pathway	0.081	23.9					1
chromatin	0.032	3.4	Rbm8a		RNA methyltransferase activity	0.015	7.5	1										0.015	7.5	1		regulation of transcription factor activity			0.028	3.5			1
negative regulation of gene expression	0.035	2.1	Rbm8a		RNA modification	0.029	4.3	1										0.029	4.3	1		regulation of transcription from RNA polymerase II promoter			0.091	1.4			1
Golgi apparatus part	0.035	2.9	Rbm8a		RNA polymerase II transcription factor activity				0.069	2.4	1							0.069	2.4	1		reproductive cellular process	0.053	2.1					1
S phase of mitotic cell cycle	0.037	52.7	Rbm8a		RNA polymerase II transcription mediator activity				0.023	6.4	1							0.023	6.4	1		response to DNA damage stimulus			0.00029	2.5			1
S phase	0.037	52.7	Rbm8a		RNA processing	5.2e-15	3.9	1	0.00046	2.1	1	1.4e-07	4	1				0.00015338	3.33333	3		response to endoplasmic reticulum stress			0.039	5.3			1
phosphorylation	0.037	1.8	Rbm8a		RNA splicing	6.4e-15	5.7	1	1.7e-06	3.6	1	7.1e-11	7.5	1				5.6669e-07	5.6	3		response to extracellular stimulus			0.094	2.1			1
regulation of translation	0.037	4	Rbm8a		RNA splicing, via transesterification reactions	0.0005	6.8	1										0.0005	6.8	1		response to light stimulus			0.067	2.4			1
embryonic morphogenesis	0.038	2.2	Rbm8a		RNA splicing, via transesterification reactions with bulged adenosine as nucleophile	0.0005	6.8	1										0.0005	6.8	1		response to protein stimulus			0.0038	3.5			1
DNA packaging	0.039	3.9	Rbm8a		RNA transport							0.05	4.8	1				0.05	4.8	1		response to radiation	0.046	2.3					1
negative regulation of macromolecule biosynthetic process	0.039	2.1	Rbm8a		rRNA metabolic process	0.058	2.9	1										0.058	2.9	1		response to unfolded protein			0.02	3.8			1
positive regulation of myeloid cell differentiation	0.039	9.5	Rbm8a		rRNA processing	0.055	2.9	1										0.055	2.9	1		response to UV			0.0032	5.9			1
posttranscriptional regulation of gene expression	0.039	3.2	Rbm8a		ruffle							0.09	5.9	1				0.09	5.9	1		ribonucleoprotein complex assembly	0.068	4.2					1
hemopoiesis	0.039	2.5	Rbm8a		S phase							0.037	52.7	1				0.037	52.7	1		ribonucleoprotein complex biogenesis	0.00044	3.4					1
protein serine/threonine kinase activity	0.04	2.1	Rbm8a		S phase of mitotic cell cycle							0.037	52.7	1				0.037	52.7	1		ribosomal subunit	0.0063	4.2					1
chordate embryonic development	0.04	2.1	Rbm8a		sensory organ development				0.074	1.7	1							0.074	1.7	1		ribosome binding			0.082	6.2			1
regulation of osteoblast differentiation	0.042	9.1	Rbm8a		sex chromatin	0.015	7.5	1										0.015	7.5	1		ribosome biogenesis	0.004	3.2					1
embryonic development ending in birth or egg hatching	0.043	2	Rbm8a		sex chromosome	0.017	7.2	1										0.017	7.2	1		RNA biosynthetic process			0.011	2.7			1
cell projection	0.045	1.9	Rbm8a		single-stranded DNA binding	0.056	4.5	1	0.066	4.3	1	0.0081	9.6	1				0.0433667	6.13333	3		RNA localization					0.052	4.7	1
negative regulation of cellular biosynthetic process	0.045	2	Rbm8a		single-stranded RNA binding	0.02	6.8	1										0.02	6.8	1		RNA methyltransferase activity	0.015	7.5					1
intracellular transport	0.046	2	Rbm8a		small conjugating protein ligase activity				0.064	2.3	1							0.064	2.3	1		RNA modification	0.029	4.3					1
cell cortex	0.046	3.7	Rbm8a		spindle	0.058	2.5	1	0.00016	4.1	1							0.02908	3.3	2		RNA polymerase II transcription factor activity			0.069	2.4			1
negative regulation of biosynthetic process	0.048	2	Rbm8a		spindle assembly				0.069	6.8	1							0.069	6.8	1		RNA polymerase II transcription mediator activity			0.023	6.4			1
chromatin assembly or disassembly	0.049	3.6	Rbm8a		spindle microtubule				0.075	6.5	1							0.075	6.5	1		RNA splicing, via transesterification reactions	0.0005	6.8					1
tube development	0.05	2.4	Rbm8a		spliceosome	2e-09	6	1	0.00013	3.9	1	0.00037	6	1				0.000166667	5.3	3		RNA splicing, via transesterification reactions with bulged adenosine as nucleophile	0.0005	6.8					1
transcription repressor activity	0.05	2.6	Rbm8a		spliceosome assembly	0.064	7.2	1										0.064	7.2	1		RNA transport					0.05	4.8	1
RNA transport	0.05	4.8	Rbm8a		Srb-mediator complex				0.0063	6.6	1							0.0063	6.6	1		rRNA metabolic process	0.058	2.9					1
establishment of RNA localization	0.05	4.8	Rbm8a		structural constituent of ribosome	0.00019	3.5	1	0.00036	3.3	1							0.000275	3.4	2		rRNA processing	0.055	2.9					1
nucleic acid transport	0.05	4.8	Rbm8a		structure-specific DNA binding	0.004	4	1				0.015	5.2	1				0.0095	4.6	2		ruffle					0.09	5.9	1
clathrin coat	0.051	8.2	Rbm8a		synapse organization	0.047	3.7	1										0.047	3.7	1		S phase					0.037	52.7	1
regulation of myeloid leukocyte differentiation	0.051	8.2	Rbm8a		synaptogenesis	0.0091	9	1										0.0091	9	1		S phase of mitotic cell cycle					0.037	52.7	1
RNA localization	0.052	4.7	Rbm8a		T cell differentiation in the thymus							0.061	7.4	1				0.061	7.4	1		sensory organ development			0.074	1.7			1
nuclear heterochromatin	0.054	7.9	Rbm8a		tissue homeostasis				0.057	3.4	1							0.057	3.4	1		sex chromatin	0.015	7.5					1
cyclin-dependent protein kinase activity	0.054	7.9	Rbm8a		tissue morphogenesis							0.011	3	1				0.011	3	1		sex chromosome	0.017	7.2					1
ribosome	0.056	2.9	Rbm8a		TPR domain binding				0.083	23.5	1							0.083	23.5	1		single-stranded RNA binding	0.02	6.8					1
T cell differentiation in the thymus	0.061	7.4	Rbm8a		transcription	0.023	1.3	1	0.0045	1.4	1	0.021	1.5	1				0.0161667	1.4	3		small conjugating protein ligase activity			0.064	2.3			1
purine ribonucleotide binding	0.061	1.4	Rbm8a		transcription activator activity	0.085	1.7	1	0.065	1.8	1							0.075	1.75	2		spindle assembly			0.069	6.8			1
ribonucleotide binding	0.061	1.4	Rbm8a		transcription coactivator activity	0.0051	3.4	1	0.0021	3.5	1							0.0036	3.45	2		spindle microtubule			0.075	6.5			1
histone demethylase activity	0.061	31.6	Rbm8a		transcription cofactor activity	0.0087	2.5	1	0.0018	2.7	1							0.00525	2.6	2		spliceosome assembly	0.064	7.2					1
purine nucleotide binding	0.063	1.4	Rbm8a		transcription factor binding	0.01	2.1	1	0.00056	2.4	1							0.00528	2.25	2		Srb-mediator complex			0.0063	6.6			1
regulation of cellular protein metabolic process	0.064	2.3	Rbm8a		transcription from RNA polymerase II promoter				0.065	2.8	1							0.065	2.8	1		synapse organization	0.047	3.7					1
hemopoietic or lymphoid organ development	0.065	2.2	Rbm8a		transcription repressor activity							0.05	2.6	1				0.05	2.6	1		synaptogenesis	0.0091	9					1
tube morphogenesis	0.065	2.8	Rbm8a		transcription, DNA-dependent				0.0094	2.8	1							0.0094	2.8	1		T cell differentiation in the thymus					0.061	7.4	1
nucleobase, nucleoside, nucleotide and nucleic acid transport	0.066	4.3	Rbm8a		trans-Golgi network							0.09	5.9	1				0.09	5.9	1		tissue homeostasis			0.057	3.4			1
morphogenesis of an epithelium	0.068	2.7	Rbm8a		translation	7.8e-08	3.3	1	4.1e-09	3.4	1	0.0072	2.7	1				0.00240003	3.13333	3		tissue morphogenesis					0.011	3	1
hindlimb morphogenesis	0.068	7	Rbm8a		translation elongation factor activity	0.0012	7.3	1	0.011	5.7	1							0.0061	6.5	2		TPR domain binding			0.083	23.5			1
positive regulation of macromolecule biosynthetic process	0.071	1.8	Rbm8a		translation factor activity, nucleic acid binding	0.00027	4.2	1	9.9e-05	4.3	1							0.0001845	4.25	2		transcription from RNA polymerase II promoter			0.065	2.8			1
nuclear speck	0.072	4.1	Rbm8a		translation initiation factor activity	0.082	3	1	0.008	4	1							0.045	3.5	2		transcription repressor activity					0.05	2.6	1
centromeric heterochromatin	0.073	26.5	Rbm8a		tRNA aminoacylation				0.044	3.7	1							0.044	3.7	1		transcription, DNA-dependent			0.0094	2.8			1
dorsal/ventral axis specification	0.073	26.3	Rbm8a		tRNA aminoacylation for protein translation				0.044	3.7	1							0.044	3.7	1		trans-Golgi network					0.09	5.9	1
mesoderm formation	0.075	6.6	Rbm8a		tRNA metabolic process	0.095	2.2	1	0.047	2.4	1							0.071	2.3	2		tRNA aminoacylation			0.044	3.7			1
protein folding	0.076	3.1	Rbm8a		tube development							0.05	2.4	1				0.05	2.4	1		tRNA aminoacylation for protein translation			0.044	3.7			1
positive regulation of transcription	0.077	1.8	Rbm8a		tube morphogenesis							0.065	2.8	1				0.065	2.8	1		tube development					0.05	2.4	1
circadian rhythm	0.079	6.4	Rbm8a		tubulin binding				0.0056	3.7	1							0.0056	3.7	1		tube morphogenesis					0.065	2.8	1
immune system development	0.079	2.1	Rbm8a		ubiquitin ligase complex				0.0053	4.3	1							0.0053	4.3	1		tubulin binding			0.0056	3.7			1
mesoderm morphogenesis	0.082	6.2	Rbm8a		ubiquitin-dependent protein catabolic process				0.022	2.4	1							0.022	2.4	1		ubiquitin ligase complex			0.0053	4.3			1
cellular protein localization	0.084	2.1	Rbm8a		ubiquitin-ubiquitin ligase activity				0.00042	23.5	1							0.00042	23.5	1		ubiquitin-dependent protein catabolic process			0.022	2.4			1
cell cycle	0.085	1.7	Rbm8a		unfolded protein binding	0.038	3.2	1	0.048	3	1							0.043	3.1	2		ubiquitin-ubiquitin ligase activity			0.00042	23.5			1
positive regulation of epithelial cell differentiation	0.085	22.6	Rbm8a		vacuole				0.022	2.2	1							0.022	2.2	1		vacuole			0.022	2.2			1
regulation of protein kinase activity	0.086	2.5	Rbm8a		vacuole organization				0.076	4	1							0.076	4	1		vacuole organization			0.076	4			1
cellular macromolecule localization	0.086	2.1	Rbm8a		vesicle transport along microtubule	0.015	15.4	1										0.015	15.4	1		vesicle transport along microtubule	0.015	15.4					1
positive regulation of gene expression	0.089	1.8	Rbm8a		Wnt receptor signaling pathway				0.036	2.4	1	0.024	3.6	1				0.03	3	2
positive regulation of cellular biosynthetic process	0.089	1.7	Rbm8a		(blank)
trans-Golgi network	0.09	5.9	Rbm8a		Grand Total	0.0305152	4.33165	218	0.0286201	4.07872	296	0.038589	6.02979	141				0.0313968	4.5829	655
ruffle	0.09	5.9	Rbm8a
positive regulation of biosynthetic process	0.093	1.7	Rbm8a
exocrine system development	0.094	5.8	Rbm8a
regulation of kinase activity	0.095	2.5	Rbm8a
cytoplasmic vesicle	0.095	1.8	Rbm8a
cell morphogenesis	0.096	2	Rbm8a
demethylase activity	0.096	19.8	Rbm8a																			Row Labels	Eif4a3	Rbm8a	Magoh	Eif4a3	Rbm8a	Magoh	avg fold
glial cell fate commitment	0.096	19.8	Rbm8a																			transcription	1.3	1.5	1.4	0.023	0.021	0.0045	1.4
nuclear chromosome part	0.099	3.6	Rbm8a																			adenyl nucleotide binding	1.6	1.5	1.6	8.5e-05	0.027	5.8e-05	1.56667
RNA binding	2.6e-22	3.9	Eif4a3																			DNA binding	1.5	1.7	1.5	0.0011	0.0012	0.00022	1.56667
mRNA metabolic process	8.1e-16	4.7	Eif4a3																			nucleoside binding	1.6	1.5	1.6	0.00013	0.032	9.2e-05	1.56667
mRNA processing	1.6e-15	5.1	Eif4a3																			purine nucleoside binding	1.6	1.5	1.6	0.00011	0.03	7.7e-05	1.56667
RNA processing	5.2e-15	3.9	Eif4a3																			phosphorylation	1.4	1.8	1.6	0.045	0.037	0.0065	1.6
RNA splicing	6.4e-15	5.7	Eif4a3																			adenyl ribonucleotide binding	1.7	1.5	1.7	3.5e-05	0.026	2.2e-05	1.63333
ribonucleoprotein complex	2.1e-14	3.8	Eif4a3																			ATP binding	1.7	1.5	1.7	4.5e-05	0.022	1.5e-05	1.63333
nucleotide binding	2.8e-12	1.9	Eif4a3																			nucleotide binding	1.9	1.8	1.8	2.8e-12	8.9e-06	2.1e-10	1.83333
spliceosome	2e-09	6	Eif4a3																			non-membrane-bounded organelle	1.8	1.8	2	6.3e-09	0.00018	1.5e-12	1.86667
nuclear lumen	2.6e-09	2.4	Eif4a3																			nucleoplasm part	1.8	2.5	2	0.011	0.0034	0.00067	2.1
organelle lumen	3.9e-09	2.2	Eif4a3																			membrane-enclosed lumen	2.1	2.4	1.9	1.4e-08	5.1e-06	7.3e-07	2.13333
intracellular non-membrane-bounded organelle	6.3e-09	1.8	Eif4a3																			intracellular organelle lumen	2.2	2.5	2	8.9e-09	2.5e-06	2.2e-07	2.23333
non-membrane-bounded organelle	6.3e-09	1.8	Eif4a3																			organelle lumen	2.2	2.5	2	3.9e-09	2.6e-06	2.4e-07	2.23333
intracellular organelle lumen	8.9e-09	2.2	Eif4a3																			nucleoplasm	2.2	2.9	2	2.1e-05	6.9e-05	0.00016	2.36667
membrane-enclosed lumen	1.4e-08	2.1	Eif4a3																			nuclear lumen	2.4	2.9	2.2	2.6e-09	5.7e-07	5.9e-08	2.5
translation	7.8e-08	3.3	Eif4a3																			chromatin organization	2.5	3	2.3	0.0002	0.0021	0.00095	2.6
nucleolus	3.9e-06	3.1	Eif4a3																			chromosome organization	2.3	3.1	2.4	0.00017	0.00018	5.5e-05	2.6
nucleoplasm	2.1e-05	2.2	Eif4a3																			ATPase activity	2.3	2.8	3	0.0035	0.0091	5.1e-06	2.7
adenyl ribonucleotide binding	3.5e-05	1.7	Eif4a3																			chromatin modification	2.9	2.7	2.5	0.00011	0.03	0.0015	2.7
ATP binding	4.5e-05	1.7	Eif4a3																			nucleolus	3.1	3	2.4	3.9e-06	0.0061	0.00072	2.83333
chromatin	7.6e-05	3.6	Eif4a3																			ribosome	3.3	2.9	3.1	0.00011	0.056	0.00021	3.1
adenyl nucleotide binding	8.5e-05	1.6	Eif4a3																			ATPase activity, coupled	2.5	3.5	3.3	0.0026	0.002	5.4e-06	3.1
purine ribonucleotide binding	0.00011	1.5	Eif4a3																			translation	3.3	2.7	3.4	7.8e-08	0.0072	4.1e-09	3.13333
ribonucleotide binding	0.00011	1.5	Eif4a3																			ribonucleoprotein complex	3.8	3.4	2.8	2.1e-14	3.4e-05	9.5e-08	3.33333
ribosome	0.00011	3.3	Eif4a3																			RNA processing	3.9	4	2.1	5.2e-15	1.4e-07	0.00046	3.33333
chromatin modification	0.00011	2.9	Eif4a3																			helicase activity	2.6	3.7	3.8	0.022	0.023	7.4e-05	3.36667
purine nucleoside binding	0.00011	1.6	Eif4a3																			RNA binding	3.9	3.9	2.6	2.6e-22	5.3e-11	9.3e-10	3.46667
nucleoside binding	0.00013	1.6	Eif4a3																			chromatin	3.6	3.4	3.6	7.6e-05	0.032	3.8e-05	3.53333
chromosome organization	0.00017	2.3	Eif4a3																			chromatin binding	3.1	4.6	3.2	0.00088	0.00076	0.00046	3.63333
structural constituent of ribosome	0.00019	3.5	Eif4a3																			mRNA metabolic process	4.7	6	2.9	8.1e-16	2.9e-11	2.7e-06	4.53333
chromatin organization	0.0002	2.5	Eif4a3																			mRNA processing	5.1	6.3	2.9	1.6e-15	1.1e-10	2.8e-05	4.76667
nuclear heterochromatin	0.00022	7.9	Eif4a3																			spliceosome	6	6	3.9	2e-09	0.00037	0.00013	5.3
purine nucleotide binding	0.00023	1.5	Eif4a3																			RNA splicing	5.7	7.5	3.6	6.4e-15	7.1e-11	1.7e-06	5.6
chromosome	0.00024	2.4	Eif4a3																			nuclear chromatin	5.7	6.7	5.4	0.00044	0.021	0.00064	5.93333
nuclear body	0.00025	3.6	Eif4a3																			heterochromatin	6.2	7.3	5.8	0.00027	0.017	0.0004	6.43333
translation factor activity, nucleic acid binding	0.00027	4.2	Eif4a3
heterochromatin	0.00027	6.2	Eif4a3
nuclear speck	0.00044	4.4	Eif4a3
ribonucleoprotein complex biogenesis	0.00044	3.4	Eif4a3
nuclear chromatin	0.00044	5.7	Eif4a3
cell cycle	0.00045	1.9	Eif4a3
chromosomal part	0.00046	2.5	Eif4a3
nuclear mRNA splicing, via spliceosome	0.0005	6.8	Eif4a3
RNA splicing, via transesterification reactions with bulged adenosine as nucleophile	0.0005	6.8	Eif4a3
RNA splicing, via transesterification reactions	0.0005	6.8	Eif4a3
ribonucleotide metabolic process	0.00073	3.4	Eif4a3
purine ribonucleotide biosynthetic process	0.00079	3.7	Eif4a3
chromatin binding	0.00088	3.1	Eif4a3
N-methyltransferase activity	0.001	6	Eif4a3
ribonucleotide biosynthetic process	0.001	3.6	Eif4a3
purine ribonucleoside triphosphate biosynthetic process	0.0011	3.9	Eif4a3
ribonucleoside triphosphate biosynthetic process	0.0011	3.9	Eif4a3
DNA binding	0.0011	1.5	Eif4a3
purine nucleoside triphosphate biosynthetic process	0.0012	3.8	Eif4a3
translation elongation factor activity	0.0012	7.3	Eif4a3
organelle envelope	0.0012	2	Eif4a3
nucleoside triphosphate biosynthetic process	0.0013	3.8	Eif4a3
envelope	0.0013	2	Eif4a3
purine nucleotide biosynthetic process	0.0015	3.1	Eif4a3
cytosol	0.0016	1.9	Eif4a3
purine ribonucleotide metabolic process	0.0018	3.3	Eif4a3
purine ribonucleoside triphosphate metabolic process	0.002	3.5	Eif4a3
proton-transporting two-sector ATPase complex, proton-transporting domain	0.002	9	Eif4a3
ribonucleoside triphosphate metabolic process	0.0021	3.5	Eif4a3
organelle membrane	0.0024	1.7	Eif4a3
ATPase activity, coupled	0.0026	2.5	Eif4a3
purine nucleoside triphosphate metabolic process	0.0028	3.4	Eif4a3
mRNA binding	0.003	4.9	Eif4a3
cell cycle process	0.0033	2	Eif4a3
ATPase activity	0.0035	2.3	Eif4a3
mitochondrial part	0.0036	1.9	Eif4a3
structure-specific DNA binding	0.004	4	Eif4a3
ribosome biogenesis	0.004	3.2	Eif4a3
ribonucleoside metabolic process	0.0043	5.5	Eif4a3
ncRNA metabolic process	0.0043	2.5	Eif4a3
nucleobase, nucleoside and nucleotide biosynthetic process	0.0043	2.6	Eif4a3
nucleobase, nucleoside, nucleotide and nucleic acid biosynthetic process	0.0043	2.6	Eif4a3
nucleoside triphosphate metabolic process	0.0048	3.1	Eif4a3
mitochondrial envelope	0.0051	2	Eif4a3
transcription coactivator activity	0.0051	3.4	Eif4a3
purine nucleotide metabolic process	0.0051	2.7	Eif4a3
cell division	0.0054	2.2	Eif4a3
mitochondrial membrane	0.0058	2	Eif4a3
ribosomal subunit	0.0063	4.2	Eif4a3
protein methyltransferase activity	0.0066	5	Eif4a3
ATP biosynthetic process	0.0078	3.5	Eif4a3
transcription cofactor activity	0.0087	2.5	Eif4a3
synaptogenesis	0.0091	9	Eif4a3
nucleotide biosynthetic process	0.0095	2.5	Eif4a3
transcription factor binding	0.01	2.1	Eif4a3
nucleoplasm part	0.011	1.8	Eif4a3
nuclear chromosome	0.012	2.9	Eif4a3
nuclear hormone receptor binding	0.012	5.5	Eif4a3
histone methyltransferase activity	0.012	5.5	Eif4a3
chaperonin-containing T-complex	0.012	16.9	Eif4a3
ATP metabolic process	0.013	3.2	Eif4a3
cytoskeleton-dependent intracellular transport	0.013	5.4	Eif4a3
microtubule-based transport	0.013	8	Eif4a3
Golgi apparatus part	0.013	2.3	Eif4a3
biopolymer methylation	0.014	3.5	Eif4a3
vesicle transport along microtubule	0.015	15.4	Eif4a3
mRNA splice site selection	0.015	15.4	Eif4a3
RNA methyltransferase activity	0.015	7.5	Eif4a3
sex chromatin	0.015	7.5	Eif4a3
nuclear chromosome part	0.015	3.1	Eif4a3
sex chromosome	0.017	7.2	Eif4a3
protein serine/threonine kinase activity	0.018	1.8	Eif4a3
hormone receptor binding	0.019	4.8	Eif4a3
nucleoside metabolic process	0.019	3.8	Eif4a3
single-stranded RNA binding	0.02	6.8	Eif4a3
centrosome	0.02	2.5	Eif4a3
proton-transporting two-sector ATPase complex	0.021	4.7	Eif4a3
cytosolic part	0.021	3.8	Eif4a3
helicase activity	0.022	2.6	Eif4a3
nitrogen compound biosynthetic process	0.022	1.9	Eif4a3
organelle fission	0.022	2.2	Eif4a3
methylation	0.023	3.2	Eif4a3
transcription	0.023	1.3	Eif4a3
protein folding	0.025	2.5	Eif4a3
organelle inner membrane	0.027	1.9	Eif4a3
poly(A) RNA binding	0.028	11.3	Eif4a3
positive regulation of cell proliferation	0.028	1.9	Eif4a3
purine nucleoside metabolic process	0.028	6	Eif4a3
purine ribonucleoside metabolic process	0.028	6	Eif4a3
RNA modification	0.029	4.3	Eif4a3
metallo-sulfur cluster assembly	0.03	10.8	Eif4a3
iron-sulfur cluster assembly	0.03	10.8	Eif4a3
lysine N-methyltransferase activity	0.031	5.8	Eif4a3
histone-lysine N-methyltransferase activity	0.031	5.8	Eif4a3
protein-lysine N-methyltransferase activity	0.031	5.8	Eif4a3
generation of precursor metabolites and energy	0.031	1.9	Eif4a3
protein amino acid alkylation	0.031	4.2	Eif4a3
protein amino acid methylation	0.031	4.2	Eif4a3
ncRNA processing	0.033	2.3	Eif4a3
poly-purine tract binding	0.033	10.2	Eif4a3
mitochondrial membrane part	0.035	4	Eif4a3
pore complex	0.037	3.2	Eif4a3
mitochondrial inner membrane	0.038	1.9	Eif4a3
unfolded protein binding	0.038	3.2	Eif4a3
Golgi apparatus	0.04	1.5	Eif4a3
nuclear division	0.04	2.1	Eif4a3
mitosis	0.04	2.1	Eif4a3
mitotic cell cycle	0.04	1.9	Eif4a3
cellular macromolecular complex assembly	0.04	2	Eif4a3
proton-transporting ATP synthase complex, coupling factor F(o)	0.041	9.1	Eif4a3
phosphatidylcholine metabolic process	0.042	9	Eif4a3
M phase of mitotic cell cycle	0.045	2	Eif4a3
one-carbon metabolic process	0.045	2.5	Eif4a3
phosphorylation	0.045	1.4	Eif4a3
cell aging	0.046	4.9	Eif4a3
response to radiation	0.046	2.3	Eif4a3
synapse organization	0.047	3.7	Eif4a3
neuron maturation	0.049	8.3	Eif4a3
microtubule organizing center	0.051	2.1	Eif4a3
mitochondrion	0.051	1.3	Eif4a3
mitochondrial outer membrane	0.052	3	Eif4a3
reproductive cellular process	0.053	2.1	Eif4a3
M phase	0.053	1.8	Eif4a3
regulation of transcription	0.054	1.2	Eif4a3
regulation of oxygen and reactive oxygen species metabolic process	0.055	35.9	Eif4a3
negative regulation of retinoic acid receptor signaling pathway	0.055	35.9	Eif4a3
rRNA processing	0.055	2.9	Eif4a3
proton transport	0.056	3.4	Eif4a3
single-stranded DNA binding	0.056	4.5	Eif4a3
rRNA metabolic process	0.058	2.9	Eif4a3
spindle	0.058	2.5	Eif4a3
proteasome complex	0.059	3.4	Eif4a3
hydrogen transport	0.059	3.4	Eif4a3
phosphate metabolic process	0.061	1.4	Eif4a3
phosphorus metabolic process	0.061	1.4	Eif4a3
ribonucleoprotein binding	0.061	4.4	Eif4a3
cytoplasmic membrane-bounded vesicle	0.061	1.6	Eif4a3
protein catabolic process	0.062	1.5	Eif4a3
DNA packaging	0.063	2.5	Eif4a3
blastocyst development	0.063	3.3	Eif4a3
spliceosome assembly	0.064	7.2	Eif4a3
neuroblast proliferation	0.064	7.2	Eif4a3
melanosome	0.064	2.8	Eif4a3
pigment granule	0.064	2.8	Eif4a3
ATPase activity, coupled to transmembrane movement of ions, phosphorylative mechanism	0.064	3.3	Eif4a3
microtubule cytoskeleton	0.065	1.6	Eif4a3
double-stranded DNA binding	0.065	4.3	Eif4a3
membrane-bounded vesicle	0.068	1.6	Eif4a3
ribonucleoprotein complex assembly	0.068	4.2	Eif4a3
organelle outer membrane	0.069	2.7	Eif4a3
oxidative phosphorylation	0.07	3.2	Eif4a3
protein phosphatase binding	0.074	6.6	Eif4a3
cell cycle arrest	0.074	3.1	Eif4a3
regulation of cell proliferation	0.074	1.5	Eif4a3
cell cycle phase	0.075	1.6	Eif4a3
pronucleus	0.075	6.6	Eif4a3
cytosolic ribosome	0.075	6.6	Eif4a3
large ribosomal subunit	0.075	4	Eif4a3
regulation of cell cycle	0.076	1.8	Eif4a3
outer membrane	0.078	2.6	Eif4a3
membrane organization	0.078	1.7	Eif4a3
ATP-dependent helicase activity	0.079	2.6	Eif4a3
purine NTP-dependent helicase activity	0.079	2.6	Eif4a3
protein polyubiquitination	0.08	6.3	Eif4a3
cellular macromolecular complex subunit organization	0.081	1.8	Eif4a3
regulation of retinoic acid receptor signaling pathway	0.081	23.9	Eif4a3
phosphoprotein binding	0.081	6.3	Eif4a3
respiratory chain	0.082	3	Eif4a3
proton-transporting ATP synthase complex	0.082	6.2	Eif4a3
translation initiation factor activity	0.082	3	Eif4a3
ATP synthesis coupled proton transport	0.083	3.9	Eif4a3
energy coupled proton transport, down electrochemical gradient	0.083	3.9	Eif4a3
transcription activator activity	0.085	1.7	Eif4a3
ethanolamine and derivative metabolic process	0.088	6	Eif4a3
macromolecular complex assembly	0.09	1.6	Eif4a3
positive regulation of cellular biosynthetic process	0.092	1.4	Eif4a3
intracellular transport	0.095	1.5	Eif4a3
tRNA metabolic process	0.095	2.2	Eif4a3
protein kinase activity	0.097	1.4	Eif4a3
eukaryotic translation elongation factor 1 complex	0.097	19.7	Eif4a3
Barr body	0.097	19.7	Eif4a3
phosphatase binding	0.098	5.6	Eif4a3
positive regulation of biosynthetic process	0.098	1.4	Eif4a3
protein transporter activity	0.098	2.8	Eif4a3
